# Supplementary material for: Generation, Annotation and Analysis of First Large-Scale Expressed Sequence Tags from Developing Fiber of Gossypium barbadense L
Source: PLOS journal article supplement (doi:10.1371/journal.pone.0022758), 2011-07-28
Supplement: S3 (10.1371/journal.pone.0022758.s003) [file journal.pone.0022758.s003]

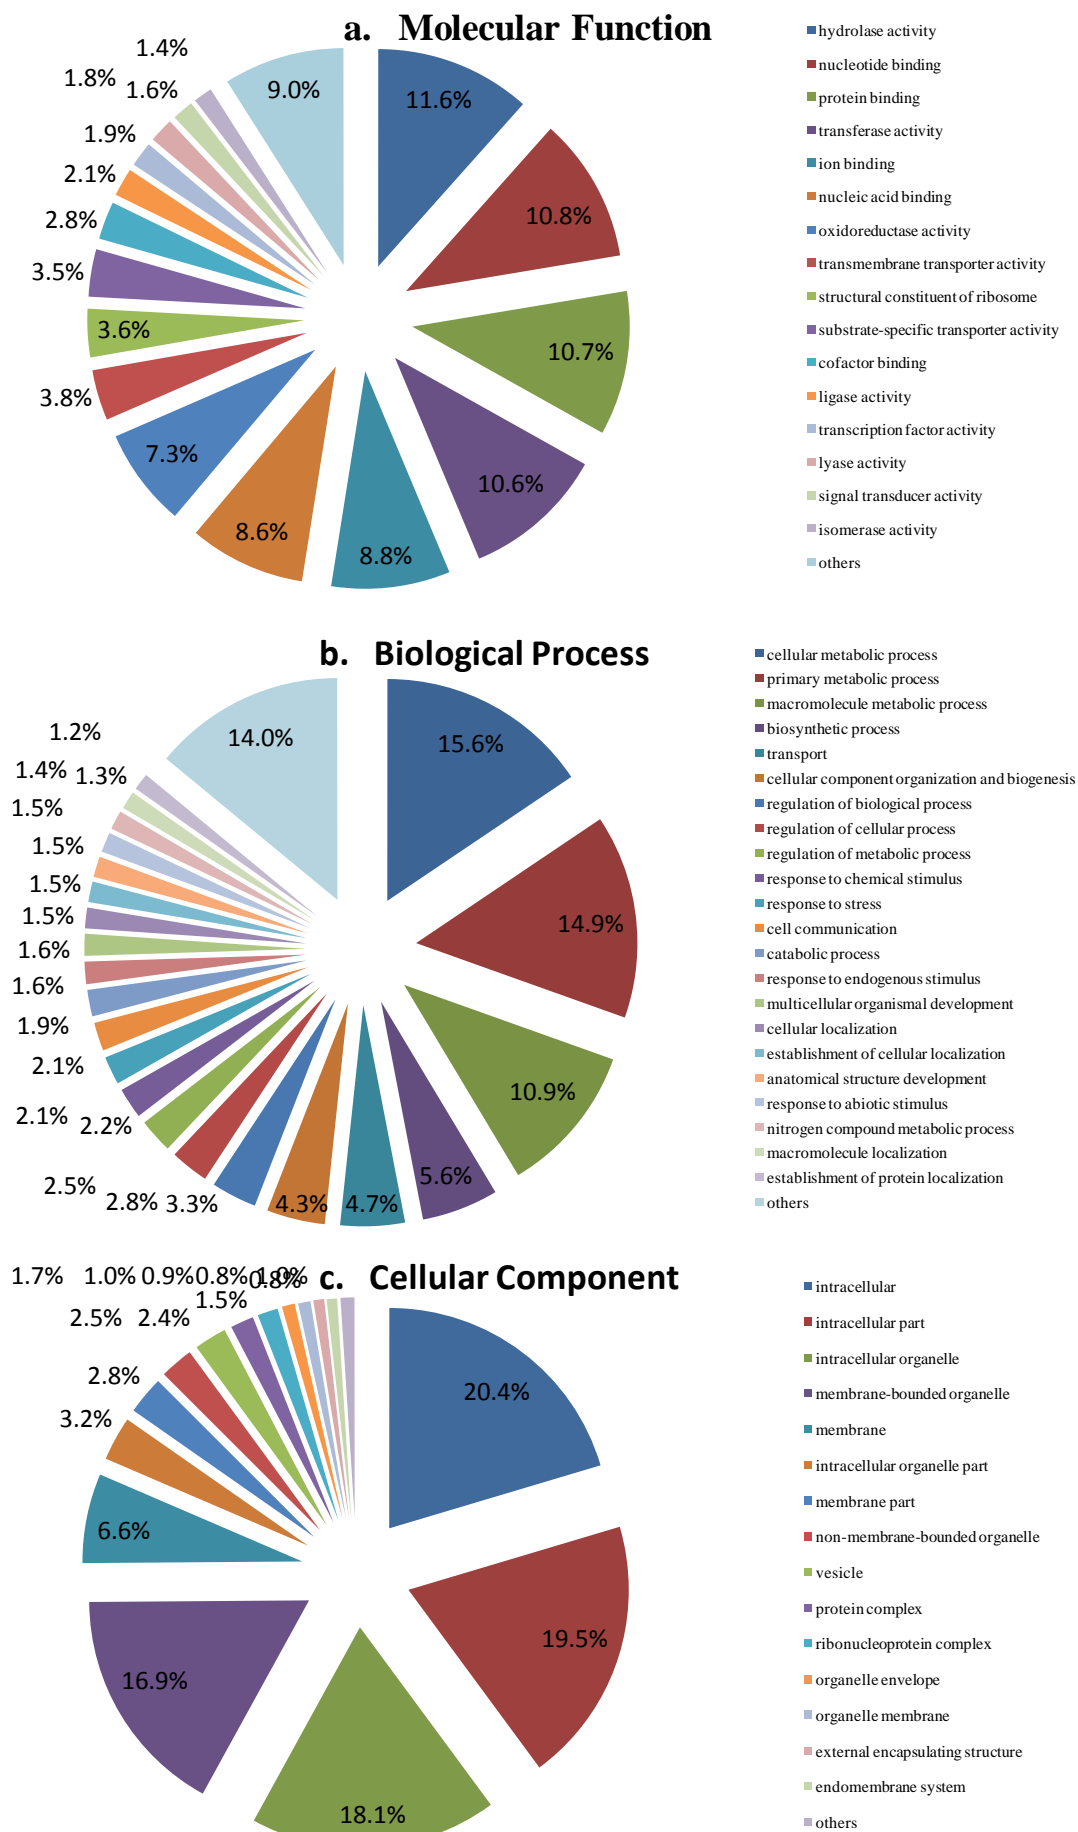

Figure S3 Functional classifications for the 5,852 unigenes which were assigned with GO terms (third level GO terms). The

three GO categories, biological process (a), molecular function (b) and cellular component (c) are presented.
