# Supplementary material for: Generation, Annotation and Analysis of First Large-Scale Expressed Sequence Tags from Developing Fiber of Gossypium barbadense L
Source: PLoS One. 2011 Jul 28;6(7):e22758. doi: 10.1371/journal.pone.0022758 (PMC3145671; doi:10.1371/journal.pone.0022758)
Supplement: Table S1 — The length distribution of ESTs, contigs, singletons, and unigenes. (XLS) [file pone.0022758.s005.xls]

## Sheet: TableS1
Table S1 The length distribution of ESTs, contigs, singletons, and unigenes
	ESTs	UniGenes	Contigs	Singletons
Min Length (bp)	100	100	103	100
Max Length (bp)	1211	3214	3214	1184
Average Length (bp)	646	705	914	633
100-199 bp	598	341	19	322
200-299 bp	610	306	32	274
300-399 bp	718	340	42	298
400-499 bp	907	389	56	333
500-599 bp	1082	502	88	414
600-699 bp	1505	702	138	564
700-799 bp	2264	1012	170	842
800-899 bp	2625	1327	292	1035
900-999 bp	335	304	167	137
>=1000 bp	335	629	488	141
Total Sequences	10979	5852	1492	4360
