# Supplementary material for: Generation, Annotation and Analysis of First Large-Scale Expressed Sequence Tags from Developing Fiber of Gossypium barbadense L
Source: PLoS One. 2011 Jul 28;6(7):e22758. doi: 10.1371/journal.pone.0022758 (PMC3145671; doi:10.1371/journal.pone.0022758)
Supplement: Table S2 — Ninety three highly abundant genes in the 10,979 ESTs (ESTs≥10). (XLS) [file pone.0022758.s006.xls]

## Sheet: TableS2
Table S2 Ninety three highly abundant genes in the 10,979 ESTs(ESTs≥10)
Contig no.	Contig length	Total of ESTs	Putative function	Senquence
CO000020	3214	410	Putative senescence-associated protein	gcgggattacccgctgagtttaagcatatcaataagccgaggaaaagaaacttaccaggattcccctagtaacggcgagcgaaccgggaaaagcccagcttgagaatcggtcgccatcggcgtccgaattgtagtctggagaagcgtcctcagcgacggaccgggcccaagtcccctggaaaggggcgccggagagggtgagagccccgtcgtgcccggaccctgtcgcaccaagaggcgctgtctacgagtcgggttgtttgggaatgcagccctaatcgggcggtaaattccgtccaaggctaaatacgggcgagagaccgatagcgaacaagtaccgcgagggaaagatgaaaaggactttgaaaagagagtcaaagagtgcttgaaattgtcggg…
CO000092	1882	91	Alpha tubulin	tattccggaaggcgtcttgatacacgcccccatttattttatttttcaaacaaattttcccttcaattttcgtataatttcctaggaaaagaaatatgagagagtgcatttcagttcacatcggtcaggccggtattcaggtcggaaatgcttgctgggaactttactgtctcgagcatggcattcagcctgatggccaaatgccaagtgataagactgttggtggaggagacgatgctttcaacacctttttcagcgaaactggtgccgggaagcacgtccctcgcgccatctttgttgatctggagcctactgttatcgatgaagtgaggactggtacgtaccgccagttattccaccctgagcaactcatcagtggcaaagaagatgctgccaaca…
CO000193	2009	91	E6-3 protein kinase	aatataattttaagtacaatatataagatctctgacgtcgcacgcacgcgtatataagctcggatcctctagagcgcccgcccgttcggagaatgggttttcagtgttgagtccataaacggagctcgacgaagcccaaacgatcgctaacaaaattcttaaattactcataaacctcgttgaaaaaggttacaacatttttctactttttaaatgcattttaccaaccctgcagacacctgtgactgacaccattttcaccatcatcaccaccacccatgatcaaaagacaacaaaacatgtgtgcatggcggtggacacggcggtgagagggaaaatataagggaaattttattcaacactaccaacacaaaaacccaaaggaaaataacagcaaca…
CO000009	1202	88	Fasciclin-Like arabinogalactan protein	gctaaattggtatccaaaactactcaactttctctctgaattcctacaagttaggagtttggagagtggtcaccgctgaagcaaaacaattttcttgggggaaaagaaaatggagttttccatgatttttatgattagcttctctgtattgattttgtgctcctcactggcatatggtcaagttgcaatgagcacaagcccgacaccgtcaccctcaccagcaccggcaccgacaccggcatacacaaatatcaaagacttactctctgtggcaggtccatatcacaagttcctgggctacctcgagtcgactaaattaatcgacacgttccaaatccaagccaacaacacggttgaaggcattacgattttcgtaccgaaagacagcgcattcaaggc…
CO000013	1807	66	Alpha tubulin	tgtgtttttttttagtccccaaatggattctccctttcccttcaaatggcaacccctcccctttcatcgcctacttatctcaccaccaatttaggcgtcggctacgccatcgtcgtcgccctcggcttcccttagaaggtgtcttaataaacgccttctttcttcttcttcttattcctttattgctttttagaatttttcttaatcgaaaatgagagagtgcatttcgatccacatcggtcaggccggtatccaggtcggaaacgcttgctgggagctttactgtctcgagcatggaatccagcctgatggtcagatgccaagtgacaaaactgtcggaggaggtgatgatgcttttaacacctttttcagtgaaactggtgctgggaagcacgtccc…
CO000006	669	65	High-Glycine tyrosine keratin-like protein	tttctattctcaatttccccatctctctcgtctctgggtctcgtaagttggtgaatagtgttgtaattagcgccaatggctcggattgggacctctgcagctcacattgtgttggcaatattttctgtggccatgtttgttgtgtccgggaccatggcacaggatattgctccttctcctgcaatggctaccggagcaggctctgctttgccggtttccgctgtcttcttatgctcttccatgttggtctctttaattgctctcttggtgcattgaattcaaagcttttcaagactttatgacattggctacccttaatttcactctcactggtgatgaggggagtagcctctaatcttctccgagataatatttgggtgttatcaattttcaatttct…
CO000128	643	63	Fiber protein Fb28	atcagcaatactccaagcaaccattttccttaaaagtttgtttttcttgtgattaatccatatggctagctcaatgtcccttaagcttgcatgtctgttggtgttgtgcatggtggtgggtgcacccctggctcaaggggccataacccgtgctgatggcttagtcggcctcccacgctgccttccttttttgtcagggaatggtgatggtgctgatgccacaggttgctgtgccatcgtcatgaatgccttgggatcgctctgtggtgatacataggaaccgatctagcttgaaatcgggttcggatttgggtggaatttcaaattggtgtgttatggaatcccaacttaatcgtgtttaagggtgggatccaattgtgtgatacattacagagcatg…
CO000056	1047	56	Fasciclin-Like arabinogalactan protein	acacaaaccaaaagacatggcttcatcatctcctctttctcccattctcctctctctgtttctagtattcatttgtggggtgtcagctcaaacggctcccgcccctgccccctctggccccttgaatttcactggaatccttgacaaaaatggccaatacacctacttccttcagcttttggcacagactcaagttgggagccaagtacaaactcaactgaaaaccaccactgaaggctttaccgtctttgctcccacagataatgccttcaacaacctcaaacctggtaccgtcaataacctggacccacaacagaaagtacaactagttctataccacgttattcccaaatactactccttgaacgatctccaatttgttagcaaccccgttagaac…
CO000170	936	54	Lipid binding protein	aatccacctctttagtcccctccacatcccctcacctataaattcacactcacccatctcttttcccttcccatcatcaaattccaacactcaattccaaaacacacaccaaattccagcacccaaaataatggccctctgcaagccgtattctaggttggtcctagcactggccatggcattggtggcagctacggtgcctgtttatgggcagagaactatcaacactccatgcaccccatcggcacttaacatcttcactccttgtatgaacttgcttaccaatagcagtgccaatggtacttcgcccactgcagattgttgcaactcgcttaaaacgctcacatcgagcggcatggactgtttgtgcctcattgtcaccgggagtgtcccgttccg…
CO000145	1937	52	Alpha expansin	cacgcgtccggtcaaccaattgtttgagctagctagctcttactcaaatggcaaccaaaacgatgatgttgcaaatattttcacttttcttctttttgttcagtgtatgcaactccattttccttggtgctaatggagatgacaatggtggttggcaaactgcccatgccaccttctacggtggtgctgatgctaccggcacaatggggggagcttgtggttatggaaacctgtacagtcaagggtatggaacgagcacagcagctttgagcactgcacttttcaacaatggcttgagctgcggtgcctgctacgagctccggtgcaacaatgatcctcaatggtgcattagtcgaaccataaccgtgacagccaccaacttttgtccccctaactatg…
CO000026	1207	43	Protodermal factor	cggacgcgtgggttccaatctttcattctttgctgttgaagtagtaatatctatagcatacagagatggagaggcaaagaagcaagcaggtttgtttgttgatgtgggttttggttgctgcctttttctcccacaatagggtcattgcagtgacctccactggccttggtgagcagaaaaactactatccagctcctgaccctcatgctggaactcccccttcaggttcacatggcacaccaccatcttcaggaggtggatcacctccctctcatggaaccccgtcacatggaggtggttaccacccttcaccaacaccatcaacgccttcgggtggaaattgtggaactcccccacatgacccttcaactccatcaacaccatcacacactccttctc…
CO000218	923	43	Fblate-2 gene	actcaaaattctttgctttgtatttcgttaaccatggctcataacactcgtcaccctttcttccttttccaacttttactcattagtgtctcactaatgatcggtagccacaccgtctcgacagcggctcgacgtttattcgagacacaaacaacctcatcggagttgccacaattagcttcaaaatacgaaaaactggaagagtctgaatatgaaaagccggaatacaaacagccaaagtatgacgaagagtacccaaaacatgagaagcctgaaattcacgaggaaaaacaaaaaccgtgcaagcaacatgaagagtaccacgagtcacacaaatcgaaggagcacgaagagtaccagaaagaaaaacccgagttccccaaattggaaaagcctaaa…
CO000075	1819	42	Alpha tubulin 6	atttcaaattgttatctctgaaggtgtcttaataaacgccttcgatttactttcgatttccatttacttctctattgctacgtttttgaatttttagtgagcgaaaatgagagagtgcatttcagtccacatcggtcaggctggtattcaagtcggaaatgcctgctgggaactttactgccttgaacatggaatccagcctgatggccagatgccaagtgacaagactgtcggaggaggtgatgatgcttttaacacctttttcagtgaaactggtgctggaaagcacgtccctcgtgctgtctttgtggatcttgagcctactgttattgatgaagtgaggactggtacttaccgtcagcttttccaccctgagcaactcatcagcggcaaggaaga…
CO000083	823	36	Glycine-Rich RNA-binding protein	cagttctctccaaaatatctgctcctctcttagtttccctttttgtaccttgtttatttgatacttccccctcatggccgccgctgatgtcgagttccggtgcttcgtcggagggctcgcatgggccaccgacgaccgggcccttgaagaagccttcagtgcgtttggtgaaatcgtcgaatcgaagatcattaatgatcgtgagactggaagatcccgaggctttggattcgttactttccgtgacgagaaagctatgagggacgcgatcgaaggaatgaacggtcaaaatcttgatggaaggaacataactgtcaacgaagcccaatcgcgcagaagtggaggcggtggcggaggatttggaggaggaaacggtggttacagccgcggtggaggcgg…
CO000298	1873	33	Gossypium hirsutum 18S ribosomal RNA gene	ctgccagtagtcatatgcttgtctcaaagattaagccatgcatgtgtaagtatgaacaaattcagactgtgaaactgcgaatggctcattaaatcagttatagtttgtttgatggtatttgctactcggataaccgtagtaattctagagctaatacgtgcaacaaaccccgacttctggaagggatgcatttattagataaaaggtcgacgcgggctttgcccgttgctctgatgattcatgataactcgacggatcgcacggcctttgtgccggcgacgcatcattcaaatttctgccctatcaactttcgatggtaggatagtggcctactatggtggtgacgggtgacggagaattagggttcgattccggagagggagcctgagaaacggctac…
CO000364	1257	32	Fblate-2	ttaaaattcttttctttctatttggttaaccatggctcataactttcgtcatcctttcttccttttccaacttttactcattactgtctcactaatgatcggtagccacaccgtctcgtcagcggctcgacatttattccagacacaaacaacctcatcaaagctgccacaattggcttcaaaatacgaaaagcacgaagagtctgaatacaaacagccaaaatatcatgaagagtacctaaaacatgagaagcctgaaatgtacaaggaggaaaaacaaaaaccctgcaaacatcatgaagagtaccacgagtcacgcgaatcgaaggagcacgaagagtacgataaagaaaaacccgatttccccaaatgggaaaagcctaaagagcacgagaaaca…
CO000017	1296	29	Chitinase-Like protein	caacaacaacaagaaaaaacccagtattctgtcatcactatggaggccaaatggctgctattttttacaatggcagcactaatggcagtggcaaacggccaggaatcagtgaagccattggtgaagatagttaaaggcaagaaactttgtgataaagggtgggaatgtaaagggtggtcacagttttgttgtaaccaaaccatttctgattacttccaaacttatcaatttgagaaccttttcgctaaacgtaatacaccggtggcacatgcggttgggttctgggattaccattctttcattacggcggcggctcagtatcagcctcatggttttggtaccaccggcggtaagctgcagagcatgaaggaagtggcagcttttcttggacatgtcggc…
CO000570	1066	29	Fasciclin-Like arabinogalactan protein 3	tcaactttctctctgaactcctccaagttaggagtttggagagtggtcaccgctgaagcaaagccaaatttcttgggggaaaagaaaatggagttttccatgatttttatgattagcttctctgtattgattttgtgctcctcactggcatatggtcaagttgcaatgagcacaagcccgacaccgtcaccctcaccggcaccgacaccggcatacacaaatctcaaagacttactctctgtggcaggtccatatcacaagttcctggactacctcgaatcgactaaattaatcgacacgttccaaatccaagccaacaacacggttgaaggcattacgattttcgtaccgaaagacaacgcattcaaggctcttaagaagccttcattgtcaaatcta…
CO000095	1300	28	Dehydration-Induced protein RD22-like protein	ctaacttttagattccctttccattgcactgctctttctttctatagaattagtcactcctgttctagatgaaggttctctccccaattcttgcttgcctagcgcttgctgtggtggtaagccatgctgctctctcacctgagcaatattggagctataagctgccaaatactccaatgccaaaggctgtcaaagaaattctacatccagaactgatggaggagaaaagcacctctgtaaatgtaggaggtggtggtgtaaacgtcaatacaggaaaagggaagcctgggggtgacacccatgtgaacgttggaggcaaaggagttggagtgaacacgggaaagccagggggtggcactcatgtgaatgttggagacccttttaattacctatatgcag…
CO000185	1126	27	Ubiquitin	atttgtttgctttgtatattgaagtttcctttctcgattttctatttagccaaacaagatgcagatcttcgttaagactctaaccggcaagacgatcactctcgaggtcgagagctccgacacgatcgacaacgtgaaggccaaaatccaagataaggaaggcatccctccagaccagcagcgtctgatcttcgccggaaaacagctcgaagacggccggaccttggccgattacaacatccaaaaggagtcaactctccacctcgtcctccgtctgcgcggtgggatgcaaatcttcgtgaaaaccttgactggcaagacaatcactctcgaggtcgagagctccgacacgatcgacaacgttaaagcgaagatccaagacaaggaaggcatcccccc…
CO000356	1447	26	HMG box family protein	caaaattctttgctttgtatttcgttaaccatggctcataacactcgtcaccctttcttccttttccaacttttactcattagtgtctcactaatgatcggtagccacaccgtctcgacagcggctcgacgtttattcgagacacaaacaacctcatcggagttgccacaattagcttcaaaatacgaaaagcaggaagagtctgaatatgaaaagccggaatacaaacagccaaagtatgacgaagagtacccaaaacatgagaagcctgaaattcacaaggaggaaaaacaaaaaccgtgcaagcaacatgaagagtaccacgagtcacacaaatcgaaggagcacgaagagtaccagaaagaaaaacccgagttccccaaattggaaaagcctaaa…
CO000658	600	25	Metallothionein-Like protein	tgttgttacgatatttgtattaagaatcgccctttagtgatcagtgaggtgaagaaaaatgtcttgctgtggtggaaactgcggttgcggcttcggttgcaagtgcggcagcggctgcggcggttgcaagatgtaccctgagatgaactttgctgagcaaaccacaaccgggacacttgttcttggcgtggcaccccggaaagtgcactttgatggagctgaaatggaaactggggctgaaaatggctgcaaatgtggagataactgcacttgcaacccttgcaattgtaaatgagaaaaaaaagctaagcataatatggaagctgatctaaataatatatgatgtatttgggtttttactattagaataaagcagctatggttcattaggtgttttgc…
CO000081	1641	23	Beta tubulin 1	aaagaatttccggaattcttattccttttatatttttcctctccaattttccgtcactttcccgagaaaatgagagaaatccttcacatccaaggtggccaatgcggcaatcagataggagccaagttctgggaagtcgtatgtgccgaacatggcatcgattcaacgggtcgatatggtggtgactcggagctccagcttgagcgaatcaatgtttactacaacgaagccagttgtggccgttttgttccccgcgcagttttaatggatctggaacccggaaccatggatagcgtaagatccggtccttacggacaaattttccgacccgataacttcgttttcggacagtccggtgcgggaaacaattgggctaagggacattacactgaaggagcg…
CO000130	1199	23	Arabinogalactan protein 2	acatttttgttcaaggaccacttcttcccttccattttactttgttttagttgccataacgtcaccttccaatacaacccacaatgaggcaacaatatgtcttcactactctcacgttgctcatcctgttttccctcagttgttcaacaacattagcccaatctccggcactggccccggcaccttctggtccgacaaacgtcaccaagatcctcgaaaaagctggtcaattcaccctcttcattcgtcttctaaagtccactcaagtggccaaccagctgctcggtcagctcaacaattccaacaatggtatgaccgtttttgcaccaacggacaatgctttctccagccttaaatcgggcacattgaattcactcaccgatgaacaaaaagtgcagc…
CO000108	1578	22	Translation elongation factor 1A-6	ttcagctattacgtggagagcctttttttttgtgtagcgattctcagttagtcttttctttaagcttacagcttctctccagagttttataatgggtaaggagaaggttcacatcaaccttgttgtcattggccatgtcgactctggcaagtcgaccactactggtcatttgatctacaagctaggtggtattgacaagcgtgtgattgagaggttcgagaaggaggctgctgaaatgaacaaaaggtcattcaagtatgcttgggtgcttgacaagcttaaggctgagcgtgaacgtggtatcaccattgatattgccctgtggaagtttgagaccaccaaatactattgcaccgttattgatgcacctggacaccgtgactttatcaagaacatgat…
CO000117	770	21	Cyclophilin	aagcagaaaatatctcaaatctcttcctcctcctcagaaatcttagtatcatcaccatggcctcaaatcccaaggtcttctttgacatgactatcggtggtcagcccgctggtcggattgtgatggagcttttcgcagattgcactcctcgcactgctgagaacttccgtgccctctgtaccggcgagaaaggcgtcggccgcagcggtaagcccctccactacaaaggctcctctttccatcgtgtgatccctaactttatgtgccaaggaggtgacttcaccgccggaaacggtaccggaggtgaatccatctacggatccaagttcgctgacgagaacttcatcaagaagcacactggtcccggtattctctcaatggctaacgctggtcccggaa…
CO000153	1037	20	Proline-Rich cell wall protein	cacgcgtccgttctcatttcacacgggttgtggcgtagtttaagcagagaggttgcgcaggataaagtctcttcaccattgtttcaacatgaaggtttgtaataaaaatttgtttctatcagcattgctttgcattgctattgcaggagttttgggtcaagctcctagtaatcctcctacgtctacgccggcgccacccacaccaccggcttctactcctcctccgacgactcaaccaccgcctacaccaaccgccactccgccaccagtttctactcctcttcccacttcatcaccgcccccagtgacagcttctccacccccagtttcaactcctccacccagttctcctcctcccgcaactccaccacctgcttctccacctcctgcaactccacc…
CO000213	1075	20	Ribonuclease t2	cgagagaaaaaaaaacttctaaaaacatgaaactcacctcaggttcaatcgttatcatcaaccttttggcattacaatacttgcctgttctttgtctctcacaagattttgatttcttctactttgttctacagtggcctggatcatactgcgacacgaaacaaagatgttgttacccgaagacgggaaagccttccgcggattttgggatccatggactttggcctaattacaacgatggtggctacccttccaactgtgaccccaacagtcgtttcgacaaatctgagatttcaagcctgattgggagtctggaaaaggaatggcccactctttcatgtcctagcaacgatggagttaagttctggactcatgaatggctaaaacatgggacttgct…
CO001253	478	20	Ubiquitin	tcgattctcgccgactacaacatccagaaggagttgaccctccacctggtgctccgcctccgcggcggcgccaagaagcgcaagaagaagacgtacaccaagcccaagaagcagaagcacaagcacaagaaggcgaagctcgccgtgctccagttctacaaggtggacgacgccaccggcaaggtcacccgcctccgcaaggagtgccccaacgccgagtgcggcgccggcaccttcatggccaaccacttcgaccgccactactgcggtaagtgcggcctcacctacgtctacaaccagcaggcttaggcgtaggctcctgttctttgggggcggaagtaaggaaggaggaggaaatcgaactggttattagatgataattaatccttttttgtcatg…
CO000021	1108	19	Aquaporin PIP2	gtaccatcaactcagaacagctcaaaaaagcttccaacattttgaagaaacaaagaatcaaacatgtcgaaggaagtgagtgaagaagggatgagccgaaaggactatgtggatcctccaccggcaccgctcatcgacgtggctgagatcaagctttggtctttttacagagctctcatcgccgaattcatcgctactctccttttcctatacgtcaccatagccaccgtcatcggccacaagaaacaacacgatgcatgcgatggtgttggtcttttgggtattgcttgggcttttggtggcatgattttcattcttgtttactgcaccgccggtatctcaggtggtcacattaacccggcggtgacatttgggttgtttttggctaggaaggtgtcg…
CO000039	1067	19	Fasciclin-Like arabinogalactan protein 6	acaaaccatagcacagcaaaaaaaaaacacaccctaaagagacaatgagaaagctgctagcctttgcctttcttttcttcttcttttgggataaaacattagctcaaatagctccggcgccgccgttaaaggtggacaacatcacttccatcctcgaaaaaggtggccaattcaccactttcatcaagctattgaaagccacacaggtggctgatcaactaaacaaccagctaagcacaccggaccctaacgacgggataacggtgtttgcaccgagtgacaacgcgttctccggactcaaacccgggacgttaaactcactttccgaccaagagaagcttcagttggttcagttccatatactcccgacgttaatgtcgacgtcgcagtttcaaaccg…
CO000064	2445	19	endo-1,4-Beta-Glucanase	cgcttcgtcttggtagatcagatctgtcggtgctcctgcattttccgcccactactcttccaaatcctcatcatgtacggcagagatccgtggggaggtcccctggagataaacgccactgattctgccactgacgacgacaggagcaggaatctgcaggacctggatagggctgcactctctcgccccttggacgagactcagcaaagctggctgcttggccccggggagcaaaagaagaagaagaagtacgttgatctcggatgtatcattgtgagccgcaagatctttgtatggaccgtggggaccctgctagtctccgccctcctggccggactcatcaccctcatcgtcaagactgtcccacgtcatcaccaccgccactctccgcccgataac…
CO000029	1452	18	Cysteine protease	cccgggtcgacccacgcgtccgcggacgcgtgggcggacgcgtgggcggacgcgtgggcaaacctttctctccaacaacccttctcaaatctcccatggaattaacccttcttttcccccttttcttcttcttcaccttatcttttgctacatacatatccactctaaccttaaaccaaaaccatccatcatcatcatcatcatcaagctggagaagcgatgatgaagtgatgggattgtacaaatcttgggtcatccaacatggcaaagcttacaatggtatcggtgaagaagagaaaaggttcgaaatctttaaggataacttgatgttcattgatgaacataactctaacaacaacactacatataagcttgggttgaacaagtttgcggatttaa…
CO000214	1398	18	Fructose-Bisphosphate aldolase	tcttccttttcccctcgctcttctttcctcctagccaaaaaaaaaaaaaaaagcctctttcctttctctcgttctttttcctgttcaatcatgtcttgcttcattagcaaatatgccgatgagttggctaaaaacgctgcttacattggaacccctggaaagggtatccttgctgctgatgaatccactggcaccatcggcaagcgtctttcaagtattaatgtagagaatgttgaagacaacaggcgtgctctccgtgagctcctattcacaactcctggagctcttcagcacctcagtggtgttattctctttgaggaaaccctttatcaaaaaaccgcttcgggcaagcccttcgttgatgttttgaaggaaggtggtgtcctccctggcatcaag…
CO000241	1244	18	Chitinase-Like protein (CTL2) gene	acgaccaccacattttgctttgtatctttgataatggaagccaaatggctggttcttttttcagtggcggcaatgctggtggcactggccaactgccaggaatcgttgaagccattggtgaagatggtaaagggcaagaagctgtgtgacaaagggtgggaatgtaaagggtggtcaaagtattgttgcaaccataccatttctgattacttccaaacttaccagtttgaggacctttttgcgaagcgtaacacgccggtagcacatgcggttgggttctgggattaccattccttcattactgctgctgctcagtatcagcctcatggattttgtaccaccggggaaaagctccagaatatgaaggaagtcgctgcttttcttggacatgtcggcagc…
CO000093	1762	17	Actin	agcagctgcaccacggagaagagagaaaaactgaaaaaggggaaaaaaagcgtcgtcgtttttgcttcttcttctacttcgctctctctctttctccgaagttcctctttcgttctttcatttattcagtattgtaaaagatggccgacggtgaggatattcaacccctcgtctgtgataatggaactggaatggtgaaggccggttttgctggtgatgatgctccaagggcagtttttcccagtattgttggtcgtccccggcacactggtgttatggttgggatgggtcagaaggatgcctatgtaggagatgaagcacaatctaaaagaggtatccttactttgaaatatcctattgagcatggtattgtgagcaactgggatgatatggaaaaga…
CO000515	1161	17	Proline-Rich protein-1 (PRP1) gene	tgatgtctacaacacacttgctagtattcctacttggagtggtgactctcaccactcccacatttggtacctatgagtcaccaaattatgggaaaccccctactcctgtattcaagcctcccaaggtgaaaccaccaccatatgaacctaagccaccagtgtatgaaccaccaaaaaaggagaagcctgaacctaagccaccggtttatgcacctccaaagaaagagaagcatggacccaaaccaccaatgtatgaacctccaaagaaggagaagcctgagccaaagccaccagtttatacacctccaaagaaagaggagcctaaacctaaaccaccagtatatgaacctccaaagaaggagaaacctgagccaaaaccaccgatttatacacctccaa…
CO000707	1000	17	Salicylic acid-induced fragment 1 protein	aagaaccaaaaaggggaagaactgagctaatggaaaaaagtgaaaagggtaatggttttgctcctgctacaaggtctccaatggctttaatggggtcatctagaaatgaaaaccaagaagtgaataccagcatgagaactgccgagaccatgctgcggttggtgcctatggctttaggggttgctgcacttgttgtcatgctcaaaaactcacagtccaatgactttggctccgtttcatactcagatcttggtgctttcaggtacttggtgcatgctaatggtatttgtgcaggctattcccttctttcagctattatagcagctgtgcctcgtccttctactatgcctagagcttggactttcttcctactcgatcagattctaacatacgtaatct…
CO000051	1023	15	ADP-Ribosylation factor	gagggaaagatcttctttcaaccacgcctgataaccgctcggatttttctcaggcaagtttctcactttctctctcaaagccaaaaaactttcatttctcaattaattttgctgtaattttctttcaacattttctctcccgatccgcctttgaattttaacttttattttatttcgaaagtgtgttaaaatcttttgaatcggtagatcttcgttcaaccacgcctaataaccgctcgggtttttctcagacgtgaaaaaaatggggctgtctttcaccaagctattcagccggctatttgccaaaaaggagatgcgtatactgatggttgggcttgatgctgctggtaaaaccaccattctttacaagctgaagttgggagagattgtcactactat…
CO000080	827	15	Translationally controlled tumor protein	tgtagccgccgcctgcgtctctctcttcatctctctgaaccaaaaagtctttagcttttcgcttcgagagagaccatgttggtttaccaggatctcatctccagtgacgagcttctttctgactcattcccctacaaggaaatcgagaatgggatgctgtgggaagttgagggaaagtgggttgtgcaaggagctattgatgttgacattggtgccaatccttcagccgaagatgctgatgaggatgaaggtgttgatgaccaatctgtgaaggttgttgacattgttgacactttcaggcttcaggagcaaccccctttcgacaagaagcagtttgtcgtgttcatgaagaagttcatcaagaacttgacaccgaaactggatgcggaaaagcaagag…
CO000159	1391	15	Expansin	tcagccaattgtttgagctagctagctcttactcaaatggcaaccaaaacgatgatgttgcaaatatttccacttttcttctttttgttcagtgtctgcaactccattttccttggtgctaatggagatgacaatggtggttggcaaactgcccatgccaccttctacggtggtgctgatgctaccggcacaatggggggagcttgtggttatggaaacctgtacagtcaagggtatggaacgagcacagcagctttgagcactgcacttttcaacaatggcttgagctgcggtgcctgctacgagctccggtgcaacaatgatcctcaatggtgcattagtcgaaccataaccgtgacagccaccaacttttgtccacctaactatgctttatctagt…
CO000402	1375	15	Exordium LIKE 3(EXL3)	agcagtcttgcattttgttttcccttttttttccccacactttttttaaaacccattagctaaaaatgcactgggttctttctgtgttgcttgcagttatcggagttactgcactgctcgttgtaactccggtaagtgggtaccgtccatggccgtacgtaaaacccaacagctccgacttaatgttcggaggctctaagaaatttgagggctcatcggagtttgtacatatgagatatcatatgggtccagtccttactgctcatatcaccatccacccaatctggtacggccggtggcagaaatcacagaagaaaatcatccgtgagttcatcaactcgatctccgccgttgattccaaacacccttcggtggctgggtggtggaagaccgtacagc…
CO000475	1260	15	UDP-L-Rhamnose synthase	aaccctgcattttcaacccaaaattttttttaaaaaaaattctaaataagtgatggggtttccggccaatggctcatcggacaagccattgaagttcctgatctacggtcgaactggttggatcggtggtttattaggcaaactctgcgaatcccagggaatcgattacgagtacggctccggccgtttggagagccggatttcgcttgagtccgacatagccaacgtgaaaccgacccatgtattcaatgccgccggtgtcaccggtcgtccgaacgtcgattggtgcgaatcccataaggtggagaccatcagaaccaatgtggtcgggacccttaccctcgctgacgtctgcagagacaaaggcctcatcttgattaattatgctacaggttgcat…
CO000125	1737	14	Translation elongation factor 1A-2	aaacaaatctcctaaagggtattttagaaaagataaagtaggcaaacctgagtacagaatagaacaagaggcttgctcgaaaacctatactctctgattatctctcttcttcgagccgctaggtcgtactgttttagcttcaagtctctcttttttgaaagttcctagttaatactacataatgggtaaggagaaggttcacatcaacattgttgtcattggccatgtcgactctgggaagtcaaccacaacgggtcacttgatctacaagcttggaggtattgacaagcgtgtgatcgagaggttcgagaaggaagctgctgagatgaacaaaaggtcattcaagtatgcctgggtgctcgacaagttgaaggctgagcgtgagcgtggtatcaccat…
CO000195	1327	14	Alpha tubulin 1	atcagcggcaaggaagacgctgccaacaacttcgctcgtggccaagcacaagtcaacgatctctttgccaatagtgtagtggccacgagcgaagttgttggcaaagagatcgttgacttgtgcttggaccgtatcaggaagcttgctgataactgtaccggccttcaaggtttccttgttttcaacgctgttggtggaggcactggatctggtcttggctccctccttttggagcgtttgtctgttgattatggcaagaaatccaagttgggtttcactgtcttcccatcaccccaggtctccacatctgttgttgagccctacaacagtgtcctctcaactcactcccttttggagcacactgatgtggctgttcttcttgacaatgaggctatctat…
CO000345	1854	14	3-Ketoacyl-CoA synthase	tccctcacacaaacaacaccttttttcaatagcttcatttccaccactgcaacaatgccacatttctctaattctgtcaagcttaagtatgtcaagcttggctaccaatatctcgtcaatcatattcttacacttactcttatacctgtcatggctggtgttcttattgaggttcttcgtttaggccctgctgagattgttaatctctggaattcccttcattttgatcttgttcaaatcttgtgctcttgtttctttattatctttgtagccactgtttacttcatgtctaagcctagaagcatttaccttgtggattatgcatgctacaaacctcctgtcacttgtcgtgttccttttgctactttcatggagcactcgaggctgaacttgagcaac…
CO000583	1093	14	Inorganic pyrophosphatase	ttcctttgctacttctctatttaaagcctcctataaggtgttatttctctattttagtgcctattatccttttattatttttgctctctctttgtttttgagatctgtgtgtttcttcaagcttcttgaaagcgtcattttggttgagaactggaaaccgctgctgtgatggctccaccaattgagactacagtcaagtcctctgactctcactgcgctccacatcctcctttgaatgaaaggatcctttcgtcaatgaccaggaggtccgtcgctgctcacccatggcatgatcttgaaattggacctggagctcctacggttttcaactgcgtgattgaaattgggaaagggagcaaggtgaaatatgaacttgacaagaaaactggtttgatcaag…
CO000105	1051	13	Harpin-induced 1	cacgcgtccgaaaagcaaattaacgccttttcttctctttgctgagctctctcccccaacatcaccatggcagataggatataccctaaacaagcgacaaatggcaccgccgccgcaaccaacccttcttttccagccactaaagcacaacaatacggagcctcccgccctgtctaccgtccacaacccgaacgccaccgctaccgccgctcttgctgttcttgctgcctttggaccaccatagctatcctcgttctcatcctcatagccgccgtagcttctgctatattgtacgtcctttaccgccctcaccgtcctactttcacagtttcctccctcaaaatctcggcacttaacgtaacctcagcttccaagctgatcaccaacatcaacctaaac…
CO000118	1111	13		tggctttcatgttttgggctctcattgtaactactctcacccttcaactagccattacgagtgcacaaacaccagctgcctcaccttccactacgccaaccaccaccaccaccactccaccttcaacttcaccaccacctacaacttccgcaccacctccttcaacaacccctccacctacaacttcagcaccacctccttcaacagcaacgcctccaccttccaccacgcccaccgcgccagctcaaccacctgcaacaactccccctcccactgttgcaccagctacaagcccaactgtcccaccgccacaaactccaccacctcaaccacctcaaactcctccaaccacagctccagctcaaccgccagcagtgccaccaccatcaccaccaccag…
CO000238	1583	13	E6	tgataggcaaacaaataatgatgtggaataaaagaaaaacattgcagacaatgaacgcattccattacataaaagtaaatcataaaattgtttatgccaaaaactacattgagaaactgcaaaacacttcttaaaaaggttaatgtaggcaccaaactgcaaaacaatttgatttcctactaaaaggaaatgttttaaaacctcatcacctattcctctactgcatctttgctttttttcttcttttttttcttttcacttttatcatcccctgcaccattaacagcaacaggagtctcctcgctctccttgctcttcttcttcttcttcttctcagacttctctgtatctggtgaagaagcttcaaccttatccttgttcttcttctttttttccttc…
CO000249	1244	13	Anthocyanidin reductase	agcagtccctagaaacaattaaaaagaagcaaaaaaaaaaaaaacacacacacacacacacacacagattaagacagaagcatggccagccagatcgtaggaacaaagaaagcttgtgtcgtgggtggcagcggattcgttgcgtcattgctggtcaagttgttgctcgagaagggttacgccgttaacactacagtcagggaccctgacaaccagaagaagatctctcaccttgtaacactacaagagttgggagacttgaaaatctttcaggcggatttaactgatgaagggagctttgatgcccctattgctggttgtgaccttgtcttccatgttgcgacacccgttaactttgcttctgaagatccagagaatgacatgatcaaaccagcgacc…
CO000270	1408	13	Translation elongation factor 1A-1	ttctgtttctggtcaagccaatctcaaaagactccccttttagctcacagctcctctcttgagtactataatgggtaaggagaaggttcacatcaacattgtggtcattggccatgtcgactctgggaagtctacaaccactggtcatttgatctacaagcttggtggtattgacaagcgtgtgattgagaggtttgagaaggaggctgctgagatgaacaaaaggtcatttaagtatgcatgggtgcttgacaagcttaaggccgagcgtgaacgtggtattaccatcgatattgccctctggaagtttgagactaccaaatactactgtactgtcattgatgcccctggacatcgtgacttcatcaagaacatgattactggtacctcacaggctga…
CO000612	944	13	Benzoquinone reductase	attttttaaaaagagtatatttttggtggagattttcagaggaattcatccatggcaaccaaagtgtatattgtatactattccatgtacggacacgtagaaaaacttgcagaggaaataaggaaaggggctgcatctgttgaaggtgttgaagccaaattatggcaggtctctgagactctatcggaagaagttcttggaaagatgagtgcacctccaaaaagtgatgtaccagttattacaccgaacgatcttgctgaggccgatgggtttgtttttggtttcccaacaagattcggaatgatgtccgcacaattcaaagcttttctggatgcaaccggaggtctatggagaactcagcaacttgcaggaaaacctgctgggatcttctatagcacc…
CO000677	1187	13	Translation elongation factor 1A-2	gactagttcttcattttcattttcttgttccttccttcgccgtctattgctttttgttacctcgatttcaagtgaatcagaatgggtaaggaaaagactcacattaacattgtggtcatcggccacgtcgattctgggaaatcaaccaccactggccacctgatttacaagcttggtggtattgacaagcgtgtgattgaaaggttcgagaaagaagctgctgagatgaacaagaggtcattcaagtatgcttgggtgcttgacaagctcaaggctgagcgtgagcgtggtatcaccattgatattgccttgtggaaatttgagaccaccaaatactactgcactgtgattgatgcacctggacaccgtgactttatcaagaatatgattactggtacg…
CO000086	957	12	Auxin binding protein	ataccttcaaggtttaaatggctcaaaagatccatgcttttcgctctatataaagggtgacctcagcttgcaacatcattttcacccctcaaaaaccagtgccataaacatgtttctcccaatctttttcattttctctttcctattttcctccaccaacgcagccgacttctgtgttgggggcttgaatggccctgtaggccctgcaggctattcttgcaagaagacagccaccgaagatgacttctctttctccggcctccgtaccgcaggcaacacttcgaacctcgtaaaagctgcaataacaccagccttttcgactcaattcccgggtgttaacggactcggcatttcaatagctcgtttggatttagctgttggtggagtgatacctatgca…
CO000103	1723	12	Taxadien-5-Alpha-Ol O-acetyltransferase	aaaacagttgcattgctgctgatactttctcttgattcttattctcagttgtgatttaggtttggtattcaaatggcggatattagcaatggtaccaaaggttttgcagtgaaacaaggagaaccaactcgggtccttcctgcagaagagacaaagaagggtctttattacctgggaaaccttgaccaaaacattgcagtcataattcgaaccatttacttctttaagtcagagtctaaagggaatgaagatgctgccgaacaagttaaaaatggtttgtcaaagattcttgttcatcatcatccacttgctgggcgactaaccatcagctccgaagggaagctcatagtggactgcaccggcgagggggctgtttttgtggaggctgaagctaattgt…
CO000104	1616	12	AE9 stearoyl-ACP desaturase	gggaatcaggtaaggttttccagaacaaaaatcaaagcccaataaccaaaaagggaaaaaatggctttgaattttaatcccatcgcctcgaaatctcagaagctcccttgctttgctcttccaccaaaggccaccctcagatctcccaagttttccatgatctccaccattccttctggctccaaagaggttgggaatctgaaaaagcctttcacgcctccaaaggaggtgcctgttcagatcacccactccatgccgcctcacaagattgagatctttaaatctttggagggctgggctgagaacaacattctgactcacctcaaaccagttgagaaatgttggcaacccgccgactttcttccagatcctaattctgatggatttcatgagcaagtc…
CO000109	1574	12	Pectate lyase	cttgcctcacaaaacaagcaaacaaaggtaaaatggcaaggacaatggcaatggcgatcccttcacttcctcttctcttcctctttacatttctgcttctactcccacttctcatttcctcttcccctgttcaagaccctgagcttgttgtccaagatgttcacagggctatcaatgcgtccaggaggaacctagggtatctctcctgtggaaccggaaaccccattgatgactgctggagatgtgaccccaactgggagactaatcgccagaagctagctgattgtgccattggattcggcaagaacgccattggtggaagagatggtaagatttatgtggtcactgactccggcgatgatgaccccgttaaccccaaaccagggacattacggcatg…
CO000194	1181	12	Protodermal factor	tttgctgttgaagtagtaatatctatagcagacggagatggagaggcaaagaagcaagcaggttcgtttgttgatgcgggttttggttgctgccttgttctcccacaacatggtcattgcagtgacctccactggccttggagagcagaaaaattactatccagttcctgaccctcatgctggaactcccccttcaggttcacatggcacaccaccatcttcaggaggtggaacacctccctctcatggaaccccatcacatggaggtggttaccacccttcaccaacaccatcaacgccttcgggtggaaattgtggaactccaccacatgacccttcaactccatcaacaccatcacacactccttcgcatggtactccaccatcatctggaggtgg…
CO000230	1332	12	Spotp9 malate dehydrogenase	tctgctcgaaatcttcttcattctcactctctctccactgaactcttgctaaacggtatcgttttagtcagtctttcatcaatggcgaaagaaccagttcgcgtcctcgttactggagctgcaggacaaatcgggtatgctcttgtacccatgattgctaggggagtcatgttgggtgctgaccagcccgtgatccttcacatgcttgatatcccacctgctgcggaggctttgaatggtgtcaaaatggagttggtggatgctgcttttcctcttctaaagggtgttgttgctacaactgatgttgttgaggcatgcactggagtcaatgttgctgtcatggttggtggtttcccaaggaaggaaggaatggagaggaaagatgttatgtcaaagaat…
CO000259	573	12	Fiber protein Fb7	catatttctttgctgctttactaactaaaaagaaaaacctttctttgtttaacgcttaagattcctttaacaacaatggctccctcaatgtctactctaatggttgttctcgtcgctgtatgcgctctcatgggttccgccattgccgccgacgctccggctccgagccccacctctggtgccggctctatctcgccgccatttgtctctgtttccgtcgccgctgccgctatggctctgcttttcggatctagacttcggatctgaatgatgctatctctggtgttcagatgatgctctgtttttcttttatatatgtattctttttctttttgatttgattttgaatttggtttgcaattttagtagctgtggtagtggatctagggagtgattata…
CO000351	212	12	ubiquinone/menaquinone biosynthesis methyltransferase	ttcccgggtcgacactttcgaatccggcatcctgcatcatggctttcagggtatcctgatcgggatgcatacggatggattctgccagataacggtagctgtcggcgtcgttcgcgaccagtgagccaatacgcggcagcacatggaaggagtatgcatcataggctttgctcagcggctcgataattggcttcgagaactcaagcaccagc
CO000362	1209	12	Annexin	aatggccactcttacagtgccattgcttcttcttcctttatttctttcagaatcagaatagaaataaaggaagaagaagcaatggccactcttacagtgcccacgacagttccttcagtgtctgaagattgtgaacaactaagaaaagccttttcaggatggggaactaatgagggcttaatcatagatatattgggtcacagaaatgccgagcaacgaaacttgattcgaaaaacctacgctgaaacctatggagaggatctcctcaaggcactagacaaggagctctcgaatgactttgagaggctggttttgctttgggctcttgatcctgctgaacgtgatgcccttttggctaatgaagccaccaaaaggtggacttcaagcaatcaggtcctt…
CO000446	1960	12	Fasciclin-Like arabinogalactan protein 15	agactttctccagagagagaaaaaagaattcttctctcttcctggtttataatatcccccattttgtcaattccatattagatttttattcttcagtaatggctttcatgttcttcaactctcttcttcttcttcttcttcaaatctcatgttctagattctcattggcattgcaagagaactcatcagccacggtccgctcgggtcagatcaattccaactcagtcctggtggctttgttagactcgcattacactgagcttgccgagttggtggagaaagctttgttgttgcagacccttgaggaaactgtcggaaaacacaatatcaccattttcgctcctaaaaatgaagctcttgagcgggatctcgaccctgagttcaagcggtttttgcttg…
CO000579	2151	12	3-Ketoacyl-CoA synthase	cacgcgtccgctttttcttatcttcttaattatttctctatctcttgcaatatgcctccagcctcgcccgatttctccagctctgtcaagcttaagtatgttaagcttggctaccaatacgttgtggatcattttcttactctcttgttggttcctgtcatggttggtatccttattgaagttgttcgtttaggccctcaagagattgttaacctatggaactccctccattttgatcttattcagatattgtgctcttctttcttcatcatttttattgccactgtttacttcatgtccaagccacgatgcatctaccttgtggattatgcatgctacaagcctcctgtgacttgcagggttccttttgctactttcatggagcactccaggttgatt…
CO000684	919	12	Profilin	cccgggtcgacccacgcgtccgcggacgcgtgggcggacgcgtgggcggacgcgtgggcggacgcgtgggcggacgcgtgggcggacgcgtgggcggacgcgtgggatactttcttggtcttcatttgttttcctccaaaaggaacaacagagaagaaaacttcatcaaacaaggaaaaaacttgaagtaaaacaattgagagaagatgtcgtggcaagcgtatgtcgatgatcacttgatgtgtgatatcgagggcaaccatctctctgccgccgctatcattggccaagacggcagcgtttgggcccagagctccaatttccctcagttcaagccagaagaaatcactggcatcatgaatgactttgctgaacctggatcgcttgctccgactggat…
CO000042	664	11		aattacaaacagtgagtgagtgagtgagagagagaggagtgtgctatttgctaaggtgcagtttggagtggttttcataatggaaagaggtgcaaggatgctgttgatctcagtcatggtcctgctggtccttgcttcaaatgctgaagggagaagactcaaagaggaagcttaccaccctcagaacttcctcggagcctttggtactagtggcgggctagttccaacccctggtggaggtgttggccttaatttagggccatcagtcttttgttcctatcctgggaccggatgtgttcgtgtccagcctactatccctggtagtactggtaccattggcgctggcacaccaccatgatagatgtcctgattcaggcttagagggtgttgaatgagctt…
CO000049	1838	11	S-Adenosylmethionine decarboxylase	tgcgagaagtgagaaactattgtaaacctctcataatattctgagcttttttctctttttgtttcctataattttgatctgagccaaggttgataatcgagtttttataagcggttgatcctggcattccaaaatttgaattgtgtggctgaatgatctatggagactaagggagggaaaaagaagtctagtagtagtaagtcattattctacgaagctcctctcggttacagcattgaagacgttcgaccaaacggtggaatcaagaagttcagatctgctgcttactccaactgcgctcgcaaaccatcctgatattcgtaacgcaagtgcgcccttctgaccactgttaaagtggtcaatttatttttatttgctttattacttagtattagtatc…
CO000165	1089	11		aaaaacaaaggtatatgcagatcaaaattcagagtaaaagatcgacgatgagcggcttttgctcggcgatggcaatgacgatgacgatcgtcttcttcttcttgttccttcagcaaactccattaatggcggtggcggcgaaactcgaagaagatcatttcatcattaagaataagccaacgctgtacgagttttcaagcagagatgagatggtgcatttggcaggatacggcgaagagaagctctcgaccgttctcgtcaccggaactgttctttgtgaagcttgccaccaacgccgccgccgcgatccacaacctcaacttcgttcatggcctatatcaggggctttggtgtctgttaaatgtgaaactccttgtaagaccaaatcaggtacaacac…
CO000190	896	11	Fiber protein fb34	agaagaagaaaaaaataaagcagaagatattgttgggttattgaagctagctagctccacattttctatggcttcaaagcttcttttgattgctgtctttgttcttgatctcattgcttttggtttagctgtggcagctgagcaaagaagaagcactgccaagattgtccaagacagtgaagttaattataactattgtgtctatgactcagacatatcaacaggctatggtgttggtgcatttttgttccttatggttagccaagcccttgtaatggctgcaagcaaatgcttctgctgtggaaagggtttaaaccccagtggttcaagggcctgggcagtcatccttttcatagtctgctggttgtttttcctgattgctgagatatgcttgctggc…
CO000231	919	11	H6-Like protein	tttctcatttcacacgggttgtggcgtagtttaagcagagagggtgcgcaggataaagctattcaccattgtttcaacatgaaggtttgtaataaaaatttgtttctatcagcattgctttgcattgctgttgcaggagttttgggtcaagctcctagtaatcctcctacgtctacgccggcgccacccacaccaccggcttctactcctcctccgacgactcaagcaccgcctacaccaaccgccactccgccaccggtttctactcctcctcccacttcatcaccgcccccagtgacagcttctccacccccagtttcaactcctccacccagttctcctcctcctgcaactccaccacctgcttctcctcctcctgcaactccacctccagcttct…
CO000290	1800	11	S-Adenosyl-L-Homocystein hydrolase	gtgatctgttcttattcactccattcctttaacccatggctctttccgtcgagaaaaccgccgccggccgcgagtacaaggtcaaggacatgtctcaggctgacttcggtcgtctcgagatcgagttggccgaggtcgaaatgcccggtctcatggcttgccgagccgagttcggccctgcccaacctttcaagggagccaaaatcaccggttctcttcacatgaccatccagaccgccgtcctcatcgaaaccctcaccgccctcggagctgaagtccgttggtgctcttgcaatatcttctctacccaagaccatgccgccgccgccattgcccgtgactcggcagccgtgttcgcctggaaaggtgagaccctccaggaatactggtggtgtaccg…
CO000315	1123	11	Thaumatin-Like protein(TLP1)	caattctccttgcatcaagtcactctaaatccttcccattttcttctcaaatctctgcttcttcacaaagcagtaatggcgatttcctctgggatttatcttctttttctactgaatttcttctcatttgggacgatattttcttcagcaacaagctttacactcgaaaatcgttgtagtttcacagtatggcctggttccctgaccgcaaatggccctccccttggtgatggtggttttgtattggctcctggttcatcatcccgactccagcctccacctggttggtctggtcgcttttggggtcgaactggctgcaatttcgataactctggctcaggcaaatgtgtaaccggtgactgtggtggcgcgttaaaatgcaacggcggtggcatccca…
CO000575	886	11	Lipid transfer protein	cttgaaagatataaaacttgtagttggttacctacaacagccatcattgcatagtttccccctataaaagcctcacagttccgccatcactacgattacagcagcgaaagggaagatggcaacatatcttgtattggttgtagtagctatgctttgtgcaggagccacagctcaatcaggttgcactaatgtgttgatcggcatgtcaccctgtttgaattacattacagggtcctcatcaaccccatctcaacaatgttgcacgcagctagctaatgtcgtgcgttcatcaccgagatgcttgtgtcaggtccttaatggtggtggttcatcatttgggatcaacatcaaccagactcaagctttggccttacctgattcatgcaatgttcagactcc…
CO000654	1621	11	Aspartyl protease family protein	cccacgcgtccgtttgttgttgttgttgtcatggcttctctgcctttcatcttcttcttatctttctttataatctccacaacattgatgtcagccggcgccgccgccgccaccatcaaactctccctctctcccttccctcacccttcttcctcccatccttaccaaattctcaacaacttagtcacttcttctgttgcaagagcccaccacctcaaacatcccaaagccaaggccgataatactacctcttctcttctcagggctcccctattttctcacagttatgggggctacactatctccctcaaatttggaactccgcctcaaacccttcctttcgtcatggacaccgggagcagcctctcctggttcccttgcacctctcgttacctttgt…
CO000674	1620	11	GDP-Dissociation inhibitor	ctcgtcgttgaagcgaaagcttatctcttttcgtctctgaatctgatcaatcaacacctgaaaaggaaaacttacaaacaacaactactactagtctactacccagcactagaagcagctcgtagccagccatggatgaagagtacgatgtcatagttctaggaactggtctcaaggaatgcatcctcagcggtcttctttctgttgacggactcaaggttctgcatatggataggaatgattactatggaggagagtctacatcactcaacctcattcagctctggaagaagtttagaggaaatgataagcctcctgctcatttgggctctagcagagattataatgtggacatggtccctaagtttatgatggcaaatggcactcttgtgcgtgttc…
CO000002	1157	10	Cytosolic ascorbate peroxidase	gtggtttaagggatttttttcattcgtttcttctcacgctcgattaccttacgaaaagagaaaatgaccaagtgttacccaactgtgagcgaggaataccagaagtcagttgaaaaggccaagaggaagctcagaggtctcatcgctgagaagaactgtgctccactcatgctccgtttagcgtggcactcagctggaacttttgatgttaagaccaagaccggaggtccattcggaaccatgaagcatcctgctgagctcgcacatgctgctaacaacggcctagatatcgccgtcagacttctcgagccgatcaaggagcagttccctaacctcacctacgctgacttctatcagcttgctggtgtcgttgccgttgagattactggtggacctgaa…
CO000014	916	10	Chalcone isomerase-like protein (CHIL2)	tcaaccatctttgccctttcattgcttccttgcctgccttaaacctccttcaagcatagccatgactactgaaatgataatggttgatgaagtcccttttcctccacaaatcacaactaccaagccactatctcttttgggtcatggaattaccgacattgagattcactttttgcaaatcaagttcacagcaattggggtttaccttgaacctgaagttgtagggcatttacaacaatggaagggtaagcctgggaacgtgctagctgaagatgataacttcttcgaggctcttattaatgctccagtggagaagtttctgagagttgtggtgattaaggagatcaaaggttcccaatatggagtgcagctagagagtgctgtgagggaccgattggc…
CO000016	1744	10	Dnaj_C chaperone protein	gatctggaccgtccattttcaccccatataactcgatctctggccacccattaccccctctctctttctgcctcactcgccgtctcgcctctcgcttattggttcaagatctgttagttttcttctttaaatctctgatcttctttcttatgatctgaaattttttttttgggttttattgaattttcattctggctttttctggttttgatctgatcagatcgtataaaaatatcaaaacatgtttgggagagcaccgaagaaaagcgataattccaaatactatgagattttgggagtatcgaaaaacgcttcccaagatgatctaaagaaagcttatagaaaagccgctattaagaatcatcccgataaaggcggcgatcctgaaaagtttaaaga…
CO000041	1464	10	Cytosolic phosphoglycerate kinase 1	tcccattttcttattgattttgcagatcggttctctaatccttttttcgggtgtagcgttgtttatacttttggttgttgttgaagaagtgctactaccatggctacaaagaagagcgttggggacttgaaggaagctgatttgaagggaaagaaagtgtttgttagagtcgatctgaacgttccattggatgataacttcaacataactgatgacacaaggatccgtgccgctgttcccaccatcaagtatttgatgggtcatggctctaaagtcatcctctctagtcatttgggacgcccaaagggtgtcactcccaagtacagtttgaagcctcttgtgccaaggttatctgaactccttggagtcgaggttaaaatggcaaatgactgtattggt…
CO000043	1319	10	Glyceraldehyde-3-Phosphate dehydrogenase	ctcactccgccaccttcaataatttcttccgttgatctttgttagagattagctttttaatttttcattatgggaaagatcaagatcggaatcaatggatttggaaggatcgggcgtttggttgcgagagttgctctccaaagcgatgatattgagctcgttgctgttaacgatcctttcatcaccactgaatacatgacgtacatgtttaagtacgacagtgttcacggtcaatggaagcatcatgagcttaaggtgaaggactcaaagacccttctctttggtgaaaagcctgtcacagttttcggtatcagaaaccctgaggaaatcccatgggctgaggctggagctgagtatgttgttgagtctactggtgtttttactgacaaggacaaggct…
CO000131	352	10		aaaaatgcataatccaccaccaccagacccccaccacccacatccgcaaccccatgctccgcctccaggtccgccacatgctgatcatcctcctccaggccatgctcctcctcctgggccaggcccccatgcgccaccgccaggaccaggtggtccaggtcatcatcccgagccacacaagcctcgtccatgatccttataccgtgaatacaatattatgtaagcttaggctgggtaccgtacttatgtaataaattaagaaaacctatttctactataataataataaagatgtaatttctacgttatggaggccatggcttatatgggcacttttatttttgcttaaaaa
CO000198	1274	10	dTDP-Glucose 4,6-Dehydratase	gtgttgtttggctttgttttccttgtaggatctgaaaaagaatgtcggcaaatggaactgacaactcaacttctaagaagcctccaagtccttctcctttgagattttccaagttttttcagtccaacatgagaattcttgttactggtggagctggattcattggctcccatttagtggataaattgatggagaatgaaaagaatgaggttattgtcgtcgacaactactttaccggcacaaaggacaatctcaagaaatggattggacatccgagattcgagcttattcgtcacgatgtcaccgagccgttgctcattgaggttgatcagatctaccatcttgcttgcccggcttcgccaatcttttacaaatacaatcctgttaagacaataaaga…
CO000329	1324	10	Papain-Like cysteine proteinase	gaaaaagaacagcaaaaaaatggctcatcgtatagcgttttctgtgtgtgtcgtttcgtattttttattcatcggtttgatatcgtcggaggctttctcggtcgtcggatcagaagttgatccgttgatcaggcaagtaacggacggtcaagatgatggagtggagacacagcctttgaccgctgagcatcacttctcgctgttcaaggctcggttcaagaaatcgtacggctcggaggaggagcatgattaccggttcaaggttttccgggcgaacttgagacgagcggcgcgtcatcagaagcttgacccgtccgcgactcacggtgtgactcagttctccgatttgactcccggtgagttcaggaagaggtttttggggttaaggaggttgagact…
CO000374	1254	10	nodulin MtN3 family protein	gcaaaagcctctaagctagagagtgtgtgtgagaaaatagcagctagggttcctctctccctctccaaaaactaaacaacaaaacaaaagagagatggcagtaatggcggatcaccattccctggctgttgtttttggtatattaggtaacatcatctcagtcctcgtatttctggcaccagtgccaacattctgtcggatttacaaaaagaaatcgactgagagtttccagtcactgccataccaggttgcattgttcagttgcatgctatggctgtattacgcgttgattaaaaagggtgctttccttctgatcaccatcaactcttttggatgtgttgttgagactatttatatatctatgttctgggcttatgcttcaaagaatagcaggatgtc…
CO000625	770	10	SP1	tctgttttttccgctttatgctctaacaacatggcgttatgcattcgcgatattttttccgctttatgctttgacatggtgttatgcattccgggtaaagaacaaccaatcaaacaggttgcttagaagtcccaagttagagaacatgggtcgtggagtcagcagtggtgggggacagagttctttgggttaccttttcgggagcggagaagctccacctccaaaaccaaccaacgtcacgagtactggcaccaccagtaatgaagttcctcagaagcagattgaggttgtgaaggaaactgtgcaaaaaccgaccactgcttcaccatcatcgggtgatgccaaggagatccctgcaggtgttccagggagcaaaacgaacaactatttccgagctga…
CO000653	1537	10	Cysteine protease	accccgttgaaaaaatatgggtttccaaagaaacatattgggtttccttttcttgatattggcttcactaacaagcctctcttctagccttcctagtgaatactccatagtggaacatgagattgacgcatttctttcggaggaaagggtgttggagatcttccaacagtggaaagaaaagaatcagaaagtgtaccggcacgccgaggaggctgagaaaaggtttgaaaatttcaaggggaatttgaagtatatcctagagaggaatgcaaagagaaaagcaaacaaatgggaacatcatgtgggattgaacaagtttgctgatatgagcaatgaggagttcagaaaagcttacttgtcaaaggtgaaaaagcccatcaacaaagggataaccctgtc…
CO000657	1765	10	18S ribosomal RNA gene	agaagagtttgatcctggctcagaaggaacgctagctatatgcttaacacatgcaagtcgaacgttgttttcggggagctaggaagaaggaaaagaggctcctagctaaaggtagcttgtctcgcccagggggtgagaactgttgagaacaaagtggcgaacgggtgcgtaacgcgtgggaatctgccgaacagttcgggccaaatcctgaagaaagctaaaaagcgctgtttgatgagcctgcgtagtattaggtagttggtcaggtaaaggctgaccaagccaatgatgcttagctggtcttttcggatgatcagccacactgggactgagacacggcccggactcccacggggggcagcagtggggaatcttggacaatgggcgaaagcccgatcc…
CO000691	1073	10	ADP ribosylation factor	ctggacgacagttcctttgattttgagagaaaagagagagagagaaaagagtagatcttggcttctctccttcgttcgattccgcttaattatagcccgcgtttctctcagacgtgaaaaatggggctgtctttcacaaagctatttagccggcttttcgccaagaaggagatgcgtatactcatggttgggcttgatgctgctggtaaaactaccattctttacaagcttaagttgggagagattgtcactaccattcccaccatcggtttcaatgttgagaccgttgaatacaagaacatcagctttactgtttgggatgttggtggccaggacaagatccgaccattgtggagacactacttccaaaacacccaaggacttatttttgtggttgat…
CO000721	1037	10	Membrane protein	tttttgtacttttcattctttataataatatatcacatagtatattgggcatgaaattttactccacaaaatagtttatttttaaaattttaaattatatggcaaatatcaggccactttgatggtaaaaaaagaaaaaagaggcagaaatttagagaagttgattcaaacagaaagggtgatggaactgagcattcagaaaacagaagccttgattaggctgagtacgatagtgatgctggttttaacagcttgtttaattgggttggattctcaaacaaaggtcatcttctacgttcaaaagaaagcttctttcaaggatttgcgtgctcttgttggattgctgtatatcacatcattggctgctgcttataatctacttcaactatgctgttcttc…
CO000793	631	10	40s ribosomal protein S30	attctctgctcaccgccataagcgaaatcaaaagccagcagcgcagcagctaaaagagcagtcttttgacaattattcgccatgggtaaggttcacggatctctagctcgtgccgggaaggtgagaggccaaactcctaaagtggccaagcaagacaagaagaagaagccccgtggccgcgcttacaagcggatgcaatacaaccgacgcttcgtcaccgcagtggttggatttggcaaaaagaggggacctaactcatctgagaagtaagagatctatgtaggtgaagaaggcaagaagccttgttgaaagctttgatggattttaagtctttgttttcttttgataatgtttttatgatattggtttcagggattggattgaactgccattttgttt…
CO000942	1528	10	Actin	acctccactgcagcaggagcagagggaaaaaggataaaagcatcgtcgtgttctcgcttcttcaactctgtctctacgtctctgaacctcctcctttcgttcttttcttattcagtattgtaaaagatggccgatgctgaggatattcaacccctcgtctgtgacaatggaactggaatggtgaaggctggttttgctggtgatgatgctcccagggctgtttttcccagtattgttggtcgaccccgacacactggtgtcatggttgggatgggtcagaaggatgcctatgtaggagatgaagcacaatccaaaagaggtattcttactttgaaatatcccattgagcatgggatcgtcagcaactgggatgatatggaaaagatctggcatcataca…
CO001027	1651	10	Cellulose synthase	aaagatttgatggcatagataggagtgatcgatatgccaataggaacacagttttctttgatgttaacatgaaaggtcttgatggaatccaagggccagtttatgtgggaacaggttgtgttttcaataggcaagcactttatggctatggtccaccttcaatgccaagttttcccaagtcatcctcctcatcttgctcgtgttgctgcccaggcaagaaggaacctaaagatccatcagagctttatagggatgcaaaacgggaagaacttgatgctgccatctttaaccttagggaaattgacaattatgatgagtatgaaagatcaatgttgatctctcaaacaagctttgagaaaacttttggcttatcttcagtcttcattgaatctacactaa…
