# Supplementary material for: Generation, Annotation and Analysis of First Large-Scale Expressed Sequence Tags from Developing Fiber of Gossypium barbadense L
Source: PLoS One. 2011 Jul 28;6(7):e22758. doi: 10.1371/journal.pone.0022758 (PMC3145671; doi:10.1371/journal.pone.0022758)
Supplement: Table S4 — Details of best blastx hits against nr with E-value≤10−5. The 5852 unique sequences were used in a blastx search against the non-redundant protein sequence (nr) database in GenBank. A total of 4862 (83.1%) unigenes had significant hits (E-value≤10−5). (XLS) [file pone.0022758.s008.xls]

## Sheet: TableS4_Hits
Query	Q_Length	S_NO.	S_Description	S_Organism	S_Length	Score	E_Value	Identities	Positives	Frame
CO000001	708	ABB16985.1	profilin-like protein	Solanum tuberosum	131	215	3e-54	0.77	0.86	1
CO000002	1157	ABR18607.1	cytosolic ascorbate peroxidase 1	Gossypium hirsutum	250	449	e-124	0.88	0.88	1
CO000003	987	EEF49271.1	Membrane protein PB1A10.07c, putative	Ricinus communis	413	449	e-124	0.78	0.85	1
CO000004	1204	XP_002281552.1	PREDICTED: hypothetical protein	Vitis vinifera	1349	583	e-164	0.84	0.92	1
CO000005	1055	AAR13288.1	Anx1	Gossypium hirsutum	316	587	e-166	0.95	0.95	3
CO000006	669	CAE75667.1	high-glycine tyrosine keratin-like protein	Gossypium hirsutum	101	208	4e-52	0.97	0.97	3
CO000007	1057	EEF37225.1	ubiquitin-conjugating enzyme m, putative	Ricinus communis	183	369	e-100	0.94	0.98	2
CO000008	820	XP_002319495.1	predicted protein	Populus trichocarpa	215	253	2e-65	0.59	0.72	2
CO000009	1202	AAA79366.1	unknown	Gossypium hirsutum	263	409	e-112	0.82	0.82	2
CO000010	1091	XP_002315028.1	predicted protein	Populus trichocarpa	422	521	e-146	0.81	0.84	1
CO000011	697	XP_002301918.1	high mobility group family	Populus trichocarpa	152	150	1e-34	0.92	0.93	2
CO000012	1044	EEF50731.1	6-phosphogluconolactonase, putative	Ricinus communis	266	443	e-122	0.87	0.93	1
CO000013	1807	Q6VAG0.1	Tubulin alpha-2 chain	Gossypium hirsutum	450	840	0	0.96	0.96	2
CO000014	916	XP_002325926.1	chalcone isomerase-like protein	Populus trichocarpa	210	316	2e-84	0.77	0.83	2
CO000015	962	AAX07458.2	ethylene-responsive element binding protein ERF2	Gossypium hirsutum	390	471	e-131	0.83	0.84	3
CO000016	1744	XP_002263156.1	PREDICTED: hypothetical protein	Vitis vinifera	416	688	0	0.81	0.84	2
CO000017	1296	AAQ56598.1	chitinase-like protein	Gossypium hirsutum	318	654	0	0.98	0.99	1
CO000018	750	XP_002285353.1	PREDICTED: hypothetical protein isoform 2	Vitis vinifera	170	252	2e-65	0.76	0.87	1
CO000019	757	XP_002316317.1	predicted protein	Populus trichocarpa	212	355	2e-96	0.8	0.9	2
CO000020	3214	BAB33421.1	putative senescence-associated protein	Pisum sativum	282	342	2e-91	0.64	0.7	-2
CO000021	1108	ACB42441.1	aquaporin PIP2;4	Gossypium hirsutum	278	532	e-149	0.94	0.96	1
CO000022	789	ABD66505.1	actin depolymerizing factor 3	Gossypium hirsutum	139	281	4e-74	1	1	2
CO000023	1643	XP_002324315.1	predicted protein	Populus trichocarpa	362	650	0	0.85	0.91	1
CO000024	1774	XP_002277003.1	PREDICTED: hypothetical protein	Vitis vinifera	479	749	0	0.81	0.88	1
CO000025	849	B9RT03.1	membrane protein	Ricinus communis	201	153	2e-35	0.41	0.53	2
CO000026	1207	ABL86674.1	PDF	Gossypium barbadense	294	204	2e-50	0.88	0.88	3
CO000027	838	ABL86677.1	GLP3	Gossypium barbadense	205	384	e-105	1	1	1
CO000028	676	EEF32936.1	conserved hypothetical protein	Ricinus communis	99	181	4e-44	0.94	0.95	1
CO000029	1452	CAE54307.1	cysteine proteinase	Gossypium hirsutum	372	722	0	0.97	0.97	3
CO000030	660	XP_002274855.1	PREDICTED: hypothetical protein	Vitis vinifera	239	157	1e-36	0.67	0.82	1
CO000031	963	EEF37134.1	conserved hypothetical protein	Ricinus communis	247	374	e-102	0.78	0.86	1
CO000032	1003	XP_002270904.1	PREDICTED: hypothetical protein isoform 1	Vitis vinifera	630	293	2e-77	0.68	0.78	2
CO000033	905	EEF38509.1	Vacuolar protein sorting-associated protein VPS4, putative	Ricinuscommunis	431	387	e-105	0.89	0.91	2
CO000034	722	EEF49984.1	conserved hypothetical protein	Ricinus communis	168	249	1e-64	0.75	0.87	1
CO000035	771	AAO61854.1	glutathione S-transferase U1	Malva pusilla	219	365	3e-99	0.79	0.88	3
CO000036	1318	XP_002272669.1	PREDICTED: hypothetical protein	Vitis vinifera	341	630	e-179	0.9	0.95	1
CO000037	828	EEF45778.1	conserved hypothetical protein	Ricinus communis	272	261	6e-68	0.61	0.77	3
CO000038	874	AAF29773.1	glutathione S-transferase	Gossypium hirsutum	281	469	e-130	0.97	0.98	1
CO000039	1067	ABV27477.1	fasciclin-like arabinogalactan protein 6	Gossypium hirsutum	241	365	6e-99	0.83	0.83	3
CO000040	640	EEF50364.1	40S ribosomal protein S13, putative	Ricinus communis	151	165	3e-39	0.98	1	1
CO000041	1464	BAA33801.1	cytosolic phosphoglycerate kinase 1	Populus nigra	401	700	0	0.88	0.94	1
CO000043	1319	NP_001053139.1	Os04g0486600	Oryza sativa (japonica cultivar-group)	337	560	e-157	0.87	0.92	1
CO000044	270	AAG29777.1	lipid transfer protein 3 precursor	Gossypium hirsutum	120	77.4	4e-13	0.97	1	-3
CO000045	276	BAE98425.1	hypothetical protein	Arabidopsis thaliana	80	102	2e-20	0.88	0.94	1
CO000046	1472	A7L2Z6.1	S-adenosylmethionine synthetase	Gossypium hirsutum	393	763	0	0.95	0.95	2
CO000047	1021	ACN54323.1	NADPH:cytochrome P450 reductase	Gossypium hirsutum	693	586	e-165	0.84	0.89	2
CO000048	943	XP_002317648.1	actin 6	Populus trichocarpa	367	501	e-140	0.98	0.99	1
CO000049	1838	AAL89723.1	S-adenosylmethionine decarboxylase	Glycine max	355	458	e-127	0.68	0.74	3
CO000050	471	ABB62640.1	putative heat shock protein	Shigella dysenteriae Sd197	328	329	5e-89	0.98	0.98	1
CO000051	1023	XP_002302788.1	predicted protein	Populus trichocarpa	181	366	2e-99	1	1	2
CO000052	744	ACJ86246.1	unknown	Medicago truncatula	146	291	3e-77	0.93	0.95	3
CO000053	853	AAM62634.1	lipid transfer protein, putative	Arabidopsis thaliana	193	154	1e-35	0.66	0.83	2
CO000054	543	ABO47738.1	alpha-tubulin	Gossypium hirsutum	449	135	1e-30	0.98	0.98	2
CO000055	1112	ABR18607.1	cytosolic ascorbate peroxidase 1	Gossypium hirsutum	250	448	e-124	0.87	0.91	3
CO000056	1047	ABR68799.1	fasciclin-like arabinogalactan protein 1	Gossypium hirsutum	244	384	e-104	0.87	0.87	2
CO000057	1158	EEF50419.1	calcium lipid binding protein, putative	Ricinus communis	515	494	e-138	0.83	0.95	3
CO000058	802	ABK96569.1	unknown	Populus trichocarpa x Populus deltoides	158	270	9e-71	0.85	0.9	2
CO000059	1171	EEF44994.1	caspase, putative	Ricinus communis	325	298	6e-79	0.5	0.67	1
CO000060	629	XP_002272119.1	PREDICTED: hypothetical protein	Vitis vinifera	365	249	1e-64	0.82	0.92	-2
CO000061	1775	CAC86383.1	carboxypeptidase type III	Theobroma cacao	508	897	0	0.85	0.91	3
CO000062	797	XP_002306888.1	predicted protein	Populus trichocarpa	155	157	1e-36	0.61	0.73	2
CO000063	614	XP_002312562.1	beta-ketoacyl-coa synthase family protein	Populus trichocarpa	520	224	3e-57	0.92	0.98	1
CO000064	2445	AAQ08018.1	endo-1,4-beta-glucanase	Gossypium hirsutum	619	1160	0	0.92	0.92	1
CO000065	176	YP_002872603.1	putative two-component sensor histidine kinase	Pseudomonas fluorescens SBW25	556	100	6e-20	0.87	0.92	-1
CO000066	1757	Q6VAF5.1	Tubulin beta-7 chain	Gossypium hirsutum	444	825	0	0.95	0.96	2
CO000067	807	YP_002870837.1	putative phage hypothetical protein	Pseudomonas fluorescens SBW25	190	150	1e-34	0.8	0.88	2
CO000068	973	ABV02033.1	glyceraldehyde 3-phosphate dehydrogenase	Nicotiana langsdorffii xNicotiana sanderae	340	530	e-148	0.88	0.93	1
CO000069	1018	EEF30797.1	40S ribosomal protein S5, putative	Ricinus communis	211	371	e-101	0.9	0.94	3
CO000070	1241	BAE48668.1	Alcohol acyl-transferase	Prunus mume	438	442	e-122	0.57	0.71	3
CO000071	614	EEF46849.1	steroid binding protein, putative	Ricinus communis	101	172	2e-41	0.78	0.92	3
CO000072	949	AAP80800.1	class VII chitinase precursor	Gossypium hirsutum	325	570	e-161	0.93	0.93	3
CO000073	860	AAD13216.1	latex-abundant protein	Hevea brasiliensis	417	417	e-115	0.73	0.81	2
CO000074	1274	XP_002317490.1	predicted protein	Populus trichocarpa	253	451	e-125	0.82	0.9	-2
CO000075	1819	ABO47736.1	alpha-tubulin	Gossypium hirsutum	450	839	0	0.95	0.96	2
CO000076	973	EEF34169.1	conserved hypothetical protein	Ricinus communis	271	344	7e-93	0.62	0.71	1
CO000077	682	XP_002264862.1	PREDICTED: hypothetical protein	Vitis vinifera	186	120	8e-26	0.49	0.61	2
CO000078	971	CAN72399.1	hypothetical protein	Vitis vinifera	315	317	9e-85	0.62	0.78	2
CO000079	985	XP_002318774.1	predicted protein	Populus trichocarpa	269	241	6e-62	0.48	0.65	2
CO000080	827	ACF06595.1	translationally controlled tumor protein	Elaeis guineensis	168	274	6e-72	0.79	0.83	1
CO000081	1641	AAL92026.1	tubulin beta-1	Gossypium hirsutum	445	855	0	0.96	0.96	1
CO000082	876	EEF29610.1	conserved hypothetical protein	Ricinus communis	356	373	e-101	0.86	0.95	3
CO000083	823	EEF35409.1	glycine-rich RNA-binding protein, putative	Ricinus communis	166	159	2e-37	0.88	0.97	2
CO000084	871	EEF39567.1	conserved hypothetical protein	Ricinus communis	523	331	5e-89	0.71	0.78	1
CO000085	887	XP_002307383.1	predicted protein	Populus trichocarpa	211	256	2e-66	0.65	0.71	1
CO000086	957	ABL86676.1	GLP2	Gossypium barbadense	205	357	1e-96	1	1	2
CO000087	840	AAB71227.1	Ca+2-binding EF hand protein	Glycine max	239	300	1e-79	0.6	0.75	3
CO000088	1171	ABU41233.1	xyloglucan endotransglycosylase	Gossypium hirsutum	289	575	e-162	0.94	0.94	3
CO000089	938	XP_002275765.1	PREDICTED: hypothetical protein	Vitis vinifera	193	318	5e-85	0.82	0.84	-2
CO000090	1001	ABY65004.1	14-3-3e protein	Gossypium hirsutum	262	477	e-133	1	1	2
CO000091	1275	XP_002285514.1	PREDICTED: hypothetical protein	Vitis vinifera	476	554	e-156	0.93	0.96	3
CO000092	1882	ABO47740.1	alpha-tubulin	Gossypium hirsutum	450	840	0	0.96	0.96	3
CO000093	1762	AAP73449.1	actin	Gossypium hirsutum	377	759	0	1	1	3
CO000094	826	ABK96322.1	unknown	Populus trichocarpa x Populus deltoides	239	312	2e-83	0.66	0.78	2
CO000095	1300	AAL67991.1	dehydration-induced protein RD22-like protein	Gossypium hirsutum	335	554	e-156	0.82	0.82	3
CO000096	857	XP_002271271.1	PREDICTED: hypothetical protein	Vitis vinifera	184	324	8e-87	0.86	0.89	2
CO000097	905	XP_002313006.1	predicted protein	Populus trichocarpa	207	223	2e-56	0.7	0.73	2
CO000098	891	XP_002267642.1	PREDICTED: hypothetical protein	Vitis vinifera	172	258	4e-67	0.74	0.9	1
CO000099	754	YP_026259.1	predicted regulator of arylsulfatase activity	Escherichia colistr. K-12 substr. MG1655	411	526	e-148	1	1	2
CO000100	1123	XP_002319744.1	predicted protein	Populus trichocarpa	489	350	2e-94	0.69	0.78	3
CO000101	722	EEF47031.1	conserved hypothetical protein	Ricinus communis	725	227	7e-58	0.92	0.95	1
CO000102	640	XP_002264142.1	PREDICTED: hypothetical protein	Vitis vinifera	145	165	3e-39	0.98	0.98	3
CO000103	1723	CAO68331.1	unnamed protein product	Vitis vinifera	433	622	e-176	0.71	0.82	1
CO000104	1616	CAB75356.1	AE9 stearoyl-ACP desaturase	Gossypium hirsutum	396	803	0	0.99	0.99	1
CO000105	1051	XP_002327437.1	predicted protein	Populus trichocarpa	266	243	2e-62	0.5	0.58	1
CO000106	198	YP_775881.1	magnesium-translocating P-type ATPase	Burkholderia ambifaria AMMD	926	69.7	9e-11	0.61	0.71	3
CO000107	775	XP_002282294.1	PREDICTED: hypothetical protein	Vitis vinifera	151	282	2e-74	0.97	0.98	2
CO000108	1578	ABA12222.1	translation elongation factor 1A-6	Gossypium hirsutum	447	881	0	1	1	2
CO000109	1574	AAY85180.1	pectate lyase	Gossypium hirsutum	411	763	0	0.89	0.89	3
CO000110	930	XP_002320694.1	predicted protein	Populus trichocarpa	255	323	1e-86	0.83	0.9	1
CO000111	1266	ACJ84304.1	unknown	Medicago truncatula	324	469	e-130	0.7	0.84	1
CO000112	984	XP_002279266.1	PREDICTED: hypothetical protein	Vitis vinifera	223	436	e-120	0.95	0.98	-1
CO000113	573	AAK60319.1	AT3g47831/T23J7	Arabidopsis thaliana	57	85.9	2e-15	0.72	0.83	1
CO000114	1318	XP_002281785.1	PREDICTED: hypothetical protein	Vitis vinifera	340	472	e-131	0.69	0.78	3
CO000115	1368	ABK94713.1	unknown	Populus trichocarpa	337	304	2e-80	0.55	0.63	1
CO000116	1161	XP_002272354.1	PREDICTED: hypothetical protein	Vitis vinifera	362	493	e-137	0.91	0.93	3
CO000117	770	CAC80550.1	cyclophilin	Ricinus communis	173	313	1e-83	0.87	0.9	3
CO000119	524	XP_002302417.1	predicted protein	Populus trichocarpa	78	127	6e-28	0.76	0.79	2
CO000120	863	EEF50599.1	conserved hypothetical protein	Ricinus communis	253	399	e-109	0.77	0.86	1
CO000121	1281	XP_002303634.1	predicted protein	Populus trichocarpa	462	496	e-138	0.73	0.81	1
CO000122	993	XP_002322794.1	predicted protein	Populus trichocarpa	209	284	9e-75	0.65	0.78	2
CO000123	1102	AAQ74889.1	Al-induced protein	Gossypium hirsutum	236	461	e-128	0.99	0.99	3
CO000124	831	NP_197478.1	TUA3; structural constituent of cytoskeleton	Arabidopsis thaliana	450	419	e-115	0.9	0.92	2
CO000125	1737	ABA12218.1	translation elongation factor 1A-2	Gossypium hirsutum	447	877	0	0.99	0.99	2
CO000126	1881	Q9SSV4.1	Inositol-3-phosphate synthase	Nicotiana paniculata	510	963	0	0.92	0.97	3
CO000127	1851	EEF52048.1	purine permease, putative	Ricinus communis	531	961	0	0.89	0.94	2
CO000128	643	AAQ84321.1	fiber protein Fb28	Gossypium barbadense	71	146	2e-33	1	1	2
CO000129	1247	ABK94105.1	unknown	Populus trichocarpa	499	493	e-137	0.64	0.77	2
CO000130	1199	ABR68797.1	arabinogalactan protein 2	Gossypium hirsutum	243	323	2e-86	0.74	0.74	3
CO000132	748	CAA89698.1	orf	Ricinus communis	142	234	8e-60	0.89	0.95	1
CO000133	1120	EEF41800.1	Repetitive proline-rich cell wall protein 2 precursor, putative	Ricinus communis	299	122	7e-26	0.69	0.73	3
CO000134	1505	EEF33829.1	conserved hypothetical protein	Ricinus communis	408	493	e-137	0.64	0.74	2
CO000135	776	AAZ20286.1	ubiquitin-conjugating enzyme 1	Arachis hypogaea	153	310	7e-83	1	1	2
CO000136	1515	AAL67994.1	acyltransferase-like protein	Gossypium hirsutum	434	797	0	0.92	0.92	1
CO000137	1186	NP_198897.1	cytochrome c1, putative	Arabidopsis thaliana	307	424	e-117	0.73	0.78	1
CO000138	829	ABY65003.1	14-3-3d protein	Gossypium hirsutum	261	474	e-132	0.93	0.98	3
CO000139	1620	XP_002320559.1	predicted protein	Populus trichocarpa	545	636	e-180	0.76	0.86	1
CO000140	980	XP_002308739.1	predicted protein	Populus trichocarpa	211	368	e-100	0.97	0.99	1
CO000141	962	XP_002278975.1	PREDICTED: hypothetical protein	Vitis vinifera	310	545	e-153	0.95	0.97	3
CO000142	993	XP_002285919.1	PREDICTED: hypothetical protein	Vitis vinifera	206	104	2e-20	0.38	0.46	3
CO000143	870	XP_002276462.1	PREDICTED: hypothetical protein	Vitis vinifera	418	306	2e-81	0.8	0.9	3
CO000144	1789	ABA54865.1	putative 3-deoxy-D-arabino-heptulosonate 7-phosphate synthase 3	Fagus sylvatica	539	911	0	0.84	0.89	1
CO000145	1937	ABL86680.1	EX3	Gossypium barbadense	258	471	e-130	0.9	0.9	3
CO000146	912	YP_262999.1	N-acetylglutamate synthase	Pseudomonas fluorescens Pf-5	432	166	4e-39	0.96	0.98	-3
CO000147	1158	XP_002265940.1	PREDICTED: hypothetical protein	Vitis vinifera	301	465	e-129	0.8	0.85	2
CO000149	1338	XP_002327494.1	predicted protein	Populus trichocarpa	703	629	e-178	0.83	0.85	2
CO000150	912	EEF46080.1	conserved hypothetical protein	Ricinus communis	495	288	7e-76	0.67	0.77	1
CO000151	1193	ACQ82802.1	vacuolar invertase	Gossypium hirsutum	645	685	0	0.98	0.99	2
CO000152	1655	BAA89049.1	sucrose synthase	Citrus unshiu	805	830	0	0.92	0.96	3
CO000154	1361	Q9AT55.1	S-adenosylmethionine synthetase 2	Elaeagnus umbellata	393	763	0	0.94	0.96	1
CO000155	411	ABK94181.1	unknown	Populus trichocarpa	67	68.2	3e-10	0.6	0.74	3
CO000156	1153	XP_002276692.1	PREDICTED: hypothetical protein	Vitis vinifera	223	254	2e-65	0.8	0.88	3
CO000157	878	EEF31571.1	6-phosphogluconate dehydrogenase, putative	Ricinus communis	488	551	e-155	0.92	0.98	1
CO000158	1058	CAO44184.1	unnamed protein product	Vitis vinifera	241	435	e-120	0.9	0.92	1
CO000159	1391	ABL86678.1	EX1	Gossypium barbadense	188	368	e-99	0.92	0.92	1
CO000160	270	YP_002870532.1	putative hydrolase	Pseudomonas fluorescens SBW25	282	170	5e-41	0.96	0.96	3
CO000161	805	XP_002267566.1	PREDICTED: hypothetical protein	Vitis vinifera	596	168	5e-40	0.6	0.71	1
CO000163	1201	XP_002310366.1	methylenetetrahydrofolate reductase	Populus trichocarpa	608	703	0	0.84	0.93	2
CO000164	1443	ABG26370.1	DELLA protein GAI	Gossypium barbadense	616	801	0	0.86	0.87	2
CO000165	1089	XP_002307854.1	predicted protein	Populus trichocarpa	201	191	1e-46	0.5	0.66	3
CO000166	576	ACJ84132.1	unknown	Medicago truncatula	86	159	1e-37	0.88	0.88	3
CO000167	864	XP_002309260.1	predicted protein	Populus trichocarpa	246	343	2e-92	0.71	0.78	1
CO000168	716	EEF27913.1	transcription initiation factor iib, putative	Ricinus communis	312	360	7e-98	0.98	0.99	1
CO000169	1190	ABK95689.1	unknown	Populus trichocarpa	372	287	2e-75	0.48	0.56	2
CO000170	936	EEF45268.1	lipid binding protein, putative	Ricinus communis	206	229	4e-58	0.56	0.66	2
CO000171	1103	XP_002313187.1	nucleobase ascorbate transporter	Populus trichocarpa	533	491	e-137	0.66	0.77	3
CO000172	1704	XP_002273358.1	PREDICTED: hypothetical protein	Vitis vinifera	485	554	e-156	0.72	0.86	3
CO000173	878	NP_001147027.1	polyubiquitin containing 7 ubiquitin monomers	Zea mays	311	429	e-118	1	1	2
CO000174	1379	EEF41044.1	dead box ATP-dependent RNA helicase, putative	Ricinus communis	413	763	0	0.96	0.98	2
CO000175	788	XP_002326765.1	predicted protein	Populus trichocarpa	127	99.4	3e-19	0.54	0.74	2
CO000176	1509	CAE54308.1	cytochrome P450-like protein	Gossypium hirsutum	511	754	0	0.98	0.99	1
CO000177	872	XP_002284989.1	PREDICTED: hypothetical protein isoform 1	Vitis vinifera	245	311	e-109	0.94	0.98	2
CO000178	1601	EEC71666.1	hypothetical protein OsI_04129	Oryza sativa Indica Group	496	840	0	0.95	0.96	1
CO000179	771	XP_002284543.1	PREDICTED: hypothetical protein	Vitis vinifera	862	256	2e-66	0.53	0.63	1
CO000180	510	XP_002325421.1	predicted protein	Populus trichocarpa	59	63.9	6e-09	0.61	0.69	1
CO000181	802	AAQ08018.1	endo-1,4-beta-glucanase	Gossypium hirsutum	619	488	e-136	0.85	0.88	2
CO000182	1102	EEF51802.1	elongation factor 1-beta, putative	Ricinus communis	232	280	2e-73	0.65	0.69	1
CO000183	691	EEF42345.1	NADH-ubiquinone oxidoreductase subunit B17.2, putative	Ricinuscommunis	159	290	6e-77	0.82	0.91	1
CO000184	914	BAF46352.1	alpha chain of nascent polypeptide associated complex	Nicotiana benthamiana	201	246	2e-63	0.7	0.75	3
CO000185	1126	XP_002282119.1	PREDICTED: similar to polyubiquitin	Vitis vinifera	761	590	e-167	1	1	2
CO000186	1561	AAY23354.1	3-ketoacyl-CoA reductase 1	Gossypium hirsutum	320	610	e-172	0.94	0.94	2
CO000187	889	ABV60087.1	beta-ketoacyl-CoA synthase	Gossypium hirsutum	529	431	e-119	0.87	0.93	1
CO000188	617	EEF31021.1	conserved hypothetical protein	Ricinus communis	57	117	9e-25	0.91	0.94	1
CO000189	921	XP_002272642.1	PREDICTED: hypothetical protein	Vitis vinifera	213	107	2e-21	0.41	0.57	1
CO000190	896	AAR07596.1	fiber protein Fb34	Gossypium barbadense	185	367	e-100	0.98	0.98	2
CO000191	895	ABO31374.1	unknown	Gossypium hirsutum	254	369	e-100	0.82	0.82	2
CO000192	875	ACS83603.1	ATP synthase delta subunit 2	Gossypium hirsutum	201	380	e-104	0.96	0.98	2
CO000193	2009	AAF91226.1	protein kinase	Gossypium hirsutum	241	434	e-119	0.92	0.92	2
CO000194	1181	ABL86674.1	PDF	Gossypium barbadense	294	199	4e-49	0.86	0.86	2
CO000195	1327	P46259.1	Tubulin alpha-1 chain	Pisum sativum	452	322	e-172	0.82	0.83	1
CO000196	607	XP_002282071.1	PREDICTED: similar to ubiquitin fusion protein	Vitis vinifera	128	259	1e-67	1	1	3
CO000197	854	XP_002273286.1	PREDICTED: hypothetical protein	Vitis vinifera	196	197	8e-49	0.96	0.96	3
CO000198	1274	XP_002315231.1	predicted protein	Populus trichocarpa	346	620	e-176	0.89	0.92	3
CO000199	1052	XP_002310303.1	predicted protein	Populus trichocarpa	260	504	e-141	0.95	0.98	2
CO000200	844	ACS83601.1	ATP synthase delta subunit 1	Gossypium hirsutum	200	264	9e-69	0.88	0.88	3
CO000201	806	NP_194573.1	DNA-binding protein-related	Arabidopsis thaliana	153	184	8e-45	0.67	0.74	3
CO000202	849	YP_002874249.1	putative flagellar hook protein	Pseudomonas fluorescens SBW25	434	285	4e-75	0.97	0.97	3
CO000203	943	EEF38511.1	zinc finger protein, putative	Ricinus communis	172	189	4e-46	0.55	0.61	3
CO000204	1549	XP_002276890.1	PREDICTED: hypothetical protein isoform 2	Vitis vinifera	1042	773	0	0.84	0.87	3
CO000205	942	XP_002276048.1	PREDICTED: hypothetical protein	Vitis vinifera	485	304	e-111	0.88	0.94	2
CO000206	673	AAD47346.1	ribosomal protein S26	Pisum sativum	130	167	7e-40	0.71	0.73	3
CO000207	1405	EEF31020.1	dtdp-glucose 4-6-dehydratase, putative	Ricinus communis	346	627	e-177	0.89	0.92	1
CO000208	924	CAC86003.1	aspartic proteinase	Theobroma cacao	514	395	e-108	0.84	0.95	1
CO000209	231	YP_002870721.1	GTP-binding protein	Pseudomonas fluorescens SBW25	302	130	4e-29	0.97	0.97	-3
CO000211	969	ABW89462.1	glutamine synthetase	Gossypium hirsutum	356	598	e-169	0.93	0.93	3
CO000212	650	AAT39969.1	60S ribosomal protein L34, putative	Solanum demissum	120	190	8e-47	0.96	0.98	1
CO000213	1075	EEF39935.1	ribonuclease t2, putative	Ricinus communis	226	347	2e-93	0.68	0.8	3
CO000214	1398	ABK96406.1	unknown	Populus trichocarpa x Populus deltoides	358	625	e-177	0.9	0.93	1
CO000215	837	XP_002284068.1	PREDICTED: hypothetical protein isoform 2	Vitis vinifera	157	320	1e-85	0.96	0.99	2
CO000216	314	YP_002872324.1	putative ATP-binding component of ABC transporter protein	Pseudomonas fluorescens SBW25	371	196	5e-49	0.98	1	2
CO000217	933	EEF30505.1	glutathione-s-transferase theta, gst, putative	Ricinus communis	213	315	5e-84	0.7	0.8	2
CO000218	923	AAA84881.1	FbLate-2 gene product	Gossypium barbadense	333	58.2	1e-06	1	1	1
CO000220	1355	XP_002283057.1	PREDICTED: hypothetical protein isoform 3	Vitis vinifera	172	275	8e-72	0.73	0.84	3
CO000221	736	XP_002282139.1	PREDICTED: hypothetical protein	Vitis vinifera	438	236	1e-60	0.92	0.97	2
CO000222	560	CAO66154.1	unnamed protein product	Vitis vinifera	105	141	3e-32	0.75	0.85	3
CO000223	1763	ABK94105.1	unknown	Populus trichocarpa	499	351	e-173	0.6	0.72	3
CO000224	1513	XP_002311447.1	lysine/histidine transporter	Populus trichocarpa	435	728	0	0.79	0.85	1
CO000225	1449	XP_002300143.1	mitochondrial phosphate carrier protein	Populus trichocarpa	366	501	e-140	0.82	0.85	1
CO000226	1206	EEF48284.1	aldehyde dehydrogenase, putative	Ricinus communis	501	617	e-175	0.74	0.85	2
CO000227	915	XP_002283057.1	PREDICTED: hypothetical protein isoform 3	Vitis vinifera	172	262	4e-68	0.72	0.77	2
CO000228	1062	AAR07601.1	fiber quinone-oxidoreductase	Gossypium barbadense	322	430	e-118	0.79	0.82	2
CO000229	676	ZP_04585887.1	DNA-directed RNA polymerase subunit beta'	Pseudomonas syringae pv.oryzae str. 1_6	1399	411	e-113	0.94	0.94	-1
CO000230	1332	CAC12826.1	malate dehydrogenase	Nicotiana tabacum	332	602	e-170	0.9	0.93	1
CO000232	645	EEF32263.1	conserved hypothetical protein	Ricinus communis	81	148	4e-34	0.85	0.92	3
CO000233	983	ABA00455.1	MnSOD	Gossypium hirsutum	231	427	e-118	0.89	0.93	3
CO000234	532	EEF49643.1	protein phsophatase-2a, putative	Ricinus communis	303	115	2e-24	0.98	1	3
CO000235	638	XP_002280639.1	PREDICTED: hypothetical protein	Vitis vinifera	109	192	3e-47	0.84	0.91	1
CO000236	906	EEF45822.1	3'-5' exonuclease, putative	Ricinus communis	342	449	e-124	0.8	0.9	3
CO000237	1272	CAQ58628.1	Putative 2-3 biphosphoglycerate independant phosphoglycerate mutase	Vitis vinifera	559	680	0	0.88	0.92	1
CO000238	1583	AAB03081.1	E6-2 protein kinase	Gossypium hirsutum	246	423	e-116	0.88	0.88	1
CO000239	583	XP_002283422.1	PREDICTED: hypothetical protein	Vitis vinifera	107	134	6e-30	0.89	0.97	1
CO000240	790	EEF35409.1	glycine-rich RNA-binding protein, putative	Ricinus communis	166	161	7e-38	0.88	0.96	2
CO000241	1244	AAQ56599.1	chitinase-like protein	Gossypium hirsutum	316	679	0	0.99	0.99	1
CO000242	502	ZP_02360817.1	twin-arginine translocation pathway signal sequence domain protein	Burkholderia oklahomensis EO147	301	215	1e-54	0.63	0.72	-3
CO000243	522	XP_002330494.1	nucleosome/chromatin assembly factor group	Populus trichocarpa	467	76.6	9e-13	0.77	0.84	1
CO000244	463	YP_350159.1	chemotaxis sensory transducer, Cache sensor	Pseudomonasfluorescens Pf0-1	629	218	2e-55	0.74	0.79	2
CO000245	610	ABS72187.1	acidic ribosomal protein P3	Corchorus olitorius	119	89.7	2e-16	0.45	0.49	2
CO000246	896	ABK96664.1	unknown	Populus trichocarpa x Populus deltoides	189	230	2e-58	0.62	0.73	2
CO000247	506	XP_002327192.1	predicted protein	Populus trichocarpa	88	136	7e-31	0.82	0.92	1
CO000248	913	ABK93941.1	unknown	Populus trichocarpa	180	197	9e-49	0.97	1	2
CO000249	1244	ABM64802.1	anthocyanidin reductase	Gossypium hirsutum	336	638	0	0.98	0.99	1
CO000250	1134	XP_002302480.1	predicted protein	Populus trichocarpa	199	345	4e-93	0.87	0.93	2
CO000251	896	EEF31218.1	conserved hypothetical protein	Ricinus communis	158	223	3e-56	0.71	0.77	2
CO000252	962	EEF48896.1	40S ribosomal protein S2, putative	Ricinus communis	270	420	e-116	0.95	0.97	-2
CO000253	1296	XP_002272389.1	PREDICTED: hypothetical protein	Vitis vinifera	509	244	2e-62	0.41	0.48	2
CO000254	972	ACP28878.1	tonoplast intrinsic protein	Gossypium hirsutum	251	434	e-120	0.87	0.9	1
CO000255	832	EEF50677.1	conserved hypothetical protein	Ricinus communis	256	379	e-103	0.81	0.88	3
CO000256	990	EEF51268.1	conserved hypothetical protein	Ricinus communis	260	311	6e-83	0.65	0.71	3
CO000258	459	YP_002873987.1	flagellar L-ring protein	Pseudomonas fluorescens SBW25	231	290	2e-77	0.96	0.97	-3
CO000261	1338	ABZ01816.1	cinnamyl alcohol dehydrogenase	Gossypium hirsutum	359	618	e-175	0.88	0.88	3
CO000262	1765	XP_002274863.1	PREDICTED: hypothetical protein	Vitis vinifera	535	875	0	0.81	0.91	3
CO000263	535	XP_002310323.1	predicted protein	Populus trichocarpa	101	150	4e-35	0.69	0.8	2
CO000264	1259	EEF52142.1	calmodulin binding protein, putative	Ricinus communis	590	223	3e-56	0.5	0.62	1
CO000265	872	EEF43333.1	conserved hypothetical protein	Ricinus communis	281	424	e-117	0.79	0.88	2
CO000266	933	XP_002263156.1	PREDICTED: hypothetical protein	Vitis vinifera	416	457	e-127	0.73	0.77	2
CO000267	1090	XP_002318327.1	predicted protein	Populus trichocarpa	501	438	e-121	0.72	0.85	1
CO000268	721	XP_002327030.1	predicted protein	Populus trichocarpa	192	148	4e-34	0.68	0.81	2
CO000269	266	ACN58739.1	dlycerophosphoryl diester phosphodiesterase	uncultured bacteriumBLR1	870	122	9e-27	0.76	0.85	2
CO000270	1408	ABA12220.1	translation elongation factor 1A-4	Gossypium hirsutum	447	731	0	0.96	0.97	2
CO000271	1194	AAG10197.1	cinnamate-4-hydroxylase	Gossypium arboreum	505	595	e-168	0.89	0.91	1
CO000272	609	EEF31513.1	lipid binding protein, putative	Ricinus communis	145	150	1e-34	0.61	0.76	1
CO000273	887	YP_237064.1	PAS	Pseudomonas syringae pv. syringae B728a	796	446	e-123	0.74	0.84	-2
CO000274	1049	ABN12322.1	phenylcoumaran benzylic ether reductase-like protein	Gossypium hirsutum	308	603	e-171	0.98	0.99	3
CO000275	908	CAO15922.1	unnamed protein product	Vitis vinifera	377	327	1e-87	0.79	0.86	2
CO000276	839	YP_002085158.1	hypothetical protein PACG_05330	Pseudomonas aeruginosa C3719	309	271	7e-71	0.8	0.89	2
CO000277	822	XP_002303380.1	predicted protein	Populus trichocarpa	247	108	5e-22	0.75	0.88	-1
CO000278	731	ABW74471.1	auxin-repressed protein	Paeonia suffruticosa	126	143	2e-32	0.57	0.64	1
CO000279	1340	XP_002278444.1	PREDICTED: hypothetical protein	Vitis vinifera	383	698	0	0.88	0.94	3
CO000280	1333	EEF28267.1	protein farnesyltransferase alpha subunit, putative	Ricinuscommunis	333	482	e-134	0.67	0.79	3
CO000281	1120	CAO39742.1	unnamed protein product	Vitis vinifera	435	208	e-118	0.71	0.89	2
CO000282	962	EEF50873.1	NADH-ubiquinone oxidoreductase 1, chain, putative	Ricinuscommunis	222	379	e-103	0.83	0.88	1
CO000283	1182	ABK81651.1	glutathione S-transferase	Vitis vinifera	214	307	2e-81	0.71	0.8	3
CO000284	583	XP_002278997.1	PREDICTED: hypothetical protein	Vitis vinifera	1081	263	7e-69	0.9	0.9	1
CO000285	737	EEF45248.1	40S ribosomal protein S3a, putative	Ricinus communis	260	325	3e-87	0.91	0.96	3
CO000286	924	EEF37134.1	conserved hypothetical protein	Ricinus communis	247	365	3e-99	0.69	0.79	1
CO000287	360	ACE06982.1	obtusifoliol-14alpha-demethylase	Gossypium hirsutum	486	103	6e-21	0.8	0.8	3
CO000288	1037	BAA21110.1	endo-1,3-beta-glucanase	Gossypium hirsutum	266	457	e-127	0.97	0.98	2
CO000289	608	ABS72192.1	mitochondrial NADH-ubiquinone oxidoreductase	Corchorus olitorius	103	196	9e-49	0.9	0.94	1
CO000290	1800	ACJ11250.1	S-adenosyl-L-homocystein hydrolase	Gossypium hirsutum	485	950	0	0.96	0.97	3
CO000291	900	YP_002875593.1	hypothetical protein PFLU6111	Pseudomonas fluorescens SBW25	1934	540	e-152	0.95	0.98	-3
CO000292	816	AAT64010.1	putative GTP-binding protein	Gossypium hirsutum	218	414	e-114	0.96	0.98	2
CO000293	664	O22644.1	60S ribosomal protein L23A	Fritillaria agrestis	154	183	1e-44	0.79	0.83	3
CO000294	899	YP_002873088.1	putative 3-ketoacyl-CoA thiolase	Pseudomonas fluorescens SBW25	432	544	e-153	0.93	0.95	-2
CO000295	1082	Q01197.1	Protein E6	Gossypium hirsutum	238	238	6e-61	0.5	0.57	-2
CO000296	992	EEF37007.1	nucleoredoxin, putative	Ricinus communis	575	386	e-105	0.67	0.78	2
CO000297	892	ABY86661.1	beta-tubulin 15	Gossypium hirsutum	445	534	e-150	0.94	0.94	3
CO000298	1873	CAN70790.1	hypothetical protein	Vitis vinifera	126	146	7e-33	0.92	0.92	2
CO000299	888	XP_002283405.1	PREDICTED: hypothetical protein	Vitis vinifera	697	270	1e-70	0.57	0.65	1
CO000300	796	EEF47481.1	protein with unknown function	Ricinus communis	1086	294	6e-78	0.83	0.86	1
CO000301	819	CAC86004.1	aspartic proteinase	Theobroma cacao	514	370	e-101	0.86	0.94	2
CO000302	942	A2IBF8.1	Chalcone--flavonone isomerase	Gossypium hirsutum	227	442	e-122	0.98	0.99	1
CO000303	1066	EEF51410.1	steroid binding protein, putative	Ricinus communis	242	306	3e-81	0.75	0.79	1
CO000304	1219	ABO47737.1	alpha-tubulin	Gossypium hirsutum	451	743	0	0.95	0.95	2
CO000305	888	XP_002323253.1	predicted protein	Populus trichocarpa	349	290	1e-76	0.62	0.74	2
CO000306	855	XP_002284698.1	PREDICTED: hypothetical protein	Vitis vinifera	326	261	8e-68	0.51	0.63	3
CO000307	769	YP_002871420.1	phosphorous compounds metabolism-related protein	Pseudomonas fluorescens SBW25	280	241	4e-62	0.96	0.97	-2
CO000308	447	XP_002466535.1	hypothetical protein SORBIDRAFT_01g009570	Sorghum bicolor	452	76.6	7e-13	1	1	1
CO000309	1233	ACM78591.1	granule-bound starch synthase	Nelumbo nucifera	615	504	e-141	0.79	0.89	2
CO000310	889	YP_002874845.1	putative cytochrome oxidase subunit I	Pseudomonas fluorescensSBW25	479	232	4e-59	0.78	0.8	-3
CO000311	804	EEF29614.1	GMP synthase, putative	Ricinus communis	243	308	4e-82	0.66	0.77	2
CO000312	1004	XP_001676261.1	Hypothetical protein CBG17156	Caenorhabditis briggsae AF16	376	63.2	4e-08	0.25	0.45	3
CO000313	1294	ACJ38665.1	cellulose synthase	Betula luminifera	1041	663	0	0.84	0.88	2
CO000314	832	CAO61841.1	unnamed protein product	Vitis vinifera	142	221	5e-56	0.98	0.99	1
CO000315	1123	ABL86687.1	TLP1	Gossypium barbadense	244	509	e-142	0.97	0.97	1
CO000316	1200	EEF40118.1	preprotein translocase secy subunit, putative	Ricinus communis	476	665	0	0.98	0.99	2
CO000317	1698	BAA89049.1	sucrose synthase	Citrus unshiu	805	884	0	0.85	0.92	2
CO000318	869	CAC86003.1	aspartic proteinase	Theobroma cacao	514	405	e-111	0.84	0.91	1
CO000319	1315	XP_002304855.1	predicted protein	Populus trichocarpa	299	552	e-155	0.9	0.95	2
CO000321	789	ABK94515.1	unknown	Populus trichocarpa	236	259	2e-67	0.62	0.71	3
CO000322	848	XP_002281940.1	PREDICTED: hypothetical protein	Vitis vinifera	320	270	1e-70	0.62	0.77	1
CO000323	736	ABF93903.1	60S ribosomal protein L21, putative, expressed	Oryza sativa(japonica cultivar-group)	164	327	9e-88	0.93	0.98	2
CO000325	1061	NP_181474.2	esterase/lipase/thioesterase family protein	Arabidopsis thaliana	317	473	e-131	0.7	0.84	1
CO000326	1158	XP_002270031.1	PREDICTED: hypothetical protein	Vitis vinifera	333	221	3e-59	0.47	0.54	2
CO000327	697	XP_002274381.1	PREDICTED: hypothetical protein	Vitis vinifera	150	237	8e-61	0.87	0.89	2
CO000328	210	NP_745418.1	phenylacetate-CoA oxygenase, PaaJ subunit	Pseudomonas putidaKT2440	177	125	1e-27	0.85	0.94	3
CO000329	1324	CAE54306.1	putative papain-like cysteine proteinase	Gossypium hirsutum	373	654	0	0.83	0.89	2
CO000330	1159	ACJ85516.1	unknown	Medicago truncatula	267	422	e-116	0.79	0.85	2
CO000331	1459	ABW21688.1	enolase	Gossypium hirsutum	445	820	0	0.99	0.99	2
CO000332	808	XP_002329018.1	predicted protein	Populus trichocarpa	591	478	e-133	0.81	0.94	1
CO000333	1497	ACQ91203.1	calreticulin	Carica papaya	422	650	0	0.86	0.91	2
CO000334	887	YP_002873374.1	NADH dehydrogenase I chain C/D	Pseudomonas fluorescens SBW25	594	598	e-169	0.98	0.98	3
CO000335	1474	AAL67992.1	putative serine carboxypeptidase precursor	Gossypium hirsutum	507	952	0	0.96	0.96	3
CO000336	659	XP_002285101.1	PREDICTED: hypothetical protein	Vitis vinifera	144	280	1e-73	0.97	0.99	2
CO000337	944	EEF41749.1	selenium-binding protein, putative	Ricinus communis	475	593	e-167	0.85	0.94	3
CO000338	896	XP_002309175.1	predicted protein	Populus trichocarpa	477	421	e-116	0.79	0.86	1
CO000339	360	YP_002873843.1	L-lactate dehydrogenase	Pseudomonas fluorescens SBW25	385	235	1e-60	0.9	0.95	2
CO000340	762	ABK54296.1	glycine-rich protein	Gossypium hirsutum	105	65.9	4e-09	1	1	3
CO000341	782	ABK96305.1	unknown	Populus trichocarpa x Populus deltoides	221	380	e-104	0.87	0.95	3
CO000343	424	AAC78469.1	manganese superoxide dismutase	Gossypium hirsutum	198	189	8e-47	1	1	3
CO000344	1066	XP_002272348.1	PREDICTED: hypothetical protein	Vitis vinifera	394	449	e-124	0.69	0.77	2
CO000345	1854	ABA01490.1	3-ketoacyl-CoA synthase	Gossypium hirsutum	492	984	0	0.98	0.98	1
CO000346	1391	XP_002452705.1	hypothetical protein SORBIDRAFT_04g031060	Sorghum bicolor	459	714	0	0.99	1	1
CO000347	1532	EEF49271.1	Membrane protein PB1A10.07c, putative	Ricinus communis	413	636	e-180	0.78	0.83	1
CO000348	1013	XP_002270699.1	PREDICTED: hypothetical protein	Vitis vinifera	200	340	1e-91	0.87	0.88	1
CO000349	1105	XP_002319717.1	histone ubiquitination proteins group	Populus trichocarpa	152	320	2e-85	1	1	2
CO000350	560	YP_173374.1	hypothetical protein NitaMp027	Nicotiana tabacum	138	153	9e-36	0.96	0.97	-2
CO000351	212	YP_003001409.1	hypothetical protein B21_03675	Escherichia coli BL21	251	137	3e-31	1	1	-2
CO000352	887	YP_002976460.1	NAD(P)H dehydrogenase (quinone)	Rhizobium leguminosarum bv.trifolii WSM1325	206	169	4e-40	0.48	0.59	1
CO000353	1066	EEF43248.1	Stem-specific protein TSJT1, putative	Ricinus communis	255	406	e-111	0.76	0.87	3
CO000354	960	XP_002298022.1	predicted protein	Populus trichocarpa	226	301	8e-80	0.68	0.78	3
CO000355	504	CAC39481.2	metallothionein-like protein	Quercus suber	77	78.2	3e-13	0.66	0.69	1
CO000356	1447	XP_001072332.1	PREDICTED: hypothetical protein	Rattus norvegicus	479	97.4	3e-18	0.26	0.43	2
CO000357	1470	XP_002263826.1	PREDICTED: hypothetical protein	Vitis vinifera	426	841	0	0.97	0.98	2
CO000358	1102	EEF49705.1	cysteine synthase, putative	Ricinus communis	325	535	e-150	0.86	0.89	1
CO000359	760	Q43019.1	Non-specific lipid-transfer protein 3	Prunus dulcis	123	150	1e-34	0.55	0.74	2
CO000361	943	EEF29030.1	Late embryogenesis abundant protein Lea14-A, putative	Ricinuscommunis	313	456	e-126	0.81	0.88	1
CO000362	1209	AAC33305.1	fiber annexin	Gossypium hirsutum	316	602	e-170	0.96	0.96	1
CO000363	862	XP_002273550.1	PREDICTED: hypothetical protein	Vitis vinifera	324	317	9e-85	0.63	0.73	1
CO000364	1257	AAA84881.1	FbLate-2 gene product	Gossypium barbadense	333	175	8e-42	0.44	0.49	2
CO000366	852	XP_002264609.1	PREDICTED: hypothetical protein	Vitis vinifera	220	433	e-119	0.94	0.97	1
CO000367	1018	XP_002307823.1	predicted protein	Populus trichocarpa	617	504	e-141	0.86	0.9	1
CO000368	983	XP_002271991.1	PREDICTED: hypothetical protein	Vitis vinifera	887	346	2e-93	0.71	0.81	2
CO000369	887	XP_002283209.1	PREDICTED: hypothetical protein	Vitis vinifera	216	363	2e-98	0.79	0.88	3
CO000370	615	XP_002311105.1	predicted protein	Populus trichocarpa	422	221	5e-56	0.83	0.89	1
CO000371	722	XP_002284455.1	PREDICTED: hypothetical protein	Vitis vinifera	146	218	3e-55	0.76	0.8	1
CO000372	762	XP_002270550.1	PREDICTED: hypothetical protein	Vitis vinifera	594	202	3e-50	0.71	0.81	1
CO000373	1290	XP_002284346.1	PREDICTED: hypothetical protein	Vitis vinifera	480	689	0	0.91	0.96	3
CO000374	1254	NP_196821.1	SAG29 (SENESCENCE-ASSOCIATED PROTEIN 29)	Arabidopsis thaliana	292	369	e-100	0.66	0.81	2
CO000375	835	XP_002312899.1	predicted protein	Populus trichocarpa	477	307	9e-82	0.74	0.84	2
CO000376	590	EEF47055.1	60S acidic ribosomal protein P1, putative	Ricinus communis	113	105	2e-21	0.51	0.56	2
CO000377	806	XP_002271669.1	PREDICTED: hypothetical protein	Vitis vinifera	171	147	9e-34	0.51	0.59	3
CO000378	1064	XP_002270455.1	PREDICTED: hypothetical protein	Vitis vinifera	380	690	0	0.94	0.98	2
CO000379	945	ACJ85464.1	unknown	Medicago truncatula	181	363	1e-98	0.99	1	3
CO000380	972	AAA91811.1	alcohol dehydrogenase 2a	Gossypium hirsutum	379	494	e-138	0.94	0.94	3
CO000381	619	EEF45530.1	RALFL33, putative	Ricinus communis	117	135	3e-30	0.72	0.82	2
CO000382	533	CAO48221.1	unnamed protein product	Vitis vinifera	160	83.2	1e-14	0.45	0.6	1
CO000383	2533	XP_002318860.1	predicted protein	Populus trichocarpa	778	1250	0	0.78	0.85	1
CO000384	733	XP_002314513.1	predicted protein	Populus trichocarpa	150	181	5e-44	0.64	0.75	2
CO000385	757	AAY43794.1	E6-like	Gossypium hirsutum	221	271	4e-71	0.86	0.86	-3
CO000386	1507	XP_002283063.1	PREDICTED: hypothetical protein	Vitis vinifera	478	624	e-176	0.8	0.91	1
CO000387	878	XP_002311564.1	predicted protein	Populus trichocarpa	309	430	e-118	0.8	0.88	2
CO000388	828	ABN50365.2	ethylene responsive element binding protein 1	Gossypium barbadense	255	371	e-101	0.85	0.85	3
CO000389	1192	XP_002277320.1	PREDICTED: hypothetical protein	Vitis vinifera	1084	243	4e-62	0.46	0.6	2
CO000390	866	XP_002324298.1	predicted protein	Populus trichocarpa	459	429	e-118	0.77	0.86	3
CO000391	560	XP_002268801.1	PREDICTED: hypothetical protein isoform 2	Vitis vinifera	110	184	4e-45	0.92	0.96	1
CO000392	688	EEF42352.1	AMP dependent CoA ligase, putative	Ricinus communis	573	265	4e-69	0.68	0.76	1
CO000393	952	EEF48599.1	14-3-3 protein, putative	Ricinus communis	254	464	e-129	0.94	0.97	2
CO000394	846	XP_002264628.1	PREDICTED: hypothetical protein	Vitis vinifera	300	324	7e-87	0.68	0.78	2
CO000396	670	XP_002327192.1	predicted protein	Populus trichocarpa	88	110	8e-23	0.74	0.82	1
CO000397	745	EEF38080.1	40S ribosomal protein S18, putative	Ricinus communis	152	273	9e-72	0.9	0.9	3
CO000398	689	AAM75351.1	extensin-like protein	Glycine max	179	63.2	2e-08	0.44	0.64	1
CO000399	523	YP_361589.1	putative secreted protein	Xanthomonas campestris pv. vesicatoriastr. 85-10	378	226	9e-58	0.64	0.81	1
CO000400	887	YP_002873479.1	DNA-binding ATP-dependent protease La; heat shock K-protein	Pseudomonas fluorescens SBW25	798	225	5e-57	0.97	1	-2
CO000401	889	ABY65003.1	14-3-3d protein	Gossypium hirsutum	261	505	e-141	0.98	0.98	2
CO000402	1375	ABK92591.1	unknown	Populus trichocarpa	342	569	e-160	0.79	0.88	3
CO000403	1763	ABY86655.1	beta-tubulin 4	Gossypium hirsutum	448	851	0	0.96	0.96	3
CO000404	1075	CAO48730.1	unnamed protein product	Vitis vinifera	415	421	e-131	0.9	0.97	3
CO000405	925	XP_002330403.1	predicted protein	Populus trichocarpa	95	100	2e-22	0.67	0.72	2
CO000406	662	XP_002264348.1	PREDICTED: hypothetical protein	Vitis vinifera	165	114	5e-24	0.51	0.55	2
CO000407	853	AAR07596.1	fiber protein Fb34	Gossypium barbadense	185	320	1e-85	0.9	0.95	1
CO000408	1008	EEF40924.1	Vacuolar protein sorting-associated protein VPS28, putative	Ricinus communis	209	368	e-100	0.88	0.92	1
CO000409	1330	EEF44275.1	potassium channel beta, putative	Ricinus communis	328	635	e-180	0.93	0.98	2
CO000410	704	XP_002269798.1	PREDICTED: hypothetical protein	Vitis vinifera	447	233	1e-59	0.8	0.88	3
CO000411	815	XP_002324195.1	predicted protein	Populus trichocarpa	234	355	4e-96	0.9	0.91	3
CO000412	544	XP_002299972.1	predicted protein	Populus trichocarpa	97	171	3e-41	0.87	0.92	1
CO000413	480	YP_002873038.1	hypothetical protein PFLU3474	Pseudomonas fluorescens SBW25	449	274	2e-72	0.87	0.93	-2
CO000414	538	CAO46924.1	unnamed protein product	Vitis vinifera	299	164	4e-39	0.76	0.86	1
CO000415	1153	XP_002319122.1	predicted protein	Populus trichocarpa	546	350	2e-94	0.63	0.67	1
CO000416	1260	EEF38101.1	malate dehydrogenase, putative	Ricinus communis	345	548	e-154	0.83	0.88	2
CO000418	579	EEF43612.1	d-3-phosphoglycerate dehydrogenase, putative	Ricinus communis	596	216	1e-54	0.91	0.98	3
CO000419	1105	ABK96194.1	unknown	Populus trichocarpa	329	437	e-124	0.78	0.89	2
CO000420	745	ABA81878.1	rieske iron-sulfur protein-like	Solanum tuberosum	265	335	2e-90	0.91	0.98	2
CO000421	1001	XP_002273246.1	PREDICTED: hypothetical protein	Vitis vinifera	642	436	e-120	0.76	0.86	1
CO000422	609	EEF35549.1	peptidase, putative	Ricinus communis	129	153	1e-35	0.88	0.97	1
CO000423	741	CAO68287.1	unnamed protein product	Vitis vinifera	216	332	2e-89	0.9	0.95	1
CO000424	778	XP_002306948.1	predicted protein	Populus trichocarpa	365	308	4e-82	0.68	0.8	2
CO000425	1439	BAA76883.1	DnaJ homolog protein	Salix gilgiana	423	584	e-165	0.71	0.82	2
CO000426	882	O22342.1	ADP,ATP carrier protein 1, mitochondrial	Gossypium hirsutum	386	491	e-137	0.93	0.93	3
CO000427	683	Q9AT56.1	S-adenosylmethionine synthetase 1	Elaeagnus umbellata	393	253	1e-65	0.95	0.98	3
CO000428	421	XP_002298768.1	predicted protein	Populus trichocarpa	56	124	2e-27	0.94	0.94	1
CO000430	989	XP_002264609.1	PREDICTED: hypothetical protein	Vitis vinifera	220	441	e-122	0.94	0.98	3
CO000431	2204	ACS83602.1	ATP synthase beta subunit 1	Gossypium hirsutum	557	947	0	0.94	0.94	1
CO000432	956	YP_002870468.1	putative multiphosphoryl transfer protein, PTS system	Pseudomonas fluorescens SBW25	952	543	e-152	0.88	0.89	2
CO000433	978	EEF38101.1	malate dehydrogenase, putative	Ricinus communis	345	479	e-133	0.83	0.88	3
CO000434	1325	CAN81808.1	hypothetical protein	Vitis vinifera	460	476	e-132	0.61	0.71	1
CO000435	1298	ABO61378.1	mitochondrial serine hydroxymethyltransferase	Populus tremuloides	516	675	0	0.89	0.92	1
CO000436	1160	ABR68797.1	arabinogalactan protein 2	Gossypium hirsutum	243	323	2e-86	0.74	0.74	3
CO000437	536	EEF41170.1	conserved hypothetical protein	Ricinus communis	66	62.4	2e-08	0.53	0.57	-3
CO000438	768	XP_002326333.1	predicted protein	Populus trichocarpa	142	285	2e-75	0.98	1	1
CO000439	1066	XP_002308268.1	predicted protein	Populus trichocarpa	838	441	e-122	0.76	0.87	2
CO000441	1052	XP_002275644.1	PREDICTED: hypothetical protein	Vitis vinifera	165	209	3e-52	0.64	0.77	3
CO000442	1135	ABY65004.1	14-3-3e protein	Gossypium hirsutum	262	486	e-135	0.95	0.96	3
CO000443	854	EEF45263.1	proteasome subunit beta type, putative	Ricinus communis	202	382	e-104	0.93	0.97	3
CO000444	920	XP_002319470.1	predicted protein	Populus trichocarpa	219	372	e-101	0.83	0.91	2
CO000445	1634	EEF52197.1	tubulin alpha chain, putative	Ricinus communis	451	681	0	0.93	0.93	3
CO000446	1960	ABV27486.1	fasciclin-like arabinogalactan protein 15	Gossypium hirsutum	460	739	0	0.84	0.84	3
CO000447	910	XP_002269733.1	PREDICTED: hypothetical protein isoform 2	Vitis vinifera	480	502	e-140	0.95	0.98	1
CO000449	2516	AAP80385.1	ABC transporter	Gossypium hirsutum	705	1352	0	0.97	0.97	3
CO000450	1585	ABQ41114.1	monodehydroascorbate reductase	Vitis vinifera	434	777	0	0.88	0.95	1
CO000451	789	XP_002311347.1	predicted protein	Populus trichocarpa	113	138	5e-31	0.74	0.84	2
CO000452	455	XP_002264666.1	PREDICTED: hypothetical protein	Vitis vinifera	1085	76.6	7e-13	0.82	0.86	2
CO000453	1368	XP_002266909.1	PREDICTED: hypothetical protein	Vitis vinifera	337	605	e-171	0.88	0.94	3
CO000454	1167	Q84TQ7.1	DELLA protein GAI	Gossypium hirsutum	537	697	0	0.95	0.95	3
CO000455	1455	NP_567066.1	PP2A-3 (PROTEIN PHOSPHATASE 2A-3); protein serine/threoninephosphatase	Arabidopsis thaliana	313	628	e-178	0.94	0.97	1
CO000456	508	YP_002545803.1	salicylate hydroxylase protein	Agrobacterium radiobacter K84	385	223	5e-57	0.62	0.75	2
CO000457	1196	AAA79360.1	proline-rich cell wall protein	Gossypium hirsutum	214	58.2	2e-06	0.57	0.82	3
CO000458	1111	XP_002329066.1	predicted protein	Populus trichocarpa	386	329	4e-88	0.69	0.78	1
CO000459	830	XP_002275926.1	PREDICTED: hypothetical protein	Vitis vinifera	379	304	6e-81	0.56	0.63	2
CO000460	1294	XP_002268097.1	PREDICTED: hypothetical protein	Vitis vinifera	330	544	e-153	0.84	0.94	1
CO000461	850	XP_002273830.1	PREDICTED: hypothetical protein isoform 1	Vitis vinifera	232	309	3e-82	0.67	0.78	2
CO000462	1010	EEF42965.1	syntaxin, putative	Ricinus communis	266	409	e-112	0.8	0.87	3
CO000463	1616	AAN32988.1	beta-tubulin 1	Gossypium hirsutum	444	840	0	0.95	0.96	2
CO000464	820	EEF48730.1	conserved hypothetical protein	Ricinus communis	486	295	3e-78	0.89	0.93	1
CO000465	1040	XP_002298558.1	predicted protein	Populus trichocarpa	134	74.3	2e-11	0.38	0.45	2
CO000466	880	EEF40908.1	nucleic acid binding protein, putative	Ricinus communis	147	90.5	2e-16	0.66	0.75	1
CO000467	1163	XP_002285808.1	PREDICTED: hypothetical protein	Vitis vinifera	2257	329	3e-88	0.73	0.84	2
CO000468	872	XP_002277146.1	PREDICTED: similar to plastid serine hydroxymethyltransferase	Vitis vinifera	528	432	e-119	0.8	0.85	1
CO000469	951	EEF39131.1	elongation factor 1-beta, putative	Ricinus communis	226	290	1e-76	0.68	0.74	3
CO000470	917	XP_002280446.1	PREDICTED: hypothetical protein	Vitis vinifera	513	399	e-109	0.74	0.85	2
CO000471	883	XP_002302232.1	predicted protein	Populus trichocarpa	165	223	3e-56	0.74	0.74	1
CO000473	714	XP_002281514.1	PREDICTED: hypothetical protein	Vitis vinifera	622	201	4e-50	0.78	0.89	2
CO000475	1260	EEF51074.1	NAD dependent epimerase/dehydratase, putative	Ricinus communis	302	552	e-155	0.87	0.94	2
CO000476	1408	EEF34649.1	heat shock protein, putative	Ricinus communis	647	706	0	0.89	0.9	1
CO000477	762	EEF28025.1	fk506-binding protein, putative	Ricinus communis	149	234	6e-60	0.88	0.92	1
CO000478	653	XP_002310088.1	predicted protein	Populus trichocarpa	180	148	4e-34	0.5	0.64	2
CO000479	1381	XP_002278850.1	PREDICTED: hypothetical protein	Vitis vinifera	347	461	e-128	0.67	0.82	2
CO000480	831	NP_001054191.1	Os04g0667800	Oryza sativa (japonica cultivar-group)	148	308	5e-82	0.97	0.99	1
CO000481	1051	EEF32889.1	Transcription factor RF2a, putative	Ricinus communis	425	252	4e-65	0.56	0.64	2
CO000482	823	ACM78615.1	non-specific lipid-transfer protein-like protein	Tamarix hispida	196	137	9e-31	0.49	0.64	3
CO000483	556	AAV74186.1	metallothionein-like protein	Gossypium hirsutum	82	95.9	2e-18	1	1	1
CO000484	893	XP_002302232.1	predicted protein	Populus trichocarpa	165	223	3e-56	0.74	0.74	2
CO000485	1152	AAX19857.1	profilin 2	Malus x domestica	131	222	5e-56	0.8	0.85	3
CO000486	1222	EEF49886.1	26S protease regulatory subunit 6a, putative	Ricinus communis	429	501	e-140	0.76	0.81	3
CO000487	927	YP_002874307.1	putative cation transporter	Pseudomonas fluorescens SBW25	340	350	9e-95	0.96	0.97	-3
CO000488	1143	XP_002277341.1	PREDICTED: hypothetical protein	Vitis vinifera	1002	614	e-174	0.79	0.9	3
CO000489	1360	XP_002321997.1	predicted protein	Populus trichocarpa	460	371	e-101	0.52	0.6	2
CO000490	435	XP_002331162.1	predicted protein	Populus trichocarpa	254	97.1	5e-19	0.92	0.94	1
CO000491	1031	ABQ15204.1	rop	Musa acuminata	196	354	7e-96	0.87	0.93	3
CO000492	1073	EEF33261.1	Transmembrane protein TPARL, putative	Ricinus communis	228	352	3e-95	0.78	0.84	1
CO000493	832	ACE06982.1	obtusifoliol-14alpha-demethylase	Gossypium hirsutum	486	313	e-129	1	1	3
CO000495	360	YP_002872206.1	putative ABC-type amino-acid transporter permease protein	Pseudomonas fluorescens SBW25	220	127	5e-28	0.92	0.95	-1
CO000496	1885	ACJ11250.1	S-adenosyl-L-homocystein hydrolase	Gossypium hirsutum	485	895	0	0.91	0.92	3
CO000497	1252	EEF34593.1	phosphoglucomutase, putative	Ricinus communis	581	550	e-155	0.87	0.93	1
CO000498	849	EEF45271.1	Nonspecific lipid-transfer protein A precursor, putative	Ricinuscommunis	164	115	3e-27	0.59	0.67	1
CO000499	678	YP_001373319.1	outer membrane autotransporter	Ochrobactrum anthropi ATCC 49188	2003	103	1e-20	0.42	0.52	1
CO000500	847	EEF36692.1	5-methyltetrahydropteroyltriglutamate--homocysteinemethyltransferase, putative	Ricinus communis	765	457	e-127	0.85	0.91	3
CO000502	766	XP_002272092.1	PREDICTED: hypothetical protein isoform 2	Vitis vinifera	142	204	7e-51	0.81	0.89	3
CO000503	1386	XP_002326407.1	predicted protein	Populus trichocarpa	527	799	0	0.92	0.95	3
CO000504	898	EEF37884.1	Acyl-protein thioesterase, putative	Ricinus communis	258	311	1e-97	0.8	0.83	1
CO000505	1164	EEF33136.1	mta/sah nucleosidase, putative	Ricinus communis	266	399	e-109	0.77	0.86	1
CO000506	625	EEF41247.1	cytochrome B5 isoform 1, putative	Ricinus communis	136	233	1e-59	0.82	0.92	3
CO000507	829	XP_002313946.1	predicted protein	Populus trichocarpa	431	357	1e-96	0.77	0.87	3
CO000508	316	YP_002870148.1	putative TonB-dependent exported protein	Pseudomonas fluorescensSBW25	701	154	4e-36	0.71	0.84	1
CO000509	887	XP_002270211.1	PREDICTED: hypothetical protein	Vitis vinifera	290	113	2e-23	0.8	0.91	1
CO000510	1452	ABG76000.1	GRP-like protein 2	Gossypium hirsutum	359	761	0	1	1	2
CO000511	907	XP_002304305.1	predicted protein	Populus trichocarpa	203	393	e-107	0.95	0.98	1
CO000512	971	XP_002268176.1	PREDICTED: hypothetical protein	Vitis vinifera	314	412	e-113	0.92	0.98	2
CO000513	2597	XP_002326624.1	predicted protein	Populus trichocarpa	714	877	0	0.64	0.74	1
CO000514	953	XP_002272727.1	PREDICTED: similar to 60S ribosomal protein L19	Vitis vinifera	206	323	2e-86	0.9	0.92	2
CO000515	1161	ABM05955.1	proline-rich protein	Gossypium hirsutum	164	147	3e-33	0.65	0.83	1
CO000516	902	YP_002873332.1	D-lactate dehydrogenase	Pseudomonas fluorescens SBW25	329	432	e-119	0.87	0.92	2
CO000517	1519	ABU50334.1	stearoyl-ACP desaturase	Vernicia montana	396	733	0	0.91	0.94	1
CO000518	1242	NP_001053957.1	Os04g0628100	Oryza sativa (japonica cultivar-group)	392	591	e-167	0.97	0.98	1
CO000519	696	CAI93172.1	beta-1,3-glucuronosyltransferase	Gossypium raimondii	394	89.7	2e-16	0.78	0.91	2
CO000520	558	EEF39616.1	conserved hypothetical protein	Ricinus communis	114	144	4e-33	0.61	0.71	2
CO000521	445	EEF29221.1	conserved hypothetical protein	Ricinus communis	78	154	2e-36	0.92	0.98	2
CO000522	553	YP_002874627.1	hypothetical protein PFLU5124	Pseudomonas fluorescens SBW25	629	204	3e-51	0.75	0.83	-1
CO000523	986	NP_850628.1	zinc finger (C3HC4-type RING finger) family protein / ankyrinrepeat family protein	Arabidopsis thaliana	438	426	e-117	0.79	0.88	2
CO000524	818	P51074.2	Annexin-like protein RJ4	Fragaria x ananassa	314	407	e-112	0.75	0.85	1
CO000525	1329	XP_002298093.1	predicted protein	Populus trichocarpa	340	315	7e-84	0.52	0.61	1
CO000526	802	EEF49984.1	conserved hypothetical protein	Ricinus communis	168	236	2e-60	0.81	0.92	2
CO000527	1094	ABY65000.1	14-3-3a protein	Gossypium hirsutum	251	490	e-137	0.99	1	1
CO000529	761	XP_002264096.1	PREDICTED: hypothetical protein	Vitis vinifera	103	69.7	3e-10	0.47	0.54	2
CO000531	668	AAD47346.1	ribosomal protein S26	Pisum sativum	130	190	8e-47	0.82	0.85	3
CO000532	910	ABR68799.1	fasciclin-like arabinogalactan protein 1	Gossypium hirsutum	244	220	2e-55	0.8	0.8	1
CO000533	1444	ABM91072.1	xyloglucan endotransglycosylase/hydrolase precursor XTH-39	Populustremula	336	509	e-142	0.83	0.9	3
CO000534	1034	EEF27979.1	Calcium-binding allergen Ole e, putative	Ricinus communis	211	229	5e-58	0.57	0.69	1
CO000535	1026	XP_002330721.1	predicted protein	Populus trichocarpa	260	420	e-115	0.81	0.89	2
CO000536	867	ABK93059.1	unknown	Populus trichocarpa	152	300	1e-79	0.96	0.98	1
CO000537	911	NP_196636.1	unknown protein	Arabidopsis thaliana	302	407	e-111	0.75	0.86	2
CO000538	1147	ABL86669.1	BHLH	Gossypium barbadense	334	488	e-136	0.8	0.8	3
CO000539	1808	XP_002264144.1	PREDICTED: hypothetical protein	Vitis vinifera	671	777	0	0.71	0.83	3
CO000540	807	EEF41246.1	60S ribosomal protein L13a, putative	Ricinus communis	206	374	e-102	0.89	0.91	2
CO000541	1310	ABK94952.1	unknown	Populus trichocarpa	328	552	e-155	0.85	0.93	1
CO000542	933	ABD66504.1	actin depolymerizing factor 8	Gossypium hirsutum	139	243	1e-62	0.88	0.88	2
CO000543	833	EEF38289.1	Phosphatidylglycerol/phosphatidylinositol transfer proteinprecursor, putative	Ricinus communis	155	176	3e-42	0.64	0.81	3
CO000544	471	XP_002325493.1	predicted protein	Populus trichocarpa	59	86.3	9e-16	0.66	0.76	2
CO000545	659	NP_200925.1	40S ribosomal protein S19 (RPS19C)	Arabidopsis thaliana	143	244	3e-63	0.87	0.93	1
CO000546	646	XP_002323194.1	predicted protein	Populus trichocarpa	145	218	3e-55	0.91	0.96	3
CO000547	1198	XP_002310238.1	predicted protein	Populus trichocarpa	317	516	e-144	0.81	0.88	2
CO000548	866	XP_002304722.1	predicted protein	Populus trichocarpa	247	270	2e-70	0.55	0.69	2
CO000549	484	AAY43792.1	E6-3	Gossypium hirsutum	246	103	6e-21	0.98	1	-3
CO000550	712	YP_002874941.1	ethanolamine ammonia-lyase heavy chain	Pseudomonas fluorescensSBW25	464	303	7e-81	0.91	0.91	2
CO000551	930	XP_002312729.1	predicted protein	Populus trichocarpa	252	329	2e-88	0.67	0.75	2
CO000552	834	YP_002875081.1	putative 2-amino-4-hydroxy-6-hydroxymethyldihydropteridinepyrophosphokinase	Pseudomonas fluorescens SBW25	172	314	7e-84	0.9	0.93	2
CO000553	551	XP_002267144.1	PREDICTED: hypothetical protein	Vitis vinifera	124	130	8e-29	0.77	0.85	2
CO000555	968	XP_002278964.1	PREDICTED: hypothetical protein	Vitis vinifera	341	541	e-152	0.91	0.97	1
CO000556	708	EEC67208.1	hypothetical protein OsI_34094	Oryza sativa Indica Group	274	294	4e-78	0.95	0.97	3
CO000557	1396	XP_002300577.1	predicted protein	Populus trichocarpa	418	546	e-153	0.74	0.81	3
CO000558	799	XP_002320815.1	predicted protein	Populus trichocarpa	487	200	1e-49	0.55	0.66	1
CO000559	1701	XP_002284627.1	PREDICTED: hypothetical protein	Vitis vinifera	435	717	0	0.8	0.91	1
CO000560	849	NP_172919.1	endomembrane protein 70, putative	Arabidopsis thaliana	592	323	1e-86	0.75	0.77	1
CO000561	843	EEF45446.1	conserved hypothetical protein	Ricinus communis	338	295	4e-78	0.68	0.82	2
CO000562	677	YP_002871020.1	4-carboxymuconolactone decarboxylase	Pseudomonas fluorescensSBW25	132	218	5e-55	0.98	0.99	2
CO000563	1206	EEF34707.1	conserved hypothetical protein	Ricinus communis	280	402	e-110	0.69	0.77	2
CO000564	858	EEF29651.1	conserved hypothetical protein	Ricinus communis	227	231	5e-59	0.62	0.74	1
CO000565	167	ZP_04589932.1	Acyl-CoA thioesterase	Pseudomonas syringae pv. oryzae str. 1_6	289	108	1e-22	0.98	0.98	-1
CO000566	772	YP_002870983.1	hypothetical protein PFLU1334	Pseudomonas fluorescens SBW25	537	504	e-141	0.98	0.99	-2
CO000568	1190	EEF32087.1	Aquaporin PIP2.1, putative	Ricinus communis	287	508	e-142	0.86	0.89	2
CO000569	937	EEF48541.1	cytochrome C oxidase polypeptide vib, putative	Ricinus communis	191	203	2e-50	0.57	0.63	1
CO000570	1066	AAA79366.1	unknown	Gossypium hirsutum	263	393	e-107	0.78	0.8	1
CO000571	480	YP_002873090.1	putative 3-oxoacyl acyl carrier protein reductase	Pseudomonas fluorescens SBW25	451	248	2e-64	0.81	0.88	-2
CO000572	1943	XP_002330795.1	predicted protein	Populus trichocarpa	949	939	0	0.9	0.95	2
CO000573	794	Q5J907.1	Translationally-controlled tumor protein homolog	Elaeis guineensis	168	300	1e-79	0.88	0.9	1
CO000574	1239	EEF46352.1	zinc finger protein, putative	Ricinus communis	353	531	e-149	0.74	0.83	2
CO000575	886	EEF45271.1	Nonspecific lipid-transfer protein A precursor, putative	Ricinuscommunis	164	153	2e-35	0.57	0.67	2
CO000576	1250	ABA01483.1	gibberellin 3-hydroxylase 1	Gossypium hirsutum	354	639	0	0.9	0.9	2
CO000577	559	EEF48237.1	aspartate aminotransferase, putative	Ricinus communis	404	194	4e-48	0.88	0.96	1
CO000578	1612	EEF38707.1	Alpha-N-arabinofuranosidase 1 precursor, putative	Ricinus communis	678	792	0	0.79	0.87	3
CO000579	2151	XP_002315942.1	predicted protein	Populus trichocarpa	496	932	0	0.91	0.95	1
CO000580	896	EEF42538.1	reticulon3-A3, putative	Ricinus communis	639	557	e-157	0.86	0.95	2
CO000581	682	ABW89469.1	low molecular weight heat shock protein	Gossypium hirsutum	156	184	5e-45	0.67	0.79	3
CO000582	844	CAD12855.1	ADP-ribosylation factor	Gossypium hirsutum	181	366	1e-99	1	1	3
CO000583	1093	XP_002278867.1	PREDICTED: hypothetical protein	Vitis vinifera	216	416	e-114	0.91	0.96	1
CO000584	1144	XP_002301829.1	predicted protein	Populus trichocarpa	446	412	e-113	0.9	0.91	3
CO000585	664	XP_002324081.1	predicted protein	Populus trichocarpa	175	182	3e-44	0.54	0.69	3
CO000586	848	EEF39570.1	Aspartic proteinase nepenthesin-2 precursor, putative	Ricinuscommunis	448	146	2e-33	0.37	0.52	3
CO000587	828	BAD81043.1	calnexin	Glycine max	546	425	e-117	0.83	0.9	1
CO000588	947	XP_002301802.1	predicted protein	Populus trichocarpa	448	69.7	4e-10	0.25	0.34	1
CO000589	859	EEF29461.1	phosphoprotein phosphatase, putative	Ricinus communis	369	378	e-103	0.7	0.8	3
CO000590	803	ACJ83877.1	unknown	Medicago truncatula	170	238	4e-61	0.81	0.89	2
CO000591	999	AAA79360.1	proline-rich cell wall protein	Gossypium hirsutum	214	58.5	1e-06	0.57	0.85	3
CO000592	547	EEF52699.1	Myosin heavy chain, striated muscle, putative	Ricinus communis	1041	53.5	9e-06	0.37	0.48	-2
CO000593	523	NP_001150297.1	postsynaptic protein CRIPT	Zea mays	96	200	4e-50	0.94	0.95	1
CO000594	1208	XP_002326407.1	predicted protein	Populus trichocarpa	527	701	0	0.95	0.98	3
CO000595	813	XP_002468614.1	hypothetical protein SORBIDRAFT_01g049010	Sorghum bicolor	160	331	4e-89	0.94	0.96	3
CO000596	654	XP_002274570.1	PREDICTED: hypothetical protein	Vitis vinifera	149	177	9e-43	0.81	0.83	1
CO000597	552	XP_002283136.1	PREDICTED: hypothetical protein	Vitis vinifera	104	147	5e-34	0.69	0.81	3
CO000598	937	EEF32237.1	Vesicle-associated membrane protein, putative	Ricinus communis	221	369	e-100	0.8	0.88	3
CO000599	1413	XP_002285702.1	PREDICTED: hypothetical protein	Vitis vinifera	189	213	4e-53	0.73	0.84	3
CO000600	835	XP_002301918.1	high mobility group family	Populus trichocarpa	152	165	4e-39	0.71	0.74	1
CO000601	741	XP_002313801.1	predicted protein	Populus trichocarpa	187	111	6e-23	0.39	0.52	3
CO000602	1397	EEF33213.1	nucleolysin tia-1, putative	Ricinus communis	422	653	0	0.86	0.89	1
CO000603	657	ABC41134.1	RING-box protein	Arachis hypogaea	116	227	6e-58	0.88	0.89	2
CO000605	901	XP_002317073.1	predicted protein	Populus trichocarpa	290	512	e-143	0.91	0.96	3
CO000606	1393	CAO64702.1	unnamed protein product	Vitis vinifera	572	538	e-151	0.61	0.7	3
CO000607	984	EEF42872.1	carbonic anhydrase, putative	Ricinus communis	274	345	4e-93	0.59	0.74	3
CO000608	629	EEF48359.1	conserved hypothetical protein	Ricinus communis	100	145	2e-33	0.71	0.75	1
CO000609	575	NP_563969.1	unknown protein	Arabidopsis thaliana	64	61.6	4e-08	0.93	0.96	3
CO000610	690	XP_002311252.1	predicted protein	Populus trichocarpa	144	148	4e-34	0.54	0.68	2
CO000611	1082	ABM64800.1	dihydroflavonol 4-reductase	Gossypium hirsutum	355	707	0	1	1	3
CO000612	944	ABN12321.1	benzoquinone reductase	Gossypium hirsutum	203	377	e-103	0.93	0.93	1
CO000614	970	XP_002274807.1	PREDICTED: hypothetical protein	Vitis vinifera	460	501	e-140	0.89	0.95	3
CO000615	1335	XP_002309925.1	predicted protein	Populus trichocarpa	364	595	e-168	0.77	0.88	1
CO000616	1035	XP_002298026.1	predicted protein	Populus trichocarpa	918	557	e-157	0.8	0.87	1
CO000617	725	AAP34364.1	putative major latex-like protein	Gossypium barbadense	129	255	3e-66	0.99	1	3
CO000618	591	NP_563969.1	unknown protein	Arabidopsis thaliana	64	60.5	9e-08	0.9	0.96	3
CO000620	892	ABR68796.1	arabinogalactan protein 4	Gossypium hirsutum	239	371	e-101	1	1	3
CO000621	1228	ABD63904.1	aquaporin 1	Gossypium hirsutum	287	583	e-164	0.99	1	3
CO000622	690	XP_002330023.1	predicted protein	Populus trichocarpa	183	268	2e-71	0.9	0.97	1
CO000624	866	EEF50699.1	Flavonol 4'-sulfotransferase, putative	Ricinus communis	354	398	e-109	0.75	0.85	1
CO000625	770	EEF47743.1	SP1L, putative	Ricinus communis	118	111	8e-23	0.62	0.68	2
CO000626	1235	ABK93361.1	unknown	Populus trichocarpa	181	80.1	4e-13	0.39	0.47	3
CO000627	893	XP_002283412.1	PREDICTED: hypothetical protein	Vitis vinifera	301	285	3e-75	0.54	0.68	3
CO000628	1601	XP_002298158.1	predicted protein	Populus trichocarpa	391	639	0	0.77	0.86	3
CO000629	894	XP_002302337.1	predicted protein	Populus trichocarpa	173	276	2e-72	0.78	0.88	2
CO000630	1376	XP_002299569.1	predicted protein	Populus trichocarpa	293	375	e-102	0.77	0.85	3
CO000631	1025	ABV60089.1	trans-2-enoyl-CoA reductase	Gossypium hirsutum	310	572	e-161	0.94	0.94	1
CO000632	1165	AAB67994.1	annexin	Gossypium hirsutum	315	512	e-143	0.94	0.96	2
CO000633	554	YP_261236.1	LysR family transcriptional regulator	Pseudomonas fluorescensPf-5	321	156	1e-36	0.81	0.93	-1
CO000634	597	EEF30261.1	conserved hypothetical protein	Ricinus communis	67	88.2	4e-16	0.54	0.8	2
CO000635	859	NP_001048495.1	Os02g0814700	Oryza sativa (japonica cultivar-group)	140	283	1e-74	0.99	1	1
CO000636	1380	ABK24553.1	unknown	Picea sitchensis	510	363	2e-98	0.44	0.63	1
CO000637	367	XP_002301801.1	predicted protein	Populus trichocarpa	76	98.2	2e-19	1	1	3
CO000638	851	XP_002309194.1	predicted protein	Populus trichocarpa	223	308	3e-82	0.96	0.98	3
CO000639	1568	XP_002282119.1	PREDICTED: similar to polyubiquitin	Vitis vinifera	761	733	0	0.99	0.99	2
CO000640	835	XP_002299494.1	predicted protein	Populus trichocarpa	148	311	6e-83	0.98	1	3
CO000641	1038	XP_002316090.1	predicted protein	Populus trichocarpa	214	161	1e-37	0.75	0.86	3
CO000642	1065	EEF40919.1	conserved hypothetical protein	Ricinus communis	294	489	e-139	0.87	0.95	3
CO000643	1808	Q6VAF6.1	Tubulin beta-6 chain	Gossypium hirsutum	450	853	0	0.96	0.96	2
CO000644	1181	ABK96574.1	unknown	Populus trichocarpa x Populus deltoides	286	239	5e-61	0.79	0.88	2
CO000645	853	EEF44787.1	conserved hypothetical protein	Ricinus communis	147	272	3e-71	0.9	0.96	2
CO000646	1003	EEF48536.1	40S ribosomal protein S6, putative	Ricinus communis	249	397	e-109	0.83	0.84	3
CO000647	936	EEF41500.1	conserved hypothetical protein	Ricinus communis	421	464	e-129	0.73	0.83	3
CO000648	1063	EEF28698.1	conserved hypothetical protein	Ricinus communis	654	261	1e-67	0.5	0.62	3
CO000649	592	XP_002298369.1	predicted protein	Populus trichocarpa	417	280	4e-74	0.83	0.93	1
CO000650	1007	XP_002319520.1	predicted protein	Populus trichocarpa	241	362	3e-98	0.75	0.86	1
CO000651	927	ACQ82802.1	vacuolar invertase	Gossypium hirsutum	645	618	e-175	0.94	0.94	1
CO000652	515	NP_568867.1	cytochrome c oxidase subunit 6b, putative	Arabidopsis thaliana	78	157	4e-37	0.87	0.92	3
CO000653	1537	XP_002266308.1	PREDICTED: similar to cysteine protease Cp5	Vitis vinifera	796	683	0	0.68	0.77	2
CO000654	1621	XP_002309394.1	predicted protein	Populus trichocarpa	469	592	e-167	0.66	0.8	1
CO000655	1451	EEF51079.1	hydroxymethylglutaryl-CoA synthase, putative	Ricinus communis	464	828	0	0.91	0.95	2
CO000657	1765	YP_588403.1	hypothetical protein ZeamMp158	Zea mays	111	174	3e-41	0.88	0.91	2
CO000658	600	AAV74186.1	metallothionein-like protein	Gossypium hirsutum	82	120	8e-26	0.96	0.98	2
CO000659	908	ABY59947.1	nectar protein 1	Jacaranda mimosifolia	339	429	e-118	0.74	0.86	3
CO000660	1466	O22342.1	ADP,ATP carrier protein 1, mitochondrial	Gossypium hirsutum	386	647	0	0.86	0.9	1
CO000661	811	EEF39657.1	serine hydroxymethyltransferase, putative	Ricinus communis	471	507	e-142	0.92	0.98	1
CO000662	1017	AAQ16653.1	delta-12 fatty acid desaturase 2	Gossypium hirsutum	384	602	e-170	1	1	2
CO000663	1166	EEF46141.1	conserved hypothetical protein	Ricinus communis	221	311	8e-83	0.74	0.83	3
CO000664	985	XP_002275035.1	PREDICTED: hypothetical protein	Vitis vinifera	406	544	e-153	0.86	0.9	3
CO000665	865	XP_002272730.1	PREDICTED: hypothetical protein	Vitis vinifera	594	506	e-142	0.9	0.96	3
CO000666	893	XP_002277981.1	PREDICTED: hypothetical protein	Vitis vinifera	166	326	2e-87	0.95	0.98	3
CO000667	815	XP_002267591.1	PREDICTED: hypothetical protein	Vitis vinifera	154	268	3e-70	0.87	0.88	3
CO000668	806	XP_002275422.1	PREDICTED: hypothetical protein	Vitis vinifera	431	321	6e-86	0.73	0.8	3
CO000669	910	ABA81856.1	unknown	Solanum tuberosum	194	357	1e-96	0.9	0.96	1
CO000670	1356	XP_002310666.1	predicted protein	Populus trichocarpa	356	684	0	0.92	0.97	2
CO000671	1284	ABO31372.1	sucrose transporter 1	Gossypium hirsutum	321	553	e-155	0.88	0.89	3
CO000672	861	XP_002303380.1	predicted protein	Populus trichocarpa	247	349	2e-94	0.75	0.84	3
CO000673	1192	XP_002305665.1	predicted protein	Populus trichocarpa	325	527	e-147	0.79	0.88	1
CO000674	1620	XP_002331641.1	predicted protein	Populus trichocarpa	444	830	0	0.92	0.98	3
CO000675	1099	XP_002299428.1	predicted protein	Populus trichocarpa	454	439	e-121	0.72	0.77	1
CO000677	1187	ABA12218.1	translation elongation factor 1A-2	Gossypium hirsutum	447	606	e-171	0.95	0.96	1
CO000678	934	XP_002297971.1	predicted protein	Populus trichocarpa	583	303	1e-80	0.76	0.9	3
CO000679	840	YP_002874668.1	putative oxidoreduxtase	Pseudomonas fluorescens SBW25	367	477	e-133	0.85	0.87	2
CO000680	1496	EEF45813.1	Vacuolar-processing enzyme precursor, putative	Ricinus communis	492	805	0	0.81	0.9	1
CO000681	952	XP_002320920.1	predicted protein	Populus trichocarpa	297	303	2e-80	0.7	0.85	3
CO000682	278	YP_001633212.1	two-component response regulator	Bordetella petrii DSM 12804	224	144	4e-33	0.78	0.87	2
CO000683	1117	CAN79431.1	hypothetical protein	Vitis vinifera	664	620	e-176	0.83	0.92	2
CO000684	919	Q9STB6.1	Profilin-2	Hevea brasiliensis	131	225	4e-57	0.83	0.87	3
CO000685	2078	EEF43396.1	kinesin light chain, putative	Ricinus communis	605	899	0	0.78	0.83	3
CO000686	555	XP_002274494.1	PREDICTED: hypothetical protein	Vitis vinifera	118	127	4e-28	0.64	0.74	2
CO000687	1594	CAO44584.1	unnamed protein product	Vitis vinifera	316	121	2e-25	0.38	0.52	1
CO000688	733	AAB05224.1	fiber-specific acyl carrier protein	Gossypium hirsutum	136	250	8e-65	0.94	0.96	3
CO000689	777	ABM05951.1	proline-rich protein	Gossypium hirsutum	111	63.2	3e-08	1	1	2
CO000690	681	ABD66507.1	actin depolymerizing factor 5	Gossypium hirsutum	141	253	1e-65	0.92	0.95	1
CO000691	1073	XP_002302788.1	predicted protein	Populus trichocarpa	181	366	3e-99	1	1	1
CO000692	1422	EEF44999.1	H(\+)-transporting atpase plant/fungi plasma membrane type, putative	Ricinus communis	762	646	0	0.79	0.8	1
CO000693	875	ACM89775.1	beta-tubulin 3	Gossypium hirsutum	447	524	e-147	0.94	0.94	3
CO000694	980	EEF50317.1	Nuc-1 negative regulatory protein preg, putative	Ricinus communis	224	384	e-104	0.85	0.92	1
CO000696	689	P46522.1	Late embryogenesis abundant protein Lea5-D	Gossypium hirsutum	105	178	4e-43	0.84	0.85	1
CO000697	928	XP_002285741.1	PREDICTED: hypothetical protein	Vitis vinifera	405	505	e-141	0.84	0.89	1
CO000698	317	YP_001628749.1	hypothetical protein Bpet0147	Bordetella petrii DSM 12804	259	132	9e-30	0.8	0.83	2
CO000700	845	ACM07441.1	starch-branching enzyme I	Nelumbo nucifera	858	525	e-147	0.87	0.91	1
CO000701	974	ABK94420.1	unknown	Populus trichocarpa	322	83.2	4e-14	0.37	0.49	1
CO000702	1350	XP_002301457.1	predicted protein	Populus trichocarpa	357	545	e-153	0.75	0.84	2
CO000703	1160	XP_002319029.1	predicted protein	Populus trichocarpa	380	543	e-152	0.84	0.92	3
CO000704	914	EEF29561.1	Protein P21, putative	Ricinus communis	248	437	e-121	0.89	0.94	1
CO000705	528	ABD66508.1	actin depolymerizing factor 6	Gossypium hirsutum	139	110	7e-23	0.98	0.98	2
CO000706	681	NP_179262.1	hesB-like domain-containing protein	Arabidopsis thaliana	137	207	7e-52	0.74	0.86	2
CO000707	1000	Q8W4Z5.1	UPF0497 membrane protein	Gossypium hirsutum	207	372	e-101	0.92	0.92	3
CO000708	812	EEF44870.1	kinesin light chain, putative	Ricinus communis	621	321	4e-86	0.86	0.92	2
CO000709	814	YP_002872732.1	phosphoglucomutase	Pseudomonas fluorescens SBW25	548	186	3e-45	0.97	1	-1
CO000710	200	YP_001669729.1	2-oxo-hepta-3-ene-1,7-dioic acid hydratase	Pseudomonas putidaGB-1	267	134	3e-30	0.98	0.98	-2
CO000711	810	EEF32237.1	Vesicle-associated membrane protein, putative	Ricinus communis	221	367	e-100	0.8	0.87	1
CO000712	1190	AAP41851.1	beta-cyanoalanine synthase	Hevea brasiliensis	370	455	e-126	0.68	0.77	2
CO000713	146	ZP_01694594.1	dihydrodipicolinate synthase	Microscilla marina ATCC 23134	306	61.6	3e-08	0.67	0.73	1
CO000714	971	ABR68795.1	aquaporin gamma-TIP	Gossypium hirsutum	252	391	e-107	0.8	0.8	3
CO000715	395	ZP_03267227.1	alpha/beta hydrolase fold	Burkholderia sp. H160	302	200	5e-50	0.74	0.83	-1
CO000716	978	Q9XG77.1	Proteasome subunit alpha type-6	Nicotiana tabacum	246	468	e-130	0.94	0.98	1
CO000717	687	XP_002279861.1	PREDICTED: hypothetical protein	Vitis vinifera	201	258	4e-67	0.71	0.81	1
CO000718	879	YP_350386.1	chemotaxis sensory transducer, Pas/Pac sensor	Pseudomonasfluorescens Pf0-1	529	304	6e-81	0.59	0.68	-2
CO000719	949	BAB83086.1	cycloartenol synthase	Betula platyphylla	757	375	e-102	0.83	0.92	2
CO000720	1336	ACG63794.1	phospholipase D alpha	Gossypium arboreum	807	722	0	0.99	1	1
CO000721	1037	CAE75666.1	putative membrane protein	Gossypium hirsutum	180	339	2e-91	0.96	0.97	2
CO000722	609	ZP_01227369.1	conserved hypothetical protein	Aurantimonas sp. SI85-9A1	152	158	5e-44	0.77	0.82	2
CO000723	1085	EEF39131.1	elongation factor 1-beta, putative	Ricinus communis	226	162	7e-38	0.9	0.95	2
CO000724	452	YP_002870047.1	histidine ammonia-lyase	Pseudomonas fluorescens SBW25	512	216	5e-55	0.76	0.77	-2
CO000725	700	XP_002276841.1	PREDICTED: hypothetical protein isoform 1	Vitis vinifera	123	221	4e-56	0.91	0.95	1
CO000726	1158	CAR23299.1	KLTH0E05852p	Lachancea thermotolerans	409	587	e-165	0.86	0.89	2
CO000727	907	EEF35104.1	conserved hypothetical protein	Ricinus communis	186	226	2e-57	0.64	0.78	2
CO000730	457	XP_002272496.1	PREDICTED: hypothetical protein isoform 1	Vitis vinifera	69	97.1	5e-19	0.76	0.76	1
CO000731	1038	XP_002284698.1	PREDICTED: hypothetical protein	Vitis vinifera	326	289	3e-76	0.5	0.65	1
CO000732	186	YP_348201.1	Short-chain dehydrogenase/reductase SDR	Pseudomonas fluorescensPf0-1	244	105	2e-21	0.9	0.91	-3
CO000733	592	ABK93842.1	unknown	Populus trichocarpa	88	126	1e-27	0.72	0.83	2
CO000734	1148	XP_002307048.1	predicted protein	Populus trichocarpa	222	201	3e-66	0.74	0.8	3
CO000735	289	YP_002873305.1	putative tonB-dependent receptor	Pseudomonas fluorescens SBW25	715	174	2e-42	0.86	0.91	-1
CO000736	756	ABK93213.1	unknown	Populus trichocarpa	178	364	5e-99	0.97	1	2
CO000737	1053	XP_002268787.1	PREDICTED: hypothetical protein	Vitis vinifera	444	585	e-165	0.96	0.98	1
CO000738	437	CAO17339.1	unnamed protein product	Vitis vinifera	148	68.2	3e-10	0.53	0.66	3
CO000739	863	EEF44240.1	60S ribosomal protein L13a, putative	Ricinus communis	206	368	e-100	0.87	0.92	2
CO000740	932	ABM05955.1	proline-rich protein	Gossypium hirsutum	164	124	1e-26	0.74	0.89	2
CO000741	471	NP_192104.1	GPAT3 (GLYCEROL-3-PHOSPHATE ACYLTRANSFERASE 3); acyltransferase	Arabidopsis thaliana	520	111	3e-23	0.44	0.58	1
CO000742	1157	XP_002323755.1	predicted protein	Populus trichocarpa	332	484	e-135	0.73	0.82	2
CO000743	1015	XP_002327535.1	predicted protein	Populus trichocarpa	194	183	2e-48	0.65	0.78	3
CO000744	1030	EEF35431.1	succinate dehydrogenase, putative	Ricinus communis	284	501	e-140	0.83	0.9	3
CO000745	1164	XP_002320804.1	predicted protein	Populus trichocarpa	306	355	5e-96	0.58	0.7	2
CO000746	1068	EEF33402.1	ubiquitin-protein ligase, putative	Ricinus communis	2098	525	e-147	0.95	0.98	2
CO000747	1564	EEF49074.1	Anthranilate N-benzoyltransferase protein, putative	Ricinuscommunis	451	705	0	0.76	0.87	1
CO000748	682	EEF32057.1	40S ribosomal protein S17, putative	Ricinus communis	143	226	1e-57	0.91	0.96	3
CO000749	793	EEF41904.1	peptidase, putative	Ricinus communis	2072	191	7e-47	0.54	0.73	2
CO000750	998	ACB42441.1	aquaporin PIP2;4	Gossypium hirsutum	278	562	e-158	0.99	1	2
CO000751	1080	XP_002320474.1	predicted protein	Populus trichocarpa	174	107	2e-21	0.72	0.87	2
CO000752	858	EEF41790.1	Protein pob, putative	Ricinus communis	246	431	e-119	0.89	0.92	1
CO000753	1031	EEF36765.1	cyclophilin, putative	Ricinus communis	204	317	1e-84	0.87	0.9	1
CO000754	290	YP_002874367.1	putative signaling protein	Pseudomonas fluorescens SBW25	683	177	2e-43	0.96	0.98	-2
CO000755	1054	ACI31552.1	heat shock protein 90-1	Glycine max	702	421	e-116	0.75	0.77	3
CO000756	519	EEF49516.1	conserved hypothetical protein	Ricinus communis	53	96.7	8e-19	0.86	0.94	3
CO000757	396	EEF46889.1	chaperone clpb, putative	Ricinus communis	976	93.6	6e-18	0.69	0.86	3
CO000758	1010	XP_002315715.1	predicted protein	Populus trichocarpa	238	273	2e-71	0.59	0.69	3
CO000759	863	AAK92793.1	unknown protein	Arabidopsis thaliana	457	293	1e-77	0.64	0.73	3
CO000760	800	XP_002303254.1	predicted protein	Populus trichocarpa	180	350	1e-94	0.96	0.98	2
CO000761	882	EEF44868.1	Alpha-L-fucosidase 2 precursor, putative	Ricinus communis	368	382	e-104	0.7	0.82	2
CO000762	763	EEF38080.1	40S ribosomal protein S18, putative	Ricinus communis	152	273	1e-71	0.9	0.9	1
CO000763	873	NP_884822.2	phenylalanyl-tRNA synthetase subunit alpha	Bordetellaparapertussis 12822	340	254	8e-66	0.8	0.83	-3
CO000764	740	XP_002265347.1	PREDICTED: hypothetical protein	Vitis vinifera	122	238	4e-61	0.97	0.97	3
CO000765	797	XP_002324004.1	predicted protein	Populus trichocarpa	176	328	4e-88	0.88	0.95	1
CO000767	103	YP_002872280.1	hypothetical protein PFLU2697	Pseudomonas fluorescens SBW25	248	63.9	5e-09	0.85	0.91	-1
CO000768	1244	XP_002274807.1	PREDICTED: hypothetical protein	Vitis vinifera	460	602	e-170	0.85	0.9	1
CO000769	1046	XP_002284470.1	PREDICTED: hypothetical protein	Vitis vinifera	539	351	8e-95	0.76	0.85	1
CO000770	1453	CAO42130.1	unnamed protein product	Vitis vinifera	395	489	e-136	0.66	0.72	2
CO000771	779	NP_001105547.1	calmodulin2	Zea mays	149	296	1e-78	0.99	1	2
CO000772	594	AAM75351.1	extensin-like protein	Glycine max	179	66.2	2e-09	0.46	0.65	3
CO000773	805	XP_002327273.1	predicted protein	Populus trichocarpa	204	323	2e-86	0.78	0.79	1
CO000774	1290	ABK94273.1	unknown	Populus trichocarpa	457	532	e-149	0.69	0.76	1
CO000775	658	XP_002316363.1	predicted protein	Populus trichocarpa	110	151	5e-35	0.72	0.8	3
CO000776	645	AAZ83341.1	ubiquitin extension protein	Gossypium hirsutum	156	259	2e-67	0.85	0.85	2
CO000777	798	XP_002266406.1	PREDICTED: hypothetical protein	Vitis vinifera	157	321	4e-86	0.96	0.97	3
CO000778	859	XP_002272975.1	PREDICTED: hypothetical protein	Vitis vinifera	426	466	e-129	0.91	0.97	2
CO000779	801	XP_002281769.1	PREDICTED: hypothetical protein isoform 1	Vitis vinifera	353	281	2e-97	0.78	0.85	2
CO000780	778	XP_002303084.1	predicted protein	Populus trichocarpa	164	182	2e-44	0.61	0.68	1
CO000781	1193	EEF31399.1	conserved hypothetical protein	Ricinus communis	323	445	e-123	0.82	0.89	1
CO000782	1455	AAN17504.1	microsomal omega-3 fatty acid desaturase	Betula pendula	386	619	e-175	0.72	0.81	2
CO000783	2069	XP_002297822.1	predicted protein	Populus trichocarpa	450	691	0	0.75	0.79	1
CO000784	869	EEF30598.1	transferase, putative	Ricinus communis	373	309	2e-82	0.6	0.76	3
CO000785	835	EEF28686.1	40S ribosomal protein S7, putative	Ricinus communis	191	347	1e-93	0.9	0.97	3
CO000786	659	XP_002326938.1	predicted protein	Populus trichocarpa	360	263	9e-69	0.77	0.88	1
CO000787	436	YP_001072675.1	M15D family D-Ala-D-Ala dipeptidase VanX	Mycobacterium sp. JLS	264	134	2e-30	0.54	0.68	-3
CO000788	1058	XP_002306693.1	predicted protein	Populus trichocarpa	341	632	e-179	0.91	0.95	2
CO000789	903	XP_002313824.1	predicted protein	Populus trichocarpa	203	327	1e-87	0.78	0.89	3
CO000790	2291	XP_002282833.1	PREDICTED: hypothetical protein	Vitis vinifera	762	931	0	0.62	0.75	1
CO000791	800	XP_002280012.1	PREDICTED: hypothetical protein	Vitis vinifera	151	298	4e-79	0.98	1	2
CO000792	840	EEF38335.1	50S ribosomal protein L3, putative	Ricinus communis	285	343	1e-92	0.79	0.85	3
CO000793	631	NP_001150550.1	40S ribosomal protein S30	Zea mays	62	105	3e-21	0.83	0.83	1
CO000794	1223	EEF48008.1	pantothenate kinase, putative	Ricinus communis	367	634	e-180	0.86	0.91	2
CO000795	978	P46299.1	40S ribosomal protein S4	Gossypium hirsutum	262	470	e-130	0.91	0.92	3
CO000796	1020	ABS53040.1	Cald5H	Leucaena leucocephala	511	390	e-106	0.81	0.9	3
CO000797	632	ABW89469.1	low molecular weight heat shock protein	Gossypium hirsutum	156	213	1e-53	0.89	0.89	3
CO000798	1135	XP_002315460.1	predicted protein	Populus trichocarpa	215	268	6e-70	0.71	0.84	2
CO000800	661	XP_002284336.1	PREDICTED: hypothetical protein isoform 2	Vitis vinifera	132	178	3e-43	1	1	1
CO000801	839	EEF45032.1	40S ribosomal protein S9, putative	Ricinus communis	196	354	7e-96	0.97	0.99	2
CO000802	920	YP_002872681.1	putative carboxyvinyl-carboxyphosphonate phosphorylmutase	Pseudomonas fluorescens SBW25	289	186	2e-45	0.79	0.89	-2
CO000803	709	XP_002268405.1	PREDICTED: hypothetical protein	Vitis vinifera	115	200	1e-49	0.89	0.96	2
CO000804	906	YP_001668461.1	amine dehydrogenase	Pseudomonas putida GB-1	383	266	3e-69	0.58	0.72	2
CO000806	1335	XP_002284116.1	PREDICTED: hypothetical protein	Vitis vinifera	170	288	1e-75	0.86	0.91	1
CO000807	659	XP_002301767.1	predicted protein	Populus trichocarpa	158	251	5e-65	0.78	0.89	3
CO000808	862	AAM66002.1	unknown	Arabidopsis thaliana	292	300	9e-80	0.66	0.77	3
CO000809	670	EEF36862.1	conserved hypothetical protein	Ricinus communis	325	162	2e-38	0.62	0.72	1
CO000810	806	XP_002265323.1	PREDICTED: hypothetical protein	Vitis vinifera	152	318	4e-85	0.99	0.99	2
CO000812	1565	XP_002297881.1	predicted protein	Populus trichocarpa	440	704	0	0.81	0.87	1
CO000813	868	XP_002324550.1	predicted protein	Populus trichocarpa	346	208	5e-52	0.56	0.67	2
CO000814	719	YP_002873363.1	isocitrate dehydrogenase	Pseudomonas fluorescens SBW25	741	370	e-101	0.9	0.91	2
CO000815	862	EEF28686.1	40S ribosomal protein S7, putative	Ricinus communis	191	350	8e-95	0.9	0.98	3
CO000816	1314	AAA99868.1	peroxidase	Gossypium hirsutum	332	609	e-172	0.9	0.91	3
CO000817	837	XP_002322794.1	predicted protein	Populus trichocarpa	209	286	2e-75	0.63	0.78	2
CO000818	697	XP_002284357.1	PREDICTED: hypothetical protein	Vitis vinifera	146	178	3e-43	1	1	2
CO000819	230	YP_002870798.1	glutamate/aspartate ABC transport system, periplasmic bindingprotein precursor	Pseudomonas fluorescens SBW25	308	150	3e-35	0.98	1	2
CO000820	809	EEF37341.1	lung seven transmembrane receptor, putative	Ricinus communis	436	281	4e-74	0.68	0.77	1
CO000821	689	P93087.3	Calmodulin	Capsicum annuum	149	298	3e-79	1	1	1
CO000822	332	YP_002874330.1	hypothetical protein PFLU4816	Pseudomonas fluorescens SBW25	245	189	8e-47	0.86	0.94	-1
CO000823	1219	XP_002278255.1	PREDICTED: hypothetical protein	Vitis vinifera	361	601	e-170	0.84	0.94	1
CO000824	705	XP_002271525.1	PREDICTED: hypothetical protein	Vitis vinifera	918	231	6e-59	0.71	0.82	1
CO000825	869	XP_002329031.1	predicted protein	Populus trichocarpa	413	520	e-145	0.92	0.97	1
CO000826	625	EEF44240.1	60S ribosomal protein L13a, putative	Ricinus communis	206	240	6e-62	0.82	0.88	2
CO000827	814	EEF50166.1	conserved hypothetical protein	Ricinus communis	220	252	3e-65	0.69	0.79	1
CO000828	1264	XP_002305665.1	predicted protein	Populus trichocarpa	325	526	e-147	0.79	0.88	1
CO000830	669	XP_002326087.1	predicted protein	Populus trichocarpa	289	342	2e-92	0.89	0.97	1
CO000831	780	XP_002277298.1	PREDICTED: hypothetical protein	Vitis vinifera	197	171	5e-41	0.5	0.6	3
CO000832	828	EEF37018.1	conserved hypothetical protein	Ricinus communis	136	234	1e-59	0.92	0.96	2
CO000833	788	AAQ08194.1	eukaryotic translation initiation factor 5A isoform IV	Heveabrasiliensis	160	312	2e-83	0.94	0.98	1
CO000834	619	YP_002875487.1	ATP-dependent DNA helicase	Pseudomonas fluorescens SBW25	691	374	e-102	0.92	0.93	2
CO000835	1633	XP_002277911.1	PREDICTED: hypothetical protein	Vitis vinifera	450	797	0	0.87	0.94	2
CO000836	1384	AAY85180.1	pectate lyase	Gossypium hirsutum	411	646	0	0.9	0.92	2
CO000837	785	XP_002329700.1	predicted protein	Populus trichocarpa	129	216	2e-54	0.77	0.86	1
CO000838	794	XP_002267222.1	PREDICTED: hypothetical protein	Vitis vinifera	361	361	5e-98	0.68	0.82	1
CO000839	964	XP_002285871.1	PREDICTED: similar to PBC1 (20S proteasome beta subunit C1);peptidase isoform 1	Vitis vinifera	204	392	e-107	0.93	0.98	2
CO000840	1139	CAG25586.1	histone H1	Pisum sativum	251	70.5	3e-10	0.89	0.94	3
CO000841	1368	ABO47744.1	polygalacturonase-inhibiting protein	Gossypium hirsutum	370	424	e-131	0.93	0.94	2
CO000842	1164	XP_002317862.1	predicted protein	Populus trichocarpa	391	336	3e-90	0.51	0.62	2
CO000843	937	XP_002304373.1	predicted protein	Populus trichocarpa	453	560	e-158	0.87	0.93	1
CO000844	1721	EEF32091.1	protein disulfide isomerase, putative	Ricinus communis	575	796	0	0.79	0.88	1
CO000845	874	EEF38954.1	glycosyltransferase, putative	Ricinus communis	567	306	1e-81	0.66	0.73	1
CO000846	1121	XP_002266051.1	PREDICTED: hypothetical protein	Vitis vinifera	363	232	5e-59	0.44	0.51	3
CO000847	625	XP_002282974.1	PREDICTED: similar to protein synthesis initiation factor-like	Vitis vinifera	92	189	1e-46	1	1	-3
CO000848	884	EEF32394.1	40S ribosomal protein sa, putative	Ricinus communis	309	434	e-120	0.8	0.82	2
CO000850	1567	XP_002303595.1	predicted protein	Populus trichocarpa	541	895	0	0.84	0.9	3
CO000851	635	XP_002298383.1	predicted protein	Populus trichocarpa	832	176	1e-42	0.83	0.89	3
CO000852	1462	XP_002280450.1	PREDICTED: hypothetical protein isoform 2	Vitis vinifera	368	441	e-122	0.72	0.79	2
CO000853	739	AAB05224.1	fiber-specific acyl carrier protein	Gossypium hirsutum	136	189	2e-46	0.73	0.85	3
CO000854	1359	AAV68252.1	cytochrome oxidase subunit 1-2	Daucus carota	814	483	e-134	0.88	0.88	3
CO000855	1393	EEF34748.1	arf gtpase-activating protein, putative	Ricinus communis	404	619	e-175	0.76	0.86	1
CO000856	1341	ACQ91107.1	S-adenosylmethionine decarboxylase	Citrus sinensis	364	409	e-112	0.78	0.85	1
CO000857	467	CAO71163.1	unnamed protein product	Vitis vinifera	62	98.2	2e-19	0.9	0.96	1
CO000858	902	XP_002304564.1	predicted protein	Populus trichocarpa	364	244	8e-63	0.48	0.54	2
CO000859	788	XP_002321754.1	predicted protein	Populus trichocarpa	75	104	8e-21	0.8	0.87	2
CO000860	771	AAA84881.1	FbLate-2 gene product	Gossypium barbadense	333	47.4	1e-08	0.79	0.87	3
CO000861	1051	EEF41529.1	alpha-soluble nsf attachment protein, putative	Ricinus communis	289	487	e-136	0.86	0.94	2
CO000863	479	CAE75664.1	long chain fatty acid elongation enzyme	Gossypium hirsutum	285	57.8	4e-07	1	1	2
CO000864	1233	XP_002331090.1	predicted protein	Populus trichocarpa	421	530	e-148	0.68	0.74	1
CO000865	948	AAZ83345.1	24-sterol C-methyltransferase	Gossypium hirsutum	346	583	e-164	0.93	0.94	2
CO000866	1787	CAN74078.1	hypothetical protein	Vitis vinifera	508	876	0	0.84	0.88	1
CO000867	962	EEF47471.1	Small rubber particle protein, putative	Ricinus communis	229	225	4e-57	0.59	0.72	1
CO000868	1020	AAN15183.1	MADS box protein GHMADS-2	Gossypium hirsutum	223	434	e-120	0.99	0.99	1
CO000870	1423	CAN73746.1	hypothetical protein	Vitis vinifera	269	371	e-100	0.75	0.8	1
CO000871	722	CAD33929.1	microtubule associated protein	Cicer arietinum	121	202	3e-50	0.84	0.87	2
CO000872	812	XP_002303524.1	predicted protein	Populus trichocarpa	151	83.2	3e-14	0.43	0.59	1
CO000873	778	XP_002317915.1	predicted protein	Populus trichocarpa	150	154	9e-36	0.57	0.67	2
CO000874	685	XP_002308430.1	predicted protein	Populus trichocarpa	633	322	2e-86	0.79	0.86	3
CO000875	509	XP_002310150.1	predicted protein	Populus trichocarpa	175	203	4e-51	0.62	0.74	2
CO000876	1143	AAO14624.2	hypothetical protein	Prunus persica	441	285	7e-79	0.51	0.63	3
CO000877	798	EEF36422.1	Myosin heavy chain, clone, putative	Ricinus communis	614	263	1e-68	0.74	0.78	3
CO000878	1905	ABP01349.1	D8-sphingolipid desaturase	Jatropha curcas	447	711	0	0.73	0.82	2
CO000879	806	EEF47411.1	pentatricopeptide repeat-containing protein, putative	Ricinuscommunis	832	196	2e-48	0.75	0.8	1
CO000880	876	XP_002307393.1	predicted protein	Populus trichocarpa	159	196	2e-48	0.59	0.75	1
CO000881	1232	EEF38949.1	Arylacetamide deacetylase, putative	Ricinus communis	338	289	3e-91	0.54	0.68	3
CO000882	971	EEF50859.1	Dehydration-responsive protein RD22 precursor, putative	Ricinuscommunis	295	117	2e-24	0.42	0.63	2
CO000883	1039	AAY94191.1	co-chaperone Hsc20	Pseudomonas fluorescens Pf-5	186	325	6e-87	0.87	0.89	1
CO000884	889	AAZ83342.1	ACC oxidase 1	Gossypium hirsutum	319	515	e-144	0.92	0.92	1
CO000885	749	XP_002284177.1	PREDICTED: hypothetical protein	Vitis vinifera	162	296	1e-78	0.88	0.96	2
CO000886	804	XP_002304808.1	predicted protein	Populus trichocarpa	189	343	8e-95	0.92	0.97	1
CO000887	695	Q39779.1	Acyl-CoA-binding protein	Gossypium hirsutum	89	184	8e-45	1	1	2
CO000888	872	XP_002276743.1	PREDICTED: hypothetical protein	Vitis vinifera	193	317	1e-84	0.81	0.83	3
CO000890	1184	XP_002308319.1	predicted protein	Populus trichocarpa	260	494	e-138	0.91	0.97	3
CO000891	815	EEF44305.1	NADH dehydrogenase, putative	Ricinus communis	143	286	2e-75	0.95	0.97	1
CO000892	458	YP_002875404.1	hypothetical protein PFLU5918	Pseudomonas fluorescens SBW25	631	172	8e-42	0.63	0.64	3
CO000893	1659	Q6VAF7.1	Tubulin beta-5 chain	Gossypium hirsutum	445	659	0	0.95	0.95	1
CO000894	879	XP_002278759.1	PREDICTED: hypothetical protein	Vitis vinifera	180	194	7e-48	0.97	0.98	1
CO000895	831	ABS52574.1	nodulin family protein	Gossypium hirsutum	385	405	e-111	0.8	0.88	3
CO000897	843	XP_002324304.1	predicted protein	Populus trichocarpa	220	379	e-103	0.85	0.91	1
CO000898	1419	XP_002321468.1	predicted protein	Populus trichocarpa	370	67.4	4e-09	0.36	0.54	1
CO000899	912	ABK93974.1	unknown	Populus trichocarpa	217	298	6e-79	0.73	0.85	3
CO000900	1488	AAY85180.1	pectate lyase	Gossypium hirsutum	411	172	3e-85	0.98	0.98	3
CO000901	850	CAO38957.1	unnamed protein product	Vitis vinifera	220	193	2e-47	0.47	0.61	1
CO000902	654	XP_002276521.1	PREDICTED: hypothetical protein	Vitis vinifera	137	239	1e-61	0.96	0.99	1
CO000903	738	XP_002280849.1	PREDICTED: hypothetical protein	Vitis vinifera	119	204	7e-51	0.81	0.88	2
CO000904	1004	EEF37184.1	conserved hypothetical protein	Ricinus communis	216	203	2e-50	0.53	0.64	-3
CO000905	133	YP_002869820.1	putativeABC transport system, substrate-binding protein	Pseudomonas fluorescens SBW25	343	84.7	3e-15	1	1	-1
CO000906	859	XP_002322819.1	predicted protein	Populus trichocarpa	475	306	1e-81	0.59	0.74	3
CO000907	311	YP_002874314.1	short chain dehydrogenase	Pseudomonas fluorescens SBW25	252	134	2e-30	0.68	0.73	1
CO000908	819	XP_002272180.1	PREDICTED: hypothetical protein	Vitis vinifera	277	313	2e-83	0.79	0.89	1
CO000909	424	YP_346521.1	chemotaxis sensory transducer	Pseudomonas fluorescens Pf0-1	676	197	4e-49	0.79	0.81	-1
CO000910	1463	EEF30430.1	conserved hypothetical protein	Ricinus communis	393	337	1e-90	0.49	0.61	3
CO000911	1163	XP_002274829.1	PREDICTED: hypothetical protein	Vitis vinifera	244	303	2e-80	0.66	0.74	3
CO000912	858	EEF45248.1	40S ribosomal protein S3a, putative	Ricinus communis	260	433	e-120	0.91	0.95	3
CO000913	813	AAK50778.4	bacterial-induced lipoxygenase	Gossypium hirsutum	865	532	e-149	0.97	0.98	1
CO000914	1024	XP_002313911.1	predicted protein	Populus trichocarpa	317	228	1e-57	0.43	0.54	3
CO000915	543	YP_002875472.1	orotate phosphoribosyltransferase	Pseudomonas fluorescens SBW25	214	283	5e-75	0.92	0.92	-3
CO000916	865	XP_002306954.1	predicted protein	Populus trichocarpa	423	318	6e-85	0.6	0.71	2
CO000917	836	XP_002327673.1	histone H1	Populus trichocarpa	202	139	3e-31	0.92	0.97	2
CO000918	1243	ACJ11251.1	Ted2	Gossypium hirsutum	324	638	0	0.99	0.99	1
CO000919	320	YP_234610.1	single-strand DNA-binding protein	Pseudomonas syringae pv.syringae B728a	154	144	4e-33	0.69	0.81	1
CO000920	997	XP_002268626.1	PREDICTED: hypothetical protein	Vitis vinifera	768	538	e-151	0.78	0.87	3
CO000921	845	EEF36940.1	Early nodulin, putative	Ricinus communis	128	124	1e-26	0.54	0.63	2
CO000923	1213	EEF48596.1	transcription factor, putative	Ricinus communis	424	308	1e-81	0.48	0.58	1
CO000924	916	ABX10441.1	3-ketoacyl-CoA synthase 6	Gossypium hirsutum	467	297	5e-97	0.97	0.99	-3
CO000925	638	XP_002297648.1	predicted protein	Populus trichocarpa	195	251	3e-65	0.7	0.86	1
CO000926	1129	ACJ85568.1	unknown	Medicago truncatula	492	288	7e-76	0.9	0.96	2
CO000927	754	XP_002284404.1	PREDICTED: hypothetical protein	Vitis vinifera	863	274	7e-72	0.8	0.93	1
CO000928	1123	EEF50903.1	B2 protein, putative	Ricinus communis	304	471	e-131	0.76	0.81	1
CO000929	850	EEF30568.1	protein binding protein, putative	Ricinus communis	475	304	8e-81	0.96	1	3
CO000930	727	XP_002322210.1	predicted protein	Populus trichocarpa	230	238	4e-61	0.85	0.87	1
CO000931	949	XP_002285124.1	PREDICTED: hypothetical protein	Vitis vinifera	357	290	1e-76	0.57	0.64	1
CO000932	382	XP_002275118.1	PREDICTED: similar to Callose synthase 10	Vitis vinifera	1672	146	6e-34	0.89	0.94	2
CO000933	683	ABA01325.1	VDRG6	Gossypium hirsutum	157	285	3e-75	0.91	0.91	3
CO000934	928	EEF43493.1	60S ribosomal protein L9, putative	Ricinus communis	194	356	2e-96	0.9	0.96	2
CO000935	709	EEF33737.1	60S ribosomal protein L24, putative	Ricinus communis	186	219	2e-55	0.92	0.95	2
CO000936	174	YP_001771509.1	glycerophosphoryl diester phosphodiesterase	Methylobacterium sp.4-46	451	77.8	3e-13	0.75	0.86	-3
CO000937	703	AAQ08194.1	eukaryotic translation initiation factor 5A isoform IV	Heveabrasiliensis	160	317	5e-85	0.96	0.98	3
CO000938	781	XP_002301485.1	predicted protein	Populus trichocarpa	187	329	2e-88	0.89	0.91	2
CO000939	1537	ABL86673.1	GA20ox1	Gossypium barbadense	368	668	0	0.99	0.99	3
CO000940	517	P35100.1	ATP-dependent Clp protease ATP-binding subunit clpChomolog, chloroplastic	Pisum sativum	922	82.8	1e-14	0.66	0.73	2
CO000941	893	XP_002285421.1	PREDICTED: hypothetical protein	Vitis vinifera	153	311	7e-83	1	1	1
CO000942	1528	AAP73457.1	actin	Gossypium hirsutum	377	758	0	1	1	1
CO000943	975	XP_002268417.1	PREDICTED: hypothetical protein	Vitis vinifera	551	251	1e-64	0.54	0.67	3
CO000944	1018	XP_002272841.1	PREDICTED: hypothetical protein	Vitis vinifera	386	477	e-133	0.74	0.85	1
CO000945	1410	EEF40144.1	protein kinase, putative	Ricinus communis	466	715	0	0.78	0.86	2
CO000946	1049	XP_002317618.1	predicted protein	Populus trichocarpa	418	170	2e-40	0.73	0.8	3
CO000947	1032	XP_002316590.1	predicted protein	Populus trichocarpa	217	184	2e-44	0.44	0.55	1
CO000948	1368	EEF31690.1	mitochondrial dicarboxylate carrier protein, putative	Ricinuscommunis	319	462	e-128	0.75	0.81	1
CO000949	1185	ABK93338.1	unknown	Populus trichocarpa	270	394	e-107	0.72	0.8	1
CO000950	836	EEF31427.1	multidrug resistance pump, putative	Ricinus communis	488	229	2e-58	0.71	0.8	2
CO000951	799	ACJ83789.1	unknown	Medicago truncatula	179	243	2e-62	0.67	0.81	3
CO000952	875	XP_002332129.1	predicted protein	Populus trichocarpa	200	367	e-100	0.92	0.96	1
CO000953	947	XP_002278867.1	PREDICTED: hypothetical protein	Vitis vinifera	216	375	e-102	0.91	0.96	3
CO000954	824	NP_001078516.1	histone H3.2	Arabidopsis thaliana	164	268	4e-70	0.99	1	1
CO000955	690	XP_002274570.1	PREDICTED: hypothetical protein	Vitis vinifera	149	167	6e-40	0.8	0.82	2
CO000956	563	EEF39775.1	Protein C6orf115, putative	Ricinus communis	96	150	8e-35	0.82	0.93	2
CO000957	1664	ABO47738.1	alpha-tubulin	Gossypium hirsutum	449	783	0	0.89	0.89	1
CO000959	714	EEF33338.1	glycerophosphoryl diester phosphodiesterase, putative	Ricinuscommunis	768	188	5e-46	0.63	0.77	1
CO000960	901	NP_742865.1	ECF subfamily RNA polymerase sigma factor	Pseudomonas putidaKT2440	171	214	7e-54	0.64	0.73	2
CO000961	186	YP_257287.1	ABC transporter, permease protein	Pseudomonas fluorescens Pf-5	288	79	2e-13	0.7	0.72	-1
CO000962	827	P46299.1	40S ribosomal protein S4	Gossypium hirsutum	262	455	e-126	0.91	0.91	2
CO000963	1109	AAN15182.1	MADS box protein GHMADS-1	Gossypium hirsutum	236	465	e-129	0.99	0.99	3
CO000964	1312	XP_002283799.1	PREDICTED: hypothetical protein	Vitis vinifera	279	511	e-143	0.94	0.97	1
CO000965	841	EEF47974.1	ankyrin repeat domain protein, putative	Ricinus communis	345	326	2e-87	0.73	0.81	2
CO000966	901	YP_263198.1	L-asparaginase I	Pseudomonas fluorescens Pf-5	333	145	4e-33	0.73	0.8	-2
CO000967	1311	NP_187245.2	unknown protein	Arabidopsis thaliana	422	375	e-146	0.79	0.87	1
CO000968	929	XP_002279950.1	PREDICTED: hypothetical protein	Vitis vinifera	234	422	e-116	0.93	0.95	1
CO000969	614	ABZ01817.1	cinnamyl alcohol dehydrogenase	Gossypium hirsutum	357	307	5e-82	0.8	0.8	1
CO000970	230	ZP_02883386.1	small multidrug resistance protein	Burkholderia graminis C4D1M	103	58.2	3e-07	0.65	0.7	-2
CO000971	986	EEF48440.1	Glycerol-3-phosphate acyltransferase, putative	Ricinus communis	543	345	3e-93	0.63	0.77	2
CO000972	770	NP_522324.1	hypothetical protein RS01945	Ralstonia solanacearum GMI1000	1313	374	e-102	0.67	0.85	3
CO000973	757	XP_002316998.1	predicted protein	Populus trichocarpa	403	263	1e-68	0.77	0.92	1
CO000974	817	XP_002329697.1	predicted protein	Populus trichocarpa	205	325	4e-87	0.9	0.91	1
CO000975	791	ABK94851.1	unknown	Populus trichocarpa	649	226	2e-57	0.63	0.77	2
CO000976	609	XP_002308823.1	predicted protein	Populus trichocarpa	135	253	1e-65	0.9	0.94	2
CO000977	469	EEF46470.1	60S ribosomal protein L37, putative	Ricinus communis	96	117	3e-25	0.91	0.96	-2
CO000978	534	XP_002299286.1	predicted protein	Populus trichocarpa	328	92.8	1e-17	0.85	0.95	-2
CO000979	199	ACN87275.1	short chain dehydrogenase/reductase	Nandina domestica	314	60.5	6e-08	0.7	0.75	1
CO000980	903	ABN12320.1	benzoquinone reductase	Gossypium hirsutum	203	385	e-105	0.94	0.94	3
CO000981	1479	EEF43876.1	conserved hypothetical protein	Ricinus communis	433	605	e-171	0.71	0.81	3
CO000982	1169	ACQ91203.1	calreticulin	Carica papaya	422	552	e-155	0.87	0.9	1
CO000983	861	XP_002321558.1	predicted protein	Populus trichocarpa	1218	427	e-118	0.75	0.8	1
CO000984	747	AAM78185.1	putative SAH7 protein	Gossypium herbaceum	119	245	3e-63	1	1	1
CO000985	1116	XP_002331178.1	predicted protein	Populus trichocarpa	508	615	e-174	0.86	0.94	1
CO000986	404	EED42913.1	transcriptional regulator, GntR family	Enterocytozoon bieneusiH348	171	135	2e-30	0.94	0.97	-3
CO000988	941	EEF45778.1	conserved hypothetical protein	Ricinus communis	272	275	5e-72	0.59	0.69	3
CO000989	786	P46299.1	40S ribosomal protein S4	Gossypium hirsutum	262	444	e-123	0.91	0.92	3
CO000990	1025	XP_002283681.1	PREDICTED: hypothetical protein	Vitis vinifera	629	298	5e-79	0.7	0.82	3
CO000991	867	ABY65001.1	14-3-3b protein	Gossypium hirsutum	268	435	e-120	0.92	0.95	2
CO000992	693	P46293.1	40S ribosomal protein S16	Gossypium hirsutum	145	281	4e-74	0.95	0.97	3
CO000993	516	XP_002318827.1	predicted protein	Populus trichocarpa	215	174	4e-42	0.73	0.82	2
CO000994	1132	ABL86684.1	CLT2	Gossypium barbadense	264	434	e-119	0.99	1	2
CO000995	640	AAB37767.1	cellulose synthase	Gossypium hirsutum	685	315	3e-84	0.92	0.92	1
CO000996	581	XP_002265517.1	PREDICTED: similar to CPuORF25 (Conserved peptide upstream openreading frame 25)	Vitis vinifera	41	70.5	9e-11	0.73	0.8	3
CO000998	753	XP_002262924.1	PREDICTED: hypothetical protein	Vitis vinifera	216	184	1e-44	0.65	0.75	3
CO000999	865	EEF45248.1	40S ribosomal protein S3a, putative	Ricinus communis	260	435	e-120	0.93	0.96	3
CO001000	1797	XP_002284346.1	PREDICTED: hypothetical protein	Vitis vinifera	480	926	0	0.94	0.97	1
CO001001	733	ABW89467.1	low molecular weight heat shock protein	Gossypium hirsutum	158	255	3e-66	0.81	0.83	2
CO001002	467	XP_002325629.1	predicted protein	Populus trichocarpa	72	137	5e-31	0.87	0.94	1
CO001003	1224	EEF43876.1	conserved hypothetical protein	Ricinus communis	433	497	e-138	0.7	0.82	2
CO001004	872	XP_002270683.1	PREDICTED: hypothetical protein	Vitis vinifera	286	303	1e-80	0.7	0.78	3
CO001005	1059	AAB52954.1	ascorbate peroxidase	Gossypium hirsutum	288	501	e-142	0.94	0.94	3
CO001009	680	EEF33515.1	conserved hypothetical protein	Ricinus communis	402	298	3e-79	0.73	0.85	2
CO001010	1131	EEF41394.1	NADH-ubiquinone oxidoreductase 24 kD subunit, putative	Ricinuscommunis	255	435	e-120	0.91	0.96	2
CO001011	785	YP_002870128.1	sodium/proline symporter (proline permease)	Pseudomonas fluorescens SBW25	494	381	e-104	0.93	0.93	-2
CO001012	826	EEF49641.1	conserved hypothetical protein	Ricinus communis	419	212	3e-53	0.74	0.84	2
CO001013	639	EEF36388.1	Proteasome maturation protein, putative	Ricinus communis	142	222	2e-56	0.76	0.91	1
CO001014	834	CAO43539.1	unnamed protein product	Vitis vinifera	215	361	4e-98	0.81	0.87	1
CO001015	836	AAQ63461.1	calmodulin 4	Daucus carota	150	298	6e-79	1	1	3
CO001016	716	XP_002276842.1	PREDICTED: hypothetical protein	Vitis vinifera	320	382	e-104	0.96	0.99	3
CO001017	567	YP_001268721.1	siphovirus Gp157 family protein	Pseudomonas putida F1	187	90.9	6e-17	0.61	0.7	1
CO001018	1278	ABY67263.1	homeodomain protein HOX2	Gossypium arboreum	737	735	0	0.89	0.91	3
CO001019	196	YP_002870695.1	L-serine dehydratase 1	Pseudomonas fluorescens SBW25	458	126	6e-28	0.98	0.98	2
CO001020	1698	P17598.2	Catalase isozyme 1	Gossypium hirsutum	492	1035	0	0.98	0.99	1
CO001021	653	XP_002310793.1	predicted protein	Populus trichocarpa	645	310	9e-83	0.84	0.92	3
CO001022	927	EEF52923.1	CDK, putative	Ricinus communis	313	546	e-153	0.92	0.96	2
CO001023	969	XP_002274501.1	PREDICTED: hypothetical protein	Vitis vinifera	285	178	6e-43	0.38	0.5	2
CO001024	742	XP_002266527.1	PREDICTED: hypothetical protein	Vitis vinifera	516	377	e-103	0.82	0.9	3
CO001026	947	AAT08648.1	ADP-ribosylation factor	Hyacinthus orientalis	199	365	3e-99	1	1	3
CO001027	1651	ACD56660.1	cellulose synthase	Gossypium arboreum	973	892	0	0.92	0.92	3
CO001028	1024	XP_002302634.1	predicted protein	Populus trichocarpa	490	338	4e-91	0.58	0.73	2
CO001029	1094	XP_002298643.1	predicted protein	Populus trichocarpa	389	671	0	0.95	0.98	2
CO001030	861	XP_002280723.1	PREDICTED: hypothetical protein	Vitis vinifera	321	365	3e-99	0.81	0.86	3
CO001031	667	XP_002331635.1	methylenetetrahydrofolate reductase	Populus trichocarpa	606	335	2e-90	0.81	0.91	1
CO001032	714	XP_002265347.1	PREDICTED: hypothetical protein	Vitis vinifera	122	239	2e-61	0.98	0.98	1
CO001033	837	XP_002328114.1	predicted protein	Populus trichocarpa	277	424	e-117	0.78	0.88	2
CO001035	924	XP_002304887.1	predicted protein	Populus trichocarpa	308	143	2e-32	0.81	0.86	2
CO001036	1344	XP_002280247.1	PREDICTED: hypothetical protein	Vitis vinifera	410	674	0	0.8	0.9	2
CO001037	1337	XP_002310485.1	predicted protein	Populus trichocarpa	417	737	0	0.86	0.9	1
CO001038	904	ACF74351.1	putative metal ion-binding protein	Arachis hypogaea	232	105	8e-21	0.68	0.75	1
CO001039	505	EEF52738.1	conserved hypothetical protein	Ricinus communis	111	151	3e-35	0.71	0.8	1
CO001040	488	EEF38802.1	hypothetical protein RCOM_1409730	Ricinus communis	271	93.2	8e-18	0.85	0.91	2
CO001041	843	XP_002300063.1	predicted protein	Populus trichocarpa	135	223	2e-56	0.81	0.85	1
CO001042	745	XP_002308639.1	predicted protein	Populus trichocarpa	174	223	2e-56	0.83	0.88	2
CO001043	1542	XP_002304637.1	predicted protein	Populus trichocarpa	413	753	0	0.88	0.93	2
CO001044	833	XP_002312893.1	predicted protein	Populus trichocarpa	537	161	8e-38	0.77	0.81	-1
CO001045	790	XP_002328525.1	predicted protein	Populus trichocarpa	761	226	2e-57	0.83	0.91	1
CO001046	913	EEF30630.1	conserved hypothetical protein	Ricinus communis	168	188	6e-46	0.73	0.81	3
CO001047	1602	XP_002332006.1	predicted protein	Populus trichocarpa	415	171	2e-40	0.35	0.42	3
CO001048	869	XP_002279692.1	PREDICTED: hypothetical protein	Vitis vinifera	249	160	1e-37	0.43	0.49	3
CO001049	763	XP_002284139.1	PREDICTED: hypothetical protein	Vitis vinifera	258	339	1e-91	0.78	0.81	2
CO001050	1087	NP_199028.1	mitochondrial substrate carrier family protein	Arabidopsisthaliana	412	266	2e-76	0.58	0.67	2
CO001051	806	EEF36956.1	conserved hypothetical protein	Ricinus communis	309	188	4e-46	0.74	0.9	2
CO001052	552	XP_002285164.1	PREDICTED: hypothetical protein	Vitis vinifera	147	159	9e-38	0.68	0.82	3
CO001053	985	EEF41441.1	conserved hypothetical protein	Ricinus communis	500	377	e-103	0.71	0.8	1
CO001054	1161	EEF48414.1	conserved hypothetical protein	Ricinus communis	327	327	1e-87	0.68	0.78	1
CO001055	1096	CAC44257.1	FtsZ-like protein	Nicotiana tabacum	468	392	e-107	0.91	0.94	1
CO001057	723	XP_002308303.1	predicted protein	Populus trichocarpa	409	234	6e-60	0.81	0.9	2
CO001058	714	XP_002317073.1	predicted protein	Populus trichocarpa	290	297	7e-79	0.92	0.98	1
CO001059	736	AAQ63461.1	calmodulin 4	Daucus carota	150	298	4e-79	1	1	2
CO001060	719	XP_002262921.1	PREDICTED: hypothetical protein	Vitis vinifera	386	435	e-120	0.92	0.96	2
CO001061	783	EEF41853.1	conserved hypothetical protein	Ricinus communis	166	244	5e-63	0.69	0.79	2
CO001062	844	EEF48926.1	polyadenylate-binding protein, putative	Ricinus communis	199	254	5e-66	0.81	0.91	3
CO001063	666	NP_197398.1	AWPM-19-like membrane family protein	Arabidopsis thaliana	171	165	4e-39	0.59	0.65	-1
CO001064	670	AAS13367.1	cyclin-dependent kinases regulatory subunit	Glycine max	88	162	3e-38	0.87	0.87	2
CO001065	831	ABO69575.1	betaine-aldehyde dehydrogenase	Jatropha curcas	503	393	e-107	0.72	0.8	1
CO001066	1496	XP_002298545.1	predicted protein	Populus trichocarpa	356	442	e-122	0.59	0.71	1
CO001067	714	XP_002279098.1	PREDICTED: hypothetical protein isoform 3	Vitis vinifera	249	273	1e-71	0.81	0.88	3
CO001068	849	ABK93213.1	unknown	Populus trichocarpa	178	362	2e-98	0.97	0.99	1
CO001071	1186	XP_002315419.1	predicted protein	Populus trichocarpa	308	510	e-142	0.81	0.89	1
CO001072	632	AAX44033.1	(+)-delta-cadinene synthase	Gossypium hirsutum	554	315	2e-84	1	1	2
CO001073	419	XP_002298768.1	predicted protein	Populus trichocarpa	56	124	2e-27	0.94	0.94	1
CO001074	763	YP_001478696.1	major facilitator transporter	Serratia proteamaculans 568	453	317	7e-85	0.64	0.81	-1
CO001075	609	YP_002873984.1	putative flagellar hook-associated protein	Pseudomonas fluorescensSBW25	682	277	4e-73	0.72	0.8	3
CO001076	510	ACJ84132.1	unknown	Medicago truncatula	86	159	1e-37	0.88	0.88	3
CO001077	505	YP_002869733.1	tryptophan synthase beta chain	Pseudomonas fluorescens SBW25	408	332	6e-90	0.98	0.98	-1
CO001078	838	XP_002308015.1	predicted protein	Populus trichocarpa	437	498	e-139	0.93	0.98	2
CO001079	875	CAN78656.1	hypothetical protein	Vitis vinifera	228	324	8e-87	0.7	0.81	3
CO001080	957	EEF34971.1	Protein SEY1, putative	Ricinus communis	813	496	e-138	0.78	0.87	1
CO001081	1094	EEF46387.1	malic enzyme, putative	Ricinus communis	641	622	e-176	0.84	0.9	2
CO001082	860	YP_002869726.1	hypothetical protein PFLU0029	Pseudomonas fluorescens SBW25	115	210	2e-52	0.84	0.93	1
CO001083	860	ACA06103.1	vimentin variant 3	Homo sapiens	431	455	e-126	0.86	0.87	2
CO001084	1054	AAO59488.1	ser-thr protein kinase	Gossypium hirsutum	328	465	e-129	0.96	0.97	1
CO001085	807	XP_002322829.1	predicted protein	Populus trichocarpa	433	265	5e-69	0.83	0.88	3
CO001086	1177	XP_002273794.1	PREDICTED: hypothetical protein	Vitis vinifera	209	334	9e-90	0.78	0.82	1
CO001087	1122	XP_002271699.1	PREDICTED: hypothetical protein	Vitis vinifera	984	459	e-127	0.72	0.81	1
CO001089	811	XP_002266244.1	PREDICTED: hypothetical protein	Vitis vinifera	722	291	1e-87	0.61	0.75	3
CO001090	819	AAQ63461.1	calmodulin 4	Daucus carota	150	285	3e-75	1	1	3
CO001091	408	XP_002301854.1	predicted protein	Populus trichocarpa	255	119	1e-25	0.64	0.81	1
CO001092	878	EEF45447.1	prolyl 4-hydroxylase alpha subunit, putative	Ricinus communis	297	438	e-121	0.82	0.91	2
CO001093	699	EEF32541.1	60S ribosomal protein L14, putative	Ricinus communis	133	239	1e-61	0.9	0.93	2
CO001094	1571	EEF51036.1	Triose phosphate/phosphate translocator, chloroplast precursor,putative	Ricinus communis	360	565	e-159	0.81	0.87	1
CO001097	748	EEF35409.1	glycine-rich RNA-binding protein, putative	Ricinus communis	166	152	4e-35	0.82	0.96	2
CO001098	780	XP_002313984.1	predicted protein	Populus trichocarpa	218	295	2e-78	0.8	0.88	2
CO001099	827	EEF49907.1	60S ribosomal protein L18, putative	Ricinus communis	403	354	5e-96	0.91	0.94	3
CO001100	822	EEF52288.1	sigma factor sigb regulation protein rsbq, putative	Ricinuscommunis	266	457	e-127	0.85	0.9	2
CO001101	1751	EEF52903.1	sugar transporter, putative	Ricinus communis	739	868	0	0.79	0.86	2
CO001102	696	EEF31095.1	Prefoldin subunit, putative	Ricinus communis	126	191	4e-47	0.78	0.81	1
CO001103	806	ABO47735.1	alpha-tubulin	Gossypium hirsutum	449	397	e-109	0.92	0.92	1
CO001104	481	XP_002285566.1	PREDICTED: hypothetical protein	Vitis vinifera	83	59.7	9e-08	0.66	0.8	3
CO001105	1145	XP_002298129.1	2-oxoglutarate-dependent dioxygenase	Populus trichocarpa	314	318	7e-85	0.53	0.71	2
CO001106	778	CAC86004.1	aspartic proteinase	Theobroma cacao	514	373	e-101	0.81	0.9	1
CO001107	682	YP_347475.1	1-acyl-sn-glycerol-3-phosphate acyltransferase	Pseudomonasfluorescens Pf0-1	244	324	4e-87	0.84	0.91	2
CO001108	686	XP_002299302.1	predicted protein	Populus trichocarpa	91	177	6e-43	0.92	0.93	3
CO001110	915	XP_002285591.1	PREDICTED: hypothetical protein	Vitis vinifera	718	186	3e-45	0.94	1	3
CO001111	819	EEF47449.1	conserved hypothetical protein	Ricinus communis	134	144	8e-33	0.62	0.7	3
CO001112	1021	XP_002320474.1	predicted protein	Populus trichocarpa	174	118	1e-24	0.75	0.9	1
CO001113	1042	EEF48147.1	Protein-tyrosine phosphatase mitochondrial 1, mitochondrialprecursor, putative	Ricinus communis	284	411	e-113	0.73	0.82	1
CO001114	1251	AAP73455.1	actin	Gossypium hirsutum	378	400	e-109	0.87	0.88	1
CO001115	754	XP_002268061.1	PREDICTED: hypothetical protein	Vitis vinifera	130	235	4e-60	0.91	0.96	3
CO001116	1174	EEF37786.1	nucleic acid binding protein, putative	Ricinus communis	313	169	5e-40	0.75	0.81	2
CO001117	915	EEF31739.1	RING-H2 finger protein ATL4M, putative	Ricinus communis	235	387	e-106	0.81	0.86	1
CO001118	688	EEF33123.1	translocon-associated protein, alpha subunit, putative	Ricinuscommunis	260	245	2e-63	0.68	0.79	3
CO001119	1484	XP_002320625.1	predicted protein	Populus trichocarpa	421	716	0	0.88	0.95	1
CO001120	1358	EEF34407.1	proteasome subunit beta type 6,9, putative	Ricinus communis	231	423	e-116	0.89	0.95	3
CO001121	803	EEF41398.1	ATP binding protein, putative	Ricinus communis	312	333	1e-89	0.71	0.81	1
CO001122	916	AAY89231.1	hexose transporter 1	Juglans regia	521	377	e-103	0.75	0.81	3
CO001123	863	XP_002281000.1	PREDICTED: hypothetical protein	Vitis vinifera	479	419	e-115	0.8	0.85	2
CO001124	794	XP_002326321.1	predicted protein	Populus trichocarpa	520	240	1e-61	0.56	0.69	1
CO001125	731	ACJ86187.1	unknown	Medicago truncatula	86	155	3e-36	0.86	0.87	2
CO001126	770	EEF42935.1	Phenylalanine ammonia-lyase, putative	Ricinus communis	714	401	e-110	0.83	0.91	1
CO001127	870	XP_002271887.1	PREDICTED: hypothetical protein	Vitis vinifera	460	431	e-119	0.85	0.92	2
CO001128	870	YP_002874508.1	putative lipoprotein	Pseudomonas fluorescens SBW25	290	272	3e-71	0.72	0.83	-3
CO001129	830	CAN64246.1	hypothetical protein	Vitis vinifera	275	271	4e-71	0.66	0.79	2
CO001130	1135	EEF36692.1	5-methyltetrahydropteroyltriglutamate--homocysteinemethyltransferase, putative	Ricinus communis	765	518	e-145	0.96	0.96	2
CO001131	991	EEF38106.1	DAG protein, chloroplast precursor, putative	Ricinus communis	389	126	4e-27	0.61	0.64	1
CO001132	605	EEF38408.1	cytochrome P450, putative	Ricinus communis	516	270	5e-71	0.81	0.89	3
CO001133	749	XP_002265759.1	PREDICTED: hypothetical protein	Vitis vinifera	358	258	5e-67	0.81	0.91	2
CO001134	818	EEF44730.1	conserved hypothetical protein	Ricinus communis	126	148	5e-34	0.61	0.78	3
CO001135	846	EEF28417.1	protein with unknown function	Ricinus communis	327	407	e-112	0.76	0.86	2
CO001136	788	XP_002304871.1	predicted protein	Populus trichocarpa	190	185	4e-45	0.59	0.73	1
CO001137	1940	ACM78591.1	granule-bound starch synthase	Nelumbo nucifera	615	426	0	0.82	0.9	2
CO001138	311	YP_002799770.1	Bacterial regulatory protein, LacI family	Azotobacter vinelandiiDJ	340	131	3e-29	0.62	0.71	-2
CO001139	1228	ABY65003.1	14-3-3d protein	Gossypium hirsutum	261	491	e-137	0.95	0.98	2
CO001140	1307	XP_002284543.1	PREDICTED: hypothetical protein	Vitis vinifera	862	502	e-140	0.82	0.89	2
CO001141	741	AAY68034.1	3-hydroxy-methylglutaryl coenzyme A reductase	Tilia miqueliana	585	360	6e-98	0.8	0.89	2
CO001142	784	CAO40166.1	unnamed protein product	Vitis vinifera	185	365	3e-99	0.98	0.98	2
CO001143	627	ACJ85525.1	unknown	Medicago truncatula	363	175	3e-42	0.77	0.86	3
CO001144	888	XP_002327273.1	predicted protein	Populus trichocarpa	204	370	e-100	0.87	0.88	2
CO001146	1355	EEF47704.1	conserved hypothetical protein	Ricinus communis	510	464	e-129	0.82	0.87	3
CO001147	749	XP_002285171.1	PREDICTED: hypothetical protein	Vitis vinifera	413	73.2	2e-11	0.53	0.66	3
CO001148	919	XP_002282632.1	PREDICTED: hypothetical protein	Vitis vinifera	261	462	e-128	0.91	0.96	2
CO001149	1228	EEF33624.1	carboxylic ester hydrolase, putative	Ricinus communis	356	441	e-122	0.62	0.76	1
CO001150	870	EEF37091.1	Glucan endo-1,3-beta-glucosidase precursor, putative	Ricinuscommunis	431	215	4e-54	0.57	0.72	1
CO001152	2263	AAZ15705.1	endo-alpha-1,4-glucanase	Gossypium hirsutum	627	669	0	0.99	1	2
CO001153	583	XP_002320108.1	predicted protein	Populus trichocarpa	91	154	6e-36	0.97	0.97	3
CO001154	772	EEF36182.1	cytochrome P450, putative	Ricinus communis	511	426	e-118	0.86	0.94	1
CO001155	1136	AAD28641.1	sucrose synthase	Gossypium hirsutum	806	582	e-164	0.92	0.96	1
CO001156	730	XP_002307750.1	predicted protein	Populus trichocarpa	288	253	1e-68	0.67	0.77	2
CO001157	1355	EEF45384.1	vacuole membrane protein, putative	Ricinus communis	427	383	e-104	0.72	0.81	1
CO001158	651	XP_002268048.1	PREDICTED: hypothetical protein	Vitis vinifera	1034	244	4e-63	0.61	0.68	2
CO001159	1013	XP_002310303.1	predicted protein	Populus trichocarpa	260	487	e-136	0.96	0.98	2
CO001160	777	AAQ17460.1	transaldolase	Gossypium hirsutum	396	327	7e-88	0.82	0.86	3
CO001161	885	YP_276675.1	filamentous hemagglutinin	Pseudomonas syringae pv. phaseolicola1448A	1848	355	4e-96	0.62	0.73	-2
CO001163	918	AAB71613.1	UDP-glucose pyrophosphorylase	Solanum tuberosum	477	453	e-126	0.79	0.85	2
CO001164	840	XP_002278549.1	PREDICTED: hypothetical protein	Vitis vinifera	829	354	7e-96	0.78	0.88	1
CO001165	801	YP_002873986.1	flagellar P-ring protein precuror	Pseudomonas fluorescens SBW25	368	312	3e-83	0.97	1	3
CO001167	890	EEF28727.1	glutaredoxin-1, grx1, putative	Ricinus communis	135	157	2e-36	0.78	0.87	2
CO001168	1602	ABS01352.1	methionine synthase	Carica papaya	765	879	0	0.84	0.87	1
CO001169	859	XP_002317364.1	predicted protein	Populus trichocarpa	777	321	5e-86	0.8	0.85	2
CO001170	668	ABK92701.1	unknown	Populus trichocarpa	122	174	5e-42	0.71	0.81	1
CO001171	1477	XP_002306708.1	predicted protein	Populus trichocarpa	389	729	0	0.89	0.95	1
CO001172	1085	XP_002298405.1	predicted protein	Populus trichocarpa	472	530	e-149	0.7	0.84	3
CO001173	457	XP_002314967.1	predicted protein	Populus trichocarpa	567	65.5	2e-09	0.7	0.9	-2
CO001174	1154	XP_002283371.1	PREDICTED: hypothetical protein	Vitis vinifera	502	626	e-177	0.94	0.98	1
CO001176	673	XP_002276256.1	PREDICTED: hypothetical protein	Vitis vinifera	170	283	7e-75	0.8	0.88	2
CO001177	1367	XP_002319230.1	predicted protein	Populus trichocarpa	536	672	0	0.71	0.82	2
CO001178	905	EEF44495.1	acetylglucosaminyltransferase, putative	Ricinus communis	439	222	4e-56	0.67	0.76	3
CO001179	870	XP_002299759.1	predicted protein	Populus trichocarpa	203	329	2e-88	0.86	0.88	2
CO001180	863	EEF30366.1	beta-fructofuranosidase, putative	Ricinus communis	663	350	1e-94	0.83	0.92	3
CO001181	814	EEF48133.1	Charged multivesicular body protein 4b, putative	Ricinus communis	218	224	6e-57	0.62	0.64	1
CO001182	842	XP_002323754.1	predicted protein	Populus trichocarpa	199	280	2e-73	0.72	0.78	2
CO001183	1232	EEF41128.1	protein phosphatase 2c, putative	Ricinus communis	397	484	e-135	0.81	0.87	1
CO001184	452	YP_002871277.1	putative peptide ABC transport system, substrate-binding protein	Pseudomonas fluorescens SBW25	504	292	9e-78	0.94	0.96	1
CO001185	949	EEF51796.1	AMP-activated protein kinase, gamma regulatory subunit, putative	Ricinus communis	459	405	e-111	0.77	0.84	1
CO001186	388	YP_002874667.1	putative glycosyltransferase	Pseudomonas fluorescens SBW25	400	244	2e-63	0.92	0.98	1
CO001188	665	ABY41242.1	homeodomain protein HOX1	Gossypium arboreum	753	105	3e-21	1	1	1
CO001189	708	EEF33737.1	60S ribosomal protein L24, putative	Ricinus communis	186	196	2e-48	0.85	0.88	3
CO001191	819	YP_002873966.1	putative response regulator	Pseudomonas fluorescens SBW25	559	442	e-122	0.81	0.88	-2
CO001192	1175	AAQ54338.1	glycuronosyltransferase-like protein	Gossypium hirsutum	368	727	0	0.97	0.99	3
CO001193	507	ABK95217.1	unknown	Populus trichocarpa	86	147	5e-34	0.87	0.96	1
CO001194	1226	XP_002282021.1	PREDICTED: hypothetical protein isoform 1	Vitis vinifera	272	505	e-141	0.9	0.96	3
CO001195	934	NP_196729.1	unknown protein	Arabidopsis thaliana	207	343	1e-92	0.8	0.87	1
CO001197	662	XP_002285487.1	PREDICTED: hypothetical protein	Vitis vinifera	210	185	3e-45	0.81	0.86	2
CO001199	665	NP_175829.1	EIF4A-2; ATP-dependent helicase/ translation initiation factor	Arabidopsis thaliana	412	245	3e-63	0.96	1	3
CO001200	703	EEF40828.1	inorganic pyrophosphatase, putative	Ricinus communis	212	201	4e-50	0.95	0.98	1
CO001201	749	EEF28958.1	ATP binding protein, putative	Ricinus communis	661	198	4e-49	0.52	0.58	1
CO001202	705	XP_002297918.1	predicted protein	Populus trichocarpa	239	58.2	7e-07	0.39	0.58	1
CO001203	1144	Q9AT56.1	S-adenosylmethionine synthetase 1	Elaeagnus umbellata	393	673	0	0.93	0.96	3
CO001204	668	XP_002284224.1	PREDICTED: hypothetical protein	Vitis vinifera	246	223	1e-56	0.91	0.95	2
CO001205	774	NP_973557.1	ubiquitin fusion degradation UFD1 family protein	Arabidopsisthaliana	312	311	3e-83	0.74	0.85	1
CO001206	886	YP_347168.1	MscS mechanosensitive ion channel	Pseudomonas fluorescens Pf0-1	432	395	e-108	0.92	0.95	3
CO001207	618	XP_002312686.1	predicted protein	Populus trichocarpa	423	215	2e-54	0.85	0.86	2
CO001208	914	NP_064004.1	orf107b	Beta vulgaris subsp. vulgaris	107	190	1e-46	0.87	0.91	-3
CO001209	894	EEF35671.1	asparagine synthetase, putative	Ricinus communis	591	499	e-139	0.88	0.91	2
CO001210	1326	EEF47198.1	conserved hypothetical protein	Ricinus communis	338	526	e-147	0.7	0.81	3
CO001211	1284	EEF29809.1	multicopper oxidase, putative	Ricinus communis	593	615	0	0.89	0.94	2
CO001212	547	EEF35945.1	60S ribosomal protein L3, putative	Ricinus communis	389	275	2e-72	0.92	0.98	2
CO001213	616	XP_002393975.1	hypothetical protein MPER_06208	Moniliophthora perniciosa FA553	115	208	3e-52	0.92	0.94	1
CO001214	962	CAN71059.1	hypothetical protein	Vitis vinifera	313	73.6	3e-11	0.28	0.44	3
CO001215	809	XP_002305487.1	predicted protein	Populus trichocarpa	266	192	2e-47	0.68	0.77	1
CO001216	660	XP_002282071.1	PREDICTED: similar to ubiquitin fusion protein	Vitis vinifera	128	259	2e-67	1	1	1
CO001217	490	YP_002872646.1	putative LysR-family transcriptional regulator	Pseudomonas fluorescens SBW25	301	306	3e-82	0.97	0.98	2
CO001218	1020	EEF32421.1	gulonolactone oxidase, putative	Ricinus communis	589	320	2e-85	0.64	0.77	1
CO001219	755	EEF29881.1	40S ribosomal protein S11, putative	Ricinus communis	159	286	2e-75	0.87	0.89	1
CO001220	786	EEF40854.1	sugar transporter, putative	Ricinus communis	382	157	1e-36	0.57	0.72	1
CO001221	905	CAO46040.1	unnamed protein product	Vitis vinifera	421	480	e-134	0.83	0.87	1
CO001222	897	XP_002327795.1	predicted protein	Populus trichocarpa	192	348	4e-94	0.87	0.9	1
CO001223	694	XP_002269566.1	PREDICTED: hypothetical protein	Vitis vinifera	400	304	4e-81	0.65	0.76	1
CO001224	863	EEF38847.1	conserved hypothetical protein	Ricinus communis	172	254	1e-65	0.75	0.8	1
CO001225	1049	CAB36515.1	putative protein	Arabidopsis thaliana	770	279	5e-95	0.61	0.77	1
CO001226	1086	EEF28759.1	alcohol dehydrogenase, putative	Ricinus communis	379	671	0	0.94	0.98	1
CO001227	1137	XP_002313984.1	predicted protein	Populus trichocarpa	218	305	7e-81	0.82	0.89	3
CO001229	1162	CAO44184.1	unnamed protein product	Vitis vinifera	241	436	e-120	0.89	0.91	2
CO001230	1266	XP_002325771.1	predicted protein	Populus trichocarpa	276	365	4e-99	0.67	0.82	3
CO001231	648	YP_261328.1	TPS family activation/secretion protein	Pseudomonas fluorescensPf-5	574	252	2e-65	0.64	0.68	-3
CO001232	777	XP_002320875.1	predicted protein	Populus trichocarpa	197	307	6e-82	0.76	0.84	2
CO001233	1155	EEF32091.1	protein disulfide isomerase, putative	Ricinus communis	575	328	5e-88	0.75	0.81	3
CO001234	1117	CAA66667.1	polyubiquitin	Pinus sylvestris	761	392	e-116	0.99	0.99	2
CO001235	704	XP_002299952.1	predicted protein	Populus trichocarpa	99	195	4e-48	0.97	0.98	2
CO001236	1156	ABV27473.1	fasciclin-like arabinogalactan protein 2	Gossypium hirsutum	265	349	3e-94	0.7	0.7	3
CO001237	756	EEF46844.1	conserved hypothetical protein	Ricinus communis	144	210	1e-52	0.67	0.76	3
CO001238	1227	XP_002263692.1	PREDICTED: hypothetical protein	Vitis vinifera	252	325	5e-87	0.68	0.75	3
CO001239	1364	XP_002301829.1	predicted protein	Populus trichocarpa	446	731	0	0.95	0.96	3
CO001240	916	XP_002322853.1	predicted protein	Populus trichocarpa	176	236	3e-60	0.78	0.82	1
CO001242	644	NP_849396.1	unknown protein	Arabidopsis thaliana	57	105	3e-21	0.91	0.96	1
CO001244	445	XP_002276269.1	PREDICTED: similar to Pyrophosphate--fructose 6-phosphate1-phosphotransferase subunit alpha	Vitis vinifera	616	144	4e-33	0.91	0.97	3
CO001245	929	ABY86654.1	beta-tubulin 2	Gossypium hirsutum	446	524	e-147	0.94	0.94	2
CO001246	595	XP_002329906.1	predicted protein	Populus trichocarpa	399	232	2e-59	0.88	0.93	1
CO001247	1157	EEF48147.1	Protein-tyrosine phosphatase mitochondrial 1, mitochondrialprecursor, putative	Ricinus communis	284	424	e-116	0.76	0.84	1
CO001248	1162	ABR68794.1	aquaporin PIP1-2	Gossypium hirsutum	287	555	e-156	0.95	0.96	2
CO001249	860	ACF06473.1	light-inducible protein ATLS1	Elaeis guineensis	115	219	3e-55	0.94	0.97	3
CO001250	497	XP_001369414.1	PREDICTED: similar to Tubulin, beta 4	Monodelphis domestica	439	75.1	2e-12	0.97	1	1
CO001251	778	EEF38341.1	brg-1 associated factor, putative	Ricinus communis	134	131	8e-29	0.79	0.86	2
CO001252	909	NP_175998.1	unknown protein	Arabidopsis thaliana	398	116	3e-24	0.34	0.46	3
CO001253	478	NP_001042915.1	Os01g0328400	Oryza sativa (japonica cultivar-group)	155	154	4e-36	0.76	0.76	1
CO001254	853	EEF35935.1	rRNA-processing protein EBP2, putative	Ricinus communis	307	265	4e-69	0.67	0.77	3
CO001255	1658	AAZ05070.1	glutamate decarboxylase	Citrus sinensis	494	870	0	0.86	0.9	1
CO001256	1119	XP_002273781.1	PREDICTED: hypothetical protein isoform 3	Vitis vinifera	539	229	4e-58	0.59	0.7	3
CO001257	1134	ABO31374.1	unknown	Gossypium hirsutum	254	162	7e-51	0.59	0.72	-2
CO001259	768	EEF39662.1	glycine-rich RNA-binding protein, putative	Ricinus communis	134	165	4e-39	0.74	0.86	1
CO001260	834	EEF50163.1	eukaryotic peptide chain release factor subunit, putative	Ricinuscommunis	436	168	7e-40	0.86	0.94	3
CO001261	1285	XP_002313574.1	calcium dependent protein kinase 5	Populus trichocarpa	565	686	0	0.96	0.99	1
CO001262	1454	XP_002326252.1	predicted protein	Populus trichocarpa	434	778	0	0.88	0.94	2
CO001263	389	YP_001668460.1	methylamine utilisation MauE	Pseudomonas putida GB-1	178	54.7	3e-06	0.4	0.42	-2
CO001266	973	XP_002283671.1	PREDICTED: hypothetical protein	Vitis vinifera	254	412	e-113	0.81	0.87	3
CO001267	811	YP_257838.1	hypothetical protein PFL_0696	Pseudomonas fluorescens Pf-5	395	438	e-121	0.84	0.88	-3
CO001268	664	2206327A	T complex protein	Cucumis sativus	534	280	1e-73	0.94	0.98	1
CO001269	927	ACF04278.1	UTP-glucose 1 phosphate uridylyltransferase	Eucalyptus grandis	476	470	e-130	0.82	0.88	3
CO001270	1146	CAO49227.1	unnamed protein product	Vitis vinifera	424	479	e-133	0.8	0.89	3
CO001271	798	XP_002273286.1	PREDICTED: hypothetical protein	Vitis vinifera	196	195	5e-48	0.93	0.95	3
CO001272	796	XP_002285444.1	PREDICTED: hypothetical protein	Vitis vinifera	204	338	3e-91	0.86	0.92	1
CO001273	319	YP_002870120.1	hypothetical protein PFLU0444	Pseudomonas fluorescens SBW25	487	176	9e-43	0.82	0.86	3
CO001274	715	ABY86654.1	beta-tubulin 2	Gossypium hirsutum	446	427	e-118	0.95	0.95	3
CO001275	1157	AAP97136.1	putative spermine synthase	Lycopersicon esculentum	356	103	7e-27	0.67	0.75	1
CO001276	862	BAB62170.1	glutamate dehydrogenase	Brassica napus	411	437	e-121	0.92	0.97	1
CO001277	633	XP_002332672.1	predicted protein	Populus trichocarpa	151	110	1e-22	0.56	0.68	1
CO001278	1187	EEF29960.1	hydrolase, hydrolyzing O-glycosyl compounds, putative	Ricinuscommunis	550	332	5e-89	0.61	0.79	1
CO001279	451	XP_002311609.1	predicted protein	Populus trichocarpa	514	81.3	3e-14	0.8	0.95	1
CO001280	863	EEF44376.1	26S proteasome regulatory subunit rpn1, putative	Ricinus communis	895	486	e-135	0.96	0.99	3
CO001281	1206	EEF33451.1	glucosyltransferase, putative	Ricinus communis	483	642	0	0.8	0.9	3
CO001282	1306	XP_002271344.1	PREDICTED: hypothetical protein	Vitis vinifera	541	353	2e-95	0.78	0.86	2
CO001283	833	EEF28972.1	NADH-ubiquinone oxidoreductase 12 kDa subunit, mitochondrialprecursor, putative	Ricinus communis	106	202	4e-50	0.86	0.94	3
CO001284	1598	EEF49927.1	Eukaryotic translation initiation factor 3 subunit, putative	Ricinuscommunis	994	393	e-107	0.49	0.56	1
CO001285	1167	EEF40752.1	arsenite-resistance protein, putative	Ricinus communis	823	640	0	0.78	0.89	3
CO001286	646	XP_002316965.1	histone H2	Populus trichocarpa	133	174	6e-42	0.7	0.7	2
CO001287	795	XP_002305962.1	predicted protein	Populus trichocarpa	345	316	2e-84	0.83	0.89	-3
CO001288	934	YP_001750330.1	TonB-dependent siderophore receptor	Pseudomonas putida W619	825	220	2e-55	0.64	0.81	-2
CO001289	847	YP_259739.1	sulfate transporter, putative	Pseudomonas fluorescens Pf-5	557	252	4e-65	0.51	0.58	-1
CO001292	521	XP_002303699.1	predicted protein	Populus trichocarpa	68	71.2	4e-11	0.45	0.5	1
CO001295	613	XP_002299811.1	predicted protein	Populus trichocarpa	158	262	2e-68	0.9	0.96	3
CO001297	1033	P46299.1	40S ribosomal protein S4	Gossypium hirsutum	262	471	e-131	0.91	0.92	1
CO001298	859	AAL37896.1	polyphosphoinositide binding protein	Gossypium hirsutum	247	440	e-122	0.93	0.98	2
CO001300	932	XP_002307484.1	f-box family protein	Populus trichocarpa	293	249	4e-64	0.48	0.62	2
CO001301	1059	XP_002307558.1	predicted protein	Populus trichocarpa	247	312	3e-83	0.65	0.8	3
CO001302	1013	XP_002277100.1	PREDICTED: hypothetical protein	Vitis vinifera	232	338	4e-91	0.82	0.9	3
CO001303	838	ABY84681.1	universal stress protein 1	Gossypium arboreum	164	293	8e-78	0.91	0.95	2
CO001304	936	XP_002315029.1	predicted protein	Populus trichocarpa	223	301	5e-80	0.69	0.81	3
CO001305	1435	XP_002277267.1	PREDICTED: hypothetical protein	Vitis vinifera	496	715	0	0.7	0.82	2
CO001306	543	EEF35425.1	hypothetical protein RCOM_0530890	Ricinus communis	180	119	2e-39	0.71	0.84	3
CO001307	519	ACJ84673.1	unknown	Medicago truncatula	327	110	2e-24	0.98	0.98	2
CO001308	777	ABD65459.1	putative ribosomal protein L28	Gossypium hirsutum	150	258	3e-67	0.84	0.93	2
CO001309	1152	EEF41449.1	conserved hypothetical protein	Ricinus communis	366	479	e-133	0.75	0.82	3
CO001310	973	AAQ84317.1	fiber NTGP1-related protein	Gossypium barbadense	199	379	e-103	0.97	0.98	2
CO001311	1364	ABS52573.1	chalcone synthase	Gossypium hirsutum	389	747	0	0.96	0.96	1
CO001312	1321	XP_002265476.1	PREDICTED: hypothetical protein	Vitis vinifera	377	745	0	0.98	0.99	2
CO001313	657	XP_002276499.1	PREDICTED: hypothetical protein	Vitis vinifera	205	103	2e-20	0.52	0.66	-3
CO001314	717	XP_002277251.1	PREDICTED: similar to plastid acyl carrier protein	Vitis vinifera	139	154	7e-36	0.62	0.72	3
CO001315	452	XP_002454723.1	hypothetical protein SORBIDRAFT_04g036230	Sorghum bicolor	759	149	9e-35	0.94	0.97	2
CO001316	752	XP_002284203.1	PREDICTED: similar to UBC9 (UBIQUITIN CONJUGATING ENZYME 9);ubiquitin-protein ligase isoform 2	Vitis vinifera	148	313	1e-83	1	1	1
CO001317	858	XP_002263398.1	PREDICTED: hypothetical protein	Vitis vinifera	422	272	3e-71	0.81	0.85	3
CO001318	1340	XP_002276170.1	PREDICTED: hypothetical protein	Vitis vinifera	361	471	e-131	0.67	0.75	1
CO001319	1588	P31405.1	V-type proton ATPase catalytic subunit A	Gossypium hirsutum	623	1030	0	1	1	3
CO001320	1045	EEE57379.1	hypothetical protein OsJ_07538	Oryza sativa Japonica Group	1435	202	2e-92	0.66	0.79	3
CO001321	584	XP_002325548.1	predicted protein	Populus trichocarpa	96	157	7e-37	0.8	0.86	2
CO001322	815	XP_002278392.1	PREDICTED: hypothetical protein	Vitis vinifera	720	236	2e-60	0.68	0.82	1
CO001323	842	EEF40713.1	srpk, putative	Ricinus communis	445	337	8e-91	0.79	0.85	2
CO001324	823	XP_002283487.1	PREDICTED: hypothetical protein	Vitis vinifera	215	333	9e-90	0.87	0.93	2
CO001325	663	YP_002870689.1	hypothetical protein PFLU1029	Pseudomonas fluorescens SBW25	267	234	5e-60	0.95	0.96	-2
CO001326	1080	XP_002321296.1	predicted protein	Populus trichocarpa	394	542	e-152	0.81	0.9	1
CO001327	1011	AAM47602.1	ovule/fiber cell elongation protein Ghfe1	Gossypium hirsutum	563	609	e-172	0.99	0.99	3
CO001328	845	XP_002305183.1	predicted protein	Populus trichocarpa	452	287	8e-76	0.92	0.97	2
CO001329	875	XP_002285573.1	PREDICTED: hypothetical protein	Vitis vinifera	179	341	5e-92	0.93	0.96	3
CO001330	688	XP_002285578.1	PREDICTED: hypothetical protein	Vitis vinifera	116	224	7e-57	0.93	0.99	3
CO001331	1495	XP_002323358.1	predicted protein	Populus trichocarpa	660	685	0	0.68	0.78	2
CO001332	824	XP_002273298.1	PREDICTED: hypothetical protein	Vitis vinifera	822	240	1e-61	0.58	0.73	1
CO001333	386	YP_002870732.1	putative amidase	Pseudomonas fluorescens SBW25	440	190	4e-47	0.77	0.8	-1
CO001334	847	P22778.1	ATP synthase subunit O, mitochondrial	Ipomoea batatas	244	239	2e-61	0.69	0.78	1
CO001335	772	ACF06620.1	ribosomal protein S14	Elaeis guineensis	150	237	1e-60	0.87	0.88	3
CO001336	1596	ACN88681.1	VTC2-like protein	Malus x domestica	446	747	0	0.82	0.9	3
CO001337	1096	EEF34607.1	conserved hypothetical protein	Ricinus communis	138	210	2e-52	0.76	0.84	3
CO001338	686	XP_002275228.1	PREDICTED: hypothetical protein	Vitis vinifera	98	160	1e-37	0.79	0.87	1
CO001339	1060	EEF33334.1	acyltransferase, putative	Ricinus communis	359	254	1e-65	0.46	0.64	1
CO001340	977	ACD76815.1	histone 4	Capsella bursa-pastoris	96	162	5e-38	1	1	1
CO001341	599	CAL55839.1	Histones H3 and H4 (ISS)	Ostreococcus tauri	167	224	5e-57	0.81	0.83	1
CO001342	950	XP_002275283.1	PREDICTED: hypothetical protein isoform 2	Vitis vinifera	259	327	1e-87	0.65	0.8	2
CO001344	1274	EEF43150.1	dihydrolipoamide dehydrogenase, putative	Ricinus communis	510	556	e-156	0.86	0.92	2
CO001345	737	XP_002272092.1	PREDICTED: hypothetical protein isoform 2	Vitis vinifera	142	205	3e-51	0.81	0.89	2
CO001347	1200	XP_002310819.1	predicted protein	Populus trichocarpa	362	533	e-149	0.71	0.86	1
CO001348	914	XP_002313571.1	predicted protein	Populus trichocarpa	574	511	e-143	0.83	0.88	2
CO001349	500	XP_002285922.1	PREDICTED: hypothetical protein	Vitis vinifera	69	114	3e-24	0.88	0.98	3
CO001350	839	XP_002313053.1	predicted protein	Populus trichocarpa	206	404	e-111	0.95	0.98	3
CO001351	876	EEF46141.1	conserved hypothetical protein	Ricinus communis	221	299	2e-79	0.7	0.78	2
CO001352	573	AAL04507.1	glutaredoxin	Tilia platyphyllos	115	180	6e-44	0.8	0.91	1
CO001353	681	XP_002284969.1	PREDICTED: hypothetical protein	Vitis vinifera	159	276	9e-73	0.86	0.92	3
CO001354	1286	XP_002312425.1	predicted protein	Populus trichocarpa	322	60.8	3e-07	0.33	0.45	2
CO001355	841	XP_002314247.1	predicted protein	Populus trichocarpa	215	388	e-106	0.87	0.94	1
CO001356	329	XP_002162865.1	PREDICTED: similar to ebony CG3331-PA	Hydra magnipapillata	1195	123	7e-27	0.53	0.71	-2
CO001357	719	ABD65159.1	syntaxin, putative	Brassica oleracea	303	106	3e-26	0.58	0.7	1
CO001358	448	YP_002873923.1	putative thioesterase	Pseudomonas fluorescens SBW25	250	71.6	2e-11	0.91	0.97	3
CO001359	869	EEF48918.1	conserved hypothetical protein	Ricinus communis	392	286	1e-75	0.83	0.91	3
CO001360	866	XP_002302232.1	predicted protein	Populus trichocarpa	165	249	2e-64	0.81	0.81	1
CO001361	570	ABA12223.1	translation elongation factor 1A-7	Gossypium hirsutum	448	187	5e-46	1	1	3
CO001362	266	YP_002870090.1	3-dehydroquinate synthase	Pseudomonas fluorescens SBW25	366	178	2e-43	0.97	0.97	-3
CO001363	356	ACJ84857.1	unknown	Medicago truncatula	377	61.6	2e-08	0.89	1	1
CO001364	846	ACI46676.1	Cu/Zn superoxide dismutase	Gossypium arboreum	152	301	4e-80	0.95	0.97	2
CO001365	937	XP_002284365.1	PREDICTED: hypothetical protein	Vitis vinifera	216	314	9e-84	0.8	0.83	2
CO001366	1014	XP_002313053.1	predicted protein	Populus trichocarpa	206	389	e-106	0.92	0.95	3
CO001367	838	XP_002319269.1	histone 2	Populus trichocarpa	169	158	7e-37	0.7	0.71	1
CO001368	1096	XP_002262835.1	PREDICTED: hypothetical protein	Vitis vinifera	335	417	e-115	0.78	0.84	2
CO001369	976	XP_002284969.1	PREDICTED: hypothetical protein	Vitis vinifera	159	302	4e-80	0.89	0.94	2
CO001370	963	XP_002265394.1	PREDICTED: hypothetical protein	Vitis vinifera	233	256	2e-66	0.6	0.65	2
CO001371	630	XP_002328168.1	predicted protein	Populus trichocarpa	439	203	8e-51	0.58	0.66	3
CO001372	781	YP_002873961.1	flagellar motor switch protein	Pseudomonas fluorescens SBW25	155	221	4e-56	0.76	0.78	3
CO001373	850	XP_002322997.1	predicted protein	Populus trichocarpa	605	442	e-122	0.83	0.9	2
CO001374	1129	XP_002330501.1	predicted protein	Populus trichocarpa	568	520	e-145	0.85	0.89	3
CO001376	838	EEF30639.1	conserved hypothetical protein	Ricinus communis	163	103	3e-20	0.55	0.61	2
CO001377	1024	O23948.1	V-type proton ATPase subunit E	Gossypium hirsutum	237	400	e-109	0.89	0.89	3
CO001379	888	EEF33343.1	40S ribosomal protein S8, putative	Ricinus communis	219	311	7e-83	0.77	0.79	1
CO001380	915	ACF74351.1	putative metal ion-binding protein	Arachis hypogaea	232	104	1e-20	0.7	0.76	2
CO001381	877	YP_002875298.1	putative cation ABC transport system, substrate-binding protein	Pseudomonas fluorescens SBW25	340	478	e-133	0.96	0.97	2
CO001382	679	EEF47192.1	autophagy 8h, putative	Ricinus communis	125	209	2e-52	0.83	0.93	3
CO001383	1164	EEF50989.1	calmodulin, putative	Ricinus communis	147	276	4e-72	0.92	0.96	1
CO001384	1168	XP_002320444.1	hypothetical protein POPTRDRAFT_572918	Populus trichocarpa	568	324	1e-86	0.57	0.67	2
CO001385	351	ZP_02382918.1	hypothetical protein BuboB_34656	Burkholderia ubonensis Bu	259	78.2	3e-13	0.5	0.63	-3
CO001386	960	YP_002870328.1	putative transport related, membrane protein	Pseudomonas fluorescens SBW25	397	482	e-134	0.93	0.97	1
CO001387	1172	EEF50163.1	eukaryotic peptide chain release factor subunit, putative	Ricinuscommunis	436	570	e-161	0.92	0.96	1
CO001388	867	EEF50687.1	serine/threonine protein kinase, putative	Ricinus communis	347	523	e-147	0.91	0.94	3
CO001389	363	YP_001630973.1	cardiolipin synthase 2	Bordetella petrii DSM 12804	403	129	1e-28	0.6	0.67	-2
CO001390	893	EEF42190.1	voltage-dependent anion-selective channel, putative	Ricinuscommunis	276	449	e-124	0.81	0.89	2
CO001391	785	XP_002278214.1	PREDICTED: hypothetical protein	Vitis vinifera	192	293	9e-78	0.74	0.88	3
CO001392	1071	XP_002314963.1	predicted protein	Populus trichocarpa	399	432	e-129	0.81	0.84	2
CO001393	1735	XP_002271286.1	PREDICTED: hypothetical protein isoform 1	Vitis vinifera	477	612	e-173	0.74	0.8	2
CO001394	928	XP_002322150.1	predicted protein	Populus trichocarpa	233	406	e-111	0.98	0.98	3
CO001395	901	XP_002276731.1	PREDICTED: hypothetical protein	Vitis vinifera	171	281	5e-74	0.75	0.87	2
CO001396	114	YP_002869895.1	putative ABC sulfu transport system, substrate-binding protein	Pseudomonas fluorescens SBW25	333	66.2	1e-09	0.86	0.94	3
CO001397	1128	XP_002267227.1	PREDICTED: hypothetical protein	Vitis vinifera	313	489	e-136	0.74	0.84	3
CO001398	742	XP_002282641.1	PREDICTED: similar to ribosomal protein L10a	Vitis vinifera	216	328	3e-88	0.86	0.88	3
CO001400	1377	EEF42302.1	Protein kinase APK1B, chloroplast precursor, putative	Ricinuscommunis	534	742	0	0.86	0.9	3
CO001401	893	ACP28878.1	tonoplast intrinsic protein	Gossypium hirsutum	251	474	e-132	0.95	0.95	2
CO001403	836	XP_002278162.1	PREDICTED: hypothetical protein	Vitis vinifera	249	419	e-115	0.95	0.99	2
CO001404	683	EEF42190.1	voltage-dependent anion-selective channel, putative	Ricinuscommunis	276	166	2e-39	0.82	0.86	3
CO001405	921	NP_201231.1	EXL2 (EXORDIUM LIKE 2)	Arabidopsis thaliana	305	424	e-117	0.73	0.84	2
CO001406	802	XP_002308977.1	predicted protein	Populus trichocarpa	415	129	4e-28	0.5	0.67	1
CO001407	634	XP_002266453.1	PREDICTED: hypothetical protein	Vitis vinifera	285	210	9e-53	0.71	0.85	2
CO001408	864	EEF34143.1	ubiquitin-protein ligase, putative	Ricinus communis	467	340	1e-91	0.69	0.75	1
CO001409	856	XP_002278320.1	PREDICTED: hypothetical protein	Vitis vinifera	176	296	2e-78	0.85	0.92	1
CO001410	588	XP_002307505.1	predicted protein	Populus trichocarpa	2291	59.7	2e-07	0.36	0.55	1
CO001411	1145	AAB62937.1	stress-induced cysteine proteinase	Lavatera thuringiaca	175	283	2e-74	0.91	0.97	1
CO001412	1020	XP_002304871.1	predicted protein	Populus trichocarpa	190	181	1e-43	0.58	0.66	2
CO001413	1436	XP_002284045.1	PREDICTED: hypothetical protein	Vitis vinifera	351	523	e-146	0.74	0.82	1
CO001414	895	XP_002319372.1	predicted protein	Populus trichocarpa	304	420	e-115	0.78	0.86	1
CO001415	833	XP_002278252.1	PREDICTED: hypothetical protein	Vitis vinifera	154	267	1e-69	0.82	0.92	3
CO001416	530	EEF30795.1	ribosomal protein S28, putative	Ricinus communis	65	102	1e-20	0.94	0.98	2
CO001417	886	ABO43717.1	profilin	Gossypium hirsutum	133	280	1e-73	1	1	2
CO001418	620	XP_002329697.1	predicted protein	Populus trichocarpa	205	327	5e-88	0.91	0.92	3
CO001419	632	EEF43886.1	nuclear acid binding protein, putative	Ricinus communis	430	165	2e-39	0.73	0.77	3
CO001420	848	XP_002285750.1	PREDICTED: hypothetical protein	Vitis vinifera	705	452	e-125	0.76	0.85	2
CO001421	466	YP_002874314.1	short chain dehydrogenase	Pseudomonas fluorescens SBW25	252	199	8e-50	0.85	0.95	-1
CO001422	543	XP_002267144.1	PREDICTED: hypothetical protein	Vitis vinifera	124	129	1e-28	0.75	0.84	2
CO001423	825	XP_002324389.1	predicted protein	Populus trichocarpa	366	323	1e-86	0.71	0.84	3
CO001424	865	XP_002279525.1	PREDICTED: hypothetical protein	Vitis vinifera	236	390	e-107	0.88	0.94	1
CO001426	779	XP_002265041.1	PREDICTED: hypothetical protein	Vitis vinifera	160	246	2e-63	0.83	0.86	1
CO001427	728	ACI77191.1	malate dehydrogenase	Escherichia coli	312	426	e-117	1	1	2
CO001428	901	YP_002874244.1	putative two component system, sensor kinase	Pseudomonas fluorescens SBW25	536	479	e-133	0.84	0.88	-1
CO001429	1115	XP_002262697.1	PREDICTED: hypothetical protein	Vitis vinifera	245	350	2e-94	0.73	0.78	3
CO001430	1364	XP_002268799.1	PREDICTED: hypothetical protein	Vitis vinifera	557	854	0	0.94	0.97	2
CO001431	807	XP_002272670.1	PREDICTED: hypothetical protein isoform 1	Vitis vinifera	69	58.5	7e-07	0.76	0.88	2
CO001432	522	YP_002873057.1	putative phosphotransferase	Pseudomonas fluorescens SBW25	355	303	3e-81	0.96	0.96	-2
CO001434	1123	AAM65998.1	putative dTDP-glucose 4-6-dehydratase	Arabidopsis thaliana	389	448	e-124	0.92	0.96	1
CO001435	387	YP_002871960.1	putative transport related membrane protein	Pseudomonas fluorescens SBW25	486	166	5e-40	0.81	0.88	-3
CO001436	1108	EEF44561.1	acetyltransferase complex ard1 subunit, putative	Ricinus communis	204	330	2e-88	0.8	0.84	1
CO001437	605	CAN60816.1	hypothetical protein	Vitis vinifera	82	161	3e-38	0.95	0.96	1
CO001438	885	EEF52698.1	Auxin-induced protein 6B, putative	Ricinus communis	151	175	6e-42	0.55	0.68	1
CO001439	1126	XP_002274188.1	PREDICTED: hypothetical protein	Vitis vinifera	593	428	e-118	0.71	0.81	1
CO001440	968	XP_002271105.1	PREDICTED: hypothetical protein	Vitis vinifera	585	438	e-121	0.81	0.85	1
CO001441	675	XP_002313617.1	predicted protein	Populus trichocarpa	112	209	2e-52	0.97	0.99	1
CO001442	776	XP_002271455.1	PREDICTED: hypothetical protein	Vitis vinifera	586	189	2e-46	0.51	0.62	3
CO001443	1153	EEF28880.1	conserved hypothetical protein	Ricinus communis	258	410	e-112	0.78	0.86	3
CO001444	1272	NP_565522.1	SKIP6 (SKP1 interacting partner 6); ubiquitin-protein ligase	Arabidopsis thaliana	372	61.2	2e-07	0.25	0.41	1
CO001445	851	NP_564098.2	AVA-P2; ATPase/ proton-transporting ATPase, rotational mechanism	Arabidopsis thaliana	165	223	2e-56	0.74	0.74	1
CO001446	774	AAY41234.1	putative peptidyl-prolyl cis-trans isomerase	Gossypium hirsutum	143	223	1e-56	0.99	1	1
CO001448	321	AAA25813.1	esterase	Pseudomonas sp.	389	90.9	4e-17	0.89	0.91	-1
CO001449	882	EEF35075.1	double-stranded RNA binding protein, putative	Ricinus communis	219	149	3e-34	0.46	0.6	2
CO001450	442	YP_257828.1	hypothetical protein PFL_0686	Pseudomonas fluorescens Pf-5	664	73.6	6e-12	0.35	0.49	2
CO001451	811	EEF45234.1	acireductone dioxygenase, putative	Ricinus communis	200	379	e-103	0.87	0.93	2
CO001452	710	EEF29881.1	40S ribosomal protein S11, putative	Ricinus communis	159	288	4e-76	0.88	0.9	1
CO001454	704	XP_002327394.1	predicted protein	Populus trichocarpa	478	385	e-105	0.79	0.88	1
CO001455	322	YP_002944768.1	ABC transporter related	Variovorax paradoxus S110	261	108	1e-22	0.86	0.93	3
CO001456	614	EEF34062.1	conserved hypothetical protein	Ricinus communis	436	228	4e-58	0.65	0.77	2
CO001457	1571	EEF49444.1	diaminopimelate decarboxylase, putative	Ricinus communis	488	827	0	0.86	0.92	1
CO001458	764	EEF28717.1	heparanase, putative	Ricinus communis	551	323	1e-86	0.66	0.76	3
CO001459	778	EEF35806.1	utp-glucose-1-phosphate uridylyltransferase, putative	Ricinuscommunis	470	320	7e-86	0.88	0.95	2
CO001460	886	XP_002321547.1	predicted protein	Populus trichocarpa	306	515	e-144	0.97	0.97	2
CO001461	381	YP_410160.1	nitrogen regulation protein NR(II)	Shigella boydii Sb227	349	249	6e-65	1	1	3
CO001462	637	ABJ88950.2	glyoxalase I	Arachis hypogaea	187	216	9e-55	0.86	0.92	2
CO001463	521	XP_002327526.1	predicted protein	Populus trichocarpa	371	64.7	4e-09	0.46	0.57	1
CO001464	1134	XP_002319260.1	GH3 family protein	Populus trichocarpa	611	336	3e-90	0.84	0.89	1
CO001465	885	XP_002307854.1	predicted protein	Populus trichocarpa	201	196	3e-48	0.57	0.75	1
CO001466	855	EEF34393.1	conserved hypothetical protein	Ricinus communis	440	243	1e-62	0.54	0.68	1
CO001467	525	XP_002306886.1	predicted protein	Populus trichocarpa	377	68.6	2e-10	0.65	0.7	1
CO001468	732	XP_002271288.1	PREDICTED: hypothetical protein	Vitis vinifera	125	217	7e-55	0.81	0.87	2
CO001469	856	XP_002298780.1	predicted protein	Populus trichocarpa	196	343	9e-93	0.85	0.92	1
CO001470	737	XP_002271480.1	PREDICTED: hypothetical protein	Vitis vinifera	311	327	7e-88	0.94	0.98	2
CO001471	689	EEF47370.1	acyl carrier protein, putative	Ricinus communis	128	192	2e-47	0.77	0.86	1
CO001472	1038	ACJ85744.1	unknown	Medicago truncatula	417	468	e-130	0.78	0.81	1
CO001473	1180	XP_002318114.1	predicted protein	Populus trichocarpa	338	520	e-145	0.86	0.91	2
CO001474	989	XP_002264689.1	PREDICTED: hypothetical protein isoform 1	Vitis vinifera	443	505	e-141	0.87	0.9	3
CO001475	366	AAS77347.1	sadtomato protein	Capsicum annuum	201	112	1e-23	0.81	0.96	3
CO001477	1092	ABK94126.1	unknown	Populus trichocarpa	251	282	6e-79	0.71	0.8	3
CO001478	827	EEF28483.1	galactolipid galactosyltransferase, putative	Ricinus communis	797	298	5e-79	0.68	0.79	1
CO001479	1206	XP_002326956.1	predicted protein	Populus trichocarpa	328	571	e-161	0.87	0.93	2
CO001480	881	XP_002281306.1	PREDICTED: hypothetical protein	Vitis vinifera	373	390	e-106	0.73	0.86	1
CO001481	790	XP_002304601.1	predicted protein	Populus trichocarpa	304	392	e-107	0.79	0.91	3
CO001482	787	AAX84677.1	auxin-repressed protein-like protein ARP1	Manihot esculenta	117	167	1e-39	0.67	0.79	2
CO001484	788	CAO61841.1	unnamed protein product	Vitis vinifera	142	249	3e-64	0.95	0.97	1
CO001486	736	XP_002266525.1	PREDICTED: hypothetical protein	Vitis vinifera	140	181	6e-44	0.79	0.89	3
CO001487	328	XP_002322549.1	predicted protein	Populus trichocarpa	450	114	2e-24	0.9	0.96	2
CO001488	321	AAF35186.1	lipid transfer protein precursor	Gossypium hirsutum	120	73.9	5e-12	0.97	1	3
CO001489	1185	ABO47736.1	alpha-tubulin	Gossypium hirsutum	450	442	e-122	0.92	0.92	1
CO001490	477	AAV74186.1	metallothionein-like protein	Gossypium hirsutum	82	123	7e-27	1	1	-1
CO001491	1652	EEF28699.1	conserved hypothetical protein	Ricinus communis	509	311	e-154	0.76	0.85	1
CO001492	835	XP_002264651.1	PREDICTED: hypothetical protein	Vitis vinifera	359	266	2e-69	0.64	0.75	3
17-O23	740	XP_002331751.1	predicted protein	Populus trichocarpa	266	298	4e-79	0.92	0.99	1
20-D22	774	XP_002262674.1	PREDICTED: hypothetical protein	Vitis vinifera	800	405	e-111	0.81	0.85	2
20-E02	832	AAD53877.1	SINAH1 protein	Gossypium hirsutum	336	446	e-123	0.9	0.9	2
23-F23	829	XP_002262921.1	PREDICTED: hypothetical protein	Vitis vinifera	386	420	e-115	0.83	0.92	1
23-F24	126	NP_886464.1	RNA polymerase sigma-54 factor	Bordetella parapertussis 12822	479	81.6	2e-14	0.97	0.97	-3
23-G01	564	EEF39917.1	ATP binding protein, putative	Ricinus communis	612	260	4e-68	0.89	0.95	1
23-G02	831	XP_002267514.1	PREDICTED: hypothetical protein	Vitis vinifera	1006	421	e-116	0.78	0.85	2
23-G07	611	CAN60012.1	hypothetical protein	Vitis vinifera	306	70.9	7e-11	0.41	0.56	2
23-G13	219	YP_001565499.1	ABC transporter related	Delftia acidovorans SPH-1	264	121	2e-26	0.87	0.94	1
23-G15	850	CAI56324.1	TPA: leucoanthocyanidin reductase 1	Gossypium raimondii	351	550	e-155	1	1	2
23-G16	867	CAO67400.1	unnamed protein product	Vitis vinifera	516	357	8e-97	0.66	0.79	2
23-G18	688	XP_002298675.1	predicted protein	Populus trichocarpa	461	283	1e-74	0.64	0.78	3
23-G20	436	EEF45197.1	conserved hypothetical protein	Ricinus communis	76	95.9	1e-18	0.87	1	1
23-G24	857	EEE53976.1	hypothetical protein OsJ_00596	Oryza sativa Japonica Group	1066	87.4	2e-15	0.26	0.4	-2
23-H04	824	NP_001066197.1	Os12g0156200	Oryza sativa (japonica cultivar-group)	2367	50.8	2e-08	0.25	0.5	-2
23-H09	457	XP_002328772.1	predicted protein	Populus trichocarpa	237	84.3	4e-15	0.7	0.84	3
23-H12	552	P46290.1	60S ribosomal protein L31	Nicotiana glutinosa	120	100	4e-37	0.66	0.73	1
23-H16	775	BAD05323.1	hypothetical protein	Oryza sativa Japonica Group	128	114	1e-23	0.66	0.8	3
23-H18	516	XP_002309149.1	predicted protein	Populus trichocarpa	876	178	2e-43	0.91	0.93	2
23-H20	532	XP_002277407.1	PREDICTED: hypothetical protein	Vitis vinifera	829	171	2e-41	0.73	0.8	3
23-H22	754	XP_002298527.1	predicted protein	Populus trichocarpa	471	276	1e-72	0.59	0.71	1
23-H23	841	XP_002303801.1	predicted protein	Populus trichocarpa	486	381	e-104	0.84	0.9	3
23-I04	379	EEF48877.1	transcription factor, putative	Ricinus communis	454	73.2	8e-12	0.43	0.57	3
23-I12	835	EEF39222.1	ferredoxin--NADP reductase, putative	Ricinus communis	378	528	e-148	0.89	0.94	2
23-I23	648	CAJ77893.1	GASA	Fagus sylvatica	107	216	1e-54	0.85	0.92	1
23-J02	564	XP_002318085.1	predicted protein	Populus trichocarpa	329	316	6e-85	0.86	0.92	1
23-J11	792	BAF98279.1	hydroxymethylglutaryl-CoA synthase	Hevea brasiliensis	464	283	1e-74	0.89	0.96	3
23-J12	753	EEF51609.1	WD-repeat protein, putative	Ricinus communis	458	414	e-114	0.92	0.97	2
23-J15	469	CAO42013.1	unnamed protein product	Vitis vinifera	151	137	1e-46	1	1	3
36-A21	874	YP_001668816.1	ABC transporter related	Pseudomonas putida GB-1	255	324	8e-87	0.85	0.9	-1
38-C15	858	ABK94132.1	unknown	Populus trichocarpa	229	249	3e-64	0.62	0.73	3
01-I04	830	EEF49286.1	Transportin-3, putative	Ricinus communis	1020	143	3e-54	0.67	0.75	3
01-I06	822	XP_002271601.1	PREDICTED: hypothetical protein	Vitis vinifera	320	349	2e-94	0.73	0.85	1
01-I11	648	XP_002270339.1	PREDICTED: hypothetical protein	Vitis vinifera	116	189	2e-46	0.79	0.83	2
01-I20	534	EEF41669.1	Cytochrome c oxidase polypeptide Vc, putative	Ricinus communis	63	120	6e-26	0.88	0.93	-2
01-J01	822	XP_002311814.1	predicted protein	Populus trichocarpa	921	176	2e-74	0.81	0.87	3
01-J05	603	XP_002270400.1	PREDICTED: hypothetical protein	Vitis vinifera	510	336	7e-91	0.9	0.95	3
01-J08	776	EEF43783.1	coproporphyrinogen III oxidase, putative	Ricinus communis	393	341	5e-92	0.72	0.8	2
01-J19	478	XP_002329111.1	predicted protein	Populus trichocarpa	108	91.7	2e-17	0.46	0.57	1
01-K04	283	XP_002298353.1	alpha-expansin family protein	Populus trichocarpa	262	202	1e-50	0.94	0.98	3
01-K05	604	XP_002279389.1	PREDICTED: hypothetical protein	Vitis vinifera	240	225	2e-57	0.91	0.95	2
01-K08	828	XP_002327993.1	predicted protein	Populus trichocarpa	434	461	e-128	0.92	0.96	2
01-K09	800	EEF31110.1	dtdp-glucose 4-6-dehydratase, putative	Ricinus communis	376	520	e-146	0.94	0.98	1
01-K10	802	EEF35065.1	golgi snare 11 protein, putative	Ricinus communis	253	389	e-106	0.89	0.94	1
01-K11	719	EEF35034.1	E3 ubiquitin protein ligase upl2, putative	Ricinus communis	3666	212	2e-53	0.97	1	2
01-L12	854	AAX99411.1	patatin-like protein	Gossypium hirsutum	434	578	e-163	1	1	1
01-L15	660	EEF31023.1	RNA and export factor binding protein, putative	Ricinus communis	247	221	3e-56	0.6	0.68	2
01-L16	906	XP_002300699.1	predicted protein	Populus trichocarpa	258	380	e-103	0.73	0.86	3
01-M12	698	EEF47174.1	conserved hypothetical protein	Ricinus communis	482	401	e-110	0.82	0.9	2
01-M14	706	XP_002323946.1	predicted protein	Populus trichocarpa	414	161	6e-38	0.64	0.78	1
01-M19	588	EEF43886.1	nuclear acid binding protein, putative	Ricinus communis	430	155	2e-36	0.85	0.9	1
01-N08	718	XP_002269975.1	PREDICTED: hypothetical protein	Vitis vinifera	419	237	9e-61	0.62	0.75	2
01-N11	666	EEF40793.1	big map kinase/bmk, putative	Ricinus communis	368	431	e-119	0.91	0.96	1
01-N12	466	ABO41834.1	putative caffeic acid methyltransferase	Gossypium raimondii	358	307	3e-82	0.98	0.99	2
01-N14	634	EEF49617.1	conserved hypothetical protein	Ricinus communis	605	135	2e-30	0.9	0.9	3
01-N15	880	XP_002306655.1	predicted protein	Populus trichocarpa	697	465	e-129	0.85	0.91	1
01-N17	741	EEF30763.1	alpha-glucosidase, putative	Ricinus communis	930	380	e-104	0.82	0.88	3
01-N19	645	AAM64754.1	unknown	Arabidopsis thaliana	250	231	5e-59	0.61	0.72	3
01-N20	714	ABD28505.2	RNA-directed DNA polymerase (Reverse transcriptase);Polynucleotidyl transferase, Ribonuclease H fold	Medicago truncatula	729	154	6e-36	0.34	0.56	2
01-O04	773	P30167.1	Actin-58	Solanum tuberosum	377	500	e-140	0.95	0.99	2
01-O06	790	XP_002268974.1	PREDICTED: hypothetical protein	Vitis vinifera	553	367	e-100	0.73	0.8	1
01-O10	308	YP_001629504.1	Holliday junction DNA helicase B	Bordetella petrii DSM 12804	353	130	3e-39	0.89	0.93	-1
01-P08	712	XP_002324292.1	predicted protein	Populus trichocarpa	133	176	2e-42	0.81	0.87	2
01-P12	661	XP_002275124.1	PREDICTED: hypothetical protein	Vitis vinifera	674	193	1e-47	0.84	0.89	1
01-P16	822	XP_002299451.1	predicted protein	Populus trichocarpa	312	252	3e-65	0.54	0.71	2
01-P18	481	ABA81856.1	unknown	Solanum tuberosum	194	139	7e-32	0.93	1	2
01-P21	840	EEF51002.1	conserved hypothetical protein	Ricinus communis	342	285	3e-75	0.63	0.73	1
01-P23	809	AAT36215.1	DNA repair and transcription factor XPB1	Arabidopsis thaliana	767	503	e-141	0.91	0.93	1
02-A02	518	ACJ85516.1	unknown	Medicago truncatula	267	174	4e-42	0.93	0.98	1
02-A13	670	XP_002325506.1	predicted protein	Populus trichocarpa	829	400	e-110	0.87	0.95	1
02-A24	874	CAN67759.1	hypothetical protein	Vitis vinifera	385	323	1e-86	0.71	0.83	1
02-B13	852	XP_002279073.1	PREDICTED: hypothetical protein	Vitis vinifera	1121	328	e-135	0.91	0.96	1
02-B17	639	XP_002313491.1	predicted protein	Populus trichocarpa	220	172	2e-41	0.85	0.9	1
02-B21	739	EEF43588.1	U520, putative	Ricinus communis	1809	429	e-131	0.95	0.99	3
02-B23	181	YP_002874715.1	exonuclease V alpha-subunit	Pseudomonas fluorescens SBW25	701	78.2	3e-13	0.7	0.74	1
02-C04	326	EEF42498.1	transporter, putative	Ricinus communis	507	121	2e-26	0.59	0.76	1
02-C13	667	EEF52009.1	kinesin light chain, putative	Ricinus communis	767	126	2e-27	0.51	0.59	3
02-C15	844	EEF48253.1	Protein cbxX, chromosomal, putative	Ricinus communis	481	464	e-129	0.8	0.89	1
02-C19	859	XP_002316239.1	predicted protein	Populus trichocarpa	306	365	4e-99	0.92	0.97	3
02-C22	811	XP_002274615.1	PREDICTED: hypothetical protein	Vitis vinifera	182	129	2e-48	0.58	0.7	1
02-C24	806	EEF35776.1	ubiquitin-activating enzyme E1, putative	Ricinus communis	1107	180	2e-43	0.59	0.69	3
02-D01	854	XP_002263398.1	PREDICTED: hypothetical protein	Vitis vinifera	422	343	2e-92	0.91	0.95	2
02-D07	266	YP_001480300.1	filamentous haemagglutinin outer membrane protein	Serratiaproteamaculans 568	3602	85.9	1e-15	0.51	0.65	-2
02-D20	823	NP_849798.1	ATMMH-1 (ARABIDOPSIS THALIANA MUTM HOMOLOG-1); DNA N-glycosylase	Arabidopsis thaliana	274	415	e-114	0.81	0.89	1
02-E03	880	ABN08957.1	H+-transporting two-sector ATPase, C (AC39) subunit	Medicago truncatula	351	471	e-131	0.98	0.99	3
02-E04	178	YP_002873261.1	hypothetical protein PFLU3703	Pseudomonas fluorescens SBW25	612	115	1e-24	1	1	-1
02-E06	808	XP_002273260.1	PREDICTED: hypothetical protein	Vitis vinifera	563	479	e-133	0.86	0.92	1
02-E08	736	EEF38817.1	phospholipase C, putative	Ricinus communis	420	263	1e-68	0.7	0.82	2
02-E20	811	ACI62779.1	lipase	Jatropha curcas	356	406	e-111	0.8	0.88	3
02-E22	824	XP_002275920.1	PREDICTED: hypothetical protein	Vitis vinifera	599	433	e-119	0.79	0.88	2
02-E24	813	XP_002275982.1	PREDICTED: hypothetical protein	Vitis vinifera	297	283	1e-74	0.77	0.85	2
02-F03	874	YP_002874181.1	putative amino transferase	Pseudomonas fluorescens SBW25	241	378	e-103	0.91	0.96	1
02-F04	848	EEF39798.1	Auxin response factor, putative	Ricinus communis	730	343	1e-92	0.65	0.75	1
02-F06	807	XP_002302340.1	predicted protein	Populus trichocarpa	446	431	e-125	0.9	0.95	2
02-F07	829	XP_002282307.1	PREDICTED: hypothetical protein	Vitis vinifera	727	202	2e-50	0.44	0.58	1
02-F09	534	YP_002874491.1	putative sulfatase	Pseudomonas fluorescens SBW25	649	345	9e-94	0.93	0.97	-1
02-F10	710	XP_002273708.1	PREDICTED: hypothetical protein	Vitis vinifera	536	347	4e-94	0.87	0.95	3
02-F12	867	XP_002311140.1	predicted protein	Populus trichocarpa	794	382	e-104	0.75	0.79	3
02-F19	818	EEF43518.1	conserved hypothetical protein	Ricinus communis	536	265	4e-69	0.49	0.66	2
02-F22	762	ABQ42057.1	putative translation factor	Sonneratia alba	114	194	7e-48	0.84	0.86	3
02-G05	444	XP_002272848.1	PREDICTED: hypothetical protein	Vitis vinifera	282	106	7e-22	0.75	0.95	1
02-G09	307	EEF43792.1	protein with unknown function	Ricinus communis	373	180	5e-44	0.9	0.94	3
02-G10	814	YP_002873054.1	serine transporter	Pseudomonas fluorescens SBW25	425	464	e-129	0.86	0.88	2
02-G12	881	EEF49634.1	protein arginine n-methyltransferase, putative	Ricinus communis	406	301	4e-80	0.7	0.79	1
02-G21	823	XP_002284504.1	PREDICTED: hypothetical protein	Vitis vinifera	223	193	2e-47	0.72	0.79	3
02-G22	848	XP_002304917.1	predicted protein	Populus trichocarpa	137	191	1e-46	0.87	0.91	2
02-G23	710	XP_002276973.1	PREDICTED: hypothetical protein	Vitis vinifera	261	182	2e-44	0.68	0.71	2
02-H03	841	XP_002336405.1	predicted protein	Populus trichocarpa	144	204	8e-51	0.73	0.81	3
02-H06	801	XP_002303829.1	predicted protein	Populus trichocarpa	469	247	1e-63	0.52	0.63	2
02-H10	670	EEF52894.1	conserved hypothetical protein	Ricinus communis	166	155	2e-36	0.61	0.71	1
02-H13	785	ABK96151.1	unknown	Populus trichocarpa	311	332	2e-89	0.77	0.89	2
02-H16	768	EEF50312.1	conserved hypothetical protein	Ricinus communis	267	266	2e-69	0.71	0.82	2
02-H17	646	NP_881300.1	putative integral membrane zinc-metalloprotease	Bordetellapertussis Tohama I	421	196	2e-48	0.87	0.92	-3
02-H19	415	Q8W4Z5.1	UPF0497 membrane protein f16	Gossypium hirsutum	207	162	1e-38	0.97	0.98	3
02-I08	835	EEF36773.1	transcription factor, putative	Ricinus communis	702	411	e-113	0.72	0.79	3
02-I10	393	YP_285391.1	Rhs element Vgr protein	Dechloromonas aromatica RCB	911	149	1e-34	0.55	0.75	2
02-I14	390	EEF38977.1	glucosidase II beta subunit, putative	Ricinus communis	683	118	2e-25	0.84	0.96	1
02-I19	773	EEF34099.1	translation initiation factor, putative	Ricinus communis	396	97.4	8e-34	0.51	0.56	2
02-I21	811	NP_567003.2	BZIP25 (BASIC LEUCINE ZIPPER 25); protein heterodimerization/transcription factor	Arabidopsis thaliana	403	164	7e-39	0.42	0.5	3
02-I24	852	EEF36233.1	glycogenin, putative	Ricinus communis	656	560	e-158	0.91	0.97	3
02-J09	560	YP_001632451.1	TonB-dependent outer membrane receptor	Bordetella petrii DSM12804	814	271	3e-71	0.67	0.8	-1
02-J10	750	YP_002799773.1	Periplasmic binding protein/LacI transcriptional regulator protein	Azotobacter vinelandii DJ	308	318	2e-85	0.7	0.84	2
02-J17	415	XP_002305407.1	predicted protein	Populus trichocarpa	54	101	2e-20	0.85	0.92	2
02-J19	775	XP_002326994.1	predicted protein	Populus trichocarpa	546	391	e-107	0.83	0.87	3
02-J23	773	XP_002301486.1	predicted protein	Populus trichocarpa	450	455	e-126	0.86	0.94	1
02-J24	799	EEF29034.1	poly(ADP-ribose) glycohydrolase, putative	Ricinus communis	553	147	3e-52	0.67	0.77	2
02-K09	756	EEF36326.1	proteasome subunit beta type 7,10, putative	Ricinus communis	278	472	e-131	0.91	0.94	2
02-K11	834	XP_002327526.1	predicted protein	Populus trichocarpa	371	340	1e-91	0.8	0.82	3
02-K16	467	XP_002310326.1	predicted protein	Populus trichocarpa	410	166	7e-40	0.92	0.97	2
02-K17	302	YP_001811631.1	mandelate racemase/muconate lactonizing protein	Burkholderiaambifaria MC40-6	425	79.3	1e-13	0.85	0.88	2
02-K22	830	XP_002297662.1	predicted protein	Populus trichocarpa	394	400	e-109	0.85	0.9	1
02-K23	800	AAS48176.1	Osmolarity-sensing histidine-kinase	Pseudomonas fluorescens	437	483	e-135	0.9	0.93	-1
02-K24	689	EEF40387.1	calcium ion binding protein, putative	Ricinus communis	542	275	3e-72	0.88	0.94	3
02-L12	750	XP_002330535.1	predicted protein	Populus trichocarpa	643	233	1e-59	0.53	0.7	2
02-L14	650	EEF47173.1	Calcium-activated outward-rectifying potassium channel, putative	Ricinus communis	390	238	4e-61	0.69	0.77	1
02-L19	630	AAC28505.1	Similar to protein kinase APK1A, tyrosine-serine-threonine kinase	Arabidopsis thaliana	420	72.8	2e-11	0.8	0.97	3
02-L24	811	XP_002304866.1	predicted protein	Populus trichocarpa	313	231	3e-75	0.95	0.96	2
02-M04	661	XP_002281433.1	PREDICTED: hypothetical protein	Vitis vinifera	428	270	6e-71	0.68	0.79	1
02-M07	282	ABN05708.1	Short-chain dehydrogenase/reductase SDR	Medicago truncatula	321	79	1e-13	0.69	0.83	-2
02-M08	673	XP_002285428.1	PREDICTED: hypothetical protein	Vitis vinifera	207	183	1e-44	0.55	0.61	3
02-M14	722	XP_002331484.1	predicted protein	Populus trichocarpa	136	229	2e-58	0.84	0.9	2
02-M16	776	EEF38981.1	Protein kinase APK1B, chloroplast precursor, putative	Ricinuscommunis	385	390	e-107	0.78	0.86	3
02-M19	173	XP_002303787.1	predicted protein	Populus trichocarpa	915	108	1e-22	0.87	0.94	2
02-N03	865	NP_178521.1	indole-3-glycerol phosphate synthase (IGPS)	Arabidopsis thaliana	402	294	7e-88	0.79	0.89	1
02-N04	755	EEF48601.1	glucose-6-phosphate isomerase, putative	Ricinus communis	618	488	e-136	0.94	0.98	3
02-N05	722	ACN26595.1	unknown	Zea mays	556	435	e-120	0.88	0.93	1
02-N20	752	XP_002284215.1	PREDICTED: hypothetical protein	Vitis vinifera	243	239	1e-61	0.57	0.64	1
02-N21	401	XP_002301997.1	predicted protein	Populus trichocarpa	523	117	3e-25	0.63	0.85	2
02-O02	721	XP_002305871.1	predicted protein	Populus trichocarpa	216	207	6e-52	0.57	0.7	3
02-O09	773	XP_002329585.1	predicted protein	Populus trichocarpa	612	285	4e-75	0.9	0.94	2
02-O11	712	XP_002315359.1	predicted protein	Populus trichocarpa	750	317	7e-85	0.84	0.89	1
02-O12	737	XP_002266148.1	PREDICTED: hypothetical protein	Vitis vinifera	361	315	3e-84	0.64	0.79	1
02-O13	541	EEF52347.1	l-asparaginase, putative	Ricinus communis	327	226	1e-57	0.84	0.89	-2
02-O19	784	ABK94712.1	unknown	Populus trichocarpa	205	238	6e-61	0.72	0.86	3
02-O20	820	XP_002330501.1	predicted protein	Populus trichocarpa	568	343	1e-92	0.66	0.76	3
02-P09	837	XP_002333721.1	nbs-lrr resistance protein	Populus trichocarpa	880	155	6e-36	0.4	0.56	3
02-P13	257	YP_001629076.1	AraC family transcriptional regulator	Bordetella petrii DSM 12804	349	79.3	1e-13	0.82	0.91	-3
02-P18	832	XP_002310095.1	predicted protein	Populus trichocarpa	240	265	3e-69	0.59	0.68	1
02-P21	696	EEF50077.1	conserved hypothetical protein	Ricinus communis	119	152	3e-35	0.72	0.83	1
02-P23	481	BAE96756.1	homolog of mammalian PITSLRE alpha protein kinase	Nicotiana tabacum	321	132	8e-37	0.89	0.97	1
03-A04	821	XP_002285913.1	PREDICTED: hypothetical protein	Vitis vinifera	541	365	4e-99	0.82	0.94	1
03-A09	758	EEF34119.1	rnase l inhibitor, putative	Ricinus communis	591	419	e-115	0.95	0.99	2
03-A10	783	XP_002325549.1	predicted protein	Populus trichocarpa	409	369	e-100	0.68	0.77	1
03-A11	366	YP_001371314.1	TonB-dependent siderophore receptor	Ochrobactrum anthropi ATCC 49188	817	128	2e-28	0.48	0.71	1
03-A17	564	ABA01476.1	ACC oxidase ACO4	Gossypium hirsutum	310	223	1e-56	0.83	0.86	-1
03-A20	726	XP_002274525.1	PREDICTED: hypothetical protein isoform 1	Vitis vinifera	191	274	7e-72	0.74	0.85	1
03-A24	558	EEF51579.1	ribosomal protein L15, putative	Ricinus communis	204	165	2e-39	0.97	0.97	2
03-B01	788	XP_002302309.1	predicted protein	Populus trichocarpa	329	121	1e-40	0.55	0.61	1
03-B05	897	CAO15972.1	unnamed protein product	Vitis vinifera	274	316	2e-84	0.66	0.75	3
03-B21	824	ABK96176.1	unknown	Populus trichocarpa	294	399	e-109	0.98	0.99	1
03-C02	799	XP_002264210.1	PREDICTED: hypothetical protein	Vitis vinifera	367	417	e-115	0.9	0.95	1
03-C03	784	XP_002305145.1	predicted protein	Populus trichocarpa	214	275	3e-72	0.63	0.73	1
03-C05	685	CAC86004.1	aspartic proteinase	Theobroma cacao	514	422	e-116	0.87	0.96	1
03-C14	820	EEF31175.1	conserved hypothetical protein	Ricinus communis	192	160	2e-37	0.49	0.59	2
03-D02	367	YP_002875284.1	hypothetical protein PFLU5795	Pseudomonas fluorescens SBW25	398	244	2e-63	1	1	2
03-D07	820	XP_002331535.1	predicted protein	Populus trichocarpa	415	293	1e-77	0.71	0.85	3
03-D08	752	EEF45268.1	lipid binding protein, putative	Ricinus communis	206	242	2e-62	0.6	0.7	3
03-D12	375	XP_002266901.1	PREDICTED: hypothetical protein	Vitis vinifera	54	94.7	3e-18	0.79	0.9	2
03-D19	791	XP_002321899.1	predicted protein	Populus trichocarpa	198	304	7e-81	0.77	0.86	1
03-D21	736	CAO65159.1	unnamed protein product	Vitis vinifera	1757	291	4e-77	0.61	0.74	2
03-D22	300	EEF33113.1	3-hydroxyisobutyrate dehydrogenase, putative	Ricinus communis	308	58.2	3e-07	0.78	0.87	1
03-D24	481	EEF47801.1	Protein C6orf149, putative	Ricinus communis	92	123	5e-27	0.74	0.91	1
03-E02	819	XP_002263210.1	PREDICTED: hypothetical protein	Vitis vinifera	292	408	e-112	0.94	0.97	2
03-E06	329	EEF43629.1	phosphoprotein phosphatase, putative	Ricinus communis	612	56.6	8e-07	0.78	0.96	1
03-E12	863	XP_002302169.1	cellulose synthase	Populus trichocarpa	1093	537	e-151	0.86	0.92	2
03-E13	609	CAN60816.1	hypothetical protein	Vitis vinifera	82	159	2e-37	0.92	0.96	2
03-E20	818	XP_002266077.1	PREDICTED: hypothetical protein	Vitis vinifera	216	244	7e-63	0.62	0.73	3
03-E21	591	XP_002303525.1	predicted protein	Populus trichocarpa	410	116	1e-24	0.91	0.95	2
03-E22	772	EEF34069.1	clathrin heavy chain, putative	Ricinus communis	1705	475	e-132	0.91	0.94	2
03-F03	842	YP_002870405.1	putative peptidoglycan biosynthesis protein	Pseudomonas fluorescens SBW25	264	280	9e-74	0.93	0.98	1
03-F04	589	XP_002271949.1	PREDICTED: hypothetical protein	Vitis vinifera	296	116	1e-24	0.65	0.71	3
03-F07	825	XP_002281335.1	PREDICTED: hypothetical protein	Vitis vinifera	418	369	e-100	0.75	0.82	2
03-F13	789	CAN80644.1	hypothetical protein	Vitis vinifera	774	142	4e-32	0.32	0.55	2
03-F14	477	EEF43682.1	DNA binding protein, putative	Ricinus communis	433	162	1e-38	0.71	0.79	3
03-F19	513	ZP_03397994.1	filamentous hemagglutinin	Pseudomonas syringae pv. tomato T1	6072	164	2e-39	0.52	0.65	1
03-G07	373	YP_001751632.1	ribulose-phosphate 3-epimerase	Pseudomonas putida W619	224	159	9e-38	0.96	0.98	2
03-G10	587	CAO63346.1	unnamed protein product	Vitis vinifera	312	161	4e-38	0.7	0.83	2
03-G14	634	XP_002265092.1	PREDICTED: hypothetical protein	Vitis vinifera	587	145	3e-33	0.43	0.55	3
03-G24	424	EEF30041.1	protein translocase, putative	Ricinus communis	159	84.3	4e-15	0.86	0.95	1
03-H05	745	XP_002313024.1	predicted protein	Populus trichocarpa	821	421	e-116	0.82	0.87	1
03-H07	699	XP_002305858.1	histone 2	Populus trichocarpa	93	179	3e-43	1	1	2
03-H08	838	EEF27941.1	conserved hypothetical protein	Ricinus communis	422	228	e-99	0.73	0.8	2
03-H09	815	ACJ85349.1	unknown	Medicago truncatula	285	491	e-137	0.92	0.99	3
03-H20	852	XP_002297657.1	predicted protein	Populus trichocarpa	399	190	1e-46	0.91	0.96	1
03-H22	823	EEF36845.1	Cell division control protein, putative	Ricinus communis	530	153	4e-66	0.64	0.73	3
03-I02	797	XP_002297795.1	predicted protein	Populus trichocarpa	772	428	e-118	0.86	0.9	2
03-I06	849	XP_002263524.1	PREDICTED: hypothetical protein	Vitis vinifera	222	163	2e-38	0.46	0.53	3
03-I07	810	EEF36070.1	conserved hypothetical protein	Ricinus communis	385	347	1e-93	0.78	0.88	2
03-I13	637	XP_002320047.1	predicted protein	Populus trichocarpa	466	295	2e-78	0.67	0.79	3
03-I15	219	YP_001202176.1	putative mercuric reductase	Pseudomonas fluorescens SBW25	560	146	8e-34	1	1	-3
03-I16	551	NP_001117219.1	TPK1 (THIAMIN PYROPHOSPHOKINASE1); thiamin diphosphokinase	Arabidopsis thaliana	180	83.2	1e-14	0.66	0.8	3
03-I20	827	EEE67582.1	hypothetical protein OsJ_25113	Oryza sativa Japonica Group	915	242	4e-62	0.45	0.65	-2
03-J11	693	EEE50824.1	hypothetical protein OsJ_31232	Oryza sativa Japonica Group	1594	138	5e-44	0.53	0.72	-2
03-J12	849	CAN62047.1	hypothetical protein	Vitis vinifera	551	362	2e-98	0.67	0.77	2
03-J13	854	XP_002316992.1	predicted protein	Populus trichocarpa	411	160	1e-37	0.42	0.61	1
03-J15	823	AAY54624.1	expansin 3	Nelumbo nucifera	177	205	4e-51	0.89	0.96	1
03-J17	771	EEF43842.1	30S ribosomal protein S19, putative	Ricinus communis	198	121	6e-26	0.75	0.84	1
03-J21	847	CAN81585.1	hypothetical protein	Vitis vinifera	461	405	e-111	0.78	0.84	3
03-K12	416	XP_002322710.1	predicted protein	Populus trichocarpa	776	132	9e-30	0.81	0.87	3
03-K14	789	EEF43153.1	vacuolar protein sorting-associated protein, putative	Ricinuscommunis	4423	414	e-114	0.79	0.88	2
03-K16	415	Q39336.1	Guanine nucleotide-binding protein subunit beta-likeprotein	Brassica napus	327	95.5	2e-18	0.87	0.9	2
03-K18	813	XP_002452705.1	hypothetical protein SORBIDRAFT_04g031060	Sorghum bicolor	459	468	e-130	0.99	0.99	1
03-L05	845	XP_002308514.1	predicted protein	Populus trichocarpa	131	156	2e-36	0.57	0.75	3
03-L12	866	XP_002277969.1	PREDICTED: similar to mRNA capping enzyme family protein	Vitis vinifera	677	472	e-131	0.77	0.86	2
03-L16	885	AAN76362.1	serpin-like protein	Citrus x paradisi	389	408	e-112	0.75	0.85	1
03-L20	768	XP_002263238.1	PREDICTED: hypothetical protein	Vitis vinifera	315	387	e-106	0.79	0.87	2
03-M02	785	XP_002323884.1	predicted protein	Populus trichocarpa	267	350	1e-94	0.7	0.79	3
03-M03	866	XP_002278805.1	PREDICTED: hypothetical protein	Vitis vinifera	364	288	6e-76	0.54	0.64	3
03-M15	856	XP_002320491.1	predicted protein	Populus trichocarpa	188	140	2e-53	0.59	0.75	3
03-M16	413	EEF42794.1	Vacuolar protein sorting protein, putative	Ricinus communis	713	151	2e-35	0.94	0.97	2
03-M18	325	EEF46702.1	fad NAD binding oxidoreductases, putative	Ricinus communis	104	140	6e-32	0.63	0.8	3
03-M21	771	XP_002266692.1	PREDICTED: hypothetical protein	Vitis vinifera	424	256	1e-66	0.78	0.87	1
03-N03	797	EEF38000.1	protein binding protein, putative	Ricinus communis	665	302	3e-80	0.66	0.73	3
03-N05	816	YP_002873974.1	two-component response regulator	Pseudomonas fluorescens SBW25	458	487	e-136	0.93	0.94	2
03-N07	369	YP_002773718.1	hypothetical protein BBR47_42370	Brevibacillus brevis NBRC 100599	406	53.5	7e-06	0.47	0.6	2
03-N14	741	XP_002270347.1	PREDICTED: hypothetical protein	Vitis vinifera	341	238	3e-61	0.68	0.73	3
03-N17	695	XP_002279202.1	PREDICTED: hypothetical protein	Vitis vinifera	713	268	3e-70	0.65	0.74	2
03-N21	738	CAO49821.1	unnamed protein product	Vitis vinifera	347	319	2e-85	0.81	0.89	2
03-O03	820	XP_002283608.1	PREDICTED: hypothetical protein	Vitis vinifera	497	313	9e-84	0.89	0.95	3
03-O06	543	EEF41130.1	heat-shock protein, putative	Ricinus communis	190	194	3e-48	0.62	0.77	1
03-O07	733	XP_002307132.1	predicted protein	Populus trichocarpa	138	268	4e-70	0.96	1	3
03-O23	691	EEH50840.1	predicted protein	Micromonas pusilla CCMP1545	152	170	1e-40	0.92	0.95	-1
03-P03	837	EEF37231.1	homeobox protein, putative	Ricinus communis	209	213	1e-53	0.55	0.64	2
03-P11	599	EEF29477.1	ubiquitin-protein ligase, putative	Ricinus communis	1031	199	1e-49	0.79	0.88	1
03-P18	843	YP_002085617.1	hypothetical protein PA2G_00222	Pseudomonas aeruginosa 2192	482	208	5e-52	0.42	0.55	3
04-A01	847	EEF32550.1	Adaptin ear-binding coat-associated protein, putative	Ricinuscommunis	282	357	1e-96	0.73	0.79	2
04-A03	847	ABV72393.1	coronatine-insensitive 1	Hevea brasiliensis	597	421	e-116	0.74	0.84	1
04-A04	306	XP_002325288.1	DNA methyltransferase	Populus trichocarpa	1549	125	2e-27	0.9	0.95	3
04-A10	862	EEF31012.1	Zeamatin precursor, putative	Ricinus communis	254	434	e-120	0.82	0.88	1
04-A13	867	EEF34184.1	conserved hypothetical protein	Ricinus communis	683	273	2e-71	0.55	0.64	2
04-A16	481	EEF30879.1	ATP synthase f1, gamma subunit, putative	Ricinus communis	326	102	2e-20	0.98	1	2
04-A18	785	XP_002284743.1	PREDICTED: hypothetical protein	Vitis vinifera	216	217	1e-54	0.65	0.77	1
04-A24	803	NP_176500.1	ATRBL2 (Arabidopsis thaliana Rhomboid-like 2); serine-typeendopeptidase	Arabidopsis thaliana	317	162	3e-45	0.68	0.82	1
04-B10	789	ACB42441.1	aquaporin PIP2;4	Gossypium hirsutum	278	391	e-107	0.86	0.9	1
04-B19	254	XP_002436992.1	hypothetical protein SORBIDRAFT_10g014200	Sorghum bicolor	689	53.5	7e-06	0.64	0.79	2
04-C05	596	EEF39607.1	conserved hypothetical protein	Ricinus communis	129	158	3e-37	0.81	0.93	1
04-D04	659	EEF39928.1	adenosine diphosphatase, putative	Ricinus communis	532	99	3e-19	0.55	0.63	2
04-D11	797	XP_002283110.1	PREDICTED: hypothetical protein isoform 1	Vitis vinifera	1761	234	5e-60	0.51	0.67	2
04-D22	462	XP_002299901.1	predicted protein	Populus trichocarpa	398	71.2	3e-11	0.88	0.97	1
04-E14	888	XP_002311649.1	predicted protein	Populus trichocarpa	591	417	e-115	0.73	0.8	2
04-E17	827	XP_002308755.1	predicted protein	Populus trichocarpa	412	384	e-105	0.77	0.86	1
04-E23	813	XP_002305841.1	predicted protein	Populus trichocarpa	348	263	2e-68	0.8	0.92	3
04-F17	825	XP_002262924.1	PREDICTED: hypothetical protein	Vitis vinifera	216	335	4e-90	0.77	0.84	3
04-F20	727	XP_002270340.1	PREDICTED: hypothetical protein	Vitis vinifera	811	325	3e-87	0.91	0.98	2
04-G14	780	EEF51517.1	Protein PPLZ12, putative	Ricinus communis	291	374	e-102	0.89	0.95	1
04-G22	537	XP_002310123.1	predicted protein	Populus trichocarpa	358	246	9e-64	0.9	0.96	2
04-H06	752	EEF42390.1	cinnamoyl-CoA reductase, putative	Ricinus communis	312	292	2e-77	0.72	0.84	2
04-H19	765	EEF52434.1	conserved hypothetical protein	Ricinus communis	131	113	2e-23	0.57	0.67	3
04-H24	658	YP_261393.1	GntR family transcriptional regulator	Pseudomonas fluorescensPf-5	217	254	4e-66	0.7	0.85	-2
04-I03	758	YP_002872385.1	putative gamma-glutamyltranspeptidase precursor	Pseudomonas fluorescens SBW25	574	381	e-104	0.94	0.96	2
04-I14	820	EEF39540.1	GDP-mannose transporter, putative	Ricinus communis	485	190	1e-46	0.62	0.68	2
04-I16	855	CAA40073.1	endopeptidase (EP-C1)	Phaseolus vulgaris	361	469	e-130	0.79	0.89	1
04-I18	349	YP_001750611.1	magnesium transporter	Pseudomonas putida W619	480	219	6e-56	0.95	0.98	-3
04-I22	827	XP_002306858.1	predicted protein	Populus trichocarpa	341	346	1e-93	0.81	0.88	3
04-J04	847	XP_002317490.1	predicted protein	Populus trichocarpa	253	389	e-106	0.82	0.86	2
04-J09	672	XP_002278858.1	PREDICTED: hypothetical protein	Vitis vinifera	866	310	7e-83	0.79	0.91	3
04-J16	841	XP_002273898.1	PREDICTED: hypothetical protein	Vitis vinifera	1197	503	e-140	0.88	0.93	2
04-J22	555	EEF37042.1	receptor protein kinase, putative	Ricinus communis	603	167	3e-40	0.85	0.94	2
04-J23	745	ABK94768.1	unknown	Populus trichocarpa	319	173	1e-41	0.59	0.7	1
04-K05	791	XP_002282343.1	PREDICTED: hypothetical protein	Vitis vinifera	269	233	1e-59	0.67	0.87	3
04-K09	742	EEF34902.1	mitotic checkpoint protein bub3, putative	Ricinus communis	342	385	e-105	0.9	0.96	1
04-K11	767	CAA70100.1	L-lactate dehydrogenase	Solanum lycopersicum	350	365	3e-99	0.9	0.95	1
04-K18	656	NP_188718.1	leucine-rich repeat family protein	Arabidopsis thaliana	365	330	8e-89	0.75	0.86	2
04-L01	815	NP_188629.1	zinc finger (C3HC4-type RING finger) family protein	Arabidopsisthaliana	328	315	4e-84	0.61	0.7	1
04-L08	773	XP_002264896.1	PREDICTED: hypothetical protein	Vitis vinifera	572	400	e-110	0.81	0.89	1
04-L11	319	YP_002871128.1	hypothetical protein PFLU1483	Pseudomonas fluorescens SBW25	408	122	9e-27	0.92	0.98	3
04-L12	681	YP_346185.1	trifunctional transcriptional regulator/prolinedehydrogenase/pyrroline-5-carboxylate dehydrogenase	Pseudomonas fluorescens Pf0-1	1317	424	e-117	0.95	0.97	-2
04-L19	362	XP_002306240.1	predicted protein	Populus trichocarpa	73	102	1e-20	0.67	0.77	3
04-M01	269	CAO43953.1	unnamed protein product	Vitis vinifera	564	76.6	7e-13	0.46	0.6	2
04-M19	543	XP_002299013.1	predicted protein	Populus trichocarpa	68	122	2e-26	0.84	0.93	2
04-N16	688	XP_002276521.1	PREDICTED: hypothetical protein	Vitis vinifera	137	238	5e-61	0.95	0.99	2
04-N18	803	NP_175882.2	unknown protein	Arabidopsis thaliana	206	210	1e-52	0.53	0.71	1
04-N19	518	ABX79380.1	actin-depolymerizing factor	Gossypium barbadense	139	132	1e-29	0.98	1	2
04-N22	672	ACJ84968.1	unknown	Medicago truncatula	132	239	2e-61	0.9	0.93	2
04-N23	362	EEF51501.1	acc synthase, putative	Ricinus communis	530	67.8	3e-10	0.77	0.91	1
04-O06	721	ACP27607.1	FVE	Dimocarpus longan	441	251	2e-89	0.9	0.94	2
04-O09	838	XP_002269030.1	PREDICTED: hypothetical protein	Vitis vinifera	720	149	3e-34	0.67	0.76	2
04-O19	469	XP_002280995.1	PREDICTED: hypothetical protein	Vitis vinifera	1850	77	6e-13	0.36	0.52	3
04-P08	818	XP_002279689.1	PREDICTED: hypothetical protein	Vitis vinifera	558	486	e-136	0.86	0.92	2
04-P12	113	AAD28641.1	sucrose synthase	Gossypium hirsutum	806	67	6e-10	1	1	3
05-A01	786	CAO64380.1	unnamed protein product	Vitis vinifera	1582	348	4e-94	0.66	0.74	2
05-A02	772	EEF50958.1	prohibitin, putative	Ricinus communis	279	353	1e-95	0.76	0.81	3
05-A06	754	XP_002311349.1	predicted protein	Populus trichocarpa	480	305	4e-81	0.77	0.9	1
05-A07	420	XP_002317282.1	predicted protein	Populus trichocarpa	469	163	6e-39	0.77	0.87	1
05-A13	616	ABM05951.1	proline-rich protein	Gossypium hirsutum	111	56.2	2e-06	0.81	0.9	2
05-A14	270	YP_350386.1	chemotaxis sensory transducer, Pas/Pac sensor	Pseudomonasfluorescens Pf0-1	529	111	3e-23	0.71	0.74	3
05-A16	672	XP_002276038.1	PREDICTED: hypothetical protein	Vitis vinifera	182	218	4e-55	0.62	0.74	1
05-B01	848	EEF44870.1	kinesin light chain, putative	Ricinus communis	621	466	e-130	0.8	0.91	2
05-B07	823	YP_001629094.1	thiazole synthase	Bordetella petrii DSM 12804	269	442	e-122	0.92	0.96	-2
05-B08	741	XP_002321182.1	predicted protein	Populus trichocarpa	570	470	e-131	0.88	0.94	1
05-B09	786	XP_002299577.1	predicted protein	Populus trichocarpa	302	177	2e-50	0.82	0.93	1
05-B10	798	EEF52507.1	cytochrome P450, putative	Ricinus communis	518	330	1e-88	0.64	0.78	2
05-B11	749	XP_002274906.1	PREDICTED: hypothetical protein	Vitis vinifera	855	354	4e-96	0.72	0.79	3
05-B12	509	XP_002285919.1	PREDICTED: hypothetical protein	Vitis vinifera	206	62.4	2e-08	0.42	0.49	1
05-B14	766	XP_002312340.1	predicted protein	Populus trichocarpa	878	272	2e-71	0.8	0.9	1
05-B17	847	XP_002267276.1	PREDICTED: hypothetical protein	Vitis vinifera	211	150	2e-34	0.87	0.96	1
05-B18	601	EEF37247.1	hypothetical protein RCOM_0553590	Ricinus communis	490	113	1e-23	0.71	0.82	1
05-C01	836	XP_002313079.1	predicted protein	Populus trichocarpa	204	83.6	8e-26	0.6	0.76	1
05-C02	566	XP_002268691.1	PREDICTED: hypothetical protein	Vitis vinifera	164	57.8	5e-07	0.36	0.46	1
05-C03	841	EEF31539.1	conserved hypothetical protein	Ricinus communis	307	334	5e-90	0.79	0.88	2
05-C05	808	XP_002320958.1	predicted protein	Populus trichocarpa	336	269	3e-70	0.81	0.89	3
05-C07	736	CAO47305.1	unnamed protein product	Vitis vinifera	433	353	1e-95	0.7	0.83	2
05-C17	769	XP_002279882.1	PREDICTED: hypothetical protein	Vitis vinifera	361	376	e-102	0.9	0.94	3
05-C19	527	EEF33134.1	ER lumen protein retaining receptor, putative	Ricinus communis	272	188	2e-46	0.97	1	1
05-C21	724	XP_002281235.1	PREDICTED: hypothetical protein	Vitis vinifera	660	188	6e-96	0.8	0.89	2
05-C24	807	EEF52922.1	transcription factor, putative	Ricinus communis	449	381	e-104	0.71	0.82	2
05-D13	502	AAC05642.1	unknown	Pseudomonas marginalis pv. alfalfae	365	319	5e-86	0.97	0.99	2
05-D14	593	EEF40069.1	COR413-PM2, putative	Ricinus communis	207	98.2	1e-33	0.93	0.97	3
05-D15	812	XP_002283301.1	PREDICTED: hypothetical protein	Vitis vinifera	382	194	8e-48	0.5	0.6	2
05-D17	779	XP_002282806.1	PREDICTED: hypothetical protein	Vitis vinifera	557	232	3e-59	0.59	0.68	2
05-D23	831	XP_002263864.1	PREDICTED: hypothetical protein	Vitis vinifera	374	471	e-131	0.85	0.93	3
05-D24	691	XP_001508660.1	PREDICTED: similar to histone protein Hist2h3c1	Ornithorhynchusanatinus	182	258	3e-67	0.9	0.93	3
05-E06	805	EEF45384.1	vacuole membrane protein, putative	Ricinus communis	427	390	e-107	0.78	0.89	3
05-E07	821	EEF50700.1	amino acid binding protein, putative	Ricinus communis	443	304	8e-81	0.87	0.93	2
05-E08	750	EEF42191.1	Protein PPLZ12, putative	Ricinus communis	285	379	e-103	0.9	0.95	2
05-E18	770	ABR15094.1	ATP citrate lyase alpha subunit	Glycyrrhiza uralensis	608	419	e-115	0.91	0.93	1
05-E19	810	XP_002314240.1	predicted protein	Populus trichocarpa	439	445	e-123	0.9	0.91	3
05-E22	823	XP_002297945.1	predicted protein	Populus trichocarpa	1041	389	e-106	0.67	0.81	2
05-E23	613	XP_002316911.1	predicted protein	Populus trichocarpa	255	211	3e-53	0.82	0.93	2
05-F08	236	EEF46838.1	Eukaryotic translation initiation factor 3 subunit, putative	Ricinus communis	720	151	2e-35	0.89	0.96	2
05-F16	512	NP_884651.1	Maf-like protein	Bordetella parapertussis 12822	207	180	5e-44	0.76	0.85	-1
05-F18	838	ABX10440.1	3-ketoacyl-CoA synthase 10	Gossypium hirsutum	531	424	e-131	0.98	0.99	1
05-G07	845	NP_886542.1	putative extracellular solute-binding protein	Bordetellaparapertussis 12822	528	492	e-137	0.92	0.97	2
05-G09	842	XP_002278314.1	PREDICTED: hypothetical protein	Vitis vinifera	474	424	e-117	0.71	0.82	1
05-G12	844	EEF43722.1	conserved hypothetical protein	Ricinus communis	368	468	e-130	0.81	0.89	3
05-G13	247	YP_002874305.1	putative two-component regulatory system, sensor kinase protein	Pseudomonas fluorescens SBW25	390	132	1e-29	0.84	0.89	1
05-G18	858	ABA54871.1	putative chorismate mutase	Fagus sylvatica	323	324	8e-87	0.62	0.72	2
05-G20	684	XP_002319359.1	hypothetical protein POPTRDRAFT_243090	Populus trichocarpa	237	185	3e-45	0.91	0.93	1
05-G22	860	EEF29571.1	nfrkb, putative	Ricinus communis	1410	538	e-151	0.91	0.95	2
05-H03	752	YP_274711.1	hypothetical protein PSPPH_2515	Pseudomonas syringae pv.phaseolicola 1448A	1164	122	3e-26	0.37	0.55	2
05-H10	348	EEF40036.1	Polyneuridine-aldehyde esterase precursor, putative	Ricinuscommunis	260	99.8	8e-20	0.66	0.87	3
05-I02	859	AAY43795.1	Fb27	Gossypium hirsutum	194	348	5e-94	0.93	0.93	2
05-I04	847	XP_002269733.1	PREDICTED: hypothetical protein isoform 2	Vitis vinifera	480	496	e-138	0.95	0.98	1
05-I05	549	BAC23035.1	26S proteasome AAA-ATPase subunit RPT4a	Solanum tuberosum	398	77.8	5e-13	0.97	0.97	2
05-I09	839	EEF51030.1	conserved hypothetical protein	Ricinus communis	306	245	4e-63	0.78	0.85	2
05-I10	819	YP_001633620.1	tRNA modification GTPase TrmE	Bordetella petrii DSM 12804	452	260	9e-68	0.75	0.79	3
05-I11	688	EEF47971.1	cation-transporting atpase plant, putative	Ricinus communis	1017	356	9e-97	0.76	0.87	2
05-I22	534	EEF47055.1	60S acidic ribosomal protein P1, putative	Ricinus communis	113	105	2e-21	0.5	0.57	1
05-J01	872	EEF46802.1	WRKY transcription factor, putative	Ricinus communis	321	287	8e-76	0.58	0.67	2
05-J02	885	EEF51492.1	dead box ATP-dependent RNA helicase, putative	Ricinus communis	690	248	6e-64	0.85	0.93	2
05-J06	822	EEF39970.1	xenotropic and polytropic murine leukemia virus receptor pho1,putative	Ricinus communis	779	305	3e-81	0.59	0.72	2
05-J10	852	EEF52779.1	ring finger protein, putative	Ricinus communis	175	199	4e-49	0.63	0.79	3
05-J12	885	EEF29635.1	Glycosyltransferase QUASIMODO1, putative	Ricinus communis	566	323	1e-86	0.81	0.85	3
05-K02	820	XP_002302075.1	predicted protein	Populus trichocarpa	237	311	5e-83	0.71	0.78	3
05-K04	936	XP_002328996.1	predicted protein	Populus trichocarpa	411	509	e-142	0.89	0.95	2
05-K12	423	EEF41275.1	serine/threonine protein kinase, putative	Ricinus communis	1325	105	2e-21	0.77	0.87	1
05-K19	889	ACJ85114.1	unknown	Medicago truncatula	280	179	4e-43	0.67	0.86	2
05-K20	685	XP_002309175.1	predicted protein	Populus trichocarpa	477	225	2e-57	0.68	0.81	3
05-L08	906	XP_002285526.1	PREDICTED: hypothetical protein isoform 1	Vitis vinifera	638	424	e-117	0.75	0.87	2
05-L11	737	O49856.1	Ferredoxin-thioredoxin reductase catalytic chain,chloroplastic	Glycine max	144	132	3e-47	0.77	0.88	2
05-L14	284	XP_002270673.1	PREDICTED: hypothetical protein	Vitis vinifera	505	72	2e-11	0.73	0.8	2
05-L21	801	NP_190989.1	ribosomal protein L17 family protein	Arabidopsis thaliana	211	299	2e-79	0.73	0.81	3
05-M01	748	CAN70332.1	hypothetical protein	Vitis vinifera	242	253	2e-65	0.63	0.78	1
05-M06	748	ACN54323.1	NADPH:cytochrome P450 reductase	Gossypium hirsutum	693	360	7e-98	0.96	0.97	3
05-M07	790	XP_002299266.1	predicted protein	Populus trichocarpa	251	265	4e-69	0.61	0.78	3
05-M19	835	AAF21428.2	salt-induced AAA-Type ATPase	Mesembryanthemum crystallinum	434	309	2e-82	0.79	0.81	2
05-M23	902	XP_002281041.1	PREDICTED: hypothetical protein	Vitis vinifera	438	292	3e-77	0.59	0.68	1
05-N06	680	ABY61050.1	5-enolpyruvylshikimate-3-phosphate synthase	Gossypium hirsutum	521	360	5e-98	0.82	0.82	1
05-N08	439	EEF36913.1	conserved hypothetical protein	Ricinus communis	84	107	5e-22	0.8	0.93	1
05-N14	671	ABK21138.1	unknown	Picea sitchensis	108	135	4e-30	0.93	1	2
05-N20	747	EEF37974.1	transcription factor, putative	Ricinus communis	259	291	5e-77	0.66	0.74	3
05-N21	831	XP_002272771.1	PREDICTED: hypothetical protein	Vitis vinifera	1324	201	9e-50	0.46	0.59	2
05-O02	885	EEF45043.1	Serine/threonine-protein kinase SAPK3, putative	Ricinus communis	336	528	e-148	0.88	0.94	2
05-O04	233	YP_002870243.1	hypothetical protein PFLU0573	Pseudomonas fluorescens SBW25	337	148	2e-34	0.98	1	2
05-O07	721	AAM76222.1	putative IAA-responsive protein 9	Gossypium hirsutum	122	207	1e-51	1	1	3
05-O12	590	XP_002273606.1	PREDICTED: hypothetical protein	Vitis vinifera	992	298	2e-79	0.79	0.9	1
05-O13	802	EEF36705.1	conserved hypothetical protein	Ricinus communis	1050	73.9	4e-16	0.8	0.82	1
05-O17	530	ZP_02357675.1	carbon-phosphorus lyase complex subunit	Burkholderia oklahomensisEO147	212	169	1e-40	0.51	0.58	-2
05-O19	351	XP_002451520.1	hypothetical protein SORBIDRAFT_04g003180	Sorghum bicolor	307	85.5	2e-15	0.88	0.95	1
05-O20	781	XP_002326106.1	predicted protein	Populus trichocarpa	324	269	2e-70	0.58	0.69	2
05-O22	575	AAT64032.1	putative leucine-rich repeat transmembrane protein; putativeprotein kinase	Gossypium hirsutum	618	227	4e-90	0.97	0.99	3
05-P01	798	XP_002314671.1	predicted protein	Populus trichocarpa	261	423	e-116	0.93	0.97	3
05-P02	909	CAE46936.1	hasR	Serratia marcescens	899	178	7e-43	0.36	0.49	3
05-P05	882	YP_002871747.1	hypothetical protein PFLU2131	Pseudomonas fluorescens SBW25	64	107	2e-21	0.89	0.94	-3
05-P08	760	ACJ84329.1	unknown	Medicago truncatula	309	286	1e-75	0.71	0.81	3
05-P10	794	XP_002264497.1	PREDICTED: hypothetical protein	Vitis vinifera	253	290	8e-77	0.62	0.71	3
05-P23	880	EEF47737.1	pentatricopeptide repeat-containing protein, putative	Ricinuscommunis	569	384	e-105	0.64	0.79	3
06-A01	894	XP_002282774.1	PREDICTED: similar to glucose-6-phosphate isomerase	Vitis vinifera	568	517	e-145	0.87	0.94	1
06-A02	860	AAV73918.1	calmodulin binding heat shock protein	Gossypium hirsutum	457	521	e-146	0.92	0.97	2
06-A10	840	EEF43570.1	Thioredoxin domain-containing protein, putative	Ricinus communis	209	339	2e-91	0.85	0.94	1
06-A18	741	XP_002307913.1	predicted protein	Populus trichocarpa	514	418	e-115	0.84	0.91	2
06-A22	510	XP_002313489.1	predicted protein	Populus trichocarpa	173	89.7	9e-17	0.57	0.63	3
06-B02	632	EEF42352.1	AMP dependent CoA ligase, putative	Ricinus communis	573	348	3e-94	0.83	0.87	1
06-B07	568	EEF52544.1	conserved hypothetical protein	Ricinus communis	651	198	3e-49	0.86	0.94	3
06-B08	865	XP_002278166.1	PREDICTED: hypothetical protein	Vitis vinifera	662	328	5e-88	0.61	0.78	1
06-B11	831	XP_002300771.1	predicted protein	Populus trichocarpa	694	363	8e-99	0.72	0.82	1
06-B15	293	XP_002321654.1	predicted protein	Populus trichocarpa	362	75.9	1e-12	0.77	0.86	2
06-B16	129	YP_002869924.1	putative monooxygenase	Pseudomonas fluorescens SBW25	450	79.3	1e-13	0.95	0.95	-1
06-B22	665	EEF38109.1	ATP-binding cassette transporter, putative	Ricinus communis	456	337	5e-91	0.74	0.82	2
06-B23	817	EEF44477.1	conserved hypothetical protein	Ricinus communis	317	406	e-111	0.8	0.86	3
06-C03	726	EEF42441.1	leucine-rich repeat-containing protein, putative	Ricinus communis	528	142	4e-32	0.67	0.75	1
06-D02	673	EEF51398.1	Remorin, putative	Ricinus communis	182	170	9e-41	0.52	0.61	1
06-D08	386	XP_002265204.1	PREDICTED: hypothetical protein	Vitis vinifera	174	160	5e-38	0.74	0.83	2
06-D09	278	EEF30533.1	conserved hypothetical protein	Ricinus communis	321	173	6e-42	0.83	0.89	1
06-E08	466	CAQ58628.1	Putative 2-3 biphosphoglycerate independant phosphoglycerate mutase	Vitis vinifera	559	93.2	8e-18	0.66	0.72	1
06-E10	225	ZP_03575052.1	AMP-dependent synthetase and ligase	Burkholderia multivoransCGD2M	539	89.4	1e-16	0.54	0.71	-2
06-E14	635	YP_349372.1	secretion protein HlyD	Pseudomonas fluorescens Pf0-1	400	369	e-100	0.9	0.93	-1
06-E21	731	ABR68794.1	aquaporin PIP1-2	Gossypium hirsutum	287	313	8e-84	0.99	0.99	1
06-F02	864	XP_002308570.1	predicted protein	Populus trichocarpa	521	373	e-101	0.74	0.79	1
06-F03	802	XP_002279809.1	PREDICTED: hypothetical protein	Vitis vinifera	491	103	1e-20	0.34	0.44	1
06-F22	330	XP_002266562.1	PREDICTED: hypothetical protein	Vitis vinifera	480	56.2	1e-06	0.82	0.92	3
06-F24	447	EEF52581.1	acyltransferase, putative	Ricinus communis	502	93.2	8e-18	0.93	0.95	3
06-G05	833	XP_002316296.1	predicted protein	Populus trichocarpa	610	342	2e-92	0.72	0.82	2
06-G07	574	XP_002315901.1	predicted protein	Populus trichocarpa	255	184	4e-45	0.69	0.74	3
06-G10	564	XP_002270339.1	PREDICTED: hypothetical protein	Vitis vinifera	116	119	1e-25	0.72	0.77	2
06-G14	454	XP_002271414.1	PREDICTED: hypothetical protein	Vitis vinifera	423	72.4	1e-11	0.88	0.97	1
06-G16	870	EEF33914.1	conserved hypothetical protein	Ricinus communis	500	485	e-135	0.81	0.87	3
06-G18	409	EEF50636.1	F-box and wd40 domain protein, putative	Ricinus communis	1204	238	1e-61	0.85	0.91	1
06-H03	787	EEF30272.1	suppressor of actin, putative	Ricinus communis	585	334	e-116	0.8	0.91	1
06-H04	577	AAK73021.1	ceramide glucosyltransferase	Gossypium arboreum	520	392	e-107	0.99	0.99	3
06-H06	420	EEF38650.1	transferase, putative	Ricinus communis	461	257	3e-67	0.84	0.92	2
06-H09	625	YP_001889996.1	X-Pro dipeptidyl-peptidase domain protein	Burkholderiaphytofirmans PsJN	647	169	2e-40	0.71	0.79	-3
06-H12	473	YP_002870800.1	glycerol-3-phosphate regulon repressor	Pseudomonas fluorescensSBW25	251	266	5e-70	0.9	0.92	-2
06-H13	614	NP_001048495.1	Os02g0814700	Oryza sativa (japonica cultivar-group)	140	282	2e-74	0.98	1	1
06-H16	733	XP_002331190.1	predicted protein	Populus trichocarpa	1763	247	9e-64	0.64	0.76	1
06-H19	354	EEF46251.1	conserved hypothetical protein	Ricinus communis	140	101	2e-20	0.81	0.9	2
06-H23	769	XP_002273792.1	PREDICTED: hypothetical protein	Vitis vinifera	722	305	4e-81	0.7	0.77	3
06-I01	818	EEF49976.1	transcription factor, putative	Ricinus communis	207	162	3e-38	0.49	0.6	2
06-I12	849	XP_002278760.1	PREDICTED: hypothetical protein	Vitis vinifera	351	241	5e-62	0.53	0.68	2
06-I15	799	EEF45550.1	conserved hypothetical protein	Ricinus communis	128	102	4e-20	0.48	0.56	1
06-I17	584	XP_002320802.1	cytochrome P450	Populus trichocarpa	565	165	2e-39	0.75	0.88	1
06-J05	804	XP_002282538.1	PREDICTED: hypothetical protein	Vitis vinifera	644	327	8e-88	0.63	0.66	1
06-J10	228	ABU75304.1	chloroplast PPF-1	Poncirus trifoliata	452	79	2e-13	0.75	0.81	1
06-J18	450	ACF74333.1	putative L24 ribosomal protein	Arachis hypogaea	146	187	3e-46	0.76	0.78	2
06-J23	360	XP_002488965.1	hypothetical protein SORBIDRAFT_1138s002030	Sorghum bicolor	98	126	8e-28	0.82	0.85	3
06-K01	846	CAO24165.1	unnamed protein product	Vitis vinifera	472	347	1e-93	0.71	0.82	1
06-K11	749	XP_002266312.1	PREDICTED: hypothetical protein	Vitis vinifera	577	349	2e-94	0.77	0.86	3
06-K12	736	EEF31171.1	EH-domain-containing protein, putative	Ricinus communis	550	335	2e-90	0.68	0.76	3
06-K14	417	EEF45303.1	hypothetical protein RCOM_0912170	Ricinus communis	1604	99	1e-19	0.56	0.67	1
06-L08	340	CAN67869.1	hypothetical protein	Vitis vinifera	505	147	4e-34	0.81	0.91	1
06-L12	726	XP_002309810.1	predicted protein	Populus trichocarpa	988	160	8e-38	0.66	0.8	2
06-L13	416	XP_002264393.1	PREDICTED: hypothetical protein	Vitis vinifera	431	232	1e-59	0.81	0.87	3
06-L19	787	EEF37080.1	Peroxidase 73 precursor, putative	Ricinus communis	334	437	e-121	0.88	0.93	1
06-M04	686	EEF28932.1	conserved hypothetical protein	Ricinus communis	392	200	1e-49	0.61	0.7	1
06-M06	431	YP_001631981.1	putative response regulator	Bordetella petrii DSM 12804	465	149	1e-34	0.79	0.89	2
06-M11	150	YP_001631807.1	outer membrane porin protein precursor	Bordetella petrii DSM12804	369	55.1	2e-06	0.83	0.87	-3
06-N02	578	ABN05685.1	RNA-directed DNA polymerase (Reverse transcriptase)	Medicago truncatula	1223	77	9e-13	0.3	0.51	-1
06-N05	166	ABV26712.1	5-enolpyruvylshikimate-3-phosphate synthase	uncultured bacterium	444	108	2e-22	0.94	0.98	3
06-N06	804	EEF43629.1	phosphoprotein phosphatase, putative	Ricinus communis	612	461	e-128	0.83	0.9	2
06-O05	799	NP_195639.2	phenylalanyl-tRNA synthetase, putative / phenylalanine--tRNAligase, putative	Arabidopsis thaliana	485	480	e-134	0.91	0.96	2
06-O11	810	EEF46792.1	Coatomer subunit beta, putative	Ricinus communis	819	291	4e-77	0.94	0.98	1
06-P03	796	XP_002322237.1	predicted protein	Populus trichocarpa	248	324	5e-87	0.88	0.95	2
06-P19	321	EEF39291.1	60S ribosomal protein L18, putative	Ricinus communis	187	196	9e-49	0.93	0.99	1
06-P24	395	XP_002276824.1	PREDICTED: hypothetical protein	Vitis vinifera	981	98.2	2e-19	0.84	0.91	3
06-c08	783	AAY43795.1	Fb27	Gossypium hirsutum	194	346	1e-93	0.92	0.92	1
06-c11	471	EEF30790.1	Cofactor required for Sp1 transcriptional activation subunit,putative	Ricinus communis	168	132	9e-30	0.78	0.85	3
06-c12	812	EEF48133.1	Charged multivesicular body protein 4b, putative	Ricinus communis	218	209	2e-52	0.75	0.77	3
06-c14	775	XP_002301087.1	predicted protein	Populus trichocarpa	925	404	e-111	0.79	0.85	2
06-c24	750	EEF35601.1	conserved hypothetical protein	Ricinus communis	683	337	5e-91	0.67	0.8	1
07-A05	848	XP_002324510.1	predicted protein	Populus trichocarpa	431	422	e-116	0.91	0.97	3
07-A07	178	YP_002873339.1	hypothetical protein PFLU3785	Pseudomonas fluorescens SBW25	223	89.4	1e-16	0.97	0.97	2
07-A12	870	XP_002320420.1	predicted protein	Populus trichocarpa	912	260	1e-67	0.65	0.79	2
07-A13	437	AAD51623.1	seed maturation protein PM35	Glycine max	95	107	3e-22	0.68	0.84	1
07-A14	707	XP_002306265.1	predicted protein	Populus trichocarpa	548	240	8e-62	0.55	0.62	2
07-A16	841	CAA87084.1	acetohydroxyacid synthase	Gossypium hirsutum	659	549	e-154	1	1	1
07-A22	859	CAO38953.1	unnamed protein product	Vitis vinifera	399	304	8e-81	0.59	0.63	3
07-B08	528	EEF48278.1	casein kinase, putative	Ricinus communis	664	152	1e-35	0.56	0.69	1
07-B13	550	EAZ20864.1	hypothetical protein OsJ_36503	Oryza sativa Japonica Group	160	94.4	5e-18	0.95	0.95	2
07-B14	801	EEF31378.1	ADP-ribosylation factor, putative	Ricinus communis	184	324	5e-87	0.92	0.98	1
07-B19	695	XP_002262994.1	PREDICTED: hypothetical protein	Vitis vinifera	126	241	3e-62	0.88	0.96	1
07-B22	866	ABU53026.1	chloroplast acetyl-CoA carboxylase carboxyltransferase alpha subunit	Gossypium hirsutum	760	234	6e-60	0.91	0.91	3
07-C11	855	XP_002282473.1	PREDICTED: hypothetical protein	Vitis vinifera	555	354	5e-96	0.69	0.76	2
07-C16	872	EEF34340.1	ubiquitin-associated uba/ubx domain-containing protein, putative	Ricinus communis	389	274	9e-72	0.74	0.82	1
07-C21	439	XP_002276745.1	PREDICTED: hypothetical protein	Vitis vinifera	648	74.7	3e-12	0.83	0.88	3
07-D06	661	EEF49961.1	conserved hypothetical protein	Ricinus communis	264	268	3e-70	0.72	0.82	2
07-D17	843	XP_002318311.1	predicted protein	Populus trichocarpa	316	291	4e-77	0.79	0.86	3
07-D20	781	XP_002282116.1	PREDICTED: hypothetical protein	Vitis vinifera	331	409	e-112	0.76	0.87	3
07-D22	370	ZP_04589693.1	ABC transporter	Pseudomonas syringae pv. oryzae str. 1_6	215	205	1e-51	0.84	0.88	3
07-E02	675	XP_002265811.1	PREDICTED: hypothetical protein	Vitis vinifera	800	311	3e-83	0.94	0.99	3
07-E03	872	XP_002273700.1	PREDICTED: hypothetical protein	Vitis vinifera	209	296	2e-78	0.7	0.8	3
07-E05	844	EEC79285.1	hypothetical protein OsI_20087	Oryza sativa Indica Group	216	71.6	9e-11	0.34	0.52	-1
07-E09	843	YP_298630.1	cytochrome c oxidase, subunit II:cytochrome c, class I:cytochrome Coxidase subunit II, transmembrane region	Ralstoniaeutropha JMP134	316	165	6e-39	0.5	0.68	-1
07-E11	627	ABA46758.1	unknown	Solanum tuberosum	130	260	5e-68	0.99	1	3
07-E17	848	XP_002279978.1	PREDICTED: hypothetical protein	Vitis vinifera	526	449	e-124	0.81	0.9	1
07-E19	551	EEF41529.1	alpha-soluble nsf attachment protein, putative	Ricinus communis	289	169	1e-40	0.88	0.97	2
07-F01	857	EEF47057.1	conserved hypothetical protein	Ricinus communis	1899	400	e-110	0.69	0.84	3
07-F10	828	XP_002304373.1	predicted protein	Populus trichocarpa	453	481	e-134	0.83	0.92	1
07-G02	820	XP_002312708.1	porin/voltage-dependent anion-selective channel protein	Populustrichocarpa	276	421	e-116	0.77	0.85	1
07-G09	292	NP_564755.1	radical SAM domain-containing protein	Arabidopsis thaliana	458	147	7e-36	0.9	0.95	2
07-G11	652	AAQ84324.1	fiber protein Fb32	Gossypium barbadense	228	261	5e-68	0.85	0.86	1
07-G15	875	YP_002874077.1	hypothetical protein PFLU4550	Pseudomonas fluorescens SBW25	273	202	4e-50	0.57	0.6	-3
07-G16	891	XP_002300416.1	predicted protein	Populus trichocarpa	413	111	8e-23	0.4	0.52	2
07-G19	779	XP_002302714.1	predicted protein	Populus trichocarpa	342	94	1e-17	0.81	0.89	2
07-G23	851	EEF43459.1	RNA-binding protein, putative	Ricinus communis	379	350	7e-95	0.86	0.93	1
07-H06	847	XP_002316010.1	cytochrome P450	Populus trichocarpa	515	368	e-100	0.6	0.81	1
07-H14	500	EEF45450.1	conserved hypothetical protein	Ricinus communis	86	112	1e-23	0.69	0.79	2
07-H16	518	YP_002871498.1	putative LysR-family regulatory protein	Pseudomonas fluorescensSBW25	327	318	2e-85	0.88	0.92	3
07-H23	827	ABU49726.1	ferritin	Solanum tuberosum	263	306	2e-81	0.7	0.77	1
07-I02	645	XP_002302153.1	predicted protein	Populus trichocarpa	154	266	1e-69	0.89	0.89	2
07-I05	729	XP_002309627.1	predicted protein	Populus trichocarpa	437	106	2e-21	0.41	0.53	3
07-I20	840	AAM62970.1	shaggy related protein kinase ASK-GAMMA	Arabidopsis thaliana	409	473	e-131	0.94	0.97	1
07-J04	887	XP_002307594.1	predicted protein	Populus trichocarpa	440	418	e-115	0.76	0.85	3
07-J05	826	EEF42327.1	cell division cycle, putative	Ricinus communis	447	414	e-114	0.92	0.95	3
07-J10	862	EEF37853.1	conserved hypothetical protein	Ricinus communis	484	418	e-115	0.83	0.9	1
07-J11	626	ABK92961.1	unknown	Populus trichocarpa	384	78.2	5e-13	0.45	0.56	2
07-J18	596	AAM77358.1	maturase	Gossypium trilobum	504	403	e-111	0.99	0.99	1
07-K01	848	EEF35044.1	conserved hypothetical protein	Ricinus communis	3206	358	4e-97	0.82	0.9	2
07-K02	771	XP_002281756.1	PREDICTED: hypothetical protein	Vitis vinifera	301	183	2e-44	0.83	0.85	3
07-K04	361	YP_784125.1	hypothetical protein PehoCp099	Pelargonium x hortorum	188	143	6e-33	0.89	0.96	1
07-K10	874	XP_002267920.1	PREDICTED: hypothetical protein	Vitis vinifera	463	432	e-119	0.84	0.92	2
07-K12	778	EEF32541.1	60S ribosomal protein L14, putative	Ricinus communis	133	243	1e-62	0.93	0.95	1
07-K15	293	EEF32491.1	conserved hypothetical protein	Ricinus communis	231	57	6e-07	0.75	0.81	1
07-K18	438	CAO21709.1	unnamed protein product	Vitis vinifera	151	177	2e-44	0.9	0.91	1
07-L05	642	XP_002284357.1	PREDICTED: hypothetical protein	Vitis vinifera	146	171	5e-41	1	1	3
07-L09	671	EEF34491.1	conserved hypothetical protein	Ricinus communis	868	393	e-108	0.84	0.89	1
07-L10	897	EEF37036.1	ATP-citrate synthase, putative	Ricinus communis	423	529	e-148	0.89	0.94	3
07-L14	877	XP_002280677.1	PREDICTED: hypothetical protein	Vitis vinifera	517	336	2e-90	0.74	0.85	1
07-L15	395	YP_262446.1	heme transport protein, putative	Pseudomonas fluorescens Pf-5	901	203	5e-51	0.75	0.83	-1
07-L16	883	AAO61854.1	glutathione S-transferase U1	Malva pusilla	219	346	2e-93	0.75	0.85	2
07-L17	905	XP_002318273.1	predicted protein	Populus trichocarpa	345	255	5e-66	0.58	0.69	3
07-L19	785	EEF37107.1	Histone H1.1, putative	Ricinus communis	303	302	2e-80	0.64	0.78	2
07-L24	572	EEF33564.1	60S ribosomal protein L14, putative	Ricinus communis	134	225	2e-57	0.9	0.94	1
07-M05	862	EEF33442.1	zinc finger protein, putative	Ricinus communis	456	466	e-129	0.71	0.83	1
07-M06	900	YP_002869813.1	putative methyl-accepting chemotaxis protein	Pseudomonas fluorescens SBW25	626	502	e-140	0.85	0.89	3
07-M10	884	EEF46210.1	Eukaryotic translation initiation factor 3 subunit, putative	Ricinus communis	236	416	e-114	0.87	0.93	1
07-M11	793	XP_002266630.1	PREDICTED: hypothetical protein	Vitis vinifera	388	442	e-122	0.92	0.97	2
07-M12	851	XP_002313206.1	predicted protein	Populus trichocarpa	323	314	8e-84	0.89	0.94	1
07-M17	907	EEF31905.1	succinate dehydrogenase, putative	Ricinus communis	622	496	e-138	0.96	0.99	1
07-M18	157	NP_888550.1	adenylate kinase	Bordetella bronchiseptica RB50	218	90.1	7e-17	0.83	0.89	-1
07-N02	872	NP_889395.1	RNA polymerase factor sigma-54	Bordetella bronchiseptica RB50	482	276	2e-72	0.54	0.62	-2
07-N03	306	XP_002280632.1	PREDICTED: hypothetical protein	Vitis vinifera	156	80.1	7e-14	0.92	0.95	2
07-N04	792	ZP_04421400.1	arabinose efflux permease family protein	Sulfurospirillumdeleyianum DSM 6946	394	75.9	4e-12	0.37	0.55	2
07-N07	802	Q39817.1	CALX_SOYBN RecName: Full=Calnexin homolog; Flags: Precursor	Glycine max	546	431	e-119	0.75	0.86	3
07-N15	246	YP_001629046.1	hypothetical protein Bpet0443	Bordetella petrii DSM 12804	338	140	5e-32	0.85	0.91	3
07-N17	663	ACJ85468.1	unknown	Medicago truncatula	278	309	2e-82	0.78	0.88	1
07-N20	757	EEF29519.1	protein kinase atn1, putative	Ricinus communis	367	134	7e-30	0.75	0.89	3
07-N23	778	EEF39066.1	dopamine beta-monooxygenase, putative	Ricinus communis	422	314	5e-84	0.62	0.72	3
07-N24	840	EEF52308.1	conserved hypothetical protein	Ricinus communis	351	207	1e-51	0.57	0.72	2
07-O03	672	EEF33366.1	conserved hypothetical protein	Ricinus communis	468	270	8e-71	0.6	0.72	3
07-O08	849	EEF39742.1	protein with unknown function	Ricinus communis	443	450	e-125	0.85	0.93	3
07-O15	757	XP_002301299.1	predicted protein	Populus trichocarpa	201	272	2e-71	0.81	0.89	3
07-O18	782	ABA81853.1	NADH:ubiquinone oxidoreductase-like	Solanum tuberosum	229	318	5e-85	0.9	0.91	3
07-P06	609	EEF38142.1	Speckle-type POZ protein, putative	Ricinus communis	408	192	1e-47	0.7	0.78	2
07-P09	703	EEF47193.1	conserved hypothetical protein	Ricinus communis	658	247	6e-64	0.57	0.71	2
07-P10	853	AAK60517.1	P450 monooxygenase	Gossypium arboreum	536	350	1e-94	0.6	0.77	2
07-P12	662	XP_002301850.1	predicted protein	Populus trichocarpa	108	124	5e-27	0.64	0.76	2
07-P16	812	XP_002316764.1	predicted protein	Populus trichocarpa	217	307	9e-82	0.74	0.83	1
08-A02	859	ACJ86227.1	unknown	Medicago truncatula	171	61.2	5e-17	0.38	0.54	2
08-A03	713	XP_002285549.1	PREDICTED: hypothetical protein	Vitis vinifera	357	380	e-104	0.8	0.89	3
08-A06	794	XP_002297785.1	predicted protein	Populus trichocarpa	858	325	4e-87	0.6	0.78	1
08-A07	624	CAN79495.1	hypothetical protein	Vitis vinifera	338	138	3e-31	0.43	0.51	3
08-A11	821	ACE80963.1	putative allergen Pru p 2.04	Prunus dulcis x Prunus persica	330	402	e-110	0.77	0.85	2
08-A13	851	XP_002284844.1	PREDICTED: hypothetical protein	Vitis vinifera	476	266	1e-69	0.41	0.59	3
08-A16	707	ABK42077.1	ubiquitin extension protein	Capsicum annuum	179	266	1e-69	0.83	0.84	1
08-A18	768	XP_002314803.1	sulfate/bicarbonate/oxalate exchanger and transporter sat-1	Populustrichocarpa	652	331	5e-89	0.75	0.89	1
08-A21	746	EEF40354.1	synovial sarcoma associated ss18 protein, putative	Ricinuscommunis	219	197	1e-48	0.54	0.57	2
08-B01	802	EEF50060.1	transferase, transferring glycosyl groups, putative	Ricinuscommunis	597	430	e-119	0.73	0.85	2
08-B02	455	XP_002307661.1	predicted protein	Populus trichocarpa	201	65.9	1e-09	0.46	0.55	-2
08-B20	837	XP_002263664.1	PREDICTED: hypothetical protein	Vitis vinifera	458	451	e-125	0.78	0.91	1
08-B21	879	XP_002311534.1	predicted protein	Populus trichocarpa	375	397	e-109	0.77	0.85	3
08-B23	614	AAC25423.1	calcium-dependent protein kinase	Nicotiana tabacum	540	259	2e-67	0.87	0.95	3
08-C03	810	ABK96222.1	unknown	Populus trichocarpa x Populus deltoides	338	408	e-112	0.82	0.89	3
08-C06	593	XP_002279025.1	PREDICTED: hypothetical protein	Vitis vinifera	142	285	1e-75	0.98	1	3
08-C14	594	XP_002271506.1	PREDICTED: hypothetical protein	Vitis vinifera	138	167	7e-40	0.7	0.79	2
08-D03	597	CAO64387.1	unnamed protein product	Vitis vinifera	102	122	2e-26	0.66	0.8	3
08-D11	880	XP_002280601.1	PREDICTED: hypothetical protein	Vitis vinifera	417	278	7e-73	0.68	0.79	2
08-D13	836	XP_002298027.1	predicted protein	Populus trichocarpa	453	268	4e-70	0.58	0.63	3
08-D14	399	XP_002281426.1	PREDICTED: hypothetical protein	Vitis vinifera	946	55.1	2e-06	0.48	0.52	2
08-D18	358	AAG39456.1	transposase subunit	Pseudomonas alcaligenes	150	130	4e-29	0.8	0.83	1
08-D22	774	XP_002276533.1	PREDICTED: hypothetical protein	Vitis vinifera	567	404	e-111	0.79	0.9	2
08-D23	789	XP_002303094.1	predicted protein	Populus trichocarpa	1426	251	5e-65	0.61	0.74	2
08-E01	818	EEF38840.1	conserved hypothetical protein	Ricinus communis	299	257	8e-67	0.52	0.69	3
08-E03	351	YP_002870137.1	putative glutamate-ammonia-ligase adenylyltransferase	Pseudomonas fluorescens SBW25	979	224	2e-57	0.99	1	2
08-E04	627	XP_002263960.1	PREDICTED: hypothetical protein	Vitis vinifera	432	307	4e-82	0.8	0.89	1
08-E07	853	EEF52817.1	multicopper oxidase, putative	Ricinus communis	546	509	e-142	0.85	0.92	1
08-E10	865	XP_002311619.1	predicted protein	Populus trichocarpa	572	447	e-124	0.78	0.89	2
08-E12	824	XP_002298707.1	predicted protein	Populus trichocarpa	552	306	2e-81	0.82	0.9	2
08-E13	741	XP_002325070.1	predicted protein	Populus trichocarpa	648	318	3e-85	0.63	0.79	3
08-E16	314	YP_002551596.1	transcriptional regulator, NifA subfamily, Fis Family	Diaphorobacter sp. TPSY	536	83.6	6e-15	0.64	0.73	-1
08-E17	404	XP_002302834.1	predicted protein	Populus trichocarpa	650	237	3e-61	0.86	0.9	3
08-E18	858	XP_002275678.1	PREDICTED: hypothetical protein	Vitis vinifera	581	416	e-114	0.67	0.81	2
08-E23	674	EEF50085.1	pyruvate dehydrogenase, putative	Ricinus communis	368	328	e-108	0.9	0.95	1
08-F01	488	ABY65000.1	14-3-3a protein	Gossypium hirsutum	251	146	6e-34	1	1	3
08-F03	845	XP_002315675.1	predicted protein	Populus trichocarpa	481	534	e-150	0.91	0.97	1
08-F06	838	AAQ96339.1	putative ankyrin-repeat protein	Vitis aestivalis	354	262	3e-68	0.86	0.92	2
08-F15	843	XP_002304373.1	predicted protein	Populus trichocarpa	453	531	e-149	0.9	0.95	2
08-F18	834	ABN05685.1	RNA-directed DNA polymerase (Reverse transcriptase)	Medicago truncatula	1223	78.2	9e-13	0.36	0.56	-2
08-F21	891	EEF46470.1	60S ribosomal protein L37, putative	Ricinus communis	96	183	2e-44	0.89	0.97	3
08-F22	717	XP_002315252.1	predicted protein	Populus trichocarpa	123	220	1e-55	0.94	0.96	1
08-G07	794	XP_002279687.1	PREDICTED: hypothetical protein	Vitis vinifera	364	419	e-115	0.84	0.88	1
08-G13	835	XP_002277373.1	PREDICTED: hypothetical protein	Vitis vinifera	233	260	1e-67	0.76	0.87	1
08-G16	733	XP_002272974.1	PREDICTED: hypothetical protein	Vitis vinifera	364	217	1e-54	0.62	0.79	1
08-G23	803	EEF30051.1	oxysterol binding protein, putative	Ricinus communis	456	454	e-126	0.82	0.89	1
08-H17	818	BAC53928.1	beta-1,3-glucanase-like protein	Nicotiana tabacum	358	178	1e-80	0.63	0.81	1
08-H21	803	XP_002285871.1	PREDICTED: similar to PBC1 (20S proteasome beta subunit C1);peptidase isoform 1	Vitis vinifera	204	389	e-106	0.93	0.97	3
08-H22	518	XP_002309247.1	predicted protein	Populus trichocarpa	644	99.4	1e-19	0.63	0.68	-2
08-I01	742	EEF51268.1	conserved hypothetical protein	Ricinus communis	260	262	2e-68	0.61	0.75	1
[truncated: 2,863 more rows]
