# Supplementary material for: Generation, Annotation and Analysis of First Large-Scale Expressed Sequence Tags from Developing Fiber of Gossypium barbadense L
Source: PLoS One. 2011 Jul 28;6(7):e22758. doi: 10.1371/journal.pone.0022758 (PMC3145671; doi:10.1371/journal.pone.0022758)
Supplement: Table S5 — List of unigenes without blastx result. 990 (16.9%) of 5852 unique sequences showed no significant similarity to any sequences contained in the nr database. (XLS) [file pone.0022758.s009.xls]

## Sheet: TableS5_Nohits
Query	Q_Length
CO000042	664
CO000118	1111
CO000131	352
CO000148	523
CO000153	1037
CO000162	857
CO000210	836
CO000219	476
CO000231	919
CO000257	456
CO000259	573
CO000260	269
CO000320	244
CO000324	558
CO000342	582
CO000360	258
CO000365	133
CO000395	444
CO000417	459
CO000429	263
CO000440	395
CO000448	716
CO000472	614
CO000474	787
CO000494	456
CO000501	304
CO000528	929
CO000530	137
CO000554	913
CO000567	429
CO000604	570
CO000613	741
CO000619	527
CO000623	344
CO000656	780
CO000676	284
CO000695	202
CO000699	235
CO000728	212
CO000729	560
CO000766	1146
CO000799	587
CO000805	194
CO000811	585
CO000829	386
CO000849	952
CO000862	486
CO000869	270
CO000889	689
CO000896	834
CO000922	255
CO000958	777
CO000987	633
CO000997	788
CO001006	383
CO001007	588
CO001008	1204
CO001025	240
CO001034	867
CO001056	744
CO001069	473
CO001070	606
CO001088	622
CO001095	482
CO001096	301
CO001109	448
CO001145	731
CO001151	242
CO001162	375
CO001166	576
CO001175	448
CO001187	631
CO001190	885
CO001196	521
CO001198	589
CO001228	266
CO001241	289
CO001243	264
CO001258	346
CO001264	477
CO001265	610
CO001290	396
CO001291	239
CO001293	135
CO001294	488
CO001296	743
CO001299	420
CO001343	663
CO001346	182
CO001375	353
CO001378	704
CO001399	114
CO001402	580
CO001425	625
CO001433	291
CO001447	390
CO001453	205
CO001476	362
CO001483	164
CO001485	596
20-O17	122
23-G08	126
23-G11	203
23-G12	288
23-H02	579
23-H07	170
23-H24	668
23-I03	185
23-I06	347
23-I08	286
23-J06	174
23-J08	380
23-J17	246
01-I07	373
01-J24	780
01-L05	325
01-L13	217
01-L23	303
01-L24	117
01-N03	348
01-N05	204
01-P02	356
02-A06	252
02-A10	346
02-A23	261
02-B02	230
02-B22	258
02-D04	332
02-D09	221
02-D11	182
02-E07	342
02-F11	214
02-F14	515
02-F18	171
02-F21	236
02-G14	212
02-H01	817
02-H08	129
02-H14	767
02-H21	339
02-I13	670
02-J11	166
02-J15	129
02-K10	412
02-K19	234
02-L02	212
02-L15	266
02-N02	201
02-N18	230
02-O04	100
02-O16	381
02-O21	195
03-A03	902
03-A06	625
03-A19	192
03-A22	508
03-B06	140
03-B20	459
03-C09	517
03-C11	303
03-C12	107
03-E18	178
03-F16	179
03-F18	134
03-G09	141
03-G20	156
03-G23	844
03-H12	312
03-I08	621
03-J02	110
03-J06	283
03-K04	412
03-K17	189
03-L08	823
03-L24	223
03-M08	165
03-N09	109
03-N19	166
03-O13	535
04-A08	162
04-A22	108
04-B16	241
04-C23	526
04-D10	858
04-E07	449
04-F09	128
04-I13	119
04-K03	667
04-K07	685
04-K20	558
04-K24	697
04-M02	196
04-N14	673
04-P13	480
05-A05	210
05-A08	185
05-B03	512
05-C08	115
05-C12	180
05-E21	111
05-F03	284
05-H23	684
05-I07	284
05-J15	899
05-L16	294
05-N03	224
05-N18	136
05-O16	183
05-P06	882
05-P15	180
05-P17	275
05-P21	421
06-A15	494
06-A16	384
06-B09	173
06-B10	189
06-D03	719
06-D22	169
06-F19	106
06-G15	120
06-I03	319
06-I04	125
06-J13	108
06-J19	531
06-K06	244
06-L01	115
06-L04	573
06-L09	135
06-L11	150
06-L16	452
06-M03	175
06-M17	225
06-P13	834
07-A11	398
07-B03	112
07-C03	552
07-C05	790
07-C19	152
07-C22	144
07-E14	414
07-G04	191
07-G12	797
07-G17	748
07-H15	558
07-H18	703
07-K05	258
07-K24	120
07-N22	184
07-O04	231
07-O19	111
07-O21	875
07-P05	463
07-P23	373
08-A15	308
08-B19	271
08-C20	109
08-D02	421
08-D15	129
08-D17	649
08-F02	386
08-G01	359
08-I12	381
08-I13	200
08-J04	765
08-M04	331
08-M09	802
08-M18	786
08-M23	240
08-N23	167
08-N24	163
08-P04	257
08-P06	192
09-A04	299
09-A24	128
09-B09	348
09-B19	248
09-C07	232
09-C14	251
09-C20	830
09-E21	368
09-E23	394
09-F03	833
09-F06	207
09-G02	582
09-G07	541
09-G17	107
09-H05	476
09-H20	794
09-I05	189
09-J07	336
09-J12	518
09-M01	316
09-M05	225
09-M09	467
09-N09	310
09-O03	518
09-O24	348
09-P10	171
09-P13	428
10-B18	180
10-C01	153
10-C03	180
10-C06	131
10-C15	328
10-E20	657
10-F10	303
10-J05	268
10-J07	385
10-J22	273
10-K03	111
10-K04	206
10-K09	217
10-L03	283
10-M01	189
10-M05	159
10-M08	449
10-M09	535
10-M15	794
10-M16	120
10-N22	538
10-O19	225
10-O21	131
11-B10	117
11-C09	172
11-C21	464
11-E01	305
11-E14	166
11-E16	577
11-E20	776
11-F19	146
11-G22	267
11-I16	360
11-J10	560
11-K10	145
11-L01	129
11-L19	533
11-M22	781
11-O18	158
12-A14	101
12-A15	379
12-C01	419
12-C03	307
12-F04	141
12-F17	102
12-F22	151
12-G03	150
12-G14	142
12-G24	313
12-H10	761
12-I03	791
12-J13	338
12-J14	157
12-K19	478
12-L17	325
12-M01	147
12-M13	307
12-M23	318
12-N07	809
12-N23	150
12-O23	199
12-P12	238
13-A15	267
13-C19	216
13-D17	636
13-E06	190
13-E13	115
13-G15	281
13-H12	857
13-I01	341
13-I05	319
13-I14	269
13-I17	157
13-I20	300
13-J03	313
13-J15	699
13-L03	611
13-L14	187
13-L21	278
13-M04	271
13-M12	360
13-O07	522
13-O10	228
13-O21	178
13-P05	160
14-B09	519
14-C06	211
14-D19	392
14-D20	179
14-D22	335
14-E12	100
14-E15	793
14-H18	439
14-H20	117
14-I15	327
14-J09	198
14-K15	126
14-L08	167
14-L09	287
14-M05	355
14-M09	245
14-O08	199
14-O09	297
14-O15	353
14-O17	595
14-P16	179
15-A02	213
15-A19	241
15-B09	838
15-B17	818
15-B22	791
15-C22	148
15-D24	317
15-F05	860
15-F14	197
15-F19	323
15-F23	376
15-G16	858
15-G18	280
15-G19	434
15-H06	244
15-I07	110
15-J06	221
15-M14	127
15-M24	686
15-N04	122
15-N06	197
15-O23	266
16-A06	491
16-C19	271
16-D11	150
16-D20	222
16-D22	101
16-G16	216
16-H06	255
16-I22	751
16-J04	811
16-J21	106
16-K16	349
16-L10	191
16-L11	249
16-L18	527
16-L24	199
16-M02	235
16-M07	117
16-M16	747
16-N13	131
16-N14	125
16-N16	636
16-N20	282
16-N23	508
16-O05	212
16-O10	415
16-O13	456
16-O23	424
16-P07	502
16-P10	274
16-P11	857
16-P13	798
17-A15	532
17-A19	196
17-A20	812
17-A24	686
17-B01	751
17-B07	165
17-B08	378
17-B09	375
17-E04	287
17-E20	191
17-E21	144
17-G01	876
17-G11	294
17-G14	822
17-H01	292
17-I08	256
17-L21	708
17-M01	280
17-M06	548
17-N09	646
17-N12	164
17-N14	104
17-N18	100
17-O16	270
17-O24	387
17-P05	670
17-P22	379
18-A14	408
18-B06	352
18-B12	200
18-B15	416
18-C09	148
18-C16	321
18-C23	257
18-D06	204
18-D19	263
18-E05	335
18-E11	751
18-F02	751
18-G01	353
18-G04	723
18-G19	136
18-H15	424
18-I13	272
18-I16	558
18-I24	248
18-J02	716
18-J10	367
18-J16	160
18-J17	205
18-K02	173
18-K06	778
18-K08	434
18-M07	681
18-M16	638
18-N08	227
18-O15	815
18-P15	280
18-P17	823
19-A02	413
19-A06	446
19-A10	193
19-A11	207
19-B11	295
19-B12	294
19-B20	177
19-C03	233
19-D03	110
19-E08	129
19-E17	550
19-F16	134
19-F20	890
19-G14	648
19-G24	366
19-H16	166
19-I04	710
19-M18	283
19-N01	883
19-P18	877
20-A02	461
20-D07	125
20-E17	212
20-E18	339
20-F10	229
20-F15	304
20-G14	223
20-G20	129
20-I14	111
20-I15	109
20-J24	255
20-L06	188
20-M13	173
20-O05	289
21-A07	315
21-B05	604
21-B17	339
21-E14	314
21-F15	475
21-F22	397
21-G12	213
21-H06	275
21-H07	304
21-H22	151
21-J13	429
21-L11	289
21-M10	343
21-M11	148
21-P06	371
22-A20	571
22-A21	495
22-C13	914
22-C18	206
22-D09	261
22-F03	523
22-F18	602
22-F23	286
22-G13	285
22-H10	355
22-J08	107
22-J21	722
22-M06	323
22-M12	120
22-M23	271
22-N17	414
22-N20	307
22-O10	221
22-P03	414
22-P15	200
22-P23	298
23-A07	644
23-A11	131
23-A22	266
23-B03	447
23-B05	253
23-B09	277
23-B16	142
23-B23	382
23-C09	302
23-C11	792
23-C13	199
23-D06	563
23-D13	594
23-E10	837
23-E21	230
23-E24	302
23-F12	279
23-K08	255
23-K19	104
23-L11	851
23-L16	739
23-M07	251
23-M16	207
23-M19	400
23-N17	160
23-N19	403
23-N20	661
23-O04	138
23-O11	696
31-A02	150
31-A11	519
31-A12	214
31-A16	426
31-B16	296
31-C03	413
31-C13	320
31-C24	254
31-D03	327
31-D07	120
31-D11	355
31-E01	222
31-E03	336
31-E18	456
31-F16	116
31-K15	139
31-L02	838
31-M17	442
31-N10	590
31-N12	276
31-P18	217
31-P22	397
32-A22	895
32-C03	136
32-D06	119
32-D09	508
32-D15	310
32-E11	493
32-E18	658
32-F05	159
32-F09	265
32-F22	535
32-H15	817
32-H17	697
32-J11	494
32-J21	695
32-K03	220
32-K04	600
32-K05	688
32-K16	254
32-K20	198
32-L03	703
32-L14	151
32-L23	103
32-M16	377
32-M20	270
32-O08	265
32-P04	271
32-P05	292
32-P19	112
32-P22	139
33-A06	311
33-C06	190
33-D12	479
33-E01	124
33-F11	104
33-F19	120
33-F20	337
33-F22	311
33-G04	164
33-I16	342
33-I17	149
33-I19	153
33-K09	109
33-M19	646
33-M20	271
33-M23	104
33-O11	263
34-A09	157
34-B03	580
34-C07	154
34-D01	333
34-D19	274
34-E10	705
34-E24	788
34-F10	176
34-F13	299
34-F14	358
34-H01	107
34-H07	617
34-H12	387
34-H14	441
34-I02	472
34-J01	805
34-J08	179
34-K22	546
34-L12	455
34-L18	237
34-M07	533
34-O06	471
34-O17	656
34-O24	251
34-P21	875
34-P22	232
35-B21	849
35-B24	671
35-C05	541
35-C10	331
35-E10	201
35-E17	139
35-F04	466
35-F13	568
35-F17	496
35-H09	650
35-H21	292
35-I17	186
35-I20	586
35-J07	201
35-K08	230
35-L07	453
35-M22	268
35-N01	196
35-N24	502
35-O05	774
35-P14	486
35-P15	653
35-P19	151
36-B01	153
36-C04	186
36-D15	154
36-D19	149
36-E14	448
36-F14	167
36-H07	611
36-H24	227
36-I15	308
36-I18	165
36-K16	124
36-L12	120
36-L13	332
36-N07	727
36-P14	255
37-B14	484
37-B24	226
37-D05	142
37-D19	271
37-D20	139
37-E06	166
37-E14	221
37-E20	368
37-F05	249
37-G02	491
37-H10	174
37-H16	282
37-I05	104
37-I12	569
37-I18	135
37-I21	225
37-I22	505
37-J04	611
37-J14	103
37-K08	230
37-K17	217
37-K24	278
37-L01	165
37-L17	795
37-M01	178
37-M02	153
37-M20	391
38-B04	290
38-B24	163
38-D07	152
38-D12	264
38-D17	508
38-E22	269
38-F12	198
38-G02	352
38-G08	458
38-G21	135
38-I20	720
38-J10	219
38-J12	189
38-J18	255
38-K23	111
38-L18	539
38-N19	419
38-O03	171
38-O13	187
38-P03	162
39-A19	294
39-B05	698
39-B15	579
39-C18	333
39-C21	821
39-D01	312
39-F02	170
39-G21	134
39-G24	443
39-I22	285
39-J24	297
39-K04	324
39-M09	399
39-N13	139
39-N20	130
39-O03	203
39-O07	345
39-O13	537
39-P03	123
39-P14	155
39-P15	115
39-P21	186
39-P23	365
39-P24	428
40-A21	309
40-C03	551
40-D04	946
40-D10	246
40-E16	494
40-F08	355
40-F10	331
40-F15	142
40-F22	474
40-G11	186
40-H03	137
40-I01	351
40-J23	143
40-K04	142
40-K13	161
40-L12	582
40-M07	233
40-N14	317
40-N18	253
40-N23	557
40-O03	561
41-A17	258
41-B13	245
41-B18	517
41-C14	782
41-C23	143
41-E06	243
41-E23	625
41-G13	743
41-G23	157
41-H01	325
41-H12	147
41-I01	208
41-K03	280
41-K14	137
41-K21	167
41-L06	367
41-L08	166
41-L10	673
41-L13	352
41-N09	176
41-O15	631
41-P10	259
41-P18	504
42-A03	274
42-A07	152
42-D08	695
42-D23	467
42-D24	585
42-E04	162
42-E06	521
42-E16	164
42-F09	456
42-G19	251
42-H13	628
42-H15	424
42-H23	457
42-I22	446
42-J13	544
42-J18	197
42-K01	258
42-K21	106
42-K24	386
42-L11	390
42-M01	580
42-N01	599
42-N10	488
42-N11	265
42-O05	498
42-P03	304
43-D13	446
43-E20	686
43-G02	277
43-H17	267
43-I23	169
43-J06	191
43-K10	813
43-K21	851
43-L23	747
43-M06	262
43-M24	453
44-C23	417
44-E16	108
44-F18	185
44-G22	155
44-I09	376
44-I15	493
44-M18	136
44-O14	345
44-O21	218
44-P17	890
44-P21	422
45-A24	380
45-B06	447
45-C01	445
45-C08	528
45-C09	198
45-D10	138
45-F07	142
45-F24	167
45-G04	715
45-H04	138
45-K22	189
45-L09	444
45-M09	204
45-N05	754
45-N24	551
gb|EE592401.1	1098
gb|EE592405.1	435
gb|EE592409.1	707
gb|EE592417.1	152
gb|EE592423.1	396
gb|EE592456.1	173
gb|EE592526.1	871
gb|EE592532.1	962
gb|EE592533.1	965
gb|EE592542.1	454
gb|EE592555.1	393
gb|EE592560.1	190
gb|EE592573.1	192
gb|EE592574.1	810
gb|EE592619.1	100
gb|EE592634.1	1044
gb|EE592647.1	103
gb|EE592701.1	159
gb|EE592714.1	195
gb|EE592745.1	131
gb|EE592751.1	118
gb|EE592763.1	219
gb|EE592781.1	1001
gb|EE592789.1	187
gb|EE592790.1	493
gb|EE592797.1	329
gb|EE592811.1	416
gb|EE592826.1	623
gb|EE592828.1	124
gb|EE592838.1	276
gb|EE592860.1	554
gb|EE592865.1	230
gb|EE592869.1	334
gb|EE592898.1	197
gb|EE592916.1	182
gb|EE592938.1	519
gb|EE592941.1	325
gb|EE592950.1	248
gb|EE592963.1	631
gb|EE592972.1	703
gb|EE593004.1	406
gb|EE593007.1	118
gb|EE593014.1	266
gb|EE593015.1	443
gb|EE593025.1	662
gb|EE593034.1	551
gb|EE593038.1	153
gb|EE593064.1	1065
gb|EE593065.1	290
gb|EE593106.1	444
gb|EE593130.1	130
gb|EE593134.1	621
gb|EE593180.1	423
gb|EE593186.1	396
gb|EE593187.1	911
gb|EE593204.1	131
gb|EE593216.1	184
gb|EE593218.1	185
gb|EE593232.1	185
gb|EE593234.1	380
gb|EE593251.1	1061
gb|EE593265.1	187
gb|EE593278.1	279
gb|EE593283.1	610
