# Supplementary material for: Generation, Annotation and Analysis of First Large-Scale Expressed Sequence Tags from Developing Fiber of Gossypium barbadense L
Source: PLoS One. 2011 Jul 28;6(7):e22758. doi: 10.1371/journal.pone.0022758 (PMC3145671; doi:10.1371/journal.pone.0022758)
Supplement: Table S7 — Details of best blastx hits against nr and swissprot database E-value≤10−5 of the 2697 G. barbadense unigenes which have similarity with unknown function proteinsof nr database in GenBank. (XLS) [file pone.0022758.s011.xls]

## Sheet: TableS7_Unknown Function
Query	Q_Length	BlastX against nr database									BlastX against swissprot database
		S_NO.	S_Description	S_Organism	S_Length	Score	E_Value	Identities	Positives	Frame	S_NO.	S_Description	S_Organism	S_Length	Score	E_Value	Identities	Positives	Frame
01-I06	822	XP_002271601.1	PREDICTED: hypothetical protein	Vitis vinifera	320	349	2e-94	0.73	0.85	1	sp|Q54YW1	ELMOA_DICDI ELMO domain-containing protein A	Dictyostelium discoideum	977	83.6	2e-15	0.41	0.57	1
01-I11	648	XP_002270339.1	PREDICTED: hypothetical protein	Vitis vinifera	116	189	2e-46	0.79	0.83	2
01-J01	822	XP_002311814.1	predicted protein	Populus trichocarpa	921	176	2e-74	0.81	0.87	3
01-J05	603	XP_002270400.1	PREDICTED: hypothetical protein	Vitis vinifera	510	336	7e-91	0.9	0.95	3	sp|P22200	KPYC_SOLTU Pyruvate kinase, cytosolic isozyme	Solanumtuberosum	510	318	2e-86	0.83	0.92	3
01-J19	478	XP_002329111.1	predicted protein	Populus trichocarpa	108	91.7	2e-17	0.46	0.57	1
01-K05	604	XP_002279389.1	PREDICTED: hypothetical protein	Vitis vinifera	240	225	2e-57	0.91	0.95	2	sp|Q9SJ12	ATP7_ARATH Probable ATP synthase 24 kDa subunit,mitochondrial	Arabidopsis thaliana	240	197	4e-50	0.78	0.88	2
01-K08	828	XP_002327993.1	predicted protein	Populus trichocarpa	434	461	e-128	0.92	0.96	2	sp|O04153	CALR3_ARATH Calreticulin-3	Arabidopsis thalian	424	444	e-124	0.88	0.93	2
01-L16	906	XP_002300699.1	predicted protein	Populus trichocarpa	258	380	e-103	0.73	0.86	3	sp|Q4FZX7	SRPRB_RAT Signal recognition particle receptor subunitbeta	Rattus norvegicus	269	100	2e-20	0.31	0.47	3
01-M12	698	EEF47174.1	conserved hypothetical protein	Ricinus communis	482	401	e-110	0.82	0.9	2
01-M14	706	XP_002323946.1	predicted protein	Populus trichocarpa	414	161	6e-38	0.64	0.78	1	sp|O13633	YNF5_SCHPO Uncharacterized J domain-containing proteinC17A3.05c	Schizosaccharomyces pombe	403	51.6	5e-06	0.43	0.63	1
01-N08	718	XP_002269975.1	PREDICTED: hypothetical protein	Vitis vinifera	419	237	9e-61	0.62	0.75	2	sp|Q9CWK3	CD2B2_MOUSE CD2 antigen cytoplasmic tail-binding protein2	Mus musculus	342	54.3	8e-07	0.34	0.55	2
01-N14	634	EEF49617.1	conserved hypothetical protein	Ricinus communis	605	135	2e-30	0.9	0.9	3	sp|Q9FPS3	UBP24_ARATH Ubiquitin carboxyl-terminal hydrolase 24	Arabidopsis thaliana	551	112	3e-24	0.76	0.8	3
01-N15	880	XP_002306655.1	predicted protein	Populus trichocarpa	697	465	e-129	0.85	0.91	1	sp|Q5XF57	Y5576_ARATH Probable receptor-likeserine/threonine-protein kinase At5g57670	Arabidopsisthaliana	579	199	2e-50	0.44	0.65	1
01-N19	645	AAM64754.1	unknown	Arabidopsis thaliana	250	231	5e-59	0.61	0.72	3	sp|Q52532	MHPC_PSESP2-hydroxy-6-oxononadienedioate/2-hydroxy-6-oxononatrienedioate hydrolase	Pseudomonas sp.	283	58.9	3e-08	0.24	0.41	3
01-O06	790	XP_002268974.1	PREDICTED: hypothetical protein	Vitis vinifera	553	367	e-100	0.73	0.8	1	sp|Q9FPS3	UBP24_ARATH Ubiquitin carboxyl-terminal hydrolase 24	Arabidopsis thaliana	551	328	3e-89	0.65	0.76	1
01-P08	712	XP_002324292.1	predicted protein	Populus trichocarpa	133	176	2e-42	0.81	0.87	2	sp|O22969	Y2416_ARATH Uncharacterized protein At2g34160	Arabidopsis thaliana	130	159	2e-38	0.76	0.89	2
01-P12	661	XP_002275124.1	PREDICTED: hypothetical protein	Vitis vinifera	674	193	1e-47	0.84	0.89	1	sp|Q96PP8	GBP5_HUMAN Guanylate-binding protein 5	Homo sapien	586	65.1	4e-10	0.38	0.62	1
01-P16	822	XP_002299451.1	predicted protein	Populus trichocarpa	312	252	3e-65	0.54	0.71	2	sp|Q9M3A3	ABIL2_ARATH Protein ABIL2	Arabidopsis thalian	312	210	8e-54	0.46	0.63	2
01-P18	481	ABA81856.1	unknown	Solanum tuberosum	194	139	7e-32	0.93	1	2	sp|P49210	RL9_ORYSJ 60S ribosomal protein L9	Oryza sativa subsp.japonica	190	135	1e-31	0.91	0.98	2
01-P21	840	EEF51002.1	conserved hypothetical protein	Ricinus communis	342	285	3e-75	0.63	0.73	1
02-A02	518	ACJ85516.1	unknown	Medicago truncatula	267	174	4e-42	0.93	0.98	1	sp|Q9SGW3	RP12A_ARATH 26S proteasome non-ATPase regulatory subunitRPN12A	Arabidopsis thaliana	267	158	2e-38	0.85	0.94	1
02-A13	670	XP_002325506.1	predicted protein	Populus trichocarpa	829	400	e-110	0.87	0.95	1	sp|O81852	AKH2_ARATH Bifunctional aspartokinase/homoserinedehydrogenase 2, chloroplastic	Arabidopsis thalian	916	390	e-108	0.87	0.91	1
02-A24	874	CAN67759.1	hypothetical protein	Vitis vinifera	385	323	1e-86	0.71	0.83	1	sp|Q3YJT0	PT2K4_SOLTU Patatin-2-Kuras 4	Solanum tuberosu	374	87.8	9e-17	0.26	0.5	1
02-B13	852	XP_002279073.1	PREDICTED: hypothetical protein	Vitis vinifera	1121	328	e-135	0.91	0.96	1	sp|Q08DZ2	PRP4B_BOVIN Serine/threonine-protein kinase PRP4 homolog	Bos taurus	1008	190	1e-78	0.55	0.7	1
02-B17	639	XP_002313491.1	predicted protein	Populus trichocarpa	220	172	2e-41	0.85	0.9	1	sp|Q9FMR5	VA714_ARATH Vesicle-associated membrane protein 714	Arabidopsis thaliana	221	159	2e-38	0.77	0.85	1
02-C19	859	XP_002316239.1	predicted protein	Populus trichocarpa	306	365	4e-99	0.92	0.97	3	sp|Q6DBP3	PT505_ARATH Probable sugar phosphate/phosphatetranslocator At5g05820	Arabidopsis thalian	309	357	8e-98	0.89	0.95	3
02-C22	811	XP_002274615.1	PREDICTED: hypothetical protein	Vitis vinifera	182	129	2e-48	0.58	0.7	1
02-D01	854	XP_002263398.1	PREDICTED: hypothetical protein	Vitis vinifera	422	343	2e-92	0.91	0.95	2	sp|Q9FVS6	KSG4_ARATH Shaggy-related protein kinase delta	Arabidopsis thaliana	420	326	1e-88	0.84	0.93	2
02-E04	178	YP_002873261.1	hypothetical protein PFLU3703	Pseudomonas fluorescens SBW25	612	115	1e-24	1	1	-1
02-E06	808	XP_002273260.1	PREDICTED: hypothetical protein	Vitis vinifera	563	479	e-133	0.86	0.92	1	sp|Q6NZ07	NCLN_DANRE Nicalin-1	Danio rerio	572	178	3e-44	0.4	0.6	1
02-E22	824	XP_002275920.1	PREDICTED: hypothetical protein	Vitis vinifera	599	433	e-119	0.79	0.88	2	sp|P0AEB5	YNAI_ECOLI MscS family inner membrane protein ynaI	Escherichia coli (strain K12)	343	103	1e-21	0.37	0.56	2
02-E24	813	XP_002275982.1	PREDICTED: hypothetical protein	Vitis vinifera	297	283	1e-74	0.77	0.85	2	sp|Q9LTV6	DECR2_ARATH Peroxisomal 2,4-dienoyl-CoA reductase	Arabidopsis thaliana	298	259	2e-68	0.69	0.83	2
02-F06	807	XP_002302340.1	predicted protein	Populus trichocarpa	446	431	e-125	0.9	0.95	2	sp|O00189	AP4M1_HUMAN AP-4 complex subunit mu-1	Homo sapien	453	181	7e-48	0.39	0.62	2
02-F07	829	XP_002282307.1	PREDICTED: hypothetical protein	Vitis vinifera	727	202	2e-50	0.44	0.58	1
02-F10	710	XP_002273708.1	PREDICTED: hypothetical protein	Vitis vinifera	536	347	4e-94	0.87	0.95	3	sp|Q39817	CALX_SOYBN Calnexin homolog	Glycine max	546	347	6e-95	0.85	0.94	3
02-F12	867	XP_002311140.1	predicted protein	Populus trichocarpa	794	382	e-104	0.75	0.79	3	sp|Q64623	DUS1_RAT Dual specificity protein phosphatase 1	Rattusnorvegicus	367	74.3	1e-12	0.34	0.62	3
02-F19	818	EEF43518.1	conserved hypothetical protein	Ricinus communis	536	265	4e-69	0.49	0.66	2
02-G05	444	XP_002272848.1	PREDICTED: hypothetical protein	Vitis vinifera	282	106	7e-22	0.75	0.95	1	sp|Q9S9Z7	P2C10_ARATH Probable protein phosphatase 2C 10	Arabidopsis thaliana	282	97.4	3e-20	0.7	0.89	1
02-G09	307	EEF43792.1	protein with unknown function	Ricinus communis	373	180	5e-44	0.9	0.94	3	sp|Q2MHE4	HT1_ARATH Serine/threonine-protein kinase HT1	Arabidopsis thaliana	390	150	3e-36	0.71	0.81	3
02-G21	823	XP_002284504.1	PREDICTED: hypothetical protein	Vitis vinifera	223	193	2e-47	0.72	0.79	3	sp|O80366	ARR9_ARATH Two-component response regulator ARR9	Arabidopsis thaliana	234	151	6e-36	0.56	0.75	3
02-G22	848	XP_002304917.1	predicted protein	Populus trichocarpa	137	191	1e-46	0.87	0.91	2	sp|C0LU16	MED21_ARATH Mediator of RNA polymerase II transcriptionsubunit 21	Arabidopsis thaliana	139	175	4e-43	0.79	0.87	2
02-G23	710	XP_002276973.1	PREDICTED: hypothetical protein	Vitis vinifera	261	182	2e-44	0.68	0.71	2	sp|Q5EB97	ZCH10_RAT Zinc finger CCHC domain-containing protein 10	Rattus norvegicus	173	56.2	2e-07	0.65	0.81	2
02-H03	841	XP_002336405.1	predicted protein	Populus trichocarpa	144	204	8e-51	0.73	0.81	3
02-H06	801	XP_002303829.1	predicted protein	Populus trichocarpa	469	247	1e-63	0.52	0.63	2	sp|Q8LBL5	PRT1_ARATH E3 ubiquitin-protein ligase PRT1	Arabidopsis thaliana	410	191	5e-48	0.43	0.57	2
02-H10	670	EEF52894.1	conserved hypothetical protein	Ricinus communis	166	155	2e-36	0.61	0.71	1
02-H13	785	ABK96151.1	unknown	Populus trichocarpa	311	332	2e-89	0.77	0.89	2	sp|Q8S9M1	PAP13_ARATH Probable plastid-lipid-associated protein 13,chloroplastic	Arabidopsis thaliana	299	295	3e-79	0.73	0.84	2
02-H16	768	EEF50312.1	conserved hypothetical protein	Ricinus communis	267	266	2e-69	0.71	0.82	2
02-J17	415	XP_002305407.1	predicted protein	Populus trichocarpa	54	101	2e-20	0.85	0.92	2	sp|Q9XIA7	TOM6_ARATH Mitochondrial import receptor subunit TOM6homolog	Arabidopsis thaliana	54	89	8e-18	0.7	0.83	2
02-J19	775	XP_002326994.1	predicted protein	Populus trichocarpa	546	391	e-107	0.83	0.87	3	sp|P28769	TCPA_ARATH T-complex protein 1 subunit alpha	Arabidopsisthaliana	545	386	e-107	0.81	0.87	3
02-J23	773	XP_002301486.1	predicted protein	Populus trichocarpa	450	455	e-126	0.86	0.94	1	sp|P85076	PME_ACTDE Pectinesterase	Actinidia deliciosa	321	375	e-103	0.77	0.88	1
02-K11	834	XP_002327526.1	predicted protein	Populus trichocarpa	371	340	1e-91	0.8	0.82	3	sp|Q9LSC2	Y3589_ARATH PTI1-like tyrosine-protein kinase At3g15890	Arabidopsis thaliana	361	266	2e-70	0.65	0.78	3
02-K16	467	XP_002310326.1	predicted protein	Populus trichocarpa	410	166	7e-40	0.92	0.97	2	sp|Q9M401	BCAT3_ARATH Branched-chain-amino-acid aminotransferase 3,chloroplastic	Arabidopsis thaliana	413	144	2e-34	0.8	0.88	2
02-K22	830	XP_002297662.1	predicted protein	Populus trichocarpa	394	400	e-109	0.85	0.9	1	sp|P80030	FABI_BRANA Enoyl-[acyl-carrier-protein] reductase [NADH],chloroplastic	Brassica napus	385	361	4e-99	0.79	0.84	1
02-L12	750	XP_002330535.1	predicted protein	Populus trichocarpa	643	233	1e-59	0.53	0.7	2	sp|Q9FH18	WIP2_ARATH WPP domain-interacting protein 2	Arabidopsis thaliana	509	123	1e-27	0.38	0.56	2
02-L24	811	XP_002304866.1	predicted protein	Populus trichocarpa	313	231	3e-75	0.95	0.96	2	sp|Q9XGH7	PP2A_TOBAC Serine/threonine-protein phosphatase PP2Acatalytic subunit	Nicotiana tabacum	312	233	6e-75	0.96	0.97	2
02-M04	661	XP_002281433.1	PREDICTED: hypothetical protein	Vitis vinifera	428	270	6e-71	0.68	0.79	1
02-M08	673	XP_002285428.1	PREDICTED: hypothetical protein	Vitis vinifera	207	183	1e-44	0.55	0.61	3
02-M14	722	XP_002331484.1	predicted protein	Populus trichocarpa	136	229	2e-58	0.84	0.9	2	sp|Q2G8H4	RS16_NOVAD 30S ribosomal protein S16	Novosphingobiumaromaticivorans (strain DSM 12444)	145	93.6	1e-18	0.51	0.75	2
02-M19	173	XP_002303787.1	predicted protein	Populus trichocarpa	915	108	1e-22	0.87	0.94	2	sp|Q9FYG2	CMTA4_ARATH Calmodulin-binding transcription activator 4	Arabidopsis thaliana	1016	88.2	1e-17	0.74	0.9	2
02-N05	722	ACN26595.1	unknown	Zea mays	556	435	e-120	0.88	0.93	1	sp|Q42908	PMGI_MESCR 2,3-bisphosphoglycerate-independentphosphoglycerate mutase	Mesembryanthemum crystallinu	559	431	e-120	0.87	0.94	1
02-N20	752	XP_002284215.1	PREDICTED: hypothetical protein	Vitis vinifera	243	239	1e-61	0.57	0.64	1	sp|Q3T0I4	THOC4_BOVIN THO complex subunit 4	Bos taurus	257	126	1e-28	0.45	0.62	1
02-N21	401	XP_002301997.1	predicted protein	Populus trichocarpa	523	117	3e-25	0.63	0.85	2
02-O02	721	XP_002305871.1	predicted protein	Populus trichocarpa	216	207	6e-52	0.57	0.7	3	sp|Q6NLC8	Y1648_ARATH Uncharacterized protein At1g66480	Arabidopsis thaliana	225	158	4e-38	0.51	0.65	3
02-O09	773	XP_002329585.1	predicted protein	Populus trichocarpa	612	285	4e-75	0.9	0.94	2	sp|Q94EJ6	PMTE_ARATH Probable methyltransferase PMT14	Arabidopsis thaliana	621	265	3e-70	0.82	0.88	2
02-O11	712	XP_002315359.1	predicted protein	Populus trichocarpa	750	317	7e-85	0.84	0.89	1	sp|Q9LRB0	LCBK1_ARATH Sphingoid long-chain bases kinase 1	Arabidopsis thaliana	763	285	2e-76	0.79	0.85	1
02-O12	737	XP_002266148.1	PREDICTED: hypothetical protein	Vitis vinifera	361	315	3e-84	0.64	0.79	1	sp|Q6J163	5NG4_PINTA Auxin-induced protein 5NG4	Pinus taeda	410	150	1e-35	0.35	0.55	1
02-O19	784	ABK94712.1	unknown	Populus trichocarpa	205	238	6e-61	0.72	0.86	3	sp|Q84MC0	UGPI4_ARATH Uncharacterized GPI-anchored proteinAt3g06035	Arabidopsis thaliana	200	218	5e-56	0.68	0.81	3
02-O20	820	XP_002330501.1	predicted protein	Populus trichocarpa	568	343	1e-92	0.66	0.76	3	sp|Q9SSK1	SYNC3_ARATH Asparaginyl-tRNA synthetase, cytoplasmic 3	Arabidopsis thaliana	571	325	2e-88	0.64	0.74	3
02-P18	832	XP_002310095.1	predicted protein	Populus trichocarpa	240	265	3e-69	0.59	0.68	1
02-P21	696	EEF50077.1	conserved hypothetical protein	Ricinus communis	119	152	3e-35	0.72	0.83	1
03-A04	821	XP_002285913.1	PREDICTED: hypothetical protein	Vitis vinifera	541	365	4e-99	0.82	0.94	1	sp|Q00624	ASOL_BRANA L-ascorbate oxidase homolog	Brassica napu	555	216	2e-55	0.53	0.7	1
03-A10	783	XP_002325549.1	predicted protein	Populus trichocarpa	409	369	e-100	0.68	0.77	1	sp|Q9C8W3	FUT13_ARATH Alpha-(1,4)-fucosyltransferase	Arabidopsisthaliana	401	332	1e-90	0.67	0.79	1
03-A20	726	XP_002274525.1	PREDICTED: hypothetical protein isoform 1	Vitis vinifera	191	274	7e-72	0.74	0.85	1	sp|P23438	SSRB_CANFA Translocon-associated protein subunit beta	Canis familiaris	183	52.4	3e-06	0.29	0.51	1
03-B01	788	XP_002302309.1	predicted protein	Populus trichocarpa	329	121	1e-40	0.55	0.61	1
03-B05	897	CAO15972.1	unnamed protein product	Vitis vinifera	274	316	2e-84	0.66	0.75	3	sp|Q9LDR4	ERG24_ARATH Delta(14)-sterol reductase	Arabidopsisthaliana	369	301	3e-81	0.64	0.74	3
03-B21	824	ABK96176.1	unknown	Populus trichocarpa	294	399	e-109	0.98	0.99	1	sp|O81221	ACT_GOSHI Actin	Gossypium hirsutum	377	398	e-110	0.97	0.99	1
03-C02	799	XP_002264210.1	PREDICTED: hypothetical protein	Vitis vinifera	367	417	e-115	0.9	0.95	1	sp|Q38799	ODPB_ARATH Pyruvate dehydrogenase E1 component subunitbeta, mitochondrial	Arabidopsis thaliana	363	387	e-107	0.83	0.91	1
03-C03	784	XP_002305145.1	predicted protein	Populus trichocarpa	214	275	3e-72	0.63	0.73	1
03-C14	820	EEF31175.1	conserved hypothetical protein	Ricinus communis	192	160	2e-37	0.49	0.59	2
03-D02	367	YP_002875284.1	hypothetical protein PFLU5795	Pseudomonas fluorescens SBW25	398	244	2e-63	1	1	2	sp|C4L7I7	RLMI_TOLAT Ribosomal RNA large subunit methyltransferaseI	Tolumonas auensis (strain DSM 9187 / TA4)	397	89.4	6e-18	0.39	0.57	2
03-D07	820	XP_002331535.1	predicted protein	Populus trichocarpa	415	293	1e-77	0.71	0.85	3	sp|Q9SCT4	IMK2_ARATH Probably inactive leucine-rich repeatreceptor-like protein kinase IMK2	Arabidopsisthaliana	836	107	1e-22	0.37	0.52	3
03-D12	375	XP_002266901.1	PREDICTED: hypothetical protein	Vitis vinifera	54	94.7	3e-18	0.79	0.9	2	sp|Q9SD80	TOM5_ARATH Mitochondrial import receptor subunit TOM5homolog	Arabidopsis thaliana	54	80.9	2e-15	0.61	0.85	2
03-D19	791	XP_002321899.1	predicted protein	Populus trichocarpa	198	304	7e-81	0.77	0.86	1	sp|P42404	PHI_BACSU 3-hexulose-6-phosphate isomerase	Bacillussubtilis	185	92.8	2e-18	0.33	0.52	1
03-D21	736	CAO65159.1	unnamed protein product	Vitis vinifera	1757	291	4e-77	0.61	0.74	2
03-E02	819	XP_002263210.1	PREDICTED: hypothetical protein	Vitis vinifera	292	408	e-112	0.94	0.97	2	sp|Q8RXV3	P2C59_ARATH Probable protein phosphatase 2C 59	Arabidopsis thaliana	311	405	e-112	0.94	0.96	2
03-E13	609	CAN60816.1	hypothetical protein	Vitis vinifera	82	159	2e-37	0.92	0.96	2	sp|P35687	RS21_ORYSJ 40S ribosomal protein S21	Oryza sativasubsp. japonica	82	143	7e-34	0.8	0.92	2
03-E20	818	XP_002266077.1	PREDICTED: hypothetical protein	Vitis vinifera	216	244	7e-63	0.62	0.73	3	sp|Q9ZVI6	LOR8_ARATH Protein LURP-one-related 8	Arabidopsisthaliana	196	194	5e-49	0.51	0.68	3
03-E21	591	XP_002303525.1	predicted protein	Populus trichocarpa	410	116	1e-24	0.91	0.95	2	sp|Q93YR3	F10AL_ARATH FAM10 family protein At4g22670	Arabidopsisthaliana	441	112	2e-24	0.91	0.94	2
03-F04	589	XP_002271949.1	PREDICTED: hypothetical protein	Vitis vinifera	296	116	1e-24	0.65	0.71	3	sp|Q9LSD5	TCP20_ARATH Transcription factor TCP20	Arabidopsisthaliana	314	85.1	3e-16	0.5	0.61	3
03-F07	825	XP_002281335.1	PREDICTED: hypothetical protein	Vitis vinifera	418	369	e-100	0.75	0.82	2	sp|P0A9T5	TAS_SHIFL Protein tas	Shigella flexneri	346	174	5e-43	0.45	0.63	2
03-F13	789	CAN80644.1	hypothetical protein	Vitis vinifera	774	142	4e-32	0.32	0.55	2
03-G10	587	CAO63346.1	unnamed protein product	Vitis vinifera	312	161	4e-38	0.7	0.83	2	sp|Q8H1U4	APC5_ARATH Anaphase-promoting complex subunit 5	Arabidopsis thaliana	916	158	2e-38	0.73	0.86	2
03-G14	634	XP_002265092.1	PREDICTED: hypothetical protein	Vitis vinifera	587	145	3e-33	0.43	0.55	3
03-H05	745	XP_002313024.1	predicted protein	Populus trichocarpa	821	421	e-116	0.82	0.87	1	sp|Q920R6	VPP4_MOUSE V-type proton ATPase 116 kDa subunit a isoform 4	Mus musculus	833	170	8e-42	0.37	0.57	1
03-H08	838	EEF27941.1	conserved hypothetical protein	Ricinus communis	422	228	e-99	0.73	0.8	2	sp|Q8L736	SKI11_ARATH F-box/kelch-repeat protein SKIP11	Arabidopsis thaliana	467	197	1e-82	0.62	0.75	2
03-H09	815	ACJ85349.1	unknown	Medicago truncatula	285	491	e-137	0.92	0.99	3	sp|O24076	GBLP_MEDSA Guanine nucleotide-binding protein subunitbeta-like protein	Medicago sativa	325	490	e-138	0.92	0.99	3
03-H20	852	XP_002297657.1	predicted protein	Populus trichocarpa	399	190	1e-46	0.91	0.96	1	sp|Q8LAP6	PAP12_ARATH Probable plastid-lipid-associated protein 12,chloroplastic	Arabidopsis thaliana	409	181	6e-45	0.85	0.92	1
03-I02	797	XP_002297795.1	predicted protein	Populus trichocarpa	772	428	e-118	0.86	0.9	2
03-I06	849	XP_002263524.1	PREDICTED: hypothetical protein	Vitis vinifera	222	163	2e-38	0.46	0.53	3	sp|Q5RFQ1	SSXT_PONAB Protein SSXT	Pongo abelii	418	62.4	4e-09	0.57	0.71	3
03-I07	810	EEF36070.1	conserved hypothetical protein	Ricinus communis	385	347	1e-93	0.78	0.88	2
03-I13	637	XP_002320047.1	predicted protein	Populus trichocarpa	466	295	2e-78	0.67	0.79	3
03-I20	827	EEE67582.1	hypothetical protein OsJ_25113	Oryza sativa Japonica Group	915	242	4e-62	0.45	0.65	-2	sp|P08548	LIN1_NYCCO LINE-1 reverse transcriptase homolog	Nycticebus coucang	1260	100	1e-20	0.28	0.47	-2
03-J11	693	EEE50824.1	hypothetical protein OsJ_31232	Oryza sativa Japonica Group	1594	138	5e-44	0.53	0.72	-2	sp|P92555	M1250_ARATH Uncharacterized mitochondrial proteinAtMg01250	Arabidopsis thaliana	122	61.2	6e-09	0.52	0.7	-1
03-J12	849	CAN62047.1	hypothetical protein	Vitis vinifera	551	362	2e-98	0.67	0.77	2	sp|P0C897	Y3264_ARATH Putative UPF0481 protein At3g02645	Arabidopsis thaliana	529	270	7e-72	0.53	0.71	2
03-J13	854	XP_002316992.1	predicted protein	Populus trichocarpa	411	160	1e-37	0.42	0.61	1	sp|Q9LUP5	FBK59_ARATH F-box/kelch-repeat protein At3g17530	Arabidopsis thaliana	392	69.7	2e-11	0.3	0.46	1
03-J21	847	CAN81585.1	hypothetical protein	Vitis vinifera	461	405	e-111	0.78	0.84	3	sp|Q56WD9	THIK2_ARATH 3-ketoacyl-CoA thiolase 2, peroxisomal	Arabidopsis thaliana	462	388	e-107	0.75	0.82	3
03-K12	416	XP_002322710.1	predicted protein	Populus trichocarpa	776	132	9e-30	0.81	0.87	3	sp|Q94A08	RFS2_ARATH Probable galactinol--sucrosegalactosyltransferase 2	Arabidopsis thaliana	773	113	4e-25	0.66	0.77	3
03-K18	813	XP_002452705.1	hypothetical protein SORBIDRAFT_04g031060	Sorghum bicolor	459	468	e-130	0.99	0.99	1	sp|P0CH32	UBQ4_ARATH Polyubiquitin 4	Arabidopsis thalian	382	468	e-131	0.99	0.99	1
03-L05	845	XP_002308514.1	predicted protein	Populus trichocarpa	131	156	2e-36	0.57	0.75	3
03-L12	866	XP_002277969.1	PREDICTED: similar to mRNA capping enzyme family protein	Vitis vinifera	677	472	e-131	0.77	0.86	2	sp|O60942	MCE1_HUMAN mRNA-capping enzyme	Homo sapiens	597	124	6e-28	0.34	0.51	2
03-L20	768	XP_002263238.1	PREDICTED: hypothetical protein	Vitis vinifera	315	387	e-106	0.79	0.87	2	sp|Q94JW0	DOHH_ARATH Deoxyhypusine hydroxylase	Arabidopsisthaliana	314	365	e-100	0.72	0.84	2
03-M02	785	XP_002323884.1	predicted protein	Populus trichocarpa	267	350	1e-94	0.7	0.79	3
03-M03	866	XP_002278805.1	PREDICTED: hypothetical protein	Vitis vinifera	364	288	6e-76	0.54	0.64	3	sp|O22892	GSR2_ARATH Uncharacterized protein At2g40430	Arabidopsis thaliana	442	136	2e-31	0.47	0.6	3
03-M15	856	XP_002320491.1	predicted protein	Populus trichocarpa	188	140	2e-53	0.59	0.75	3
03-M21	771	XP_002266692.1	PREDICTED: hypothetical protein	Vitis vinifera	424	256	1e-66	0.78	0.87	1	sp|Q53PP5	TLP13_ORYSJ Tubby-like F-box protein 13	Oryza sativasubsp. japonica	440	232	4e-62	0.73	0.88	1
03-N07	369	YP_002773718.1	hypothetical protein BBR47_42370	Brevibacillus brevis NBRC 100599	406	53.5	7e-06	0.47	0.6	2
03-N14	741	XP_002270347.1	PREDICTED: hypothetical protein	Vitis vinifera	341	238	3e-61	0.68	0.73	3	sp|O78458	YCF37_GUITH Uncharacterized protein ycf37	Guillardiatheta	178	59.3	3e-08	0.31	0.54	3
03-N17	695	XP_002279202.1	PREDICTED: hypothetical protein	Vitis vinifera	713	268	3e-70	0.65	0.74	2	sp|Q10EL1	C3H24_ORYSJ Zinc finger CCCH domain-containing protein 24	Oryza sativa subsp. japonica	764	175	3e-43	0.49	0.66	2
03-N21	738	CAO49821.1	unnamed protein product	Vitis vinifera	347	319	2e-85	0.81	0.89	2
03-O03	820	XP_002283608.1	PREDICTED: hypothetical protein	Vitis vinifera	497	313	9e-84	0.89	0.95	3	sp|Q42525	HXK1_ARATH Hexokinase-1	Arabidopsis thaliana	496	286	1e-76	0.81	0.9	3
03-O07	733	XP_002307132.1	predicted protein	Populus trichocarpa	138	268	4e-70	0.96	1	3	sp|Q9D7M8	RPB4_MOUSE DNA-directed RNA polymerase II subunit RPB4	Mus musculus	142	106	1e-22	0.37	0.68	3
03-O23	691	EEH50840.1	predicted protein	Micromonas pusilla CCMP1545	152	170	1e-40	0.92	0.95	-1
03-P18	843	YP_002085617.1	hypothetical protein PA2G_00222	Pseudomonas aeruginosa 2192	482	208	5e-52	0.42	0.55	3	sp|Q51397	OPRJ_PSEAE Outer membrane protein oprJ	Pseudomonasaeruginosa	479	65.5	4e-10	0.35	0.51	3
04-A13	867	EEF34184.1	conserved hypothetical protein	Ricinus communis	683	273	2e-71	0.55	0.64	2
04-A18	785	XP_002284743.1	PREDICTED: hypothetical protein	Vitis vinifera	216	217	1e-54	0.65	0.77	1	sp|Q9C5C5	TRL4_ARATH Thioredoxin-like 4, chloroplastic	Arabidopsis thaliana	204	169	1e-41	0.76	0.87	1
04-B19	254	XP_002436992.1	hypothetical protein SORBIDRAFT_10g014200	Sorghum bicolor	689	53.5	7e-06	0.64	0.79	2
04-C05	596	EEF39607.1	conserved hypothetical protein	Ricinus communis	129	158	3e-37	0.81	0.93	1
04-D11	797	XP_002283110.1	PREDICTED: hypothetical protein isoform 1	Vitis vinifera	1761	234	5e-60	0.51	0.67	2
04-D22	462	XP_002299901.1	predicted protein	Populus trichocarpa	398	71.2	3e-11	0.88	0.97	1
04-E14	888	XP_002311649.1	predicted protein	Populus trichocarpa	591	417	e-115	0.73	0.8	2	sp|Q43117	KPYA_RICCO Pyruvate kinase isozyme A, chloroplastic	Ricinus communis	583	415	e-115	0.74	0.8	2
04-E17	827	XP_002308755.1	predicted protein	Populus trichocarpa	412	384	e-105	0.77	0.86	1	sp|Q9FIK7	THIC2_ARATH Probable acetyl-CoA acetyltransferase,cytosolic 2	Arabidopsis thaliana	415	372	e-102	0.73	0.86	1
04-E23	813	XP_002305841.1	predicted protein	Populus trichocarpa	348	263	2e-68	0.8	0.92	3	sp|A1L112	WDR55_RAT WD repeat-containing protein 55	Rattusnorvegicus	384	127	7e-29	0.44	0.62	3
04-F17	825	XP_002262924.1	PREDICTED: hypothetical protein	Vitis vinifera	216	335	4e-90	0.77	0.84	3
04-F20	727	XP_002270340.1	PREDICTED: hypothetical protein	Vitis vinifera	811	325	3e-87	0.91	0.98	2	sp|Q7TP47	HNRPQ_RAT Heterogeneous nuclear ribonucleoprotein Q	Rattus norvegicus	533	93.2	2e-18	0.35	0.54	2
04-G22	537	XP_002310123.1	predicted protein	Populus trichocarpa	358	246	9e-64	0.9	0.96	2	sp|Q6P1R4	DUS1L_HUMAN tRNA-dihydrouridine synthase 1-like	Homosapiens	473	158	2e-38	0.53	0.73	2
04-H19	765	EEF52434.1	conserved hypothetical protein	Ricinus communis	131	113	2e-23	0.57	0.67	3
04-I22	827	XP_002306858.1	predicted protein	Populus trichocarpa	341	346	1e-93	0.81	0.88	3	sp|Q9Z826	Y526_CHLPN Uncharacterized proteinCPn_0526/CP_0226/CPj0526/CpB0547	Chlamydia pneumonia	329	157	6e-38	0.39	0.58	3
04-J04	847	XP_002317490.1	predicted protein	Populus trichocarpa	253	389	e-106	0.82	0.86	2
04-J09	672	XP_002278858.1	PREDICTED: hypothetical protein	Vitis vinifera	866	310	7e-83	0.79	0.91	3	sp|Q757Q6	GLGB_ASHGO 1,4-alpha-glucan-branching enzyme	Ashbyagossypii (strain ATCC 10895 / CBS 109.51 / FGSC 9923 /NRRL Y-1056)	703	147	5e-35	0.44	0.64	3
04-J16	841	XP_002273898.1	PREDICTED: hypothetical protein	Vitis vinifera	1197	503	e-140	0.88	0.93	2	sp|Q9U1M8	MYOI_DICDI Myosin-I heavy chain	Dictyosteliumdiscoideum	2357	217	7e-56	0.46	0.67	2
04-J23	745	ABK94768.1	unknown	Populus trichocarpa	319	173	1e-41	0.59	0.7	1	sp|O80327	TLP1_PYRPY Thaumatin-like protein 1	Pyrus pyrifoli	244	113	2e-24	0.68	0.78	1
04-K05	791	XP_002282343.1	PREDICTED: hypothetical protein	Vitis vinifera	269	233	1e-59	0.67	0.87	3	sp|Q54TS4	YIPF1_DICDI Protein YIPF1 homolog	Dictyosteliumdiscoideum	347	97.8	7e-20	0.29	0.57	3
04-L08	773	XP_002264896.1	PREDICTED: hypothetical protein	Vitis vinifera	572	400	e-110	0.81	0.89	1	sp|Q682S0	RPT2_ARATH Root phototropism protein 2	Arabidopsisthaliana	593	365	e-100	0.71	0.84	1
04-L11	319	YP_002871128.1	hypothetical protein PFLU1483	Pseudomonas fluorescens SBW25	408	122	9e-27	0.92	0.98	3	sp|Q01602	OPDE_PSEAE Transcription regulatory protein opdE	Pseudomonas aeruginosa	402	48.9	1e-05	0.57	0.72	3
04-L19	362	XP_002306240.1	predicted protein	Populus trichocarpa	73	102	1e-20	0.67	0.77	3
04-M01	269	CAO43953.1	unnamed protein product	Vitis vinifera	564	76.6	7e-13	0.46	0.6	2	sp|Q84KJ5	CRYD_ARATH Cryptochrome DASH, chloroplastic/mitochondrial	Arabidopsis thaliana	569	62	1e-09	0.6	0.76	2
04-M19	543	XP_002299013.1	predicted protein	Populus trichocarpa	68	122	2e-26	0.84	0.93	2
04-N16	688	XP_002276521.1	PREDICTED: hypothetical protein	Vitis vinifera	137	238	5e-61	0.95	0.99	2	sp|Q9SS17	RS241_ARATH 40S ribosomal protein S24-1	Arabidopsisthaliana	133	228	2e-59	0.9	0.99	2
04-N18	803	NP_175882.2	unknown protein	Arabidopsis thaliana	206	210	1e-52	0.53	0.71	1
04-N22	672	ACJ84968.1	unknown	Medicago truncatula	132	239	2e-61	0.9	0.93	2	sp|A7RWP6	EIF3E_NEMVE Eukaryotic translation initiation factor 3subunit E	Nematostella vectensis	448	130	6e-30	0.54	0.71	2
04-O09	838	XP_002269030.1	PREDICTED: hypothetical protein	Vitis vinifera	720	149	3e-34	0.67	0.76	2	sp|Q39827	SPE1_SOYBN Arginine decarboxylase	Glycine max	692	138	4e-32	0.62	0.74	2
04-O19	469	XP_002280995.1	PREDICTED: hypothetical protein	Vitis vinifera	1850	77	6e-13	0.36	0.52	3
04-P08	818	XP_002279689.1	PREDICTED: hypothetical protein	Vitis vinifera	558	486	e-136	0.86	0.92	2	sp|Q9LR47	IP5P3_ARATH Type I inositol-1,4,5-trisphosphate5-phosphatase CVP2	Arabidopsis thaliana	617	298	4e-80	0.53	0.61	2
05-A01	786	CAO64380.1	unnamed protein product	Vitis vinifera	1582	348	4e-94	0.66	0.74	2
05-A06	754	XP_002311349.1	predicted protein	Populus trichocarpa	480	305	4e-81	0.77	0.9	1	sp|P29251	FOL1_PNECA Folic acid synthesis protein fol1	Pneumocystis carinii	740	135	4e-31	0.43	0.56	1
05-A07	420	XP_002317282.1	predicted protein	Populus trichocarpa	469	163	6e-39	0.77	0.87	1	sp|P07991	OAT_YEAST Ornithine aminotransferase	Saccharomycescerevisiae	424	70.1	4e-12	0.42	0.67	1
05-A16	672	XP_002276038.1	PREDICTED: hypothetical protein	Vitis vinifera	182	218	4e-55	0.62	0.74	1
05-B08	741	XP_002321182.1	predicted protein	Populus trichocarpa	570	470	e-131	0.88	0.94	1	sp|Q84N37	PVIP_PEA OBERON-like protein (Fragment)	Pisum sativu	513	417	e-116	0.78	0.87	1
05-B09	786	XP_002299577.1	predicted protein	Populus trichocarpa	302	177	2e-50	0.82	0.93	1
05-B11	749	XP_002274906.1	PREDICTED: hypothetical protein	Vitis vinifera	855	354	4e-96	0.72	0.79	3	sp|Q9SIU2	NCBP1_ARATH Nuclear cap-binding protein subunit 1	Arabidopsis thaliana	848	348	3e-95	0.67	0.81	3
05-B12	509	XP_002285919.1	PREDICTED: hypothetical protein	Vitis vinifera	206	62.4	2e-08	0.42	0.49	1
05-B14	766	XP_002312340.1	predicted protein	Populus trichocarpa	878	272	2e-71	0.8	0.9	1	sp|Q6P2K6	P4R3A_MOUSE Serine/threonine-protein phosphatase 4regulatory subunit 3A	Mus musculus	820	120	1e-26	0.44	0.61	1
05-B17	847	XP_002267276.1	PREDICTED: hypothetical protein	Vitis vinifera	211	150	2e-34	0.87	0.96	1	sp|Q54NU2	RAB1D_DICDI Ras-related protein Rab-1D	Dictyosteliumdiscoideum	204	116	2e-25	0.69	0.79	1
05-B18	601	EEF37247.1	hypothetical protein RCOM_0553590	Ricinus communis	490	113	1e-23	0.71	0.82	1
05-C01	836	XP_002313079.1	predicted protein	Populus trichocarpa	204	83.6	8e-26	0.6	0.76	1
05-C02	566	XP_002268691.1	PREDICTED: hypothetical protein	Vitis vinifera	164	57.8	5e-07	0.36	0.46	1
05-C03	841	EEF31539.1	conserved hypothetical protein	Ricinus communis	307	334	5e-90	0.79	0.88	2
05-C05	808	XP_002320958.1	predicted protein	Populus trichocarpa	336	269	3e-70	0.81	0.89	3	sp|O15488	GLYG2_HUMAN Glycogenin-2	Homo sapiens	501	58.2	7e-08	0.3	0.45	3
05-C07	736	CAO47305.1	unnamed protein product	Vitis vinifera	433	353	1e-95	0.7	0.83	2	sp|Q75IW1	COBL2_ORYSJ COBRA-like protein 2	Oryza sativa subsp.japonica	458	261	3e-69	0.52	0.69	2
05-C17	769	XP_002279882.1	PREDICTED: hypothetical protein	Vitis vinifera	361	376	e-102	0.9	0.94	3	sp|Q5ZA07	C3H41_ORYSJ E3 ubiquitin-protein ligase makorin	Oryzasativa subsp. japonica	368	338	2e-92	0.81	0.9	3
05-C21	724	XP_002281235.1	PREDICTED: hypothetical protein	Vitis vinifera	660	188	6e-96	0.8	0.89	2	sp|Q9SV13	SUT31_ARATH Sulfate transporter 3.1	Arabidopsisthaliana	658	150	5e-66	0.61	0.81	2
05-D13	502	AAC05642.1	unknown	Pseudomonas marginalis pv. alfalfae	365	319	5e-86	0.97	0.99	2	sp|P45768	YHDY_ECOLI Inner membrane amino-acid ABC transporterpermease protein yhdY	Escherichia coli (strain K12	367	224	3e-58	0.64	0.81	2
05-D15	812	XP_002283301.1	PREDICTED: hypothetical protein	Vitis vinifera	382	194	8e-48	0.5	0.6	2
05-D17	779	XP_002282806.1	PREDICTED: hypothetical protein	Vitis vinifera	557	232	3e-59	0.59	0.68	2
05-D23	831	XP_002263864.1	PREDICTED: hypothetical protein	Vitis vinifera	374	471	e-131	0.85	0.93	3	sp|Q39242	TRXB2_ARATH Thioredoxin reductase 2	Arabidopsisthaliana	383	465	e-130	0.84	0.92	3
05-D24	691	XP_001508660.1	PREDICTED: similar to histone protein Hist2h3c1	Ornithorhynchusanatinus	182	258	3e-67	0.9	0.93	3	sp|P68428	H32_WHEAT Histone H3.2	Triticum aestivum	136	258	3e-68	0.97	0.98	3
05-E19	810	XP_002314240.1	predicted protein	Populus trichocarpa	439	445	e-123	0.9	0.91	3	sp|Q8W207	CSN2_ARATH COP9 signalosome complex subunit 2	Arabidopsis thaliana	439	418	e-116	0.84	0.88	3
05-E22	823	XP_002297945.1	predicted protein	Populus trichocarpa	1041	389	e-106	0.67	0.81	2	sp|C0LGH3	Y5614_ARATH Probable LRR receptor-likeserine/threonine-protein kinase At1g56140	Arabidopsisthaliana	1033	280	7e-75	0.53	0.67	2
05-E23	613	XP_002316911.1	predicted protein	Populus trichocarpa	255	211	3e-53	0.82	0.93	2
05-G09	842	XP_002278314.1	PREDICTED: hypothetical protein	Vitis vinifera	474	424	e-117	0.71	0.82	1	sp|Q9LEY1	SCP35_ARATH Serine carboxypeptidase-like 35	Arabidopsis thaliana	480	398	e-110	0.67	0.8	1
05-G12	844	EEF43722.1	conserved hypothetical protein	Ricinus communis	368	468	e-130	0.81	0.89	3
05-G20	684	XP_002319359.1	hypothetical protein POPTRDRAFT_243090	Populus trichocarpa	237	185	3e-45	0.91	0.93	1	sp|Q9M0I2	EXPB3_ARATH Expansin-B3	Arabidopsis thaliana	264	176	1e-43	0.83	0.94	1
05-H03	752	YP_274711.1	hypothetical protein PSPPH_2515	Pseudomonas syringae pv.phaseolicola 1448A	1164	122	3e-26	0.37	0.55	2
05-I04	847	XP_002269733.1	PREDICTED: hypothetical protein isoform 2	Vitis vinifera	480	496	e-138	0.95	0.98	1	sp|Q9LIA8	UGDH1_ARATH Probable UDP-glucose 6-dehydrogenase 1	Arabidopsis thaliana	480	468	e-131	0.89	0.96	1
05-I09	839	EEF51030.1	conserved hypothetical protein	Ricinus communis	306	245	4e-63	0.78	0.85	2	sp|Q55909	Y305_SYNY3 TVP38/TMEM64 family membrane protein slr0305	Synechocystis sp. (strain ATCC 27184 / PCC 6803 /N-1)	209	53.5	2e-06	0.31	0.47	2
05-K02	820	XP_002302075.1	predicted protein	Populus trichocarpa	237	311	5e-83	0.71	0.78	3	sp|P13089	AUX28_SOYBN Auxin-induced protein AUX28	Glycine ma	243	268	4e-71	0.63	0.7	3
05-K04	936	XP_002328996.1	predicted protein	Populus trichocarpa	411	509	e-142	0.89	0.95	2	sp|Q5ZL42	BZW2_CHICK Basic leucine zipper and W2 domain-containingprotein 2	Gallus gallus	414	154	9e-37	0.29	0.54	2
05-K19	889	ACJ85114.1	unknown	Medicago truncatula	280	179	4e-43	0.67	0.86	2
05-K20	685	XP_002309175.1	predicted protein	Populus trichocarpa	477	225	2e-57	0.68	0.81	3	sp|Q94AL9	AGT22_ARATH Alanine--glyoxylate aminotransferase 2homolog 2, mitochondrial	Arabidopsis thaliana	477	207	4e-53	0.69	0.79	3
05-L08	906	XP_002285526.1	PREDICTED: hypothetical protein isoform 1	Vitis vinifera	638	424	e-117	0.75	0.87	2	sp|A5D7E2	TM9S4_BOVIN Transmembrane 9 superfamily member 4	Bostaurus	642	176	3e-43	0.39	0.57	2
05-L14	284	XP_002270673.1	PREDICTED: hypothetical protein	Vitis vinifera	505	72	2e-11	0.73	0.8	2
05-M01	748	CAN70332.1	hypothetical protein	Vitis vinifera	242	253	2e-65	0.63	0.78	1	sp|B5X3B2	APMAP_SALSA Adipocyte plasma membrane-associated protein	Salmo salar	416	112	2e-24	0.3	0.54	1
05-M07	790	XP_002299266.1	predicted protein	Populus trichocarpa	251	265	4e-69	0.61	0.78	3	sp|Q8W487	YB95_ARATH Uncharacterized protein At2g39795,mitochondrial	Arabidopsis thaliana	250	75.1	5e-13	0.28	0.48	3
05-M23	902	XP_002281041.1	PREDICTED: hypothetical protein	Vitis vinifera	438	292	3e-77	0.59	0.68	1	sp|Q9LX29	ACR4_ARATH Serine/threonine-protein kinase-like proteinACR4	Arabidopsis thaliana	895	147	1e-34	0.49	0.65	1
05-N08	439	EEF36913.1	conserved hypothetical protein	Ricinus communis	84	107	5e-22	0.8	0.93	1
05-N14	671	ABK21138.1	unknown	Picea sitchensis	108	135	4e-30	0.93	1	2	sp|P46301	RS25_SOLLC 40S ribosomal protein S25	Solanumlycopersicum	108	130	8e-30	0.88	1	2
05-N21	831	XP_002272771.1	PREDICTED: hypothetical protein	Vitis vinifera	1324	201	9e-50	0.46	0.59	2
05-O04	233	YP_002870243.1	hypothetical protein PFLU0573	Pseudomonas fluorescens SBW25	337	148	2e-34	0.98	1	2
05-O12	590	XP_002273606.1	PREDICTED: hypothetical protein	Vitis vinifera	992	298	2e-79	0.79	0.9	1	sp|O94258	XPOT_SCHPO Exportin-T	Schizosaccharomyces pombe	978	71.6	3e-12	0.23	0.5	1
05-O13	802	EEF36705.1	conserved hypothetical protein	Ricinus communis	1050	73.9	4e-16	0.8	0.82	1
05-O19	351	XP_002451520.1	hypothetical protein SORBIDRAFT_04g003180	Sorghum bicolor	307	85.5	2e-15	0.88	0.95	1	sp|P15178	SYDC_RAT Aspartyl-tRNA synthetase, cytoplasmic	Rattusnorvegicus	501	68.6	1e-11	0.66	0.85	1
05-O20	781	XP_002326106.1	predicted protein	Populus trichocarpa	324	269	2e-70	0.58	0.69	2	sp|Q9ZR04	CCD61_ARATH Putative cyclin-D6-1	Arabidopsis thalian	302	184	8e-46	0.44	0.61	2
05-P01	798	XP_002314671.1	predicted protein	Populus trichocarpa	261	423	e-116	0.93	0.97	3	sp|Q8GTE3	RS3A_CICAR 40S ribosomal protein S3a	Cicer arietinu	261	411	e-114	0.91	0.96	3
05-P05	882	YP_002871747.1	hypothetical protein PFLU2131	Pseudomonas fluorescens SBW25	64	107	2e-21	0.89	0.94	-3
05-P08	760	ACJ84329.1	unknown	Medicago truncatula	309	286	1e-75	0.71	0.81	3	sp|P52579	IFRH_TOBAC Isoflavone reductase homolog A622	Nicotianatabacum	310	263	1e-69	0.65	0.77	3
05-P10	794	XP_002264497.1	PREDICTED: hypothetical protein	Vitis vinifera	253	290	8e-77	0.62	0.71	3	sp|Q8WNV7	DHRS4_PIG Dehydrogenase/reductase SDR family member 4	Sus scrofa	279	162	3e-39	0.38	0.53	3
06-A01	894	XP_002282774.1	PREDICTED: similar to glucose-6-phosphate isomerase	Vitis vinifera	568	517	e-145	0.87	0.94	1	sp|P34795	G6PI_ARATH Glucose-6-phosphate isomerase, cytosolic	Arabidopsis thaliana	560	504	e-142	0.84	0.93	1
06-A18	741	XP_002307913.1	predicted protein	Populus trichocarpa	514	418	e-115	0.84	0.91	2	sp|Q53196	Y4UB_RHISN Uncharacterized aminotransferase y4uB	Rhizobium sp. (strain NGR234)	467	145	4e-34	0.4	0.57	2
06-A22	510	XP_002313489.1	predicted protein	Populus trichocarpa	173	89.7	9e-17	0.57	0.63	3
06-B07	568	EEF52544.1	conserved hypothetical protein	Ricinus communis	651	198	3e-49	0.86	0.94	3
06-B08	865	XP_002278166.1	PREDICTED: hypothetical protein	Vitis vinifera	662	328	5e-88	0.61	0.78	1	sp|Q9SN39	PP320_ARATH Pentatricopeptide repeat-containing proteinAt4g18750, chloroplastic	Arabidopsis thalian	871	186	2e-46	0.38	0.58	1
06-B11	831	XP_002300771.1	predicted protein	Populus trichocarpa	694	363	8e-99	0.72	0.82	1	sp|Q54HG9	RPN2_DICDI Dolichyl-diphosphooligosaccharide--proteinglycosyltransferase subunit swp1	Dictyosteliumdiscoideum	685	59.7	2e-08	0.24	0.45	1
06-B15	293	XP_002321654.1	predicted protein	Populus trichocarpa	362	75.9	1e-12	0.77	0.86	2	sp|O65039	CYSEP_RICCO Vignain	Ricinus communis	360	73.9	3e-13	0.77	0.84	2
06-B23	817	EEF44477.1	conserved hypothetical protein	Ricinus communis	317	406	e-111	0.8	0.86	3
06-c14	775	XP_002301087.1	predicted protein	Populus trichocarpa	925	404	e-111	0.79	0.85	2
06-c24	750	EEF35601.1	conserved hypothetical protein	Ricinus communis	683	337	5e-91	0.67	0.8	1
06-D08	386	XP_002265204.1	PREDICTED: hypothetical protein	Vitis vinifera	174	160	5e-38	0.74	0.83	2	sp|Q39127	TINY_ARATH Ethylene-responsive transcription factor TINY	Arabidopsis thaliana	218	121	2e-27	0.63	0.76	2
06-D09	278	EEF30533.1	conserved hypothetical protein	Ricinus communis	321	173	6e-42	0.83	0.89	1	sp|Q9VUQ8	DCN1L_DROME DCN1-like protein	Drosophila melanogaste	288	76.3	6e-14	0.47	0.61	1
06-F02	864	XP_002308570.1	predicted protein	Populus trichocarpa	521	373	e-101	0.74	0.79	1	sp|Q38821	2ABA_ARATH Serine/threonine protein phosphatase 2A 55 kDaregulatory subunit B alpha isoform	Arabidopsisthaliana	513	322	3e-87	0.65	0.75	1
06-F03	802	XP_002279809.1	PREDICTED: hypothetical protein	Vitis vinifera	491	103	1e-20	0.34	0.44	1
06-F22	330	XP_002266562.1	PREDICTED: hypothetical protein	Vitis vinifera	480	56.2	1e-06	0.82	0.92	3
06-G05	833	XP_002316296.1	predicted protein	Populus trichocarpa	610	342	2e-92	0.72	0.82	2	sp|Q8Z068	SYM_NOSS1 Methionyl-tRNA synthetase	Nostoc sp. (strainPCC 7120 / UTEX 2576)	530	201	5e-51	0.57	0.75	2
06-G07	574	XP_002315901.1	predicted protein	Populus trichocarpa	255	184	4e-45	0.69	0.74	3	sp|P43394	K502_ACTDE Fruit protein pKIWI502	Actinidia delicios	317	128	3e-29	0.47	0.64	3
06-G10	564	XP_002270339.1	PREDICTED: hypothetical protein	Vitis vinifera	116	119	1e-25	0.72	0.77	2
06-G14	454	XP_002271414.1	PREDICTED: hypothetical protein	Vitis vinifera	423	72.4	1e-11	0.88	0.97	1
06-G16	870	EEF33914.1	conserved hypothetical protein	Ricinus communis	500	485	e-135	0.81	0.87	3
06-H16	733	XP_002331190.1	predicted protein	Populus trichocarpa	1763	247	9e-64	0.64	0.76	1	sp|Q9Z1T6	FYV1_MOUSE 1-phosphatidylinositol-3-phosphate 5-kinase	Mus musculus	2097	72.4	3e-12	0.32	0.48	1
06-H19	354	EEF46251.1	conserved hypothetical protein	Ricinus communis	140	101	2e-20	0.81	0.9	2
06-H23	769	XP_002273792.1	PREDICTED: hypothetical protein	Vitis vinifera	722	305	4e-81	0.7	0.77	3	sp|Q9ZUU9	AB3G_ARATH ABC transporter G family member 3	Arabidopsisthaliana	705	246	9e-65	0.57	0.7	3
06-I12	849	XP_002278760.1	PREDICTED: hypothetical protein	Vitis vinifera	351	241	5e-62	0.53	0.68	2	sp|O23006	LYM2_ARATH LysM domain-containing GPI-anchored protein 2	Arabidopsis thaliana	350	222	2e-57	0.5	0.68	2
06-I15	799	EEF45550.1	conserved hypothetical protein	Ricinus communis	128	102	4e-20	0.48	0.56	1
06-J05	804	XP_002282538.1	PREDICTED: hypothetical protein	Vitis vinifera	644	327	8e-88	0.63	0.66	1	sp|O04235	SSRP1_VICFA FACT complex subunit SSRP1	Vicia fab	642	310	7e-84	0.59	0.66	1
06-J23	360	XP_002488965.1	hypothetical protein SORBIDRAFT_1138s002030	Sorghum bicolor	98	126	8e-28	0.82	0.85	3
06-K01	846	CAO24165.1	unnamed protein product	Vitis vinifera	472	347	1e-93	0.71	0.82	1	sp|Q6K991	PHO12_ORYSJ Phosphate transporter PHO1-2	Oryza sativasubsp. japonica	815	62	5e-09	0.28	0.47	1
06-K11	749	XP_002266312.1	PREDICTED: hypothetical protein	Vitis vinifera	577	349	2e-94	0.77	0.86	3	sp|Q54Z26	GLYC1_DICDI Serine hydroxymethyltransferase 1	Dictyostelium discoideum	457	203	2e-52	0.52	0.71	3
06-K14	417	EEF45303.1	hypothetical protein RCOM_0912170	Ricinus communis	1604	99	1e-19	0.56	0.67	1
06-L08	340	CAN67869.1	hypothetical protein	Vitis vinifera	505	147	4e-34	0.81	0.91	1	sp|Q39231	SUC2_ARATH Sucrose transport protein SUC2	Arabidopsisthaliana	512	136	4e-32	0.72	0.84	1
06-L12	726	XP_002309810.1	predicted protein	Populus trichocarpa	988	160	8e-38	0.66	0.8	2
06-L13	416	XP_002264393.1	PREDICTED: hypothetical protein	Vitis vinifera	431	232	1e-59	0.81	0.87	3
06-M04	686	EEF28932.1	conserved hypothetical protein	Ricinus communis	392	200	1e-49	0.61	0.7	1
06-P03	796	XP_002322237.1	predicted protein	Populus trichocarpa	248	324	5e-87	0.88	0.95	2	sp|Q08480	KAD2_ORYSJ Adenylate kinase B	Oryza sativa subsp.japonica	243	318	4e-86	0.85	0.95	2
06-P24	395	XP_002276824.1	PREDICTED: hypothetical protein	Vitis vinifera	981	98.2	2e-19	0.84	0.91	3	sp|Q7X923	SPT16_ORYSJ FACT complex subunit SPT16	Oryza sativasubsp. japonica	1056	73.6	4e-13	0.64	0.72	3
07-A05	848	XP_002324510.1	predicted protein	Populus trichocarpa	431	422	e-116	0.91	0.97	3	sp|Q9M0B6	GAE1_ARATH UDP-glucuronate 4-epimerase 1	Arabidopsisthaliana	429	406	e-112	0.89	0.95	3
07-A07	178	YP_002873339.1	hypothetical protein PFLU3785	Pseudomonas fluorescens SBW25	223	89.4	1e-16	0.97	0.97	2
07-A12	870	XP_002320420.1	predicted protein	Populus trichocarpa	912	260	1e-67	0.65	0.79	2	sp|Q6P4L9	NFRKB_XENTR Nuclear factor related to kappa-B-bindingprotein	Xenopus tropicalis	1265	69.3	3e-11	0.35	0.57	2
07-A14	707	XP_002306265.1	predicted protein	Populus trichocarpa	548	240	8e-62	0.55	0.62	2	sp|Q0WP85	PP150_ARATH Pentatricopeptide repeat-containing proteinAt2g13420, mitochondrial	Arabidopsis thalian	509	224	6e-58	0.57	0.71	2
07-A22	859	CAO38953.1	unnamed protein product	Vitis vinifera	399	304	8e-81	0.59	0.63	3
07-B13	550	EAZ20864.1	hypothetical protein OsJ_36503	Oryza sativa Japonica Group	160	94.4	5e-18	0.95	0.95	2	sp|P52885	SAR1_TOBAC GTP-binding protein SAR1	Nicotiana tabacu	198	92.8	1e-18	0.93	0.95	2
07-B19	695	XP_002262994.1	PREDICTED: hypothetical protein	Vitis vinifera	126	241	3e-62	0.88	0.96	1	sp|Q8L8Q8	Y5486_ARATH Uncharacterized protein At5g64816	Arabidopsis thaliana	130	233	7e-61	0.84	0.96	1
07-C11	855	XP_002282473.1	PREDICTED: hypothetical protein	Vitis vinifera	555	354	5e-96	0.69	0.76	2	sp|Q5R684	UBQL1_PONAB Ubiquilin-1	Pongo abelii	589	177	1e-43	0.39	0.54	2
07-C21	439	XP_002276745.1	PREDICTED: hypothetical protein	Vitis vinifera	648	74.7	3e-12	0.83	0.88	3
07-D06	661	EEF49961.1	conserved hypothetical protein	Ricinus communis	264	268	3e-70	0.72	0.82	2
07-D17	843	XP_002318311.1	predicted protein	Populus trichocarpa	316	291	4e-77	0.79	0.86	3	sp|Q9C9X3	ANXD5_ARATH Annexin D5	Arabidopsis thaliana	316	219	2e-56	0.58	0.75	3
07-D20	781	XP_002282116.1	PREDICTED: hypothetical protein	Vitis vinifera	331	409	e-112	0.76	0.87	3	sp|Q8K4F5	ABHDB_MOUSE Abhydrolase domain-containing protein 11	Mus musculus	307	61.6	6e-09	0.24	0.43	3
07-E02	675	XP_002265811.1	PREDICTED: hypothetical protein	Vitis vinifera	800	311	3e-83	0.94	0.99	3	sp|Q9FWR2	AVPX_ARATH Pyrophosphate-energized membrane proton pump 3	Arabidopsis thaliana	802	304	4e-82	0.92	0.97	3
07-E03	872	XP_002273700.1	PREDICTED: hypothetical protein	Vitis vinifera	209	296	2e-78	0.7	0.8	3	sp|Q9M392	RTNLL_ARATH Reticulon-like protein B12	Arabidopsisthaliana	203	189	3e-47	0.49	0.66	3
07-E05	844	EEC79285.1	hypothetical protein OsI_20087	Oryza sativa Indica Group	216	71.6	9e-11	0.34	0.52	-1
07-E11	627	ABA46758.1	unknown	Solanum tuberosum	130	260	5e-68	0.99	1	3	sp|P42798	R15A1_ARATH 40S ribosomal protein S15a-1	Arabidopsisthaliana	130	260	6e-69	0.98	1	3
07-E17	848	XP_002279978.1	PREDICTED: hypothetical protein	Vitis vinifera	526	449	e-124	0.81	0.9	1	sp|O60113	YG64_SCHPO Uncharacterized amino-acid permease C15C4.04c	Schizosaccharomyces pombe	542	138	4e-32	0.33	0.52	1
07-F01	857	EEF47057.1	conserved hypothetical protein	Ricinus communis	1899	400	e-110	0.69	0.84	3	sp|Q8N3P4	VPS8_HUMAN Vacuolar protein sorting-associated protein 8homolog	Homo sapiens	1428	90.9	1e-17	0.24	0.44	3
07-F10	828	XP_002304373.1	predicted protein	Populus trichocarpa	453	481	e-134	0.83	0.92	1	sp|Q6Z8C8	CDKF4_ORYSJ Cyclin-dependent kinase F-4	Oryza sativasubsp. japonica	459	414	e-115	0.71	0.84	1
07-G15	875	YP_002874077.1	hypothetical protein PFLU4550	Pseudomonas fluorescens SBW25	273	202	4e-50	0.57	0.6	-3	sp|P50466	AER_ECOLI Aerotaxis receptor	Escherichia coli (strainK12)	506	73.6	2e-12	0.47	0.63	-3
07-G16	891	XP_002300416.1	predicted protein	Populus trichocarpa	413	111	8e-23	0.4	0.52	2
07-G19	779	XP_002302714.1	predicted protein	Populus trichocarpa	342	94	1e-17	0.81	0.89	2
07-H14	500	EEF45450.1	conserved hypothetical protein	Ricinus communis	86	112	1e-23	0.69	0.79	2
07-I02	645	XP_002302153.1	predicted protein	Populus trichocarpa	154	266	1e-69	0.89	0.89	2	sp|P0C031	RUB2_ORYSJ Ubiquitin-NEDD8-like protein RUB2	Oryzasativa subsp. japonica	153	261	3e-69	0.89	0.9	2
07-I05	729	XP_002309627.1	predicted protein	Populus trichocarpa	437	106	2e-21	0.41	0.53	3
07-J04	887	XP_002307594.1	predicted protein	Populus trichocarpa	440	418	e-115	0.76	0.85	3	sp|Q54UI3	WDR4_DICDI tRNA (guanine-N(7)-)-methyltransferase subunitWDR4	Dictyostelium discoideum	467	99.4	3e-20	0.27	0.51	3
07-J10	862	EEF37853.1	conserved hypothetical protein	Ricinus communis	484	418	e-115	0.83	0.9	1
07-J11	626	ABK92961.1	unknown	Populus trichocarpa	384	78.2	5e-13	0.45	0.56	2	sp|O82199	C3H20_ARATH Zinc finger CCCH domain-containing protein 20	Arabidopsis thaliana	359	65.5	3e-10	0.55	0.71	2
07-K01	848	EEF35044.1	conserved hypothetical protein	Ricinus communis	3206	358	4e-97	0.82	0.9	2	sp|Q54U63	LVSC_DICDI BEACH domain-containing protein lvsC	Dictyostelium discoideum	2491	130	9e-30	0.41	0.62	2
07-K02	771	XP_002281756.1	PREDICTED: hypothetical protein	Vitis vinifera	301	183	2e-44	0.83	0.85	3	sp|Q8BL97	SRSF7_MOUSE Serine/arginine-rich splicing factor 7	Musmusculus	267	53.5	2e-06	0.41	0.54	3
07-K04	361	YP_784125.1	hypothetical protein PehoCp099	Pelargonium x hortorum	188	143	6e-33	0.89	0.96	1	sp|Q2L952	NU1C_GOSHI NAD(P)H-quinone oxidoreductase subunit 1,chloroplastic	Gossypium hirsutum	363	142	5e-34	0.98	0.98	1
07-K10	874	XP_002267920.1	PREDICTED: hypothetical protein	Vitis vinifera	463	432	e-119	0.84	0.92	2	sp|Q93WX6	NFS2_ARATH Cysteine desulfurase 2, chloroplastic	Arabidopsis thaliana	463	411	e-114	0.81	0.89	2
07-K15	293	EEF32491.1	conserved hypothetical protein	Ricinus communis	231	57	6e-07	0.75	0.81	1
07-K18	438	CAO21709.1	unnamed protein product	Vitis vinifera	151	177	2e-44	0.9	0.91	1	sp|O22582	H2B_GOSHI Histone H2B	Gossypium hirsutum	147	176	3e-44	0.89	0.91	1
07-L05	642	XP_002284357.1	PREDICTED: hypothetical protein	Vitis vinifera	146	171	5e-41	1	1	3	sp|O22582	H2B_GOSHI Histone H2B	Gossypium hirsutum	147	171	4e-42	1	1	3
07-L09	671	EEF34491.1	conserved hypothetical protein	Ricinus communis	868	393	e-108	0.84	0.89	1
07-L14	877	XP_002280677.1	PREDICTED: hypothetical protein	Vitis vinifera	517	336	2e-90	0.74	0.85	1	sp|O61967	LAP1_CAEEL Protein lap1	Caenorhabditis elegan	699	93.2	2e-18	0.39	0.53	1
07-L17	905	XP_002318273.1	predicted protein	Populus trichocarpa	345	255	5e-66	0.58	0.69	3	sp|Q9S7C9	ESCA_ARATH Putative DNA-binding protein ESCAROLA	Arabidopsis thaliana	311	60.5	2e-08	0.37	0.54	3
07-M11	793	XP_002266630.1	PREDICTED: hypothetical protein	Vitis vinifera	388	442	e-122	0.92	0.97	2	sp|Q6D2F1	ARNA_ERWCT Bifunctional polymyxin resistance protein ArnA	Erwinia carotovora subsp. atroseptica	673	160	9e-39	0.41	0.57	2
07-M12	851	XP_002313206.1	predicted protein	Populus trichocarpa	323	314	8e-84	0.89	0.94	1	sp|P46336	IOLS_BACSU Protein IolS	Bacillus subtilis	310	92	5e-18	0.33	0.57	1
07-N03	306	XP_002280632.1	PREDICTED: hypothetical protein	Vitis vinifera	156	80.1	7e-14	0.92	0.95	2	sp|P29830	HS176_ARATH 17.6 kDa class II heat shock protein	Arabidopsis thaliana	155	77.4	3e-14	0.83	0.95	2
07-N15	246	YP_001629046.1	hypothetical protein Bpet0443	Bordetella petrii DSM 12804	338	140	5e-32	0.85	0.91	3	sp|A9I0N5	Y443_BORPD UPF0042 nucleotide-binding protein Bpet0443	Bordetella petrii (strain ATCC BAA-461 / DSM 12804 /CCUG 43448)	290	140	3e-33	0.85	0.91	3
07-N17	663	ACJ85468.1	unknown	Medicago truncatula	278	309	2e-82	0.78	0.88	1	sp|P46513	CAH2_FLALI Carbonic anhydrase 2 (Fragment)	Flaverialinearis	190	301	3e-81	0.8	0.87	1
07-N24	840	EEF52308.1	conserved hypothetical protein	Ricinus communis	351	207	1e-51	0.57	0.72	2
07-O03	672	EEF33366.1	conserved hypothetical protein	Ricinus communis	468	270	8e-71	0.6	0.72	3	sp|Q94CC0	Y5994_ARATH Uncharacterized protein At5g49945	Arabidopsis thaliana	480	244	5e-64	0.56	0.63	3
07-O08	849	EEF39742.1	protein with unknown function	Ricinus communis	443	450	e-125	0.85	0.93	3	sp|P21856	GDIA_BOVIN Rab GDP dissociation inhibitor alpha	Bostaurus	447	291	4e-78	0.56	0.74	3
07-O15	757	XP_002301299.1	predicted protein	Populus trichocarpa	201	272	2e-71	0.81	0.89	3
07-P09	703	EEF47193.1	conserved hypothetical protein	Ricinus communis	658	247	6e-64	0.57	0.71	2
07-P12	662	XP_002301850.1	predicted protein	Populus trichocarpa	108	124	5e-27	0.64	0.76	2	sp|O64497	TO221_ARATH Mitochondrial import receptor subunit TOM22homolog 1	Arabidopsis thaliana	94	96.7	1e-19	0.51	0.72	2
07-P16	812	XP_002316764.1	predicted protein	Populus trichocarpa	217	307	9e-82	0.74	0.83	1	sp|Q6BZY4	TIM22_YARLI Mitochondrial import inner membranetranslocase subunit TIM22	Yarrowia lipolytic	185	61.2	8e-09	0.4	0.51	1
08-A02	859	ACJ86227.1	unknown	Medicago truncatula	171	61.2	5e-17	0.38	0.54	2
08-A03	713	XP_002285549.1	PREDICTED: hypothetical protein	Vitis vinifera	357	380	e-104	0.8	0.89	3	sp|O81716	P2C21_ARATH Probable protein phosphatase 2C 21	Arabidopsis thaliana	355	374	e-103	0.77	0.88	3
08-A06	794	XP_002297785.1	predicted protein	Populus trichocarpa	858	325	4e-87	0.6	0.78	1
08-A07	624	CAN79495.1	hypothetical protein	Vitis vinifera	338	138	3e-31	0.43	0.51	3	sp|Q9M2U1	DOF36_ARATH Dof zinc finger protein DOF3.6	Arabidopsisthaliana	323	77	9e-14	0.3	0.41	3
08-A13	851	XP_002284844.1	PREDICTED: hypothetical protein	Vitis vinifera	476	266	1e-69	0.41	0.59	3	sp|Q7XU38	C87A3_ORYSJ Cytochrome P450 87A3	Oryza sativa subsp.japonica	514	186	1e-46	0.35	0.53	3
08-B02	455	XP_002307661.1	predicted protein	Populus trichocarpa	201	65.9	1e-09	0.46	0.55	-2
08-B20	837	XP_002263664.1	PREDICTED: hypothetical protein	Vitis vinifera	458	451	e-125	0.78	0.91	1	sp|P16157	ANK1_HUMAN Ankyrin-1	Homo sapiens	1881	129	3e-29	0.37	0.53	1
08-B21	879	XP_002311534.1	predicted protein	Populus trichocarpa	375	397	e-109	0.77	0.85	3	sp|P49420	DHAS_PROMA Aspartate-semialdehyde dehydrogenase	Prochlorococcus marinus	343	193	1e-48	0.45	0.64	3
08-C03	810	ABK96222.1	unknown	Populus trichocarpa x Populus deltoides	338	408	e-112	0.82	0.89	3	sp|P09094	G3PC_TOBAC Glyceraldehyde-3-phosphate dehydrogenase,cytosolic (Fragment)	Nicotiana tabacum	326	403	e-112	0.8	0.9	3
08-C06	593	XP_002279025.1	PREDICTED: hypothetical protein	Vitis vinifera	142	285	1e-75	0.98	1	3	sp|P46297	RS23_FRAAN 40S ribosomal protein S23	Fragaria ananass	142	280	6e-75	0.96	0.98	3
08-C14	594	XP_002271506.1	PREDICTED: hypothetical protein	Vitis vinifera	138	167	7e-40	0.7	0.79	2	sp|O65759	H2AX_CICAR Histone H2AX	Cicer arietinum	139	162	1e-39	0.68	0.78	2
08-D03	597	CAO64387.1	unnamed protein product	Vitis vinifera	102	122	2e-26	0.66	0.8	3
08-D11	880	XP_002280601.1	PREDICTED: hypothetical protein	Vitis vinifera	417	278	7e-73	0.68	0.79	2	sp|O60176	YG41_SCHPO Uncharacterized RNA-binding protein C23E6.01c	Schizosaccharomyces pombe	473	134	6e-31	0.45	0.58	2
08-D13	836	XP_002298027.1	predicted protein	Populus trichocarpa	453	268	4e-70	0.58	0.63	3	sp|Q9SRE5	Y1666_ARATH Uncharacterized protein At1g76660	Arabidopsis thaliana	431	124	8e-28	0.44	0.56	3
08-D14	399	XP_002281426.1	PREDICTED: hypothetical protein	Vitis vinifera	946	55.1	2e-06	0.48	0.52	2	sp|O49160	EIF3C_ARATH Eukaryotic translation initiation factor 3subunit C	Arabidopsis thaliana	900	54.7	2e-07	0.64	0.74	2
08-D22	774	XP_002276533.1	PREDICTED: hypothetical protein	Vitis vinifera	567	404	e-111	0.79	0.9	2	sp|Q00594	ALKK_PSEOL Medium-chain-fatty-acid--CoA ligase	Pseudomonas oleovorans	546	89.7	2e-17	0.31	0.48	2
08-D23	789	XP_002303094.1	predicted protein	Populus trichocarpa	1426	251	5e-65	0.61	0.74	2
08-E01	818	EEF38840.1	conserved hypothetical protein	Ricinus communis	299	257	8e-67	0.52	0.69	3
08-E04	627	XP_002263960.1	PREDICTED: hypothetical protein	Vitis vinifera	432	307	4e-82	0.8	0.89	1	sp|Q9FZ45	Y1686_ARATH Uncharacterized membrane protein At1g16860	Arabidopsis thaliana	474	231	2e-60	0.59	0.75	1
08-E10	865	XP_002311619.1	predicted protein	Populus trichocarpa	572	447	e-124	0.78	0.89	2	sp|P22953	HSP71_ARATH Heat shock cognate 70 kDa protein 1	Arabidopsis thaliana	651	197	8e-50	0.38	0.58	2
08-E12	824	XP_002298707.1	predicted protein	Populus trichocarpa	552	306	2e-81	0.82	0.9	2	sp|P47924	RIBBA_ARATH Riboflavin biosynthesis protein ribBA,chloroplastic	Arabidopsis thaliana	543	296	1e-79	0.9	0.94	2
08-E13	741	XP_002325070.1	predicted protein	Populus trichocarpa	648	318	3e-85	0.63	0.79	3
08-E17	404	XP_002302834.1	predicted protein	Populus trichocarpa	650	237	3e-61	0.86	0.9	3	sp|Q5RDY2	TM9S4_PONAB Transmembrane 9 superfamily member 4	Pongoabelii	642	89	9e-18	0.39	0.57	3
08-E18	858	XP_002275678.1	PREDICTED: hypothetical protein	Vitis vinifera	581	416	e-114	0.67	0.81	2	sp|Q40588	ASO_TOBAC L-ascorbate oxidase	Nicotiana tabacum	578	406	e-113	0.66	0.79	2
08-F03	845	XP_002315675.1	predicted protein	Populus trichocarpa	481	534	e-150	0.91	0.97	1	sp|P34106	ALA2_PANMI Alanine aminotransferase 2	Panicummiliaceum	482	315	2e-85	0.54	0.71	1
08-F15	843	XP_002304373.1	predicted protein	Populus trichocarpa	453	531	e-149	0.9	0.95	2	sp|Q6Z8C8	CDKF4_ORYSJ Cyclin-dependent kinase F-4	Oryza sativasubsp. japonica	459	466	e-131	0.77	0.88	2
08-F22	717	XP_002315252.1	predicted protein	Populus trichocarpa	123	220	1e-55	0.94	0.96	1	sp|Q9M5L0	RL35_EUPES 60S ribosomal protein L35	Euphorbia esul	123	216	1e-55	0.93	0.95	1
08-G07	794	XP_002279687.1	PREDICTED: hypothetical protein	Vitis vinifera	364	419	e-115	0.84	0.88	1	sp|Q6IR61	NIT2A_XENLA Omega-amidase NIT2-A	Xenopus laevi	276	265	3e-70	0.6	0.71	1
08-G13	835	XP_002277373.1	PREDICTED: hypothetical protein	Vitis vinifera	233	260	1e-67	0.76	0.87	1	sp|Q55FA4	RPA43_DICDI Probable DNA-directed RNA polymerase Isubunit RPA43	Dictyostelium discoideum	356	65.1	6e-10	0.32	0.48	1
08-G16	733	XP_002272974.1	PREDICTED: hypothetical protein	Vitis vinifera	364	217	1e-54	0.62	0.79	1
08-H21	803	XP_002285871.1	PREDICTED: similar to PBC1 (20S proteasome beta subunit C1);peptidase isoform 1	Vitis vinifera	204	389	e-106	0.93	0.97	3	sp|Q9XI05	PSB3A_ARATH Proteasome subunit beta type-3-A	Arabidopsis thaliana	204	385	e-106	0.91	0.97	3
08-H22	518	XP_002309247.1	predicted protein	Populus trichocarpa	644	99.4	1e-19	0.63	0.68	-2
08-I01	742	EEF51268.1	conserved hypothetical protein	Ricinus communis	260	262	2e-68	0.61	0.75	1	sp|Q9SUT9	RTNLB_ARATH Reticulon-like protein B2	Arabidopsisthaliana	271	260	6e-69	0.59	0.78	1
08-I02	606	XP_002283588.1	PREDICTED: hypothetical protein	Vitis vinifera	396	191	3e-47	0.71	0.78	2	sp|Q6H543	IAA7_ORYSJ Auxin-responsive protein IAA7	Oryza sativasubsp. japonica	300	156	8e-38	0.69	0.81	2
08-I05	377	YP_002873738.1	hypothetical protein PFLU4190	Pseudomonas fluorescens SBW25	853	232	1e-59	0.96	1	-3
08-I06	769	XP_002284229.1	PREDICTED: hypothetical protein	Vitis vinifera	488	266	2e-69	0.73	0.85	2	sp|Q9FYG3	PLST2_ARATH Probable plastidic glucose transporter 2	Arabidopsis thaliana	493	239	2e-62	0.68	0.82	2
08-I07	301	CAO21328.1	unnamed protein product	Vitis vinifera	364	54.3	4e-06	0.57	0.65	2
08-I22	646	YP_791759.1	hypothetical protein PA14_45100	Pseudomonas aeruginosa UCBPP-PA14	551	228	3e-58	0.54	0.71	-3	sp|O44400	F37C4_CAEEL Protein F37C4.5	Caenorhabditis elegan	556	71.2	5e-12	0.23	0.43	-3
08-I23	752	XP_002306492.1	predicted protein	Populus trichocarpa	517	410	e-125	0.92	0.97	1	sp|Q8BHJ5	TBL1R_MOUSE F-box-like/WD repeat-containing proteinTBL1XR1	Mus musculus	514	299	8e-85	0.64	0.81	1
08-J09	347	XP_002283853.1	PREDICTED: hypothetical protein	Vitis vinifera	37	71.6	2e-11	0.86	0.91	2
08-J24	798	XP_002271392.1	PREDICTED: hypothetical protein	Vitis vinifera	605	429	e-118	0.97	0.99	3	sp|Q8LPJ4	AB2E_ARATH ABC transporter E family member 2	Arabidopsis thaliana	605	412	e-114	0.93	0.97	3
08-K01	761	XP_002264666.1	PREDICTED: hypothetical protein	Vitis vinifera	1085	482	e-134	0.89	0.97	2	sp|Q5R614	SYLC_PONAB Leucyl-tRNA synthetase, cytoplasmic	Pongoabelii	1176	335	2e-91	0.6	0.8	2
08-K08	720	XP_002280902.1	PREDICTED: hypothetical protein	Vitis vinifera	526	194	7e-48	0.51	0.66	1
08-K17	524	XP_002309824.1	predicted protein	Populus trichocarpa	140	176	6e-43	0.76	0.82	1	sp|Q9Y3E0	GOT1B_HUMAN Vesicle transport protein GOT1B	Homosapiens	138	97.4	4e-20	0.43	0.6	1
08-K18	749	CAN64534.1	hypothetical protein	Vitis vinifera	461	343	7e-93	0.75	0.88	3	sp|Q2XWK0	SVOP_XENLA Synaptic vesicle 2-related protein	Xenopuslaevis	548	136	1e-31	0.35	0.53	3
08-K21	835	XP_002273136.1	PREDICTED: hypothetical protein	Vitis vinifera	291	271	4e-71	0.6	0.74	1	sp|Q8GXV7	CRR56_ARATH Cysteine-rich repeat secretory protein 56	Arabidopsis thaliana	303	223	2e-57	0.53	0.66	1
08-K22	782	XP_002311275.1	predicted protein	Populus trichocarpa	587	327	6e-88	0.94	0.97	1	sp|Q9FIV6	DGP10_ARATH Protease Do-like 10, mitochondrial	Arabidopsis thaliana	586	303	7e-82	0.86	0.94	1
08-L15	781	XP_002308212.1	predicted protein	Populus trichocarpa	476	367	e-100	0.7	0.78	3	sp|Q9SND9	Y3028_ARATH Uncharacterized acetyltransferase At3g50280	Arabidopsis thaliana	443	102	4e-21	0.28	0.44	3
08-L24	798	EEF32451.1	conserved hypothetical protein	Ricinus communis	845	258	4e-67	0.69	0.79	1
08-M03	772	XP_002304437.1	predicted protein	Populus trichocarpa	266	280	1e-73	0.63	0.72	3
08-M12	100	XP_002305035.1	predicted protein	Populus trichocarpa	425	63.2	8e-09	0.9	0.9	2
08-M13	788	XP_002269584.1	PREDICTED: hypothetical protein	Vitis vinifera	619	313	2e-83	0.64	0.74	3	sp|Q9ZPI1	SYK_ARATH Lysyl-tRNA synthetase	Arabidopsis thalian	626	276	1e-73	0.71	0.83	3
08-M14	770	XP_002263965.1	PREDICTED: hypothetical protein	Vitis vinifera	524	446	e-123	0.88	0.94	2	sp|P24465	C71A1_PERAE Cytochrome P450 71A1	Persea american	502	202	2e-51	0.43	0.62	2
08-M19	636	XP_002271076.1	PREDICTED: hypothetical protein	Vitis vinifera	263	165	3e-39	0.68	0.77	1
08-M21	549	XP_002300992.1	predicted protein	Populus trichocarpa	116	135	1e-30	0.6	0.72	1
08-N02	794	XP_002303297.1	predicted protein	Populus trichocarpa	349	297	9e-79	0.59	0.69	1	sp|Q9ZSY8	IAA27_ARATH Auxin-responsive protein IAA27	Arabidopsisthaliana	305	182	2e-45	0.5	0.6	1
08-N05	517	XP_002303971.1	predicted protein	Populus trichocarpa	94	94	5e-18	0.47	0.62	2
08-N06	775	XP_002276870.1	PREDICTED: hypothetical protein	Vitis vinifera	477	410	e-113	0.74	0.87	1	sp|Q9Z2L6	MINP1_MOUSE Multiple inositol polyphosphate phosphatase 1	Mus musculus	481	83.6	1e-15	0.23	0.46	1
08-N16	683	XP_002269414.1	PREDICTED: hypothetical protein	Vitis vinifera	675	273	1e-71	0.94	0.97	3	sp|Q0VA16	WDR70_XENTR WD repeat-containing protein 70	Xenopustropicalis	622	123	1e-27	0.48	0.64	3
08-N20	906	XP_002305910.1	predicted protein	Populus trichocarpa	268	380	e-103	0.69	0.81	1	sp|Q93VG8	U326_ARATH UPF0326 protein At4g17486	Arabidopsisthaliana	224	78.2	7e-14	0.38	0.61	1
08-N21	483	XP_002312644.1	predicted protein	Populus trichocarpa	328	152	1e-35	0.8	0.95	1	sp|Q0J8A4	G3PC_ORYSJ Glyceraldehyde-3-phosphate dehydrogenase,cytosolic	Oryza sativa subsp. japonica	337	148	2e-35	0.81	0.93	1
08-O03	466	YP_002090933.1	hypothetical protein PA2G_05797	Pseudomonas aeruginosa 2192	803	201	2e-50	0.67	0.77	-3	sp|P35818	GSPD_PSEAE General secretion pathway protein D	Pseudomonas aeruginosa	658	87	4e-17	0.3	0.5	-3
08-O09	805	EEF32348.1	conserved hypothetical protein	Ricinus communis	552	501	e-140	0.81	0.85	2	sp|Q8W486	Y1491_ARATH DUF246 domain-containing protein At1g04910	Arabidopsis thaliana	519	149	3e-35	0.36	0.58	2
08-O15	772	XP_002282932.1	PREDICTED: hypothetical protein	Vitis vinifera	504	311	3e-83	0.85	0.92	1	sp|Q9LYT3	TT12_ARATH Protein TRANSPARENT TESTA 12	Arabidopsisthaliana	507	258	4e-68	0.68	0.84	1
08-O21	854	XP_002278824.1	PREDICTED: hypothetical protein	Vitis vinifera	315	310	1e-82	0.6	0.69	1	sp|Q56XR0	BH071_ARATH Transcription factor bHLH71	Arabidopsisthaliana	327	201	5e-51	0.44	0.55	1
08-P05	408	YP_299149.1	hypothetical protein Reut_B4957	Ralstonia eutropha JMP134	331	182	1e-44	0.72	0.86	-2	sp|P0A177	YCLC_PSEPU UPF0065 protein in clcB-clcD intergenic region	Pseudomonas putida	329	105	9e-23	0.45	0.63	-2
08-P09	760	XP_002277910.1	PREDICTED: hypothetical protein	Vitis vinifera	497	280	1e-73	0.61	0.73	2	sp|Q5ZKQ3	RPAP3_CHICK RNA polymerase II-associated protein 3	Gallus gallus	665	118	5e-26	0.5	0.7	2
08-P15	768	NP_197560.2	unknown protein	Arabidopsis thaliana	532	303	9e-81	0.59	0.78	1	sp|Q91YK2	RRP1B_MOUSE Ribosomal RNA processing protein 1 homolog B	Mus musculus	724	117	7e-26	0.35	0.56	1
08-P17	810	CAO49348.1	unnamed protein product	Vitis vinifera	519	146	2e-33	0.61	0.62	1	sp|Q56ZZ7	PLST4_ARATH Plastidic glucose transporter 4	Arabidopsis thaliana	546	140	1e-32	0.61	0.62	1
08-P21	554	XP_002319533.1	predicted protein	Populus trichocarpa	422	137	4e-31	0.92	0.96	3	sp|Q20938	PS11A_CAEEL Probable 26S proteasome regulatory subunitrpn-6.1	Caenorhabditis elegans	438	54.7	1e-13	0.39	0.57	3
09-A08	689	XP_002300770.1	predicted protein	Populus trichocarpa	64	129	3e-28	0.93	0.96	2	sp|Q93XX8	NOP10_ARATH H/ACA ribonucleoprotein complex subunit3-like protein	Arabidopsis thaliana	64	114	8e-25	0.82	0.9	2
09-A15	487	XP_002305928.1	predicted protein	Populus trichocarpa	414	333	4e-90	0.98	1	1	sp|P50218	IDHC_TOBAC Isocitrate dehydrogenase [NADP]	Nicotianatabacum	415	326	5e-89	0.95	0.98	1
09-A21	411	EEF49894.1	conserved hypothetical protein	Ricinus communis	95	63.2	8e-09	0.5	0.6	3
09-B01	796	XP_972155.1	PREDICTED: similar to AGAP000928-PA	Tribolium castaneum	281	137	1e-30	0.3	0.53	1	sp|Q8HXW8	PEX10_MACFA Peroxisome biogenesis factor 10	Macacafascicularis	326	100	1e-20	0.27	0.4	1
09-B10	800	XP_002323031.1	predicted protein	Populus trichocarpa	949	196	2e-48	0.45	0.61	3
09-D15	615	EEF42324.1	conserved hypothetical protein	Ricinus communis	133	155	2e-36	0.63	0.74	2
09-D18	617	XP_002285922.1	PREDICTED: hypothetical protein	Vitis vinifera	69	112	2e-23	0.88	0.94	3
09-E08	837	XP_002268080.1	PREDICTED: hypothetical protein	Vitis vinifera	330	278	5e-73	0.63	0.69	1	sp|P28643	FABG_CUPLA 3-oxoacyl-[acyl-carrier-protein] reductase,chloroplastic	Cuphea lanceolata	320	251	4e-66	0.6	0.66	1
09-E09	667	XP_002326652.1	predicted protein	Populus trichocarpa	281	332	2e-89	0.78	0.9	3
09-E15	632	XP_002322093.1	predicted protein	Populus trichocarpa	548	103	1e-20	0.52	0.63	3	sp|Q9LV37	MPK9_ARATH Mitogen-activated protein kinase 9	Arabidopsis thaliana	510	91.7	4e-18	0.48	0.64	3
09-E18	599	XP_002328339.1	predicted protein	Populus trichocarpa	201	238	2e-61	0.69	0.78	3	sp|O24542	AX22D_VIGRR Auxin-induced protein 22D	Vigna radiatavar. radiata	193	211	4e-54	0.66	0.76	3
09-F05	806	XP_002312895.1	predicted protein	Populus trichocarpa	168	298	5e-79	0.84	0.91	3	sp|O22165	RLP24_ARATH Probable ribosome biogenesis protein RLP24	Arabidopsis thaliana	159	243	1e-63	0.69	0.82	3
09-F12	840	CAO46365.1	unnamed protein product	Vitis vinifera	367	70.9	1e-10	0.66	0.74	-3
09-F13	748	XP_002302029.1	predicted protein	Populus trichocarpa	381	347	6e-94	0.71	0.79	3	sp|O31544	YFJP_BACSU Putative DNA-3-methyladenine glycosylase yfjP	Bacillus subtilis	287	86.3	2e-16	0.25	0.46	3
09-F21	634	XP_002281484.1	PREDICTED: hypothetical protein	Vitis vinifera	458	254	4e-66	0.92	0.97	1	sp|O50046	TRPB_CAMAC Tryptophan synthase beta chain 2,chloroplastic	Camptotheca acuminata	466	249	1e-65	0.9	0.96	1
09-G13	716	EEF35516.1	conserved hypothetical protein	Ricinus communis	269	106	2e-21	0.32	0.45	3
09-G15	740	XP_002267096.1	PREDICTED: hypothetical protein	Vitis vinifera	387	274	7e-72	0.69	0.8	3
09-G23	877	EEF45346.1	conserved hypothetical protein	Ricinus communis	453	191	1e-46	0.61	0.73	3
09-G24	518	XP_002304331.1	predicted protein	Populus trichocarpa	155	168	2e-40	0.82	0.94	1	sp|Q9UTK2	RM19_SCHPO 60S ribosomal protein L19, mitochondrial	Schizosaccharomyces pombe	144	94.4	4e-19	0.46	0.64	1
09-H09	838	XP_002282471.1	PREDICTED: hypothetical protein	Vitis vinifera	276	439	e-121	0.82	0.93	1	sp|P42055	VDAC1_SOLTU Mitochondrial outer membrane protein porin of34 kDa	Solanum tuberosum	276	432	e-120	0.81	0.92	1
09-I03	772	CAN67827.1	hypothetical protein	Vitis vinifera	688	207	7e-52	0.56	0.7	1	sp|Q6P4L9	NFRKB_XENTR Nuclear factor related to kappa-B-bindingprotein	Xenopus tropicalis	1265	55.8	3e-07	0.28	0.52	1
09-I11	800	XP_002324618.1	predicted protein	Populus trichocarpa	475	496	e-138	0.84	0.93	3	sp|Q949Y3	PPA26_ARATH Bifunctional purple acid phosphatase 26	Arabidopsis thaliana	475	479	e-135	0.81	0.9	3
09-I20	647	XP_002269081.1	PREDICTED: hypothetical protein	Vitis vinifera	87	103	2e-20	0.67	0.75	2
09-J02	744	XP_002264828.1	PREDICTED: hypothetical protein	Vitis vinifera	272	400	e-110	0.95	0.97	3	sp|O24361	PSB5_SPIOL Proteasome subunit beta type-5	Spinaciaoleracea	272	382	e-105	0.89	0.93	3
09-J04	828	XP_002277422.1	PREDICTED: hypothetical protein	Vitis vinifera	307	174	1e-41	0.43	0.51	1	sp|Q6V9I6	HDT1_SOLCH Histone deacetylase HDT1	Solanum chacoens	269	139	2e-32	0.37	0.47	1
09-J08	552	XP_002306555.1	predicted protein	Populus trichocarpa	135	102	1e-20	0.68	0.77	3	sp|Q8VXX9	BETL1_ARATH Bet1-like protein At4g14600	Arabidopsisthaliana	137	99.8	1e-20	0.63	0.77	3
09-J10	783	XP_002274678.1	PREDICTED: hypothetical protein	Vitis vinifera	138	182	2e-44	0.78	0.89	3	sp|Q5JS54	PSMG4_HUMAN Proteasome assembly chaperone 4	Homosapiens	123	63.2	2e-09	0.31	0.56	3
09-J11	831	XP_002322720.1	predicted protein	Populus trichocarpa	975	281	5e-74	0.69	0.73	2	sp|O81645	VILI3_ARATH Villin-3	Arabidopsis thaliana	966	254	4e-67	0.6	0.7	2
09-J16	560	XP_002332119.1	predicted protein	Populus trichocarpa	447	106	1e-21	0.66	0.75	3
09-K13	607	XP_002307575.1	predicted protein	Populus trichocarpa	133	202	1e-50	0.69	0.8	3	sp|A4ZDL6	GNK2_GINBI Antifungal protein ginkbilobin-2	Ginkgobiloba	134	67.4	7e-11	0.36	0.49	3
09-K14	859	XP_002331421.1	predicted protein	Populus trichocarpa	492	285	5e-75	0.5	0.61	1	sp|Q1JP63	SVOP_BOVIN Synaptic vesicle 2-related protein	Bos tauru	548	111	7e-24	0.26	0.38	1
09-L04	304	XP_002304222.1	predicted protein	Populus trichocarpa	183	154	3e-36	0.76	0.87	1
09-L12	892	XP_002305665.1	predicted protein	Populus trichocarpa	325	254	6e-66	0.85	0.91	1	sp|Q53FA7	QORX_HUMAN Quinone oxidoreductase PIG3	Homo sapien	332	119	2e-26	0.43	0.59	1
09-M14	577	XP_002307625.1	predicted protein	Populus trichocarpa	195	257	4e-67	0.71	0.81	1	sp|O24542	AX22D_VIGRR Auxin-induced protein 22D	Vigna radiatavar. radiata	193	243	5e-64	0.7	0.8	1
09-M20	600	XP_002275006.1	PREDICTED: hypothetical protein	Vitis vinifera	296	217	5e-55	0.56	0.69	1	sp|Q9M330	PSMF1_ARATH Probable proteasome inhibitor	Arabidopsisthaliana	302	185	2e-46	0.48	0.64	1
09-N04	295	ACJ85877.1	unknown	Medicago truncatula	159	197	3e-49	0.95	0.97	1	sp|P56335	IF5A3_SOLTU Eukaryotic translation initiation factor 5A-3	Solanum tuberosum	160	197	2e-50	0.95	0.96	1
09-N16	560	EEF49901.1	conserved hypothetical protein	Ricinus communis	125	219	1e-55	0.84	0.89	3
09-O04	723	XP_002264821.1	PREDICTED: hypothetical protein	Vitis vinifera	375	339	1e-91	0.7	0.79	2	sp|Q9W6I0	UQCC_XENLA Ubiquinol-cytochrome c reductase complexchaperone CBP3 homolog	Xenopus laevis	200	63.5	1e-09	0.29	0.5	2
09-O08	800	CAN81917.1	hypothetical protein	Vitis vinifera	636	299	2e-79	0.68	0.8	1	sp|Q9FZP1	HPSE3_ARATH Heparanase-like protein 3	Arabidopsisthaliana	536	267	5e-71	0.61	0.78	1
09-O15	818	EEF50925.1	conserved hypothetical protein	Ricinus communis	236	224	6e-57	0.56	0.69	1	sp|Q9LK32	Y3721_ARATH Uncharacterized protein At3g27210	Arabidopsis thaliana	234	99.8	2e-20	0.42	0.54	1
09-O21	579	XP_002281317.1	PREDICTED: similar to HDA6 (HISTONE DEACETYLASE 6); histonedeacetylase	Vitis vinifera	464	134	5e-30	0.65	0.8	2	sp|Q9FML2	HDA6_ARATH Histone deacetylase 6	Arabidopsis thalian	471	95.9	2e-19	0.5	0.62	2
09-P01	643	XP_002322306.1	predicted protein	Populus trichocarpa	114	191	4e-47	0.82	0.92	3	sp|Q7S6S4	TIM16_NEUCR Mitochondrial import inner membranetranslocase subunit tim-16	Neurospora crass	141	67.8	6e-11	0.4	0.59	3
09-P09	208	XP_002264321.1	PREDICTED: hypothetical protein	Vitis vinifera	248	94.4	3e-18	0.66	0.76	2	sp|Q9LD45	BI1_ARATH Bax inhibitor 1	Arabidopsis thaliana	247	90.5	3e-18	0.6	0.75	2
09-P16	628	EEF38546.1	conserved hypothetical protein	Ricinus communis	112	110	7e-23	0.57	0.61	2	sp|Q9ZUX4	UMP2_ARATH Uncharacterized protein At2g27730,mitochondrial	Arabidopsis thaliana	113	80.5	8e-15	0.44	0.55	2
09-P19	789	CAO42586.1	unnamed protein product	Vitis vinifera	267	416	e-114	0.81	0.9	3	sp|Q5MPP0	FA2H_MOUSE Fatty acid 2-hydroxylase	Mus musculu	372	199	2e-50	0.4	0.58	3
09-P22	735	XP_002282471.1	PREDICTED: hypothetical protein	Vitis vinifera	276	252	3e-65	0.82	0.93	2	sp|P42055	VDAC1_SOLTU Mitochondrial outer membrane protein porin of34 kDa	Solanum tuberosum	276	248	2e-65	0.79	0.91	2
10-A01	644	XP_002263960.1	PREDICTED: hypothetical protein	Vitis vinifera	432	130	9e-29	0.47	0.54	2	sp|Q9FZ45	Y1686_ARATH Uncharacterized membrane protein At1g16860	Arabidopsis thaliana	474	92	3e-18	0.8	0.87	2
10-A06	751	ABK93998.1	unknown	Populus trichocarpa	171	264	6e-69	0.82	0.87	1	sp|A5PKK7	GORAB_BOVIN RAB6-interacting golgin	Bos tauru	370	62.8	2e-09	0.29	0.52	1
10-A10	491	XP_002309682.1	predicted protein	Populus trichocarpa	66	60.5	6e-08	0.53	0.68	2
10-A12	601	NP_197221.1	unknown protein	Arabidopsis thaliana	130	186	1e-45	0.7	0.76	2
10-B08	820	XP_002280872.1	PREDICTED: hypothetical protein	Vitis vinifera	328	304	8e-81	0.67	0.75	1	sp|Q55467	CHLM_SYNY3 Magnesium-protoporphyrin O-methyltransferase	Synechocystis sp. (strain ATCC 27184 / PCC 6803 /N-1)	230	163	2e-39	0.56	0.72	1
10-B21	290	XP_002445745.1	hypothetical protein SORBIDRAFT_07g024960	Sorghum bicolor	273	53.5	7e-06	0.95	1	2
10-C02	633	XP_002315617.1	predicted protein	Populus trichocarpa	217	324	3e-87	0.86	0.93	3	sp|Q9C9N5	Y1668_ARATH Probable inactive leucine-rich repeatreceptor-like protein kinase At1g66830	Arabidopsisthaliana	685	129	2e-29	0.39	0.59	3
10-C11	751	XP_002277802.1	PREDICTED: similar to UDP-glucuronic acid decarboxylase 1 isoform 1	Vitis vinifera	437	258	3e-67	0.65	0.7	1	sp|Q6DF08	UXS1_XENTR UDP-glucuronic acid decarboxylase 1	Xenopustropicalis	421	116	2e-25	0.7	0.79	1
10-D01	820	XP_002299870.1	predicted protein	Populus trichocarpa	405	324	5e-87	0.76	0.8	1	sp|P46573	APK1B_ARATH Protein kinase APK1B, chloroplastic	Arabidopsis thaliana	412	291	4e-78	0.69	0.76	1
10-D05	610	XP_002313036.1	predicted protein	Populus trichocarpa	527	180	9e-44	0.63	0.7	3	sp|P55231	GLGL3_ARATH Glucose-1-phosphate adenylyltransferase largesubunit 3, chloroplastic	Arabidopsis thaliana	521	152	1e-36	0.54	0.66	3
10-D07	672	XP_002265795.1	PREDICTED: hypothetical protein	Vitis vinifera	132	159	2e-37	0.62	0.71	3
10-D10	657	XP_002309231.1	predicted protein	Populus trichocarpa	214	271	3e-71	0.71	0.82	1	sp|P27061	PPA1_SOLLC Acid phosphatase 1	Solanum lycopersicu	255	214	5e-55	0.55	0.73	1
10-D11	614	XP_002271615.1	PREDICTED: hypothetical protein	Vitis vinifera	867	104	5e-21	0.77	0.87	2
10-D14	727	XP_002319261.1	predicted protein	Populus trichocarpa	165	217	1e-54	0.81	0.9	1
10-D19	683	XP_002305525.1	predicted protein	Populus trichocarpa	161	236	1e-60	0.74	0.8	2	sp|Q39255	SKP1A_ARATH SKP1-like protein 1A	Arabidopsis thalian	160	222	2e-57	0.68	0.79	2
10-D20	761	XP_002306365.1	predicted protein	Populus trichocarpa	442	311	e-107	0.83	0.88	2	sp|Q2KJ25	PSD12_BOVIN 26S proteasome non-ATPase regulatory subunit12	Bos taurus	456	176	4e-49	0.46	0.68	2
10-D22	711	EEF40545.1	conserved hypothetical protein	Ricinus communis	283	203	1e-50	0.65	0.74	3
10-E09	676	XP_002308618.1	predicted protein	Populus trichocarpa	449	317	8e-85	0.76	0.85	2	sp|P46644	AAT3_ARATH Aspartate aminotransferase, chloroplastic	Arabidopsis thaliana	449	314	4e-85	0.79	0.89	2
10-E21	498	XP_002283510.1	PREDICTED: hypothetical protein	Vitis vinifera	535	139	1e-31	0.9	0.93	2	sp|Q76NU3	TCPZ_DICDI T-complex protein 1 subunit zeta	Dictyostelium discoideum	539	87.8	3e-17	0.57	0.73	2
10-F14	605	XP_002277951.1	PREDICTED: similar to Os07g0631100	Vitis vinifera	95	142	2e-32	0.94	0.97	2	sp|Q8LHP0	ELOF1_ORYSJ Transcription elongation factor 1 homolog	Oryza sativa subsp. japonica	89	138	2e-32	0.89	0.97	2
10-F23	701	XP_002306732.1	predicted protein	Populus trichocarpa	358	335	2e-90	0.73	0.83	3	sp|Q9SZ83	Y4967_ARATH Uncharacterized oxidoreductase At4g09670	Arabidopsis thaliana	362	294	4e-79	0.66	0.79	3
10-G06	318	XP_002318092.1	predicted protein	Populus trichocarpa	442	203	4e-51	0.95	0.97	1	sp|Q9SS90	RGLG1_ARATH E3 ubiquitin-protein ligase RGLG1	Arabidopsis thaliana	489	189	5e-48	0.84	0.95	1
10-H08	534	XP_002269802.1	PREDICTED: hypothetical protein	Vitis vinifera	987	174	4e-42	0.78	0.92	-2	sp|Q9SH30	AHM7_ARATH Putative copper-transporting ATPase 3	Arabidopsis thaliana	995	147	4e-35	0.62	0.88	-2
10-H20	543	XP_002274169.1	PREDICTED: hypothetical protein	Vitis vinifera	1101	171	3e-41	0.55	0.67	1	sp|O81635	ATK4_ARATH Kinesin-4	Arabidopsis thaliana	987	59.7	1e-08	0.47	0.64	1
10-H22	836	XP_002284108.1	PREDICTED: hypothetical protein	Vitis vinifera	226	139	3e-31	0.39	0.46	1	sp|Q84TE9	DOF53_ARATH Dof zinc finger protein DOF5.3	Arabidopsisthaliana	257	100	9e-21	0.85	0.95	1
10-I07	528	XP_002273358.1	PREDICTED: hypothetical protein	Vitis vinifera	485	230	4e-59	0.74	0.88	2	sp|Q70E96	AL3F1_ARATH Aldehyde dehydrogenase family 3 member F1	Arabidopsis thaliana	484	196	9e-50	0.64	0.81	2
10-I09	551	XP_002316366.1	predicted protein	Populus trichocarpa	331	266	5e-70	0.75	0.86	3	sp|Q99685	MGLL_HUMAN Monoglyceride lipase	Homo sapiens	303	60.8	5e-09	0.34	0.48	3
10-I11	447	XP_002327076.1	predicted protein	Populus trichocarpa	247	186	9e-46	0.82	0.89	2	sp|P28493	PR5_ARATH Pathogenesis-related protein 5	Arabidopsisthaliana	239	141	2e-33	0.61	0.79	2
10-J13	753	XP_002276606.1	PREDICTED: hypothetical protein	Vitis vinifera	575	269	2e-70	0.72	0.8	2	sp|Q9ZVM9	Y1461_ARATH Probable serine/threonine-protein kinaseAt1g54610	Arabidopsis thaliana	572	165	3e-40	0.54	0.65	2
10-K07	769	ABK94709.1	unknown	Populus trichocarpa	507	226	1e-57	0.68	0.85	2	sp|O64718	C71B9_ARATH Cytochrome P450 71B9	Arabidopsis thalian	500	186	1e-46	0.61	0.72	2
10-K21	721	XP_002309498.1	predicted protein	Populus trichocarpa	482	191	7e-47	0.6	0.71	1	sp|Q84KI6	SQD1_SPIOL UDP-sulfoquinovose synthase, chloroplastic	Spinacia oleracea	482	149	2e-35	0.5	0.64	1
10-L07	727	XP_002266689.1	PREDICTED: hypothetical protein	Vitis vinifera	618	258	3e-67	0.59	0.72	2	sp|O64705	PP184_ARATH Pentatricopeptide repeat-containing proteinAt2g34400	Arabidopsis thaliana	621	199	2e-50	0.55	0.75	2
10-L19	495	XP_002306911.1	predicted protein	Populus trichocarpa	398	137	5e-31	0.55	0.71	3	sp|Q56XU4	C3H6_ARATH Zinc finger CCCH domain-containing protein 6	Arabidopsis thaliana	413	95.1	2e-19	0.43	0.56	3
10-L21	687	XP_002301343.1	predicted protein	Populus trichocarpa	306	275	3e-72	0.64	0.78	3	sp|Q9M2E2	SDR1_ARATH (+)-neomenthol dehydrogenase	Arabidopsisthaliana	296	234	5e-61	0.58	0.73	3
10-M03	625	XP_002308036.1	predicted protein	Populus trichocarpa	401	285	3e-75	0.69	0.84	3	sp|Q54XF2	KGUA_DICDI Guanylate kinase	Dictyostelium discoideu	202	80.9	6e-15	0.59	0.71	3
10-M12	604	XP_002284369.1	PREDICTED: hypothetical protein	Vitis vinifera	153	158	3e-37	0.49	0.71	2
10-M13	519	ACJ85329.1	unknown	Medicago truncatula	186	204	4e-51	0.77	0.94	3	sp|Q93ZN9	DAPAT_ARATH LL-diaminopimelate aminotransferase,chloroplastic	Arabidopsis thaliana	461	199	8e-51	0.73	0.88	3
10-M19	679	XP_002264324.1	PREDICTED: hypothetical protein isoform 1	Vitis vinifera	266	364	3e-99	0.87	0.94	1	sp|Q9LMX8	6PGL1_ARATH Probable 6-phosphogluconolactonase 1	Arabidopsis thaliana	268	288	2e-77	0.71	0.81	1
10-N01	459	NP_565726.1	unknown protein	Arabidopsis thaliana	71	128	2e-28	0.85	0.98	1
10-N04	628	XP_002284473.1	PREDICTED: hypothetical protein	Vitis vinifera	585	231	3e-59	0.84	0.89	3	sp|Q9FJD5	LAC17_ARATH Laccase-17	Arabidopsis thaliana	577	223	6e-58	0.82	0.88	3
10-N06	376	XP_002301278.1	predicted protein	Populus trichocarpa	744	171	3e-41	0.85	0.92	2	sp|O20250	TKTC_SPIOL Transketolase, chloroplastic	Spinaciaoleracea	741	161	1e-39	0.81	0.89	2
10-N19	533	XP_002271934.1	PREDICTED: hypothetical protein	Vitis vinifera	578	76.6	9e-13	0.47	0.68	1
10-O02	793	NP_886496.1	hypothetical protein BPP4369	Bordetella parapertussis 12822	677	231	8e-59	0.91	0.93	-1	sp|A9HVN4	SMG_BORPD Protein smg homolog	Bordetella petrii(strain ATCC BAA-461 / DSM 12804 / CCUG 43448)	152	96.7	2e-19	0.78	0.8	-3
10-O09	356	XP_002285417.1	PREDICTED: hypothetical protein isoform 2	Vitis vinifera	273	59.7	9e-08	0.67	0.79	2	sp|Q7DLS1	PSB7B_ARATH Proteasome subunit beta type-7-B	Arabidopsis thaliana	274	58.2	2e-08	0.6	0.74	2
10-O11	848	XP_002330723.1	predicted protein	Populus trichocarpa	153	108	8e-22	0.92	0.96	3	sp|Q94A97	UBC35_ARATH Ubiquitin-conjugating enzyme E2 35	Arabidopsis thaliana	153	108	6e-23	0.92	0.96	3
10-O15	727	XP_002277597.1	PREDICTED: similar to nad9	Vitis vinifera	229	68.6	5e-10	0.68	0.72	3
10-O20	817	YP_350928.1	hypothetical protein Pfl01_5200	Pseudomonas fluorescens Pf0-1	258	203	1e-50	0.56	0.72	1	sp|A3AB67	FH16_ORYSJ Formin-like protein 16	Oryza sativa subsp.japonica	906	54.7	8e-07	0.26	0.36	-1
10-O24	751	XP_002306132.1	predicted protein	Populus trichocarpa	1067	229	2e-58	0.74	0.84	2	sp|A9JTP3	BIRC7_XENTR Baculoviral IAP repeat-containing protein 7	Xenopus tropicalis	365	56.2	2e-07	0.24	0.41	2
10-P02	798	XP_002270329.1	PREDICTED: hypothetical protein	Vitis vinifera	448	344	5e-93	0.65	0.79	1	sp|Q94CD1	HHT1_ARATH Omega-hydroxypalmitate O-feruloyl transferase	Arabidopsis thaliana	457	133	1e-30	0.35	0.57	1
10-P05	842	XP_002285275.1	PREDICTED: hypothetical protein	Vitis vinifera	288	219	3e-55	0.47	0.59	3
10-P24	878	CAO14771.1	unnamed protein product	Vitis vinifera	378	344	7e-93	0.58	0.74	2	sp|Q9LII9	GDL54_ARATH GDSL esterase/lipase At3g27950	Arabidopsisthaliana	371	289	2e-77	0.57	0.73	2
11-A05	827	XP_002278797.1	PREDICTED: hypothetical protein	Vitis vinifera	217	357	1e-96	0.79	0.87	2	sp|P0AGJ4	TRMH_SHIFL tRNA guanosine-2'-O-methyltransferase	Shigella flexneri	229	63.9	1e-09	0.29	0.51	2
11-A06	814	EEF27460.1	conserved hypothetical protein	Ricinus communis	169	151	8e-35	0.52	0.58	3
11-A22	370	XP_002319871.1	predicted protein	Populus trichocarpa	180	81.3	3e-14	0.76	0.95	1
11-B08	667	XP_002283273.1	PREDICTED: hypothetical protein	Vitis vinifera	820	398	e-109	0.89	0.95	3	sp|Q84WU8	FTSH3_ARATH ATP-dependent zinc metalloprotease FTSH 3,mitochondrial	Arabidopsis thaliana	809	392	e-108	0.86	0.95	3
11-B11	663	XP_002331957.1	predicted protein	Populus trichocarpa	714	198	4e-49	0.71	0.79	3	sp|O23661	ARFC_ARATH Auxin response factor 3	Arabidopsisthaliana	608	196	1e-49	0.69	0.8	3
11-B19	564	XP_002274975.1	PREDICTED: hypothetical protein	Vitis vinifera	406	291	2e-77	0.79	0.85	2	sp|Q9XF97	RL4_PRUAR 60S ribosomal protein L4	Prunus armeniac	408	291	2e-78	0.78	0.86	2
11-C02	639	XP_002324452.1	predicted protein	Populus trichocarpa	315	206	1e-51	0.81	0.86	3	sp|O34948	YKWC_BACSU Uncharacterized oxidoreductase ykwC	Bacillus subtilis	288	100	6e-21	0.43	0.61	3
11-C08	652	XP_002283766.1	PREDICTED: hypothetical protein	Vitis vinifera	548	326	9e-88	0.8	0.88	1	sp|P58223	Y4837_ARATH KH domain-containing protein At4g18375	Arabidopsis thaliana	606	87.4	7e-17	0.33	0.53	1
11-C13	699	XP_002298901.1	predicted protein	Populus trichocarpa	331	120	1e-25	1	1	1
11-C17	746	XP_002299315.1	predicted protein	Populus trichocarpa	129	182	3e-44	0.7	0.81	1
11-C24	761	XP_002281275.1	PREDICTED: hypothetical protein	Vitis vinifera	295	221	6e-56	0.62	0.74	1	sp|Q17335	ADHX_CAEEL Alcohol dehydrogenase class-3	Caenorhabditis elegans	384	131	4e-30	0.41	0.54	1
11-D10	728	ACJ85349.1	unknown	Medicago truncatula	285	425	e-117	0.94	0.99	1	sp|O24076	GBLP_MEDSA Guanine nucleotide-binding protein subunitbeta-like protein	Medicago sativa	325	422	e-118	0.94	0.98	1
11-D22	339	XP_002323893.1	predicted protein	Populus trichocarpa	143	102	2e-20	0.88	0.94	3	sp|Q9FNP8	RS193_ARATH 40S ribosomal protein S19-3	Arabidopsisthaliana	143	100	4e-21	0.85	0.92	3
11-D23	730	EEF35503.1	conserved hypothetical protein	Ricinus communis	484	348	2e-94	0.68	0.79	2
11-F03	722	XP_002284882.1	PREDICTED: hypothetical protein	Vitis vinifera	900	314	4e-84	0.96	0.97	3	sp|Q6N069	NAA16_HUMAN N-alpha-acetyltransferase 16, NatA auxiliarysubunit	Homo sapiens	864	225	3e-58	0.69	0.82	3
11-F18	773	EEF43567.1	conserved hypothetical protein	Ricinus communis	402	208	4e-52	0.54	0.71	1
11-G07	557	XP_002279152.1	PREDICTED: hypothetical protein isoform 2	Vitis vinifera	199	256	8e-67	0.69	0.75	1	sp|O42929	DENR_SCHPO Translation machinery-associated protein 22	Schizosaccharomyces pombe	190	107	6e-23	0.35	0.49	1
11-G11	613	XP_002331301.1	predicted protein	Populus trichocarpa	670	72.8	2e-11	0.82	0.92	2	sp|Q9LPG6	RHM2_ARATH Probable rhamnose biosynthetic enzyme 2	Arabidopsis thaliana	667	64.3	6e-10	0.7	0.85	2
11-H11	827	XP_002331118.1	predicted protein	Populus trichocarpa	917	318	4e-85	0.69	0.76	1	sp|Q9LQ55	DRP2B_ARATH Dynamin-2B	Arabidopsis thaliana	920	296	9e-80	0.64	0.73	1
11-H13	683	EEF41527.1	conserved hypothetical protein	Ricinus communis	204	214	5e-54	0.6	0.7	3	sp|P20144	WUN1_SOLTU Wound-induced protein 1	Solanum tuberosu	105	116	2e-25	0.5	0.59	3
11-H15	797	EEF40071.1	conserved hypothetical protein	Ricinus communis	153	182	3e-44	0.62	0.72	1	sp|P0CB17	U497K_ARATH UPF0497 membrane protein At3g50810	Arabidopsis thaliana	154	138	4e-32	0.49	0.61	1
11-H16	654	XP_002325862.1	predicted protein	Populus trichocarpa	353	361	2e-98	0.93	0.96	3	sp|Q54BN3	RFC3_DICDI Probable replication factor C subunit 3	Dictyostelium discoideum	347	213	7e-55	0.51	0.76	3
11-I04	691	XP_002273058.1	PREDICTED: hypothetical protein isoform 1	Vitis vinifera	290	102	2e-20	0.79	0.86	1	sp|P60193	RNZN_WHEAT Nuclear ribonuclease Z (Fragment)	Triticumaestivum	176	101	4e-21	0.76	0.88	1
11-I11	791	XP_002313877.1	predicted protein	Populus trichocarpa	400	397	e-109	0.78	0.92	3	sp|Q71DJ5	LIP1_ARATH Triacylglycerol lipase 1	Arabidopsisthaliana	393	373	e-103	0.75	0.88	3
11-I18	747	XP_002264131.1	PREDICTED: hypothetical protein	Vitis vinifera	1147	262	3e-68	0.57	0.67	2	sp|P34739	TTF2_DROME Transcription termination factor 2	Drosophila melanogaster	1061	69.7	2e-11	0.33	0.49	2
11-J07	781	XP_002282574.1	PREDICTED: hypothetical protein	Vitis vinifera	436	153	2e-35	0.47	0.54	3
11-J18	836	XP_002311834.1	predicted protein	Populus trichocarpa	437	162	5e-38	0.38	0.52	1	sp|Q8RVH5	7SBG2_SOYBN Basic 7S globulin 2	Glycine max	433	88.2	6e-17	0.27	0.4	1
11-K11	696	XP_002284849.1	PREDICTED: hypothetical protein	Vitis vinifera	530	341	3e-92	0.8	0.84	3	sp|O14236	NOG2_SCHPO Nucleolar GTP-binding protein 2	Schizosaccharomyces pombe	537	152	3e-36	0.43	0.59	3
11-L06	810	XP_002285542.1	PREDICTED: hypothetical protein isoform 1	Vitis vinifera	447	364	5e-99	0.82	0.9	2
11-L12	746	XP_002311182.1	predicted protein	Populus trichocarpa	266	327	7e-88	0.76	0.87	1	sp|P50165	TRNH_DATST Tropinone reductase homolog	Daturastramonium	268	259	1e-68	0.64	0.77	1
11-M08	784	EEF42995.1	conserved hypothetical protein	Ricinus communis	238	364	6e-99	0.84	0.91	3	sp|Q9JMD3	PCTL_MOUSE PCTP-like protein	Mus musculus	291	55.8	3e-07	0.24	0.45	3
11-N09	552	EEF49979.1	conserved hypothetical protein	Ricinus communis	78	68.6	3e-10	0.57	0.69	2
11-P13	828	YP_002872319.1	hypothetical protein PFLU2737	Pseudomonas fluorescens SBW25	132	179	3e-43	0.68	0.77	-3
12-B01	845	XP_002269622.1	PREDICTED: hypothetical protein	Vitis vinifera	343	308	3e-82	0.74	0.85	2
12-B17	760	XP_002304390.1	predicted protein	Populus trichocarpa	174	258	5e-67	0.86	0.94	-1	sp|Q01484	ANK2_HUMAN Ankyrin-2	Homo sapiens	3924	74.3	8e-13	0.43	0.58	-1
12-B18	867	CAO47407.1	unnamed protein product	Vitis vinifera	676	239	2e-61	0.53	0.69	2	sp|A6Q167	IF3_NITSB Translation initiation factor IF-3	Nitratiruptor sp. (strain SB155-2)	177	105	4e-22	0.39	0.6	2
12-B19	851	XP_002317584.1	predicted protein	Populus trichocarpa	278	315	3e-84	0.69	0.77	1	sp|P87027	SPG1_SCHPO Septum-promoting GTP-binding protein 1	Schizosaccharomyces pombe	198	157	1e-37	0.5	0.7	1
12-B22	854	ACJ07159.1	unknown	Litchi chinensis	277	410	e-113	0.83	0.87	1	sp|Q9FZ45	Y1686_ARATH Uncharacterized membrane protein At1g16860	Arabidopsis thaliana	474	309	1e-83	0.66	0.76	1
12-C02	798	EEF31901.1	conserved hypothetical protein	Ricinus communis	681	207	1e-51	0.57	0.7	3
12-C04	796	CAO22046.1	unnamed protein product	Vitis vinifera	608	215	4e-54	0.91	0.99	1	sp|Q9M2F9	RH52_ARATH DEAD-box ATP-dependent RNA helicase 52	Arabidopsis thaliana	646	209	1e-53	0.9	0.94	1
12-C05	812	ABK94318.1	unknown	Populus trichocarpa	354	363	1e-98	0.69	0.81	1	sp|P24102	PER22_ARATH Peroxidase 22	Arabidopsis thalian	349	313	1e-84	0.62	0.69	1
12-C06	756	XP_002308060.1	predicted protein	Populus trichocarpa	198	155	3e-36	0.91	0.96	3	sp|Q00451	PRF1_SOLLC 36.4 kDa proline-rich protein	Solanumlycopersicum	346	105	3e-22	0.57	0.79	3
12-C12	755	XP_002285398.1	PREDICTED: hypothetical protein	Vitis vinifera	687	392	e-107	0.89	0.94	1	sp|P30008	SIR_SYNE7 Sulfite reductase [ferredoxin]	Synechococcuselongatus (strain PCC 7942)	624	171	4e-42	0.46	0.64	1
12-C15	813	XP_002323796.1	predicted protein	Populus trichocarpa	514	401	e-110	0.94	0.97	1	sp|P37830	G6PD_SOLTU Glucose-6-phosphate 1-dehydrogenase,cytoplasmic isoform	Solanum tuberosum	511	395	e-109	0.92	0.97	1
12-C22	831	XP_002322264.1	predicted protein	Populus trichocarpa	238	290	1e-76	0.75	0.79	3	sp|Q9SMP0	NFYC1_ARATH Nuclear transcription factor Y subunit C-1	Arabidopsis thaliana	234	271	5e-72	0.71	0.75	3
12-C24	589	XP_002299973.1	predicted protein	Populus trichocarpa	114	112	3e-23	0.5	0.62	2
12-D04	800	XP_002272727.1	PREDICTED: similar to 60S ribosomal protein L19	Vitis vinifera	206	224	9e-57	0.73	0.76	1	sp|Q9LUQ6	RL192_ARATH 60S ribosomal protein L19-2	Arabidopsisthaliana	209	205	3e-52	0.68	0.7	1
12-D07	832	XP_002317152.1	predicted protein	Populus trichocarpa	305	386	e-105	0.75	0.83	3	sp|Q7Y175	UBAX1_ARATH UBA and UBX domain-containing proteinAt4g15410	Arabidopsis thaliana	421	267	6e-71	0.53	0.64	3
12-D08	880	XP_002298552.1	predicted protein	Populus trichocarpa	915	436	e-120	0.74	0.83	3	sp|B0F9L4	GOGC6_ARATH Golgin candidate 6	Arabidopsis thalian	914	386	e-106	0.66	0.78	3
12-D14	663	XP_002325835.1	predicted protein	Populus trichocarpa	545	259	1e-67	0.83	0.87	2	sp|Q6EE31	TCPQ_CHICK T-complex protein 1 subunit theta	Gallusgallus	548	158	3e-38	0.52	0.66	2
12-D18	839	XP_002300777.1	predicted protein	Populus trichocarpa	484	243	2e-62	0.66	0.76	3
12-D24	842	CAO47620.1	unnamed protein product	Vitis vinifera	512	430	e-119	0.74	0.85	2	sp|Q9SIX1	KCS9_ARATH 3-ketoacyl-CoA synthase 9	Arabidopsisthaliana	512	420	e-117	0.7	0.84	2
12-E10	820	XP_002283027.1	PREDICTED: hypothetical protein	Vitis vinifera	437	267	8e-70	0.87	0.94	1	sp|P35614	ERF1Z_ARATH Eukaryotic peptide chain release factorsubunit 1-3	Arabidopsis thaliana	435	255	3e-67	0.82	0.92	1
12-E12	789	XP_002267276.1	PREDICTED: hypothetical protein	Vitis vinifera	211	293	2e-77	0.89	0.95	3	sp|P36862	YPTV3_VOLCA GTP-binding protein yptV3	Volvox carter	203	186	2e-46	0.57	0.72	3
12-E13	524	ACJ85475.1	unknown	Medicago truncatula	269	72	2e-11	0.78	0.87	3	sp|P45434	SSRA_ARATH Translocon-associated protein subunit alpha	Arabidopsis thaliana	258	55.8	1e-07	0.58	0.8	3
12-E21	370	XP_002280046.1	PREDICTED: similar to Os12g0143100	Vitis vinifera	73	150	4e-35	0.95	1	3	sp|Q9FGZ9	UBL5_ARATH Ubiquitin-like protein 5	Arabidopsisthaliana	73	148	1e-35	0.94	0.98	3
12-F08	323	XP_002263054.1	PREDICTED: hypothetical protein	Vitis vinifera	150	113	6e-24	0.87	0.93	2
12-F13	571	XP_002283546.1	PREDICTED: hypothetical protein	Vitis vinifera	95	99.4	2e-19	0.63	0.71	3	sp|Q9SB61	Y4466_ARATH ZF-HD homeobox protein At4g24660	Arabidopsis thaliana	220	83.2	1e-15	0.68	0.76	3
12-F19	713	XP_002285175.1	PREDICTED: hypothetical protein	Vitis vinifera	143	139	4e-54	0.73	0.79	2	sp|Q8SAG3	ADF_VITVI Actin-depolymerizing factor	Vitis vinifer	143	132	2e-51	0.69	0.78	2
12-G10	882	XP_002306900.1	predicted protein	Populus trichocarpa	367	484	e-135	0.81	0.87	2	sp|P25804	CYSP_PEA Cysteine proteinase 15A	Pisum sativum	363	432	e-120	0.73	0.84	2
12-G18	744	EEF52328.1	conserved hypothetical protein	Ricinus communis	173	141	7e-32	0.61	0.72	3	sp|Q9FMH6	WPP1_ARATH WPP domain-containing protein 1	Arabidopsisthaliana	155	138	3e-32	0.56	0.77	3
12-G20	351	XP_002332154.1	predicted protein	Populus trichocarpa	334	108	1e-22	0.6	0.68	1	sp|Q9BY78	RNF26_HUMAN RING finger protein 26	Homo sapien	433	49.3	8e-06	0.38	0.52	1
12-H13	803	XP_002273446.1	PREDICTED: hypothetical protein	Vitis vinifera	392	448	e-124	0.89	0.95	3	sp|Q8R3F5	FABD_MOUSE Malonyl-CoA-acyl carrier protein transacylase,mitochondrial	Mus musculus	381	177	1e-43	0.42	0.58	3
12-H18	543	XP_002301800.1	predicted protein	Populus trichocarpa	317	244	3e-63	0.84	0.89	3	sp|O14270	FHL1_SCHPO Fork head transcription factor 1	Schizosaccharomyces pombe	743	74.7	3e-13	0.42	0.56	3
12-H23	784	XP_002279789.1	PREDICTED: hypothetical protein	Vitis vinifera	769	425	e-117	0.92	0.98	2	sp|Q06068	HSP97_STRPU 97 kDa heat shock protein	Strongylocentrotus purpuratus	889	227	8e-59	0.5	0.69	2
12-I08	725	XP_002303054.1	predicted protein	Populus trichocarpa	212	251	5e-65	0.68	0.72	1
12-I17	555	XP_002325986.1	predicted protein	Populus trichocarpa	437	115	2e-24	0.72	0.88	3
12-J05	779	XP_002298074.1	predicted protein	Populus trichocarpa	577	405	e-111	0.81	0.89	2	sp|Q9S746	HTH_ARATH Protein HOTHEAD	Arabidopsis thaliana	594	285	2e-76	0.61	0.77	2
12-J17	714	XP_002273785.1	PREDICTED: hypothetical protein	Vitis vinifera	818	364	4e-99	0.87	0.9	1	sp|P35016	ENPL_CATRO Endoplasmin homolog	Catharanthus roseu	817	363	e-100	0.86	0.9	1
12-J23	748	CAO60941.1	unnamed protein product	Vitis vinifera	164	199	2e-49	0.79	0.89	1
12-J24	819	XP_002313426.1	predicted protein	Populus trichocarpa	786	429	e-118	0.79	0.84	3	sp|Q0DHL4	FTSH8_ORYSJ ATP-dependent zinc metalloprotease FTSH 8,mitochondrial	Oryza sativa subsp. japonica	822	424	e-118	0.78	0.84	3
12-K02	830	XP_002274845.1	PREDICTED: hypothetical protein	Vitis vinifera	399	190	1e-46	0.49	0.68	1
12-K03	883	XP_002308584.1	predicted protein	Populus trichocarpa	418	313	1e-83	0.54	0.69	2
12-K15	671	CAO41286.1	unnamed protein product	Vitis vinifera	530	313	1e-83	0.88	0.96	3	sp|A9UZS7	BOP1_MONBE Ribosome biogenesis protein BOP1 homolog	Monosiga brevicollis	799	217	6e-56	0.61	0.78	3
12-K20	839	XP_002311531.1	predicted protein	Populus trichocarpa	619	276	2e-72	0.83	0.86	2
12-L04	560	EEE68778.1	hypothetical protein OsJ_27492	Oryza sativa Japonica Group	1170	56.2	2e-09	0.33	0.47	-1
12-L15	692	XP_002283639.1	PREDICTED: hypothetical protein	Vitis vinifera	241	209	1e-52	0.64	0.79	2
12-L22	747	XP_002272480.1	PREDICTED: hypothetical protein	Vitis vinifera	1375	264	7e-69	0.74	0.88	2
12-M02	812	XP_002272407.1	PREDICTED: hypothetical protein	Vitis vinifera	407	150	1e-34	0.41	0.53	1	sp|Q9SI37	WRKY1_ARATH WRKY transcription factor 1	Arabidopsisthaliana	487	126	2e-28	0.51	0.61	1
12-M05	770	XP_002279542.1	PREDICTED: hypothetical protein	Vitis vinifera	423	264	8e-69	0.71	0.78	3
12-M08	777	XP_002266817.1	PREDICTED: hypothetical protein	Vitis vinifera	321	279	2e-73	0.69	0.85	2	sp|O75431	MTX2_HUMAN Metaxin-2	Homo sapiens	263	57.8	8e-08	0.23	0.44	2
12-M11	571	XP_002275765.1	PREDICTED: hypothetical protein	Vitis vinifera	193	138	2e-31	0.91	0.95	3	sp|O04834	SAR1A_ARATH GTP-binding protein SAR1A	Arabidopsisthaliana	193	134	5e-31	0.88	0.94	3
12-M15	693	EEF33076.1	conserved hypothetical protein	Ricinus communis	157	206	2e-51	0.63	0.75	3
12-M19	665	EEF33050.1	conserved hypothetical protein	Ricinus communis	188	226	1e-57	0.65	0.73	3
12-M21	802	XP_002297858.1	predicted protein	Populus trichocarpa	273	340	7e-92	0.72	0.85	3	sp|O35459	ECH1_MOUSE Delta(3,5)-Delta(2,4)-dienoyl-CoA isomerase,mitochondrial	Mus musculus	327	179	1e-44	0.41	0.59	3
12-N01	800	XP_002319579.1	predicted protein	Populus trichocarpa	187	318	3e-85	0.84	0.9	2
12-N14	809	XP_002301290.1	predicted protein	Populus trichocarpa	327	239	2e-61	0.61	0.73	1	sp|P51103	DFRA_CALCH Dihydroflavonol-4-reductase	Callistephuschinensis	364	164	5e-40	0.46	0.66	1
12-N18	755	XP_002311627.1	predicted protein	Populus trichocarpa	507	351	3e-95	0.73	0.87	1
12-N21	508	XP_002278050.1	PREDICTED: hypothetical protein	Vitis vinifera	359	67	6e-10	0.44	0.58	1
12-O08	730	XP_002271882.1	PREDICTED: hypothetical protein	Vitis vinifera	479	405	e-111	0.79	0.88	1	sp|Q9LM55	FBK8_ARATH F-box/kelch-repeat protein At1g22040	Arabidopsis thaliana	475	334	3e-91	0.63	0.8	1
12-O22	646	XP_002280012.1	PREDICTED: hypothetical protein	Vitis vinifera	151	297	6e-79	0.97	1	3	sp|P62302	RS13_SOYBN 40S ribosomal protein S13	Glycine ma	151	297	4e-80	0.98	0.99	3
12-O24	762	XP_002326399.1	predicted protein	Populus trichocarpa	492	186	5e-72	0.74	0.85	2	sp|Q93ZG7	RH38_ARATH DEAD-box ATP-dependent RNA helicase 38	Arabidopsis thaliana	496	169	4e-66	0.67	0.78	2
12-P01	751	EEF52310.1	conserved hypothetical protein	Ricinus communis	390	416	e-114	0.76	0.85	1	sp|O74913	YJ72_SCHPO Uncharacterized protein C757.02c	Schizosaccharomyces pombe	405	84	1e-15	0.29	0.52	1
12-P11	427	XP_002311809.1	predicted protein	Populus trichocarpa	107	154	4e-36	0.79	0.88	-2	sp|P0CB92	NDUA8_PONPY NADH dehydrogenase [ubiquinone] 1 alphasubcomplex subunit 8	Pongo pygmaeus	172	59.7	6e-09	0.32	0.55	-2
12-P16	775	XP_002312213.1	predicted protein	Populus trichocarpa	605	184	1e-44	0.72	0.81	2	sp|Q1RMS2	PYRG2_BOVIN CTP synthase 2	Bos taurus	586	97.8	7e-20	0.58	0.72	2
12-P19	731	XP_002328729.1	predicted protein	Populus trichocarpa	128	245	3e-63	0.94	0.96	3
12-P20	757	XP_002280725.1	PREDICTED: hypothetical protein	Vitis vinifera	656	392	e-107	0.75	0.88	1	sp|Q9MA85	PP215_ARATH Pentatricopeptide repeat-containing proteinAt3g05340	Arabidopsis thaliana	658	357	5e-98	0.68	0.82	1
13-A05	582	XP_002272374.1	PREDICTED: hypothetical protein	Vitis vinifera	226	78.2	4e-13	0.52	0.61	1
13-A17	808	XP_002276354.1	PREDICTED: hypothetical protein	Vitis vinifera	1065	404	e-111	0.77	0.83	2	sp|Q0WR59	Y5020_ARATH Probable inactive receptor kinase At5g10020	Arabidopsis thaliana	1048	382	e-105	0.71	0.83	2
13-B04	389	XP_002313700.1	predicted protein	Populus trichocarpa	143	95.1	2e-18	0.97	1	-3	sp|Q54CU7	TPC2L_DICDI Trafficking protein particle complex subunit2-like protein	Dictyostelium discoideum	140	58.5	1e-08	0.55	0.82	-3
13-B16	702	XP_002328543.1	predicted protein	Populus trichocarpa	292	307	5e-82	0.75	0.87	3	sp|Q9ZVL6	U603_ARATH UPF0603 protein At1g54780, chloroplastic	Arabidopsis thaliana	285	260	5e-69	0.66	0.78	3
13-B19	672	ABK92784.1	unknown	Populus trichocarpa	204	233	1e-59	0.93	0.95	2	sp|Q9LHG9	NACA1_ARATH Nascent polypeptide-associated complexsubunit alpha-like protein 1	Arabidopsis thalian	203	219	1e-56	0.86	0.9	2
13-B20	653	XP_002269102.1	PREDICTED: hypothetical protein	Vitis vinifera	438	300	7e-80	0.76	0.86	3
13-B24	818	EEF41691.1	conserved hypothetical protein	Ricinus communis	515	186	2e-45	0.66	0.81	2
13-C02	782	XP_002313558.1	predicted protein	Populus trichocarpa	468	347	9e-94	0.64	0.79	1	sp|Q9S9K4	ASPL2_ARATH Aspartic proteinase-like protein 2	Arabidopsis thaliana	475	136	2e-31	0.33	0.52	1
13-C17	336	EEF34596.1	hypothetical protein RCOM_0629030	Ricinus communis	1014	145	1e-33	0.64	0.8	3
13-D13	827	XP_002270229.1	PREDICTED: hypothetical protein	Vitis vinifera	457	154	1e-70	0.55	0.64	3
13-D14	400	XP_002284407.1	PREDICTED: hypothetical protein	Vitis vinifera	371	190	5e-47	0.68	0.81	1
13-D19	819	ABK96406.1	unknown	Populus trichocarpa x Populus deltoides	358	455	e-126	0.86	0.9	3	sp|P08440	ALF_MAIZE Fructose-bisphosphate aldolase, cytoplasmicisozyme	Zea mays	355	421	e-117	0.8	0.86	3
13-D23	853	XP_002268776.1	PREDICTED: hypothetical protein	Vitis vinifera	544	506	e-141	0.82	0.91	3
13-E11	831	XP_002311694.1	predicted protein	Populus trichocarpa	524	401	e-110	0.8	0.86	2	sp|Q9AV81	PUB72_ORYSJ U-box domain-containing protein 72	Oryzasativa subsp. japonica	527	351	4e-96	0.72	0.8	2
13-E15	590	XP_002278078.1	PREDICTED: hypothetical protein	Vitis vinifera	381	290	4e-77	0.77	0.85	1
13-E16	457	XP_002310869.1	predicted protein	Populus trichocarpa	221	131	2e-29	0.85	0.92	3	sp|Q7XSZ4	PAS2A_ORYSJ 3-hydroxyacyl-CoA dehydratase PASTICCINO 2A	Oryza sativa subsp. japonica	221	120	3e-27	0.79	0.92	3
13-E21	796	EEF28091.1	protein with unknown function	Ricinus communis	216	314	5e-84	0.81	0.83	2	sp|P28186	ARA3_ARATH Ras-related protein ARA-3	Arabidopsisthaliana	216	306	1e-82	0.79	0.83	2
13-F01	866	CAO63397.1	unnamed protein product	Vitis vinifera	465	120	1e-25	0.44	0.55	3	sp|B3H6K1	Y4791_ARATH Uncharacterized protein At4g17910	Arabidopsis thaliana	363	88.6	5e-17	0.51	0.72	3
13-F03	811	EEF35926.1	protein with unknown function	Ricinus communis	215	392	e-107	0.92	0.95	1	sp|O04486	RAA2A_ARATH Ras-related protein RABA2a	Arabidopsisthaliana	217	382	e-105	0.9	0.95	1
13-F07	848	XP_002285918.1	PREDICTED: hypothetical protein	Vitis vinifera	106	159	4e-37	0.9	0.95	2
13-F12	831	XP_002316393.1	predicted protein	Populus trichocarpa	110	157	9e-37	0.66	0.81	3
13-F17	645	XP_002273093.1	PREDICTED: hypothetical protein	Vitis vinifera	368	145	3e-33	0.54	0.68	3
13-F19	902	EEF52363.1	conserved hypothetical protein	Ricinus communis	167	238	8e-61	0.75	0.87	2
13-F21	813	XP_002280820.1	PREDICTED: hypothetical protein	Vitis vinifera	140	189	3e-46	0.76	0.85	1
13-F22	555	EEF49902.1	conserved hypothetical protein	Ricinus communis	306	156	1e-36	0.66	0.8	2
13-G11	837	XP_002285084.1	PREDICTED: hypothetical protein	Vitis vinifera	791	503	e-141	0.84	0.92	3	sp|Q9SCV4	BGAL8_ARATH Beta-galactosidase 8	Arabidopsis thalian	852	490	e-138	0.81	0.89	3
13-G22	883	XP_002326664.1	predicted protein	Populus trichocarpa	227	350	8e-95	0.78	0.9	1	sp|Q93VG8	U326_ARATH UPF0326 protein At4g17486	Arabidopsisthaliana	224	305	2e-82	0.69	0.86	1
13-H18	879	XP_002282229.1	PREDICTED: hypothetical protein	Vitis vinifera	545	325	5e-87	0.71	0.87	3	sp|Q8GZD4	NAT3_ARATH Nucleobase-ascorbate transporter 3	Arabidopsis thaliana	551	304	5e-82	0.71	0.82	3
13-I09	702	XP_002320528.1	predicted protein	Populus trichocarpa	401	197	1e-48	0.91	0.97	1	sp|Q8S4Y1	THIC1_ARATH Acetyl-CoA acetyltransferase, cytosolic 1	Arabidopsis thaliana	403	186	2e-46	0.85	0.94	1
13-I18	808	XP_002310932.1	predicted protein	Populus trichocarpa	401	338	3e-91	0.6	0.77	2	sp|Q5QQ56	XYLT1_CANFA Xylosyltransferase 1	Canis familiari	950	86.7	2e-16	0.28	0.49	2
13-J14	788	XP_002277442.1	PREDICTED: hypothetical protein	Vitis vinifera	601	109	3e-22	0.4	0.51	2
13-J17	745	EEF49176.1	protein with unknown function	Ricinus communis	223	304	6e-81	0.88	0.96	1	sp|P25766	RGP1_ORYSJ Ras-related protein RGP1	Oryza sativasubsp. japonica	226	286	8e-77	0.87	0.96	1
13-J21	676	XP_002315113.1	predicted protein	Populus trichocarpa	191	245	2e-63	0.67	0.76	2
13-K03	859	XP_002271355.1	PREDICTED: hypothetical protein	Vitis vinifera	576	139	5e-31	0.41	0.53	1
13-K08	571	XP_002274030.1	PREDICTED: hypothetical protein	Vitis vinifera	545	153	1e-35	0.84	0.91	2
13-K09	858	XP_002302889.1	predicted protein	Populus trichocarpa	287	446	e-123	0.8	0.9	2	sp|P54001	P4HA1_RAT Prolyl 4-hydroxylase subunit alpha-1	Rattusnorvegicus	534	112	3e-24	0.34	0.49	2
13-K10	496	XP_002329194.1	predicted protein	Populus trichocarpa	524	103	6e-21	0.85	0.98	2	sp|Q5R4B3	ERF3B_PONAB Eukaryotic peptide chain release factorGTP-binding subunit ERF3B	Pongo abelii	628	63.9	5e-10	0.59	0.71	2
13-K21	744	EEF29911.1	conserved hypothetical protein	Ricinus communis	1183	366	1e-99	0.72	0.87	2
13-L07	447	XP_002310513.1	predicted protein	Populus trichocarpa	630	296	6e-79	0.89	0.95	2	sp|O15488	GLYG2_HUMAN Glycogenin-2	Homo sapiens	501	76.3	7e-14	0.37	0.53	2
13-L15	695	XP_002263415.1	PREDICTED: hypothetical protein	Vitis vinifera	922	117	1e-24	0.59	0.8	1
13-M09	802	XP_002279005.1	PREDICTED: similar to ftsH-like protease	Vitis vinifera	713	445	e-123	0.85	0.9	2	sp|O80983	FTSH4_ARATH ATP-dependent zinc metalloprotease FTSH 4,mitochondrial	Arabidopsis thaliana	717	444	e-124	0.85	0.9	2
13-M16	845	XP_002282252.1	PREDICTED: hypothetical protein	Vitis vinifera	474	367	e-100	0.7	0.78	2	sp|Q54ED4	GRWD1_DICDI Glutamate-rich WD repeat-containing protein 1	Dictyostelium discoideum	482	164	9e-40	0.37	0.52	2
13-M21	677	XP_002313079.1	predicted protein	Populus trichocarpa	204	247	7e-64	0.65	0.74	1
13-N01	517	EEF45949.1	conserved hypothetical protein	Ricinus communis	194	90.1	8e-17	0.67	0.76	2
13-N04	765	EEF42619.1	conserved hypothetical protein	Ricinus communis	414	271	4e-71	0.64	0.69	3	sp|Q9FNK5	FB285_ARATH F-box protein At5g46170	Arabidopsisthaliana	395	258	2e-68	0.6	0.68	3
13-N06	799	NP_563805.1	unknown protein	Arabidopsis thaliana	382	439	e-145	0.89	0.95	2
13-N10	570	EEF23100.1	conserved hypothetical protein	Ricinus communis	102	98.2	4e-19	0.78	0.88	-3	sp|Q01911	TETX_BACFR Tetracycline resistance protein fromtransposon Tn4351/Tn4400	Bacteroides fragilis	388	58.9	2e-08	0.46	0.68	-3
13-N12	726	EEF32339.1	conserved hypothetical protein	Ricinus communis	395	378	e-103	0.85	0.93	3
13-O08	828	EEF41527.1	conserved hypothetical protein	Ricinus communis	204	242	3e-62	0.64	0.73	1	sp|P20144	WUN1_SOLTU Wound-induced protein 1	Solanum tuberosu	105	137	9e-32	0.56	0.68	1
13-O09	861	YP_002870461.1	hypothetical protein PFLU0797	Pseudomonas fluorescens SBW25	716	399	e-109	0.74	0.81	1
13-O15	410	XP_002315310.1	predicted protein	Populus trichocarpa	341	66.2	1e-09	0.93	1	2	sp|Q9LZG0	ADK2_ARATH Adenosine kinase 2	Arabidopsis thalian	345	63.9	3e-10	0.86	1	2
13-O18	753	XP_002324678.1	predicted protein	Populus trichocarpa	176	232	2e-59	0.77	0.84	1	sp|Q5ZJR3	OSTC_CHICK Oligosaccharyltransferase complex subunit OSTC	Gallus gallus	149	116	1e-25	0.42	0.61	1
13-O22	801	XP_002274491.1	PREDICTED: hypothetical protein	Vitis vinifera	340	447	e-124	0.77	0.89	2
13-O24	779	EEF28634.1	conserved hypothetical protein	Ricinus communis	189	143	2e-32	0.47	0.57	3
13-P07	786	NP_883874.1	hypothetical protein BPP1594	Bordetella parapertussis 12822	530	316	2e-84	0.64	0.74	-2	sp|P0AEC0	YOAE_ECOLI UPF0053 inner membrane protein yoaE	Escherichia coli (strain K12)	518	169	2e-41	0.39	0.53	-2
13-P12	184	EEF52436.1	conserved hypothetical protein	Ricinus communis	238	70.5	5e-11	0.7	0.85	1	sp|Q9SX77	UMP6_ARATH Uncharacterized protein At1g47420,mitochondrial	Arabidopsis thaliana	257	59.7	5e-09	0.61	0.77	1
13-P18	643	CAO46402.1	unnamed protein product	Vitis vinifera	320	220	9e-56	0.53	0.68	1	sp|Q9SE93	PNAE_RAUSE Polyneuridine-aldehyde esterase	Rauvolfiaserpentina	264	164	6e-40	0.37	0.59	1
13-P22	564	EEF39805.1	conserved hypothetical protein	Ricinus communis	484	236	7e-61	0.74	0.78	1
14-A05	796	EEF51268.1	conserved hypothetical protein	Ricinus communis	260	272	2e-71	0.62	0.68	1	sp|Q9SH59	RTNLC_ARATH Reticulon-like protein B3	Arabidopsisthaliana	255	243	1e-63	0.57	0.65	1
14-A19	721	XP_002282754.1	PREDICTED: hypothetical protein	Vitis vinifera	304	334	4e-90	0.67	0.78	1
14-B12	338	XP_002279162.1	PREDICTED: hypothetical protein	Vitis vinifera	407	77	6e-13	0.68	0.93	2	sp|Q9SHJ8	HIBC8_ARATH 3-hydroxyisobutyryl-CoA hydrolase-likeprotein 5	Arabidopsis thaliana	387	55.8	8e-08	0.6	0.79	2
14-B13	721	EEF52209.1	conserved hypothetical protein	Ricinus communis	135	124	8e-27	0.45	0.63	2	sp|Q9T068	EPFL2_ARATH EPIDERMAL PATTERNING FACTOR-like protein 2	Arabidopsis thaliana	128	91.3	6e-18	0.54	0.65	2
14-C14	815	XP_002302634.1	predicted protein	Populus trichocarpa	490	292	2e-77	0.6	0.74	3	sp|Q766C2	NEP2_NEPGR Aspartic proteinase nepenthesin-2	Nepenthesgracilis	438	138	5e-32	0.39	0.51	3
14-C15	682	XP_002265533.1	PREDICTED: hypothetical protein	Vitis vinifera	1830	264	6e-69	0.65	0.78	3	sp|Q42463	DCL_SOLLC Protein DCL, chloroplastic	Solanumlycopersicum	224	107	9e-23	0.42	0.61	3
14-C20	835	ABK94599.1	unknown	Populus trichocarpa	268	406	e-111	0.79	0.89	2	sp|Q6GNT2	CL049_XENLA UPF0454 protein C12orf49 homolog	Xenopuslaevis	205	80.9	1e-14	0.39	0.54	2
14-C21	627	XP_002276238.1	PREDICTED: hypothetical protein	Vitis vinifera	1474	105	4e-21	0.58	0.64	1
14-C22	841	XP_002299802.1	predicted protein	Populus trichocarpa	726	428	e-118	0.75	0.81	3	sp|Q9LUZ4	C3H66_ARATH Zinc finger CCCH domain-containing protein 66	Arabidopsis thaliana	607	248	4e-65	0.53	0.62	3
14-D02	507	XP_002317561.1	predicted protein	Populus trichocarpa	1187	94.4	4e-18	0.45	0.59	1
14-D04	673	XP_002262879.1	PREDICTED: hypothetical protein	Vitis vinifera	625	191	5e-47	0.96	0.98	1	sp|P58021	TM9S2_MOUSE Transmembrane 9 superfamily member 2	Musmusculus	662	99.4	2e-20	0.46	0.66	1
14-D06	749	AAM64560.1	unknown	Arabidopsis thaliana	177	136	2e-30	0.49	0.57	3
14-D15	646	XP_002263287.1	PREDICTED: hypothetical protein	Vitis vinifera	417	258	2e-67	0.84	0.94	1	sp|A1L272	S29A4_DANRE Equilibrative nucleoside transporter 4	Danio rerio	518	85.1	3e-16	0.34	0.56	1
14-F15	785	XP_002280220.1	PREDICTED: hypothetical protein	Vitis vinifera	312	171	7e-41	0.87	0.97	1	sp|Q40784	AAPC_CENCI Putative glucose-6-phosphate 1-epimerase	Cenchrus ciliaris	329	105	3e-22	0.65	0.79	1
14-G06	362	CAN71236.1	hypothetical protein	Vitis vinifera	191	54.3	4e-06	0.48	0.67	3
14-G10	634	XP_002273530.1	PREDICTED: hypothetical protein	Vitis vinifera	226	348	2e-94	0.9	0.95	3	sp|Q40191	RB11A_LOTJA Ras-related protein Rab11A	Lotus japonicu	226	340	6e-93	0.86	0.95	3
14-G12	871	XP_002280468.1	PREDICTED: hypothetical protein	Vitis vinifera	445	384	e-105	0.78	0.84	1	sp|P49597	P2C56_ARATH Protein phosphatase 2C 56	Arabidopsisthaliana	434	207	6e-53	0.55	0.67	1
14-G19	721	XP_002314686.1	predicted protein	Populus trichocarpa	329	81.3	8e-14	0.57	0.7	2
14-H04	757	XP_002326087.1	predicted protein	Populus trichocarpa	289	415	e-114	0.9	0.96	2	sp|Q8LDW9	XTH9_ARATH Xyloglucan endotransglucosylase/hydrolaseprotein 9	Arabidopsis thaliana	290	367	e-101	0.82	0.92	2
14-H07	620	XP_002310326.1	predicted protein	Populus trichocarpa	410	363	6e-99	0.85	0.93	3	sp|Q9M401	BCAT3_ARATH Branched-chain-amino-acid aminotransferase 3,chloroplastic	Arabidopsis thaliana	413	343	5e-94	0.83	0.91	3
14-H11	566	XP_002307589.1	predicted protein	Populus trichocarpa	174	206	9e-52	0.61	0.7	3
14-H12	484	EEF45197.1	conserved hypothetical protein	Ricinus communis	76	90.5	5e-17	0.85	0.95	3
14-I06	228	AAM67011.1	unknown	Arabidopsis thaliana	192	53.9	5e-06	0.7	0.9	1
14-I22	826	XP_002317160.1	predicted protein	Populus trichocarpa	568	404	e-111	0.8	0.86	3	sp|Q41141	PFPB_RICCO Pyrophosphate--fructose 6-phosphate1-phosphotransferase subunit beta	Ricinus communi	552	385	e-106	0.8	0.87	3
14-J02	856	XP_002281297.1	PREDICTED: hypothetical protein	Vitis vinifera	438	445	e-123	0.91	0.91	1	sp|P54672	AP2M_DICDI AP-2 complex subunit mu	Dictyosteliumdiscoideum	439	215	4e-55	0.45	0.68	1
14-J04	659	XP_002282341.1	PREDICTED: hypothetical protein	Vitis vinifera	678	224	4e-57	0.76	0.86	3	sp|O45244	DHX16_CAEEL Probable pre-mRNA-splicing factorATP-dependent RNA helicase mog-4	Caenorhabditiselegans	1008	165	3e-40	0.56	0.71	3
14-J19	818	XP_002442943.1	hypothetical protein SORBIDRAFT_08g005190	Sorghum bicolor	354	103	3e-20	0.45	0.57	2	sp|Q42546	DPNP1_ARATH SAL1 phosphatase	Arabidopsis thalian	353	94.7	7e-19	0.47	0.59	2
14-K18	833	XP_002283191.1	PREDICTED: hypothetical protein	Vitis vinifera	1065	414	e-114	0.93	0.97	2	sp|Q9ZW06	PUM2_ARATH Pumilio homolog 2	Arabidopsis thalian	972	390	e-108	0.87	0.94	2
14-K19	711	XP_002326745.1	predicted protein	Populus trichocarpa	313	98.2	6e-19	0.56	0.59	1	sp|Q9FVR6	Y1222_ARATH Uncharacterized protein At1g32220,chloroplastic	Arabidopsis thaliana	296	80.1	1e-14	0.51	0.61	1
14-K22	754	EEF49932.1	conserved hypothetical protein	Ricinus communis	220	234	2e-70	0.8	0.83	2	sp|Q84J70	DI193_ARATH Protein DEHYDRATION-INDUCED 19 homolog 3	Arabidopsis thaliana	223	201	6e-51	0.65	0.77	2
14-L03	655	XP_002285072.1	PREDICTED: hypothetical protein	Vitis vinifera	428	392	e-107	0.98	0.99	2	sp|Q9LFN6	RH56_ARATH DEAD-box ATP-dependent RNA helicase 56	Arabidopsis thaliana	427	390	e-108	0.98	0.99	2
14-L20	735	XP_002445936.1	hypothetical protein SORBIDRAFT_07g028340	Sorghum bicolor	734	175	3e-42	0.91	0.93	2	sp|Q9FMA3	PEX5_ARATH Peroxisome biogenesis protein 5	Arabidopsisthaliana	728	169	2e-41	0.86	0.93	2
14-L21	739	EEF32339.1	conserved hypothetical protein	Ricinus communis	395	57.8	1e-06	0.5	0.61	1
14-N05	809	XP_002284075.1	PREDICTED: hypothetical protein	Vitis vinifera	311	159	3e-37	0.62	0.68	1
14-N13	565	XP_002301485.1	predicted protein	Populus trichocarpa	187	265	2e-69	0.94	0.99	2	sp|P42791	RL182_ARATH 60S ribosomal protein L18-2	Arabidopsisthaliana	187	246	5e-65	0.85	0.97	2
14-N16	825	XP_002269221.1	PREDICTED: hypothetical protein	Vitis vinifera	356	402	e-110	0.98	1	1	sp|P43291	SRK2A_ARATH Serine/threonine-protein kinase SRK2A	Arabidopsis thaliana	363	389	e-107	0.95	0.97	1
14-O13	738	XP_002303265.1	predicted protein	Populus trichocarpa	350	315	2e-84	0.9	0.93	3	sp|Q5XIG8	STRAP_RAT Serine-threonine kinase receptor-associatedprotein	Rattus norvegicus	350	190	7e-48	0.54	0.75	3
14-O14	780	CAO65824.1	unnamed protein product	Vitis vinifera	325	375	e-102	0.68	0.78	1	sp|Q6GNF1	SEH1B_XENLA Nucleoporin seh1-B	Xenopus laevi	360	99.4	2e-20	0.26	0.47	1
14-P06	763	EEF30820.1	conserved hypothetical protein	Ricinus communis	421	268	4e-70	0.59	0.73	3
14-P07	666	XP_002318548.1	predicted protein	Populus trichocarpa	396	176	1e-42	0.55	0.62	3	sp|Q8BIQ5	CSTF2_MOUSE Cleavage stimulation factor subunit 2	Musmusculus	580	50.4	1e-05	0.33	0.61	3
14-P09	778	XP_002282641.1	PREDICTED: similar to ribosomal protein L10a	Vitis vinifera	216	359	2e-97	0.84	0.88	2	sp|P59231	R10A3_ARATH 60S ribosomal protein L10a-3	Arabidopsisthaliana	217	350	6e-96	0.82	0.87	2
14-P11	448	XP_002307520.1	predicted protein	Populus trichocarpa	322	123	5e-27	0.8	0.89	3	sp|A6QP05	DHR12_BOVIN Dehydrogenase/reductase SDR family member 12	Bos taurus	317	55.8	9e-08	0.42	0.55	3
14-P21	721	XP_002301079.1	predicted protein	Populus trichocarpa	220	352	1e-95	0.76	0.85	3	sp|Q7QBJ0	U483_ANOGA UPF0483 protein AGAP003155	Anophelesgambiae	266	87.8	6e-17	0.34	0.47	3
14-P24	771	XP_002274298.1	PREDICTED: hypothetical protein	Vitis vinifera	583	306	2e-81	0.62	0.72	2
15-A03	661	XP_002328416.1	predicted protein	Populus trichocarpa	380	361	3e-98	0.77	0.87	2	sp|Q3ECP6	GDL22_ARATH GDSL esterase/lipase At1g54790	Arabidopsisthaliana	408	293	7e-79	0.63	0.77	2
15-A06	636	XP_002301850.1	predicted protein	Populus trichocarpa	108	150	8e-35	0.72	0.83	1	sp|Q9FNC9	TO222_ARATH Mitochondrial import receptor subunit TOM22homolog 2	Arabidopsis thaliana	99	122	2e-27	0.74	0.86	1
15-A22	829	XP_002280917.1	PREDICTED: hypothetical protein	Vitis vinifera	322	331	6e-89	0.83	0.87	1	sp|Q86YJ5	MARH9_HUMAN E3 ubiquitin-protein ligase MARCH9	Homosapiens	346	52	5e-06	0.24	0.45	1
15-A24	704	XP_002277734.1	PREDICTED: hypothetical protein	Vitis vinifera	429	115	5e-24	0.57	0.73	1	sp|Q9FLE8	Y5986_ARATH Uncharacterized protein At5g39865	Arabidopsis thaliana	390	90.9	7e-18	0.72	0.83	1
15-B10	467	XP_002275617.1	PREDICTED: hypothetical protein	Vitis vinifera	1018	148	2e-34	0.78	0.86	2	sp|P93028	UBE11_ARATH Ubiquitin-activating enzyme E1 1	Arabidopsisthaliana	1080	136	6e-32	0.72	0.84	2
15-B12	355	AAD25667.1	hypothetical protein	Arabidopsis thaliana	435	171	2e-41	0.8	0.93	2
15-B13	571	EEF36910.1	conserved hypothetical protein	Ricinus communis	293	135	3e-30	0.42	0.61	1
15-B19	796	XP_002300382.1	predicted protein	Populus trichocarpa	213	316	1e-84	0.76	0.9	3	sp|Q63524	TMED2_RAT Transmembrane emp24 domain-containing protein 2	Rattus norvegicus	201	72.4	3e-12	0.28	0.5	3
15-C04	728	XP_002271151.1	PREDICTED: similar to OSJNBa0064D20.9	Vitis vinifera	593	83.2	2e-14	0.68	0.86	3	sp|Q54RJ1	CNRB_DICDI CLPTM1-like membrane protein cnrB	Dictyostelium discoideum	619	63.9	1e-09	0.71	0.84	-1
15-C05	813	XP_002329210.1	predicted protein	Populus trichocarpa	195	197	1e-48	0.7	0.8	1	sp|Q09442	SF3B4_CAEEL Splicing factor 3B subunit 4	Caenorhabditis elegans	388	73.6	2e-12	0.36	0.66	1
15-C09	607	EEF29239.1	conserved hypothetical protein	Ricinus communis	177	242	1e-62	0.8	0.88	2
15-C10	803	XP_002279266.1	PREDICTED: hypothetical protein	Vitis vinifera	223	437	e-121	0.94	0.98	3	sp|O82531	PSB1_PETHY Proteasome subunit beta type-1	Petuniahybrida	223	419	e-116	0.91	0.96	3
15-C14	714	XP_002298335.1	predicted protein	Populus trichocarpa	319	300	1e-79	0.88	0.98	3	sp|P48482	PP12_ARATH Serine/threonine-protein phosphatase PP1isozyme 2	Arabidopsis thaliana	312	296	9e-80	0.87	0.97	3
15-C21	495	XP_002270014.1	PREDICTED: hypothetical protein	Vitis vinifera	841	159	7e-38	0.76	0.88	2	sp|Q9STX5	ENPL_ARATH Endoplasmin homolog	Arabidopsis thalian	823	62.4	1e-09	0.34	0.53	2
15-C24	767	XP_002322720.1	predicted protein	Populus trichocarpa	975	196	2e-78	0.72	0.79	3	sp|O81645	VILI3_ARATH Villin-3	Arabidopsis thaliana	966	194	7e-75	0.48	0.54	3
15-D20	562	XP_002316127.1	predicted protein	Populus trichocarpa	196	164	5e-39	0.69	0.8	1	sp|O13737	YDR2_SCHPO Uncharacterized endoplasmic reticulum membraneprotein C16E8.02	Schizosaccharomyces pomb	222	71.2	4e-12	0.46	0.62	1
15-E01	710	XP_002320784.1	predicted protein	Populus trichocarpa	193	178	5e-43	0.73	0.79	1	sp|O80837	REMO_ARATH Remorin	Arabidopsis thaliana	190	154	4e-37	0.64	0.71	1
15-E05	774	XP_002304026.1	predicted protein	Populus trichocarpa	394	441	e-122	0.85	0.92	3	sp|P80030	FABI_BRANA Enoyl-[acyl-carrier-protein] reductase [NADH],chloroplastic	Brassica napus	385	422	e-117	0.82	0.88	3
15-E08	648	XP_002282219.1	PREDICTED: hypothetical protein	Vitis vinifera	460	288	3e-76	0.63	0.76	1	sp|Q9LZ72	KCS21_ARATH 3-ketoacyl-CoA synthase 21	Arabidopsisthaliana	464	262	1e-69	0.58	0.75	1
15-E15	811	XP_002320503.1	predicted protein	Populus trichocarpa	196	157	5e-61	0.79	0.9	2	sp|A7SLC8	NAT9_NEMVE N-acetyltransferase 9-like protein	Nematostella vectensis	198	104	2e-38	0.52	0.69	2
15-E19	687	EEF34747.1	conserved hypothetical protein	Ricinus communis	753	71.2	7e-11	0.55	0.76	3	sp|Q9FIQ1	UBP21_ARATH Ubiquitin carboxyl-terminal hydrolase 21	Arabidopsis thaliana	732	61.2	6e-09	0.49	0.64	3
15-F08	530	ZP_04373957.1	hypothetical protein CaciDRAFT_55300	Catenulispora acidiphila DSM44928	313	60.8	5e-08	0.33	0.5	3
15-F13	872	XP_002282043.1	PREDICTED: hypothetical protein isoform 1	Vitis vinifera	208	204	7e-51	0.87	0.94	3	sp|Q84JP1	NFYA7_ARATH Nuclear transcription factor Y subunit A-7	Arabidopsis thaliana	190	164	6e-40	0.7	0.81	3
15-G01	816	XP_002305487.1	predicted protein	Populus trichocarpa	266	232	3e-59	0.7	0.86	1
15-G15	686	XP_002325846.1	predicted protein	Populus trichocarpa	304	170	6e-71	0.68	0.83	3	sp|Q8VZU2	SY132_ARATH Syntaxin-132	Arabidopsis thalian	304	159	1e-67	0.65	0.8	3
15-H19	712	XP_002276211.1	PREDICTED: hypothetical protein	Vitis vinifera	315	288	4e-76	0.8	0.84	3
15-I01	336	XP_002299451.1	predicted protein	Populus trichocarpa	312	62.4	1e-08	0.59	0.7	3
15-I15	803	XP_002264558.1	PREDICTED: hypothetical protein	Vitis vinifera	404	359	1e-97	0.77	0.82	1	sp|P55034	PSMD4_ARATH 26S proteasome non-ATPase regulatory subunit4	Arabidopsis thaliana	386	337	4e-92	0.74	0.81	1
15-I20	562	XP_002305781.1	predicted protein	Populus trichocarpa	596	238	7e-72	0.69	0.87	2
15-I22	707	EEF46460.1	conserved hypothetical protein	Ricinus communis	318	135	3e-30	0.37	0.48	2
15-J15	832	EEF44737.1	hypothetical protein RCOM_0897890	Ricinus communis	473	187	1e-45	0.65	0.79	3
15-K15	690	CAO43715.1	unnamed protein product	Vitis vinifera	314	198	4e-49	0.6	0.69	3
15-L04	348	XP_002271670.1	PREDICTED: hypothetical protein isoform 2	Vitis vinifera	232	85.1	2e-15	0.95	1	2	sp|P29345	RS6_TOBAC 40S ribosomal protein S6 (Fragment)	Nicotiana tabacum	199	80.9	2e-15	0.87	1	2
15-L11	787	XP_002321923.1	predicted protein	Populus trichocarpa	592	397	e-109	0.73	0.8	3
15-L21	581	XP_002282598.1	PREDICTED: hypothetical protein	Vitis vinifera	204	134	5e-30	0.68	0.74	1	sp|Q6Z461	SPL13_ORYSJ Squamosa promoter-binding-like protein 13	Oryza sativa subsp. japonica	216	126	1e-28	0.52	0.63	1
15-M02	729	XP_002283120.1	PREDICTED: hypothetical protein	Vitis vinifera	466	260	1e-67	0.63	0.76	3	sp|Q7NGP3	MURA_GLOVI UDP-N-acetylglucosamine1-carboxyvinyltransferase	Gloeobacter violaceu	459	161	4e-39	0.48	0.65	3
15-M03	859	XP_002269363.1	PREDICTED: hypothetical protein	Vitis vinifera	589	317	9e-85	0.57	0.73	2	sp|Q9MA75	VIP1_ARATH Transcription factor VIP1	Arabidopsisthaliana	341	62.8	3e-09	0.45	0.57	2
15-M04	747	EEF38297.1	conserved hypothetical protein	Ricinus communis	707	390	e-107	0.72	0.85	3
15-M09	849	XP_002283590.1	PREDICTED: hypothetical protein	Vitis vinifera	377	486	e-135	0.92	0.94	1	sp|O81221	ACT_GOSHI Actin	Gossypium hirsutum	377	484	e-136	0.93	0.94	1
15-M10	717	XP_002268591.1	PREDICTED: hypothetical protein	Vitis vinifera	740	374	e-102	0.81	0.87	3	sp|Q9LKF9	CPSF2_ARATH Cleavage and polyadenylation specificityfactor subunit 2	Arabidopsis thaliana	739	359	1e-98	0.77	0.86	3
15-M18	714	XP_002278379.1	PREDICTED: hypothetical protein	Vitis vinifera	1068	362	2e-98	0.8	0.85	1	sp|P33174	KIF4_MOUSE Chromosome-associated kinesin KIF4	Musmusculus	1231	146	1e-34	0.37	0.6	1
15-N01	776	XP_002303520.1	predicted protein	Populus trichocarpa	592	355	2e-96	0.81	0.83	1	sp|Q9SU40	SKU5_ARATH Monocopper oxidase-like protein SKU5	Arabidopsis thaliana	587	328	3e-89	0.74	0.81	1
15-N11	812	EEF49227.1	conserved hypothetical protein	Ricinus communis	385	342	3e-92	0.76	0.87	3
15-O17	661	XP_002308326.1	predicted protein	Populus trichocarpa	306	204	4e-51	0.74	0.87	2	sp|Q9ZSD4	SY121_ARATH Syntaxin-121	Arabidopsis thalian	346	181	5e-45	0.76	0.92	2
15-O22	694	ABK96261.1	unknown	Populus trichocarpa x Populus deltoides	369	201	5e-50	0.55	0.63	2
15-P01	767	XP_002317918.1	predicted protein	Populus trichocarpa	352	415	e-114	0.89	0.93	3	sp|P57760	STK16_RAT Serine/threonine-protein kinase 16	Rattusnorvegicus	305	132	3e-30	0.35	0.54	3
15-P15	667	XP_002283671.1	PREDICTED: hypothetical protein	Vitis vinifera	254	357	4e-97	0.79	0.86	2	sp|P21820	TPIS_COPJA Triosephosphate isomerase, cytosolic	Coptisjaponica	253	350	5e-96	0.78	0.87	2
15-P22	707	XP_002270419.1	PREDICTED: hypothetical protein	Vitis vinifera	789	402	e-110	0.82	0.89	3	sp|Q9SUI2	PI5K7_ARATH Phosphatidylinositol-4-phosphate 5-kinase 7	Arabidopsis thaliana	754	389	e-108	0.8	0.88	3
16-A01	674	XP_002300309.1	predicted protein	Populus trichocarpa	602	205	3e-51	0.8	0.9	3	sp|A0L5G0	GATA_MAGSM Glutamyl-tRNA(Gln) amidotransferase subunit A	Magnetococcus sp. (strain MC-1)	485	80.1	1e-14	0.47	0.6	3
16-A03	836	YP_002874846.1	hypothetical protein PFLU5347	Pseudomonas fluorescens SBW25	416	450	e-125	0.85	0.87	-3	sp|Q3Z4K2	ENTS_SHISS Enterobactin exporter EntS	Shigella sonnei(strain Ss046)	416	70.9	1e-11	0.26	0.42	-3
16-A08	762	XP_002314542.1	predicted protein	Populus trichocarpa	786	322	2e-86	0.67	0.78	3	sp|Q9CAG5	PUB7_ARATH U-box domain-containing protein 7	Arabidopsisthaliana	782	315	2e-85	0.66	0.78	3
16-A14	689	XP_002264014.1	PREDICTED: hypothetical protein, partial	Vitis vinifera	225	257	7e-67	0.64	0.73	1	sp|Q9M2Y6	Y3972_ARATH Uncharacterized protein At3g49720	Arabidopsis thaliana	261	234	4e-61	0.58	0.7	1
16-A15	750	XP_002284200.1	PREDICTED: hypothetical protein	Vitis vinifera	473	246	e-116	0.87	0.94	2	sp|P45621	GSA_SOYBN Glutamate-1-semialdehyde 2,1-aminomutase,chloroplastic	Glycine max	466	236	e-111	0.83	0.91	2
16-A18	599	XP_002275514.1	PREDICTED: hypothetical protein	Vitis vinifera	176	190	8e-47	0.74	0.86	1
16-A23	498	XP_002276600.1	PREDICTED: hypothetical protein	Vitis vinifera	871	219	6e-56	0.87	0.9	3	sp|P52296	IMB1_RAT Importin subunit beta-1	Rattus norvegicu	875	65.1	2e-10	0.33	0.47	3
16-B04	805	XP_002301867.1	predicted protein	Populus trichocarpa	736	372	e-101	0.74	0.86	2	sp|Q9LN50	PMTS_ARATH Probable methyltransferase PMT28	Arabidopsis thaliana	724	340	9e-93	0.71	0.82	2
16-B09	399	EEF42768.1	conserved hypothetical protein	Ricinus communis	246	62.4	1e-08	0.63	0.78	2
16-B12	707	ABK93223.1	unknown	Populus trichocarpa	129	132	3e-29	0.58	0.7	1	sp|Q02921	NO93_SOYBN Early nodulin-93	Glycine max	105	100	9e-21	0.59	0.71	1
16-B15	522	XP_002283882.1	PREDICTED: hypothetical protein	Vitis vinifera	386	132	2e-29	0.55	0.65	1
16-C10	467	CAO48945.1	unnamed protein product	Vitis vinifera	531	86.7	7e-16	0.41	0.6	3
16-D05	775	XP_002264072.1	PREDICTED: hypothetical protein	Vitis vinifera	782	303	9e-81	0.61	0.73	1	sp|Q9XED8	ARFI_ARATH Auxin response factor 9	Arabidopsisthaliana	638	163	1e-39	0.4	0.53	1
16-E01	793	XP_002263488.1	PREDICTED: hypothetical protein isoform 3	Vitis vinifera	99	103	2e-20	1	1	1	sp|Q54HF6	LSM7_DICDI Probable U6 snRNA-associated Sm-like proteinLSm7	Dictyostelium discoideum	97	66.6	2e-10	0.54	0.76	1
16-F04	850	XP_002315688.1	predicted protein	Populus trichocarpa	332	263	2e-68	0.57	0.66	1
16-G07	357	XP_002277195.1	PREDICTED: hypothetical protein	Vitis vinifera	704	164	3e-39	0.69	0.86	1	sp|P41891	GAR2_SCHPO Protein gar2	Schizosaccharomyces pomb	500	73.6	4e-13	0.39	0.53	1
16-G17	790	XP_002266715.1	PREDICTED: hypothetical protein	Vitis vinifera	615	234	9e-60	0.88	0.94	2	sp|Q5F259	AN13B_MOUSE Ankyrin repeat domain-containing protein 13B	Mus musculus	626	53.9	1e-06	0.41	0.58	2
16-G23	766	CAN72346.1	hypothetical protein	Vitis vinifera	247	296	1e-78	0.67	0.81	1	sp|Q946Y7	SYP61_ARATH Syntaxin-61	Arabidopsis thaliana	245	275	2e-73	0.64	0.76	1
16-H03	815	XP_002268087.1	PREDICTED: hypothetical protein	Vitis vinifera	608	456	e-126	0.84	0.89	2
16-H13	810	XP_002265425.1	PREDICTED: hypothetical protein	Vitis vinifera	458	191	5e-47	0.5	0.61	1
16-H16	787	XP_002310069.1	predicted protein	Populus trichocarpa	320	96.7	2e-18	0.96	0.96	3	sp|Q9LT17	BBR_ARATH E3 ubiquitin ligase BIG BROTHER-related	Arabidopsis thaliana	340	82.8	2e-15	0.8	0.88	3
16-H20	441	XP_002280787.1	PREDICTED: hypothetical protein	Vitis vinifera	872	58.9	2e-07	0.96	0.96	2
16-I04	766	XP_002330150.1	predicted protein	Populus trichocarpa	933	255	3e-66	0.57	0.64	1
16-J11	776	CAO43844.1	unnamed protein product	Vitis vinifera	508	332	2e-89	0.69	0.79	1	sp|Q96P11	NSUN5_HUMAN Putative methyltransferase NSUN5	Homosapiens	429	114	7e-25	0.35	0.5	1
16-J14	866	EEF43676.1	conserved hypothetical protein	Ricinus communis	531	461	e-130	0.83	0.89	2
16-J20	690	EEF51283.1	conserved hypothetical protein	Ricinus communis	696	211	5e-53	0.58	0.74	2	sp|Q66GQ2	Y5162_ARATH Uncharacterized protein At5g41620	Arabidopsis thaliana	543	92.8	2e-18	0.33	0.48	2
16-K08	537	XP_002464505.1	hypothetical protein SORBIDRAFT_01g019770	Sorghum bicolor	140	263	6e-69	0.98	0.99	1	sp|P49690	RL23_ARATH 60S ribosomal protein L23	Arabidopsisthaliana	140	261	2e-69	0.97	0.99	1
16-L13	579	XP_002316240.1	predicted protein	Populus trichocarpa	112	229	8e-59	0.97	0.99	3	sp|Q9C912	R35A3_ARATH 60S ribosomal protein L35a-3	Arabidopsisthaliana	112	221	2e-57	0.93	0.95	3
16-L22	643	EEF46533.1	conserved hypothetical protein	Ricinus communis	148	208	3e-52	0.7	0.79	2
16-M08	783	EEF35245.1	conserved hypothetical protein	Ricinus communis	352	343	1e-92	0.76	0.87	1
16-M13	673	XP_002276541.1	PREDICTED: hypothetical protein	Vitis vinifera	218	84.3	1e-29	0.67	0.81	3
16-M20	837	XP_002326892.1	predicted protein	Populus trichocarpa	255	338	4e-91	0.68	0.77	3	sp|Q9FZF1	PX11A_ARATH Peroxisomal membrane protein 11A	Arabidopsis thaliana	248	306	1e-82	0.62	0.78	3
16-N01	571	XP_002273213.1	PREDICTED: hypothetical protein	Vitis vinifera	360	92.8	2e-38	0.86	0.9	1	sp|Q0PGJ6	AKRC9_ARATH Aldo-keto reductase family 4 member C9	Arabidopsis thaliana	315	62.4	2e-11	0.57	0.71	1
16-N03	728	EEF46229.1	conserved hypothetical protein	Ricinus communis	1233	290	9e-77	0.74	0.81	1	sp|Q12754	RRP12_YEAST Ribosomal RNA-processing protein 12	Saccharomyces cerevisiae	1228	95.1	4e-19	0.3	0.51	1
16-N06	818	EEF34707.1	conserved hypothetical protein	Ricinus communis	280	304	6e-81	0.64	0.75	3
16-N08	669	XP_002270577.1	PREDICTED: hypothetical protein	Vitis vinifera	308	224	4e-57	0.62	0.73	1	sp|Q9LT17	BBR_ARATH E3 ubiquitin ligase BIG BROTHER-related	Arabidopsis thaliana	340	187	7e-47	0.52	0.65	1
16-O01	798	XP_001072332.1	PREDICTED: hypothetical protein	Rattus norvegicus	479	65.1	7e-09	0.28	0.43	3
16-O03	737	EEF50484.1	conserved hypothetical protein	Ricinus communis	282	296	1e-78	0.62	0.76	3
16-O04	927	XP_002306888.1	predicted protein	Populus trichocarpa	155	166	4e-39	0.66	0.79	2	sp|P24068	OCS1_MAIZE Ocs element-binding factor 1	Zea may	151	83.6	2e-15	0.38	0.56	2
16-O06	453	YP_587531.1	hypothetical protein Rmet_5403	Ralstonia metallidurans CH34	470	145	2e-33	0.48	0.64	-3
16-O14	815	XP_002331820.1	predicted protein	Populus trichocarpa	580	210	1e-52	0.46	0.56	1
16-O21	775	XP_002297817.1	predicted protein	Populus trichocarpa	807	151	6e-35	0.94	0.96	3	sp|P73121	Y1919_SYNY3 Uncharacterized protein slr1919	Synechocystis sp. (strain ATCC 27184 / PCC 6803 /N-1)	566	75.1	5e-13	0.44	0.67	3
16-P01	797	XP_002327390.1	predicted protein	Populus trichocarpa	843	490	e-137	0.91	0.96	2	sp|Q9SA18	AKH1_ARATH Bifunctional aspartokinase/homoserinedehydrogenase 1, chloroplastic	Arabidopsis thalian	911	457	e-128	0.82	0.94	2
16-P02	594	XP_002298508.1	predicted protein	Populus trichocarpa	146	175	3e-42	0.84	0.94	2
16-P05	811	XP_002267872.1	PREDICTED: hypothetical protein	Vitis vinifera	497	412	e-113	0.77	0.89	2	sp|Q8GXR2	PLT6_ARATH Probable polyol transporter 6	Arabidopsisthaliana	493	394	e-109	0.72	0.86	2
16-P09	618	ACJ84781.1	unknown	Medicago truncatula	245	337	4e-91	0.79	0.9	3	sp|Q06AA4	SNRPA_PIG U1 small nuclear ribonucleoprotein A	Susscrofa	282	186	8e-47	0.45	0.59	3
16-P20	817	XP_002302556.1	predicted protein	Populus trichocarpa	358	353	1e-95	0.85	0.91	1	sp|Q16MG9	ASNA_AEDAE ATPase ASNA1 homolog	Aedes aegypt	341	221	4e-57	0.54	0.7	1
16-P24	784	EEF33366.1	conserved hypothetical protein	Ricinus communis	468	199	2e-49	0.57	0.67	3	sp|Q94CC0	Y5994_ARATH Uncharacterized protein At5g49945	Arabidopsis thaliana	480	187	5e-47	0.51	0.63	3
17-A22	755	XP_002310939.1	predicted protein	Populus trichocarpa	524	416	e-114	0.78	0.86	3	sp|Q9C512	MNS1_ARATH Mannosyl-oligosaccharide 1,2-alpha-mannosidaseMNS1	Arabidopsis thaliana	560	379	e-104	0.72	0.81	3
17-A23	561	EEF44364.1	conserved hypothetical protein	Ricinus communis	223	253	9e-66	0.7	0.8	2	sp|Q9H867	CN138_HUMAN Uncharacterized protein C14orf138	Homosapiens	229	73.9	6e-13	0.3	0.5	2
17-B02	686	CAN79460.1	hypothetical protein	Vitis vinifera	154	188	4e-46	0.64	0.72	3
17-B10	864	XP_002284532.1	PREDICTED: hypothetical protein	Vitis vinifera	607	366	2e-99	0.68	0.74	1	sp|Q52JK6	VIP2_NICBE Probable NOT transcription complex subunit VIP2(Fragment)	Nicotiana benthamiana	603	341	4e-93	0.65	0.72	1
17-B12	756	XP_002306551.1	predicted protein	Populus trichocarpa	286	376	e-102	0.73	0.82	2	sp|Q9SGN7	CCR12_ARATH Serine/threonine-protein kinase-like proteinAt1g28390	Arabidopsis thaliana	470	316	1e-85	0.64	0.75	2
17-B14	467	XP_002277291.1	PREDICTED: hypothetical protein	Vitis vinifera	1713	177	3e-43	0.83	0.92	1	sp|Q9LMT9	WAKLL_ARATH Putative wall-associated receptor kinase-like13	Arabidopsis thaliana	764	68.9	1e-11	0.42	0.6	1
17-B21	846	EEF41931.1	protein with unknown function	Ricinus communis	383	238	5e-61	0.64	0.71	1
17-C16	414	AAK48956.1	AF370529_1 Unknown protein	Arabidopsis thaliana	143	163	5e-39	0.92	0.95	1	sp|P39207	NDK1_ARATH Nucleoside diphosphate kinase 1	Arabidopsisthaliana	149	163	3e-40	0.92	0.95	1
17-C20	784	XP_002326937.1	predicted protein	Populus trichocarpa	273	350	8e-95	0.77	0.83	3
17-C24	607	XP_002278607.1	PREDICTED: hypothetical protein	Vitis vinifera	169	74.7	5e-12	0.55	0.69	1
17-D15	826	XP_002270073.1	PREDICTED: hypothetical protein	Vitis vinifera	586	166	2e-39	0.86	0.93	1	sp|Q9LD90	DKC1_ARATH H/ACA ribonucleoprotein complex subunit 4	Arabidopsis thaliana	565	161	4e-39	0.7	0.76	1
17-E05	871	EEF49620.1	conserved hypothetical protein	Ricinus communis	510	319	2e-85	0.53	0.65	2	sp|Q8LPG9	IQD14_ARATH Protein IQ-DOMAIN 14	Arabidopsis thalian	668	107	1e-22	0.29	0.44	2
17-E11	688	XP_002333330.1	predicted protein	Populus trichocarpa	490	244	4e-63	0.8	0.91	3	sp|Q1PF50	EDA2_ARATH Probable serine protease EDA2	Arabidopsisthaliana	489	209	1e-53	0.68	0.82	3
17-E14	852	XP_002273705.1	PREDICTED: hypothetical protein	Vitis vinifera	335	212	4e-53	0.85	0.91	2	sp|Q94C27	FB84_ARATH F-box protein At1g70590	Arabidopsisthaliana	351	174	7e-43	0.71	0.8	2
17-E18	781	XP_002283957.1	PREDICTED: hypothetical protein	Vitis vinifera	606	472	e-131	0.88	0.96	2	sp|P40234	CKI2_SCHPO Casein kinase I homolog 2	Schizosaccharomyces pombe	435	123	2e-27	0.45	0.61	2
17-E24	587	XP_002325911.1	predicted protein	Populus trichocarpa	594	229	9e-59	0.79	0.82	2
17-F19	812	XP_002279127.1	PREDICTED: hypothetical protein, partial	Vitis vinifera	689	465	e-129	0.85	0.94	1	sp|Q9LVI6	RLK90_ARATH Probable inactive receptor kinase RLK902	Arabidopsis thaliana	647	380	e-105	0.72	0.86	1
17-G16	840	XP_002302353.1	predicted protein	Populus trichocarpa	347	271	7e-71	0.58	0.66	3	sp|Q9LSL1	BH093_ARATH Transcription factor bHLH93	Arabidopsisthaliana	351	201	4e-51	0.49	0.59	3
17-G22	730	XP_002285400.1	PREDICTED: hypothetical protein	Vitis vinifera	283	151	5e-35	0.4	0.56	2
17-H14	350	YP_002154053.1	hypothetical protein BCAS0675	Burkholderia cenocepacia J2315	228	129	1e-28	0.54	0.74	-2
17-H17	705	XP_002272347.1	PREDICTED: hypothetical protein	Vitis vinifera	258	263	8e-69	0.75	0.84	1	sp|Q219F9	RL25_RHOPB 50S ribosomal protein L25	Rhodopseudomonaspalustris (strain BisB18)	240	65.5	3e-10	0.26	0.48	1
17-H24	797	CAN80825.1	hypothetical protein	Vitis vinifera	446	367	e-100	0.73	0.84	3	sp|Q9SZG1	GT6_ARATH Glycosyltransferase 6	Arabidopsis thalian	432	335	2e-91	0.74	0.85	3
17-I12	824	XP_002275861.1	PREDICTED: hypothetical protein	Vitis vinifera	317	304	6e-81	0.76	0.87	2	sp|P53611	PGTB2_HUMAN Geranylgeranyl transferase type-2 subunitbeta	Homo sapiens	331	223	1e-57	0.53	0.73	2
17-I15	868	EEF41206.1	conserved hypothetical protein	Ricinus communis	1330	258	5e-67	0.5	0.6	3
17-J01	733	CAN72815.1	hypothetical protein	Vitis vinifera	322	168	5e-40	0.78	0.83	1
17-J08	678	EEF39881.1	hypothetical protein RCOM_1015180	Ricinus communis	1111	230	1e-74	0.85	0.9	2	sp|Q6AWX6	SCAR1_ARATH Protein SCAR1	Arabidopsis thalian	821	197	2e-64	0.69	0.85	2
17-J19	733	CAO63408.1	unnamed protein product	Vitis vinifera	501	60.5	2e-17	0.72	0.9	3	sp|Q39204	RAP1_ARATH Transcription factor MYC2	Arabidopsisthaliana	623	54.3	8e-14	0.6	0.8	3
17-K05	134	XP_002301864.1	predicted protein	Populus trichocarpa	487	86.3	9e-16	0.95	0.97	2	sp|Q9FRL3	ERDL6_ARATH Sugar transporter ERD6-like 6	Arabidopsisthaliana	487	83.2	5e-16	0.9	0.95	2
17-K19	424	XP_002279663.1	PREDICTED: hypothetical protein	Vitis vinifera	716	176	7e-43	0.78	0.86	1
17-L06	506	BAG86806.1	unnamed protein product	Oryza sativa Japonica Group	79	56.6	9e-07	0.44	0.7	1
17-M03	879	XP_002271885.1	PREDICTED: hypothetical protein	Vitis vinifera	461	475	e-132	0.81	0.88	3	sp|Q9LY87	RGLG2_ARATH E3 ubiquitin-protein ligase RGLG2	Arabidopsis thaliana	468	441	e-123	0.76	0.84	3
17-M10	759	XP_002270418.1	PREDICTED: hypothetical protein isoform 1	Vitis vinifera	693	299	2e-79	0.66	0.75	2
17-M12	764	XP_002303779.1	predicted protein	Populus trichocarpa	363	213	2e-53	0.58	0.75	3
17-M18	730	XP_002278176.1	PREDICTED: hypothetical protein	Vitis vinifera	405	428	e-118	0.91	0.97	2	sp|Q8GYX8	DNJ10_ARATH Chaperone protein dnaJ 10	Arabidopsisthaliana	398	390	e-108	0.84	0.93	2
17-N04	716	XP_002283246.1	PREDICTED: hypothetical protein	Vitis vinifera	330	415	e-114	0.94	0.98	3	sp|P35250	RFC2_HUMAN Replication factor C subunit 2	Homo sapien	354	288	2e-77	0.66	0.81	3
17-N08	612	XP_002323754.1	predicted protein	Populus trichocarpa	199	260	5e-68	0.74	0.82	2	sp|O14327	PAB2_SCHPO Polyadenylate-binding protein 2	Schizosaccharomyces pombe	166	127	7e-29	0.46	0.64	2
17-N10	723	XP_002303316.1	predicted protein	Populus trichocarpa	171	90.9	1e-16	0.51	0.69	2	sp|O24408	IAA18_ARATH Auxin-responsive protein IAA18	Arabidopsisthaliana	267	62	4e-09	0.41	0.58	2
17-N17	699	XP_002308249.1	predicted protein	Populus trichocarpa	597	107	7e-22	0.68	0.8	2
17-N22	713	XP_002282663.1	PREDICTED: hypothetical protein	Vitis vinifera	1157	396	e-108	0.82	0.89	1	sp|Q99PI5	LPIN2_MOUSE Phosphatidate phosphatase LPIN2	Mus musculu	893	202	2e-51	0.47	0.66	1
17-O06	668	XP_002271692.1	PREDICTED: hypothetical protein	Vitis vinifera	317	295	2e-78	0.62	0.7	2	sp|Q02283	HAT5_ARATH Homeobox-leucine zipper protein HAT5	Arabidopsis thaliana	272	151	4e-36	0.43	0.58	2
17-O12	807	XP_002273424.1	PREDICTED: hypothetical protein isoform 3	Vitis vinifera	212	198	4e-49	0.54	0.62	1
17-O17	745	XP_002303990.1	predicted protein	Populus trichocarpa	424	446	e-123	0.86	0.93	2
17-O23	740	XP_002331751.1	predicted protein	Populus trichocarpa	266	298	4e-79	0.92	0.99	1	sp|P16924	P4HA1_CHICK Prolyl 4-hydroxylase subunit alpha-1	Gallus gallus	516	102	3e-21	0.4	0.5	1
18-A17	413	XP_002272841.1	PREDICTED: hypothetical protein	Vitis vinifera	386	152	8e-36	0.93	0.96	1	sp|O59413	PFPI_PYRHO Intracellular protease 1	Pyrococcushorikoshii	166	52	1e-06	0.5	0.76	1
18-A21	524	XP_002274367.1	PREDICTED: hypothetical protein isoform 2	Vitis vinifera	148	303	4e-81	0.96	0.99	2	sp|P35135	UBC4_SOLLC Ubiquitin-conjugating enzyme E2-17 kDa	Solanum lycopersicum	148	293	4e-79	0.93	0.97	2
18-B01	781	EEF28091.1	protein with unknown function	Ricinus communis	216	320	7e-86	0.88	0.89	2	sp|P28186	ARA3_ARATH Ras-related protein ARA-3	Arabidopsisthaliana	216	314	5e-85	0.86	0.88	2
18-B14	546	EEF51030.1	conserved hypothetical protein	Ricinus communis	306	103	8e-21	0.47	0.62	1
18-B16	400	EEF43887.1	hypothetical protein RCOM_0905090	Ricinus communis	632	83.2	8e-15	0.86	0.93	3
18-B18	439	XP_002272496.1	PREDICTED: hypothetical protein isoform 1	Vitis vinifera	69	103	6e-21	0.76	0.76	1	sp|P46291	RL38_SOLLC 60S ribosomal protein L38	Solanumlycopersicum	69	103	4e-22	0.76	0.76	1
18-C01	684	XP_002317480.1	predicted protein	Populus trichocarpa	338	258	4e-67	0.82	0.92	2	sp|Q8L493	BCAL3_ARATH Branched-chain-amino-acidaminotransferase-like protein 3, chloroplastic	Arabidopsis thaliana	373	185	3e-46	0.61	0.75	2
18-C02	350	XP_002301801.1	predicted protein	Populus trichocarpa	76	96.3	9e-19	0.97	1	2	sp|Q09020	PR4_PHAVU Wound-induced basic protein	Phaseolusvulgaris	47	92.8	6e-19	0.93	0.95	2
18-C22	418	XP_002283878.1	PREDICTED: hypothetical protein	Vitis vinifera	80	139	7e-32	0.81	0.87	2
18-D09	744	XP_002272290.1	PREDICTED: hypothetical protein	Vitis vinifera	1125	457	e-127	0.87	0.95	2	sp|Q55CT5	SEC31_DICDI Protein transport protein SEC31	Dictyostelium discoideum	1355	224	4e-58	0.43	0.63	2
18-D12	853	XP_002282029.1	PREDICTED: hypothetical protein	Vitis vinifera	315	398	e-109	0.74	0.84	2
18-D14	529	XP_002331664.1	predicted protein	Populus trichocarpa	88	169	8e-41	0.96	1	1	sp|A1XQR9	RUXE_PIG Small nuclear ribonucleoprotein E	Sus scrof	92	127	3e-29	0.72	0.91	1
18-D20	686	XP_002319075.1	predicted protein	Populus trichocarpa	246	260	7e-68	0.7	0.77	3	sp|O24407	IAA16_ARATH Auxin-responsive protein IAA16	Arabidopsisthaliana	236	204	6e-52	0.63	0.71	3
18-E06	707	ACJ84998.1	unknown	Medicago truncatula	249	161	5e-38	0.57	0.75	3
18-E07	665	XP_002266700.1	PREDICTED: hypothetical protein	Vitis vinifera	611	123	2e-26	0.44	0.57	1
18-E12	401	AAL85982.1	unknown protein	Arabidopsis thaliana	74	71.2	3e-11	0.76	0.88	1
18-E14	689	EEF35037.1	conserved hypothetical protein	Ricinus communis	99	116	2e-24	0.61	0.72	2
18-E18	724	XP_002269733.1	PREDICTED: hypothetical protein isoform 2	Vitis vinifera	480	361	3e-98	0.89	0.96	1	sp|Q96558	UGDH_SOYBN UDP-glucose 6-dehydrogenase	Glycine ma	480	347	6e-95	0.85	0.94	1
18-F20	623	AAM64809.1	unknown	Arabidopsis thaliana	194	162	2e-38	0.76	0.88	3	sp|Q9SD84	E13L3_ARATH Glucan endo-1,3-beta-glucosidase-like protein3	Arabidopsis thaliana	194	161	3e-39	0.75	0.88	3
18-F22	757	XP_002264609.1	PREDICTED: hypothetical protein	Vitis vinifera	220	438	e-121	0.94	0.97	3	sp|Q9SPB3	RL10_VITRI 60S ribosomal protein L10	Vitis ripari	220	434	e-121	0.93	0.97	3
18-G09	266	YP_001630211.1	hypothetical protein Bpet1603	Bordetella petrii DSM 12804	739	118	2e-25	0.67	0.8	-1
18-G14	629	XP_002279768.1	PREDICTED: hypothetical protein	Vitis vinifera	821	203	1e-50	0.64	0.7	3	sp|P40228	CSK2B_ARATH Casein kinase II subunit beta	Arabidopsisthaliana	287	175	2e-43	0.58	0.64	3
18-G15	694	XP_002326249.1	predicted protein	Populus trichocarpa	156	239	2e-61	0.88	0.97	1	sp|A5PKK7	GORAB_BOVIN RAB6-interacting golgin	Bos tauru	370	59.7	2e-08	0.29	0.51	1
18-G16	699	NP_567560.2	unknown protein	Arabidopsis thaliana	106	130	1e-28	0.69	0.83	2
18-G23	707	XP_002278566.1	PREDICTED: hypothetical protein	Vitis vinifera	370	331	3e-89	0.79	0.88	1	sp|Q9LFG2	DAPF_ARATH Diaminopimelate epimerase, chloroplastic	Arabidopsis thaliana	362	301	3e-81	0.72	0.81	1
18-H17	558	ABK95923.1	unknown	Populus trichocarpa	418	136	1e-30	0.69	0.85	1	sp|Q7XR60	MTK2_ORYSJ Methylthioribose kinase 2	Oryza sativasubsp. japonica	427	122	1e-27	0.65	0.79	1
18-H23	711	XP_002321820.1	predicted protein	Populus trichocarpa	185	249	1e-64	0.71	0.77	1	sp|P42856	ZB14_MAIZE 14 kDa zinc-binding protein	Zea may	128	187	4e-47	0.74	0.9	1
18-I08	765	XP_002277061.1	PREDICTED: hypothetical protein	Vitis vinifera	541	374	e-102	0.75	0.85	1	sp|Q68KI4	NHX1_ARATH Sodium/hydrogen exchanger 1	Arabidopsisthaliana	538	313	8e-85	0.65	0.75	1
18-I14	703	XP_002282804.1	PREDICTED: hypothetical protein	Vitis vinifera	378	232	2e-59	0.67	0.84	2
18-I18	748	XP_002316375.1	predicted protein	Populus trichocarpa	714	429	e-118	0.88	0.93	3	sp|Q55874	Y103_SYNY3 Uncharacterized protein sll0103	Synechocystis sp. (strain ATCC 27184 / PCC 6803 /N-1)	420	76.3	2e-13	0.29	0.45	3
18-I22	703	EEF38272.1	conserved hypothetical protein	Ricinus communis	2100	298	4e-79	0.87	0.93	2
18-J03	714	XP_002314930.1	predicted protein	Populus trichocarpa	258	130	1e-28	0.61	0.67	2	sp|Q5EB97	ZCH10_RAT Zinc finger CCHC domain-containing protein 10	Rattus norvegicus	173	57.4	9e-08	0.68	0.81	2
18-J05	671	XP_002272388.1	PREDICTED: hypothetical protein	Vitis vinifera	260	160	7e-38	0.54	0.67	2	sp|Q9LKA5	UMP1_ARATH Uncharacterized protein At3g15000,mitochondrial	Arabidopsis thaliana	395	106	1e-22	0.47	0.66	2
18-J21	729	XP_002301843.1	predicted protein	Populus trichocarpa	399	416	e-114	0.85	0.95	2	sp|Q5BK63	NDUA9_RAT NADH dehydrogenase [ubiquinone] 1 alphasubcomplex subunit 9, mitochondrial	Rattus norvegicu	377	188	3e-47	0.49	0.73	2
18-K05	683	YP_002871128.1	hypothetical protein PFLU1483	Pseudomonas fluorescens SBW25	408	424	e-117	0.93	0.97	-2	sp|B2VKI2	SOTB_ERWT9 Probable sugar efflux transporter	Erwiniatasmaniensis (strain DSM 17950 / Et1/99)	394	117	9e-26	0.29	0.47	-2
18-K10	788	XP_002330980.1	predicted protein	Populus trichocarpa	440	307	6e-91	0.88	0.92	3	sp|Q2V452	CIPK3_ARATH CBL-interacting serine/threonine-proteinkinase 3	Arabidopsis thaliana	441	265	7e-78	0.76	0.85	3
18-K12	692	CAO68276.1	unnamed protein product	Vitis vinifera	859	199	2e-49	0.58	0.69	2
18-K17	669	XP_002271610.1	PREDICTED: hypothetical protein isoform 1	Vitis vinifera	195	175	3e-42	0.52	0.6	1
18-K20	569	XP_002309226.1	predicted protein	Populus trichocarpa	554	189	1e-46	0.71	0.84	3	sp|Q9SU79	PAO5_ARATH Probable polyamine oxidase 5	Arabidopsisthaliana	533	158	2e-38	0.61	0.74	3
18-K21	667	EEF52762.1	conserved hypothetical protein	Ricinus communis	423	206	2e-51	0.47	0.63	1
18-L10	787	XP_002458242.1	hypothetical protein SORBIDRAFT_03g029780	Sorghum bicolor	1048	54.7	1e-05	0.67	0.88	3
18-M08	606	EEE58429.1	hypothetical protein OsJ_09630	Oryza sativa Japonica Group	427	363	7e-99	1	1	3	sp|O64937	EF1A_ORYSJ Elongation factor 1-alpha	Oryza sativasubsp. japonica	447	363	e-100	1	1	3
18-M15	466	ACN40426.1	unknown	Picea sitchensis	319	228	2e-58	1	1	2	sp|P33629	TBA_PRUDU Tubulin alpha chain	Prunus dulcis	450	228	1e-59	1	1	2
18-M17	633	XP_002283604.1	PREDICTED: hypothetical protein	Vitis vinifera	1019	389	e-106	0.9	0.95	2	sp|Q9LJM4	IKU2_ARATH Receptor-like protein kinase HAIKU2	Arabidopsis thaliana	991	264	3e-70	0.64	0.76	2
18-M19	550	EEF32069.1	conserved hypothetical protein	Ricinus communis	430	237	5e-61	0.78	0.82	2	sp|Q9NU19	TB22B_HUMAN TBC1 domain family member 22B	Homo sapien	505	95.5	2e-19	0.45	0.6	2
18-M21	853	CAO49494.1	unnamed protein product	Vitis vinifera	325	324	7e-87	0.69	0.76	1	sp|Q54IF9	MYBG_DICDI Myb-like protein G	Dictyostelium discoideu	423	133	2e-30	0.34	0.52	1
18-N07	913	XP_002325202.1	predicted protein	Populus trichocarpa	666	467	e-130	0.74	0.83	1	sp|P03010	TRAC9_MAIZE Putative AC9 transposase	Zea mays	839	111	6e-24	0.33	0.53	1
18-N10	883	XP_002280806.1	PREDICTED: hypothetical protein	Vitis vinifera	931	451	e-125	0.79	0.89	3	sp|Q64623	DUS1_RAT Dual specificity protein phosphatase 1	Rattusnorvegicus	367	85.1	6e-16	0.37	0.54	3
18-N11	748	XP_002279092.1	PREDICTED: hypothetical protein	Vitis vinifera	584	349	2e-94	0.74	0.87	2	sp|Q9M817	PTR6_ARATH Probable peptide transporter At1g52190	Arabidopsis thaliana	607	319	1e-86	0.66	0.82	2
18-N14	802	XP_002266780.1	PREDICTED: similar to elongation factor 2	Vitis vinifera	843	533	e-150	0.95	0.98	3	sp|O23755	EF2_BETVU Elongation factor 2	Beta vulgaris	843	497	e-140	0.88	0.95	3
18-N18	457	ABK21138.1	unknown	Picea sitchensis	108	154	2e-36	0.93	1	2	sp|P46301	RS25_SOLLC 40S ribosomal protein S25	Solanumlycopersicum	108	150	4e-36	0.9	1	2
18-O02	353	XP_002331204.1	predicted protein	Populus trichocarpa	218	156	6e-37	0.9	0.96	2	sp|Q94AU2	SEC22_ARATH 25.3 kDa vesicle transport protein	Arabidopsis thaliana	218	155	7e-38	0.9	0.96	2
18-O05	836	XP_002309684.1	predicted protein	Populus trichocarpa	494	180	1e-43	0.69	0.83	1
18-O07	795	XP_002265752.1	PREDICTED: hypothetical protein	Vitis vinifera	255	126	3e-27	0.69	0.81	1	sp|Q9D099	ACER3_MOUSE Alkaline ceramidase 3	Mus musculu	267	64.3	9e-10	0.35	0.61	1
18-O17	857	XP_002312324.1	predicted protein	Populus trichocarpa	377	218	4e-55	0.84	0.92	3	sp|Q0V7V2	P2C42_ARATH Probable protein phosphatase 2C 42	Arabidopsis thaliana	384	189	2e-47	0.75	0.87	3
18-O19	770	XP_002303466.1	predicted protein	Populus trichocarpa	135	79.7	3e-13	0.46	0.66	1
18-P03	475	XP_002267417.1	PREDICTED: hypothetical protein	Vitis vinifera	719	140	5e-32	0.77	0.85	3	sp|Q9SJD4	LACS8_ARATH Long chain acyl-CoA synthetase 8	Arabidopsis thaliana	720	135	8e-32	0.74	0.86	3
18-P08	636	XP_002283455.1	PREDICTED: hypothetical protein	Vitis vinifera	129	201	5e-50	0.85	0.94	3	sp|Q9CQT9	CT024_MOUSE Uncharacterized protein C20orf24 homolog	Mus musculus	129	96.7	1e-19	0.39	0.68	3
18-P09	510	ACJ85370.1	unknown	Medicago truncatula	253	134	3e-30	0.61	0.77	3	sp|Q9SRM5	CPR49_ARATH GDSL esterase/lipase CPRD49	Arabidopsisthaliana	256	112	1e-24	0.55	0.75	3
18-P21	465	XP_002330533.1	predicted protein	Populus trichocarpa	725	92.8	1e-17	0.41	0.53	1	sp|P0CB21	Y4645_ARATH Uncharacterized protein At4g26450	Arabidopsis thaliana	708	62	1e-09	0.32	0.48	1
19-A18	404	XP_002282614.1	PREDICTED: hypothetical protein	Vitis vinifera	476	117	4e-25	0.56	0.78	3	sp|Q9LT72	PUS4_ARATH RNA pseudourine synthase 4, mitochondrial	Arabidopsis thaliana	477	77.4	3e-14	0.43	0.68	3
19-B17	865	EEF52936.1	conserved hypothetical protein	Ricinus communis	487	278	5e-73	0.63	0.7	2
19-B24	814	XP_002326335.1	predicted protein	Populus trichocarpa	112	154	9e-36	0.84	0.93	1	sp|Q3ZBN8	TIM14_BOVIN Mitochondrial import inner membranetranslocase subunit TIM14	Bos taurus	116	95.9	3e-19	0.57	0.76	1
19-C04	708	XP_002318248.1	predicted protein	Populus trichocarpa	512	97.8	1e-33	0.61	0.71	1
19-C19	895	EEF46715.1	conserved hypothetical protein	Ricinus communis	621	228	6e-58	0.58	0.66	2
19-C21	554	XP_002278761.1	PREDICTED: hypothetical protein	Vitis vinifera	690	269	1e-70	0.76	0.8	2	sp|Q99PF5	FUBP2_RAT Far upstream element-binding protein 2	Rattus norvegicus	721	88.2	3e-17	0.38	0.53	2
19-C23	608	CAN83669.1	hypothetical protein	Vitis vinifera	446	201	4e-50	0.62	0.8	1
19-D01	726	EEF50824.1	conserved hypothetical protein	Ricinus communis	150	193	1e-47	0.84	0.88	1	sp|O49453	Y4844_ARATH Uncharacterized protein At4g28440	Arabidopsis thaliana	153	159	1e-38	0.68	0.78	1
19-D04	678	XP_002285876.1	PREDICTED: hypothetical protein isoform 1	Vitis vinifera	707	231	3e-59	0.53	0.68	1
19-D05	757	EEF44921.1	conserved hypothetical protein	Ricinus communis	418	220	9e-56	0.53	0.63	2
19-E01	859	AAG50988.1	AC036106_1 hypothetical protein; 8379-15114	Arabidopsis thaliana	863	69.7	3e-10	0.75	0.82	3
19-E12	554	XP_002314001.1	predicted protein	Populus trichocarpa	141	124	3e-27	0.77	0.85	2	sp|Q54UU1	TPPC4_DICDI Trafficking protein particle complex subunit4	Dictyostelium discoideum	135	69.7	1e-11	0.56	0.74	2
19-E19	774	EEF47246.1	conserved hypothetical protein	Ricinus communis	364	348	2e-94	0.76	0.85	1
19-E21	707	XP_002285170.1	PREDICTED: hypothetical protein	Vitis vinifera	615	298	3e-79	0.69	0.75	2	sp|Q17QV2	MON1A_BOVIN Vacuolar fusion protein MON1 homolog A	Bostaurus	555	55.5	3e-07	0.25	0.41	2
19-E23	758	AAM62630.1	unknown	Arabidopsis thaliana	281	208	5e-52	0.85	0.9	3	sp|Q28CH8	YIPF6_XENTR Protein YIPF6	Xenopus tropicalis	233	97.4	9e-20	0.41	0.67	3
19-F13	818	ACJ86151.1	unknown	Medicago truncatula	243	417	e-115	0.84	0.94	3	sp|Q08480	KAD2_ORYSJ Adenylate kinase B	Oryza sativa subsp.japonica	243	416	e-116	0.82	0.93	3
19-G01	783	EEF33465.1	conserved hypothetical protein	Ricinus communis	222	164	7e-39	0.7	0.73	1
19-G02	803	XP_002266620.1	PREDICTED: hypothetical protein	Vitis vinifera	443	382	e-104	0.77	0.87	1
19-G08	857	XP_002319248.1	predicted protein	Populus trichocarpa	452	514	e-144	0.89	0.93	1	sp|Q9LX65	VATH_ARATH V-type proton ATPase subunit H	Arabidopsisthaliana	441	489	e-137	0.83	0.92	1
19-G09	798	XP_002277660.1	PREDICTED: hypothetical protein isoform 1	Vitis vinifera	226	207	1e-76	0.73	0.82	2	sp|Q8LBZ4	OTU_ARATH OTU domain-containing protein At3g57810	Arabidopsis thaliana	317	59.3	3e-08	0.3	0.45	2
19-G17	676	XP_002266334.1	PREDICTED: hypothetical protein	Vitis vinifera	587	163	1e-38	0.61	0.67	3	sp|Q8VYC8	RIN2_ARATH E3 ubiquitin protein ligase RIN2	Arabidopsis thaliana	578	137	8e-32	0.54	0.64	3
19-H12	230	NP_886984.1	hypothetical protein BB0435	Bordetella bronchiseptica RB50	509	82.4	1e-14	0.86	0.95	1
19-H18	841	XP_002275011.1	PREDICTED: hypothetical protein	Vitis vinifera	412	416	e-114	0.9	0.96	2	sp|Q5VNM3	RH2_ORYSJ DEAD-box ATP-dependent RNA helicase 2	Oryzasativa subsp. japonica	404	404	e-112	0.86	0.94	2
19-H19	687	XP_002273725.1	PREDICTED: hypothetical protein	Vitis vinifera	413	129	2e-28	0.38	0.51	1	sp|Q6NXA9	UBXN1_DANRE UBX domain-containing protein 1	Daniorerio	294	51.2	6e-06	0.38	0.6	1
19-I16	538	XP_002308057.1	predicted protein	Populus trichocarpa	548	209	7e-53	0.84	0.89	1	sp|Q9LHS0	CAP10_ARATH Putative clathrin assembly protein At5g35200	Arabidopsis thaliana	544	150	5e-36	0.65	0.73	1
19-I22	544	XP_002325473.1	predicted protein	Populus trichocarpa	493	72.4	2e-11	0.46	0.58	-1	sp|Q9M8R7	P2C33_ARATH Probable protein phosphatase 2C 33	Arabidopsis thaliana	492	54.3	5e-07	0.44	0.72	-1
19-J14	406	XP_002277144.1	PREDICTED: hypothetical protein isoform 1	Vitis vinifera	1013	97.4	4e-19	0.59	0.73	1
19-J17	810	EEF33077.1	conserved hypothetical protein	Ricinus communis	157	191	9e-47	0.64	0.79	1
19-J18	713	CAO68086.1	unnamed protein product	Vitis vinifera	964	234	4e-60	0.56	0.71	2	sp|Q9C744	AP3D_ARATH AP-3 complex subunit delta	Arabidopsisthaliana	869	152	2e-36	0.41	0.6	2
19-K04	622	XP_002284567.1	PREDICTED: hypothetical protein	Vitis vinifera	495	244	4e-63	0.85	0.94	1	sp|Q9C6Y3	CCA11_ARATH Cyclin-A1-1	Arabidopsis thalian	460	198	2e-50	0.7	0.83	1
19-K10	731	XP_002308481.1	predicted protein	Populus trichocarpa	907	197	8e-49	0.47	0.63	1
19-K22	793	XP_002277734.1	PREDICTED: hypothetical protein	Vitis vinifera	429	213	6e-79	0.51	0.66	2	sp|Q9LH89	Y3885_ARATH Uncharacterized protein At3g28850	Arabidopsis thaliana	428	182	1e-67	0.49	0.65	2
19-L05	594	XP_002304373.1	predicted protein	Populus trichocarpa	453	106	2e-21	0.59	0.69	2
19-L20	765	XP_002330107.1	predicted protein	Populus trichocarpa	453	452	e-125	0.86	0.94	1	sp|Q9LFW3	COBL4_ARATH COBRA-like protein 4	Arabidopsis thalian	431	443	e-124	0.83	0.9	1
19-L22	683	XP_002284912.1	PREDICTED: hypothetical protein	Vitis vinifera	291	236	1e-60	0.63	0.69	1	sp|Q68FA7	MARH3_XENTR E3 ubiquitin-protein ligase MARCH3	Xenopustropicalis	251	55.5	3e-07	0.42	0.59	1
19-M08	686	XP_002312335.1	predicted protein	Populus trichocarpa	310	363	7e-99	0.88	0.93	2	sp|Q9LSP7	UBC32_ARATH Ubiquitin-conjugating enzyme E2 32	Arabidopsis thaliana	309	335	2e-91	0.83	0.94	2
19-M17	658	EEF51871.1	conserved hypothetical protein	Ricinus communis	264	290	7e-77	0.82	0.93	2
19-M21	565	EEF40820.1	conserved hypothetical protein	Ricinus communis	475	85.1	3e-15	0.54	0.62	2
19-N08	808	XP_002266369.1	PREDICTED: hypothetical protein isoform 2	Vitis vinifera	277	324	5e-87	0.75	0.83	3	sp|Q6ICB0	PPDE2_HUMAN PPPDE peptidase domain-containing protein 2	Homo sapiens	168	148	4e-35	0.5	0.68	3
19-N09	616	XP_002329803.1	predicted protein	Populus trichocarpa	992	183	8e-45	0.67	0.78	3	sp|Q9SGP2	HSL1_ARATH Receptor-like protein kinase HSL1	Arabidopsis thaliana	996	150	6e-36	0.57	0.71	3
19-N11	654	ABK96194.1	unknown	Populus trichocarpa	329	322	1e-86	0.78	0.9	2	sp|Q8H0M1	QORH_SPIOL Quinone-oxidoreductase homolog, chloroplastic	Spinacia oleracea	329	311	3e-84	0.76	0.85	2
19-N23	520	EEF42644.1	conserved hypothetical protein	Ricinus communis	75	108	2e-22	0.83	0.91	1
19-O12	505	EEF31715.1	conserved hypothetical protein	Ricinus communis	1196	139	1e-31	0.57	0.67	1
19-O16	659	XP_002316063.1	predicted protein	Populus trichocarpa	368	229	1e-58	0.64	0.74	3	sp|Q9LNF4	P2C13_ARATH Probable protein phosphatase 2C 13	Arabidopsis thaliana	383	190	6e-48	0.55	0.68	3
19-P13	719	EEF49388.1	conserved hypothetical protein	Ricinus communis	81	60.5	5e-09	0.82	0.94	1
20-A03	688	XP_002270110.1	PREDICTED: hypothetical protein	Vitis vinifera	289	276	9e-73	0.68	0.88	3	sp|Q94B74	NUDT2_ARATH Nudix hydrolase 2	Arabidopsis thalian	278	237	5e-62	0.63	0.81	3
20-A07	685	ABK95898.1	unknown	Populus trichocarpa	324	181	5e-44	0.68	0.81	2
20-A15	670	XP_002267219.1	PREDICTED: hypothetical protein	Vitis vinifera	153	197	9e-49	0.62	0.79	3	sp|Q93VR4	ML423_ARATH MLP-like protein 423	Arabidopsis thalian	155	185	2e-46	0.61	0.73	3
20-B02	659	XP_002316909.1	predicted protein	Populus trichocarpa	580	159	1e-37	0.75	0.82	1	sp|Q2UUI3	CCR4_ASPOR Glucose-repressible alcohol dehydrogenasetranscriptional effector	Aspergillus oryzae	746	74.7	5e-13	0.4	0.57	1
20-C04	754	XP_002300870.1	predicted protein	Populus trichocarpa	391	393	e-108	0.8	0.88	2	sp|Q9SHJ8	HIBC8_ARATH 3-hydroxyisobutyryl-CoA hydrolase-likeprotein 5	Arabidopsis thaliana	387	353	7e-97	0.72	0.83	2
20-C15	834	XP_002306945.1	predicted protein	Populus trichocarpa	292	377	e-103	0.8	0.89	1	sp|Q7ZUC7	PGES2_DANRE Prostaglandin E synthase 2	Danio reri	377	173	1e-42	0.4	0.53	1
20-C16	777	XP_002324093.1	predicted protein	Populus trichocarpa	117	181	5e-44	0.76	0.82	3	sp|Q8LCS8	MUB2_ARATH Membrane-anchored ubiquitin-fold protein 2	Arabidopsis thaliana	124	149	3e-35	0.63	0.74	3
20-C20	553	XP_002318935.1	predicted protein	Populus trichocarpa	181	352	8e-96	1	1	1	sp|O48920	ARF_VIGUN ADP-ribosylation factor	Vigna unguiculat	181	351	2e-96	0.99	1	1
20-C23	792	XP_002328639.1	predicted protein	Populus trichocarpa	408	236	2e-60	0.62	0.7	2	sp|Q9SIK7	PSNB_ARATH Presenilin-like protein At2g29900	Arabidopsis thaliana	397	214	7e-55	0.6	0.7	2
20-D04	554	CAN65659.1	hypothetical protein	Vitis vinifera	1742	250	4e-65	0.66	0.79	3	sp|O81635	ATK4_ARATH Kinesin-4	Arabidopsis thaliana	987	102	1e-21	0.44	0.57	3
20-D05	638	XP_002265426.1	PREDICTED: hypothetical protein	Vitis vinifera	1068	267	6e-70	0.62	0.72	3
20-D09	779	XP_002274871.1	PREDICTED: hypothetical protein	Vitis vinifera	324	453	e-126	0.89	0.95	1	sp|P48496	TPIC_SPIOL Triosephosphate isomerase, chloroplastic	Spinacia oleracea	322	448	e-125	0.87	0.95	1
20-D16	832	XP_002327273.1	predicted protein	Populus trichocarpa	204	324	7e-87	0.78	0.79	2	sp|O23515	RL151_ARATH 60S ribosomal protein L15-1	Arabidopsisthaliana	204	310	1e-83	0.75	0.78	2
20-D18	734	XP_002276510.1	PREDICTED: hypothetical protein	Vitis vinifera	169	173	2e-41	0.53	0.64	3	sp|Q94AR4	CID2_ARATH Polyadenylate-binding protein-interactingprotein 2	Arabidopsis thaliana	143	79.3	2e-14	0.34	0.49	3
20-D21	464	XP_002263441.1	PREDICTED: hypothetical protein	Vitis vinifera	70	143	7e-33	0.95	0.97	3	sp|Q9VWH8	KISH_DROME Protein kish	Drosophila melanogaste	74	88.2	2e-17	0.55	0.74	3
20-D22	774	XP_002262674.1	PREDICTED: hypothetical protein	Vitis vinifera	800	405	e-111	0.81	0.85	2
20-E08	696	EEF33962.1	hypothetical protein RCOM_0615680	Ricinus communis	313	298	3e-79	0.62	0.7	2
20-E12	798	XP_002317476.1	predicted protein	Populus trichocarpa	376	321	6e-86	0.64	0.74	3	sp|P0A9J6	RBSK_ECOLI Ribokinase	Escherichia coli (strain K12	309	102	4e-21	0.33	0.5	3
20-E22	671	XP_002326280.1	predicted protein	Populus trichocarpa	221	265	3e-69	0.76	0.91	1	sp|Q54FL3	MED20_DICDI Putative mediator of RNA polymerase IItranscription subunit 20	Dictyostelium discoideu	195	60.5	1e-08	0.32	0.5	1
20-F01	810	EEF30304.1	conserved hypothetical protein	Ricinus communis	373	363	8e-99	0.75	0.86	1
20-F02	712	XP_002312440.1	predicted protein	Populus trichocarpa	443	334	5e-90	0.74	0.85	1	sp|Q9M9Q6	SCP50_ARATH Serine carboxypeptidase-like 50	Arabidopsis thaliana	444	301	2e-81	0.67	0.8	1
20-F03	206	YP_002254869.1	protein of unknown function duf879, bacterial	Ralstoniasolanacearum MolK2	616	82.4	1e-14	0.59	0.73	3
20-F23	527	CAN69799.1	hypothetical protein	Vitis vinifera	234	236	7e-61	0.78	0.92	1	sp|Q84WW5	VAP13_ARATH Vesicle-associated protein 1-3	Arabidopsisthaliana	239	223	5e-58	0.76	0.89	1
20-G07	891	ABK95671.1	unknown	Populus trichocarpa	384	425	e-117	0.81	0.9	1	sp|Q9SU94	ANM11_ARATH Protein arginine N-methyltransferase 1.1	Arabidopsis thaliana	390	387	e-107	0.74	0.85	1
20-G08	750	XP_002310032.1	predicted protein	Populus trichocarpa	377	217	1e-54	0.52	0.64	3	sp|Q8C5N5	PDD2L_MOUSE Programmed cell death protein 2-like	Musmusculus	364	53.9	1e-06	0.37	0.51	3
20-G13	739	ABK93580.1	unknown	Populus trichocarpa	120	191	6e-47	0.82	0.83	1	sp|P40590	RL34_PEA 60S ribosomal protein L34	Pisum sativu	120	186	1e-46	0.79	0.81	1
20-H05	893	ZP_01452508.1	Predicted acyltransferase	Mariprofundus ferrooxydans PV-1	357	143	2e-32	0.47	0.62	2
20-H06	525	XP_002463699.1	hypothetical protein SORBIDRAFT_01g004480	Sorghum bicolor	107	196	6e-49	0.9	0.97	3	sp|Q3ZCG2	BR44L_BOVIN Brain protein 44-like protein	Bos tauru	109	108	2e-23	0.57	0.67	3
20-H08	887	XP_002311506.1	predicted protein	Populus trichocarpa	103	80.5	2e-13	0.43	0.6	1	sp|Q8L9H6	CLE17_ARATH CLAVATA3/ESR (CLE)-related protein 17	Arabidopsis thaliana	99	52.8	3e-06	0.57	0.57	1
20-H19	581	XP_002299948.1	predicted protein	Populus trichocarpa	389	230	5e-59	0.99	1	1	sp|O22342	ADT1_GOSHI ADP,ATP carrier protein 1, mitochondrial	Gossypium hirsutum	386	223	9e-58	0.95	0.97	1
20-I07	816	EEF33353.1	conserved hypothetical protein	Ricinus communis	429	281	7e-74	0.79	0.86	2
20-I10	808	XP_002285073.1	PREDICTED: hypothetical protein	Vitis vinifera	326	385	e-105	0.78	0.84	1	sp|P83291	NCB5R_ARATH NADH-cytochrome b5 reductase-like protein	Arabidopsis thaliana	328	363	e-100	0.73	0.82	1
20-I13	870	XP_002313763.1	predicted protein	Populus trichocarpa	329	231	5e-59	0.49	0.56	1	sp|Q9FH57	GATA5_ARATH GATA transcription factor 5	Arabidopsisthaliana	339	130	1e-29	0.33	0.42	1
20-I16	779	EEF29911.1	conserved hypothetical protein	Ricinus communis	1183	323	1e-86	0.64	0.78	2	sp|Q7Z392	CD041_HUMAN UPF0636 protein C4orf41	Homo sapien	1133	74.7	6e-13	0.25	0.44	2
20-I19	556	XP_002276633.1	PREDICTED: hypothetical protein	Vitis vinifera	1821	304	3e-81	0.8	0.87	3	sp|Q6NS46	RRP5_MOUSE Protein RRP5 homolog	Mus musculus	1862	159	1e-38	0.48	0.66	3
20-J14	628	XP_002271738.1	PREDICTED: R2R3 MYB60 transcription factor	Vitis vinifera	321	305	2e-81	0.72	0.75	2	sp|P81392	MYB06_ANTMA Myb-related protein 306	Antirrhinum maju	316	248	3e-65	0.58	0.66	2
20-J17	609	EEF49805.1	hypothetical protein RCOM_1431030	Ricinus communis	1097	94	8e-18	0.26	0.51	2
20-K13	583	XP_002302529.1	predicted protein	Populus trichocarpa	598	288	3e-76	0.7	0.82	3
20-K24	519	XP_002274155.1	PREDICTED: hypothetical protein	Vitis vinifera	144	138	2e-31	0.74	0.83	1
20-L07	688	XP_002272691.1	PREDICTED: hypothetical protein isoform 2	Vitis vinifera	182	171	4e-41	0.76	0.79	2	sp|Q8BL97	SRSF7_MOUSE Serine/arginine-rich splicing factor 7	Musmusculus	267	96.7	1e-19	0.41	0.57	2
20-L10	803	XP_002327679.1	predicted protein	Populus trichocarpa	161	277	9e-73	0.86	0.88	3	sp|Q9FWT2	UBC16_ARATH Probable ubiquitin-conjugating enzyme E2 16	Arabidopsis thaliana	161	267	7e-71	0.82	0.87	3
20-L19	911	XP_002323959.1	predicted protein	Populus trichocarpa	355	345	3e-93	0.67	0.77	3	sp|Q94B59	PP372_ARATH Pentatricopeptide repeat-containing proteinAt5g09450, mitochondrial	Arabidopsis thalian	409	312	2e-84	0.57	0.77	3
20-L20	682	XP_002329078.1	predicted protein	Populus trichocarpa	282	220	1e-55	0.79	0.83	2	sp|Q9LDA7	P2C39_ARATH Probable protein phosphatase 2C 39	Arabidopsis thaliana	289	212	2e-54	0.76	0.82	2
20-L22	690	XP_002316699.1	predicted protein	Populus trichocarpa	354	161	4e-38	0.54	0.63	1	sp|Q9FKA5	Y5957_ARATH Uncharacterized protein At5g39570	Arabidopsis thaliana	381	68.6	4e-11	0.38	0.59	1
20-L23	482	XP_002320127.1	predicted protein	Populus trichocarpa	61	71.2	3e-11	0.72	0.9	1
20-M05	898	XP_002270455.1	PREDICTED: hypothetical protein	Vitis vinifera	380	532	e-149	0.91	0.96	1	sp|Q39011	KSG7_ARATH Shaggy-related protein kinase eta	Arabidopsis thaliana	380	520	e-147	0.9	0.96	1
20-M07	614	XP_002326303.1	predicted protein	Populus trichocarpa	198	261	2e-68	0.78	0.87	3	sp|P17407	21KD_DAUCA 21 kDa protein	Daucus carota	193	139	2e-32	0.38	0.68	3
20-M12	878	XP_002301150.1	predicted protein	Populus trichocarpa	348	420	e-115	0.8	0.92	2	sp|O22193	PUB4_ARATH U-box domain-containing protein 4	Arabidopsisthaliana	811	189	2e-47	0.45	0.62	2
20-M18	943	XP_002277315.1	PREDICTED: hypothetical protein	Vitis vinifera	334	470	e-130	0.9	0.96	3	sp|Q3SWX0	NIPA2_BOVIN Magnesium transporter NIPA2	Bos tauru	360	259	2e-68	0.53	0.69	3
20-M21	841	XP_002264247.1	PREDICTED: hypothetical protein	Vitis vinifera	596	400	e-110	0.82	0.91	1	sp|Q6AZT7	NPHP3_XENLA Nephrocystin-3	Xenopus laevis	1300	59.7	2e-08	0.23	0.44	1
20-M22	311	XP_002277628.1	PREDICTED: hypothetical protein	Vitis vinifera	214	63.2	8e-09	0.66	0.72	1	sp|Q38896	GRP2B_ARATH Glycine-rich protein 2b	Arabidopsisthaliana	201	60.8	2e-09	0.64	0.72	1
20-M24	614	EEF34506.1	conserved hypothetical protein	Ricinus communis	426	387	e-106	0.85	0.93	1	sp|Q9Y2M2	CC032_HUMAN Uncharacterized protein C3orf32	Homosapiens	353	81.3	4e-15	0.31	0.46	1
20-N02	487	XP_002316563.1	predicted protein	Populus trichocarpa	155	84.3	4e-15	0.41	0.52	2
20-N04	835	XP_002277146.1	PREDICTED: similar to plastid serine hydroxymethyltransferase	Vitis vinifera	528	175	7e-54	0.84	0.9	2	sp|P34899	GLYM_PEA Serine hydroxymethyltransferase, mitochondrial	Pisum sativum	518	140	5e-42	0.66	0.78	2
20-N14	849	XP_002312584.1	predicted protein	Populus trichocarpa	194	100	2e-19	0.36	0.5	2
20-N17	822	XP_002300160.1	predicted protein	Populus trichocarpa	185	192	4e-47	0.56	0.7	2
20-N23	864	XP_002303898.1	predicted protein	Populus trichocarpa	680	375	e-102	0.64	0.71	2	sp|Q10M00	C3H22_ORYSJ Zinc finger CCCH domain-containing protein 22	Oryza sativa subsp. japonica	688	250	8e-66	0.52	0.64	2
20-P20	112	XP_002453516.1	hypothetical protein SORBIDRAFT_04g007170	Sorghum bicolor	422	69.3	1e-10	0.86	0.94	2	sp|Q9C5U3	PRS8A_ARATH 26S protease regulatory subunit 8 homolog A	Arabidopsis thaliana	419	66.2	6e-11	0.86	0.91	2
21-A05	702	XP_002282804.1	PREDICTED: hypothetical protein	Vitis vinifera	378	205	3e-51	0.7	0.84	2
21-A08	899	XP_002316775.1	predicted protein	Populus trichocarpa	361	337	1e-90	0.59	0.71	1	sp|Q8VYE2	TIM50_ARATH Mitochondrial import inner membranetranslocase subunit TIM50	Arabidopsis thalian	376	296	2e-79	0.55	0.65	1
21-A22	428	ABK93186.1	unknown	Populus trichocarpa	279	60.5	6e-08	0.59	0.74	2	sp|Q9M4U5	HDT2_MAIZE Histone deacetylase HDT2	Zea mays	303	58.2	2e-08	0.66	0.86	2
21-B06	751	XP_002315819.1	predicted protein	Populus trichocarpa	661	127	9e-52	0.65	0.78	2	sp|Q84MA9	Y1063_ARATH Inactive leucine-rich repeat receptor-likeserine/threonine-protein kinase At1g60630	Arabidopsisthaliana	652	119	2e-47	0.62	0.74	2
21-B08	410	XP_002285835.1	PREDICTED: hypothetical protein	Vitis vinifera	97	140	5e-32	1	1	3	sp|Q94DM8	UFM1_ORYSJ Ubiquitin-fold modifier 1	Oryza sativasubsp. japonica	102	137	2e-32	1	1	3
21-C01	866	EEF33853.1	conserved hypothetical protein	Ricinus communis	361	156	2e-36	0.74	0.86	1
21-C22	716	EEF42564.1	protein with unknown function	Ricinus communis	734	246	2e-63	0.79	0.88	1	sp|Q94F87	CMT2_ARATH DNA (cytosine-5)-methyltransferase CMT2	Arabidopsis thaliana	1295	215	3e-55	0.71	0.84	1
21-D04	584	XP_002298685.1	predicted protein	Populus trichocarpa	805	230	5e-59	0.82	0.92	2	sp|Q9SVN5	SYM_ARATH Probable methionyl-tRNA synthetase	Arabidopsisthaliana	797	221	3e-57	0.8	0.89	2
21-D22	424	CAN64864.1	hypothetical protein	Vitis vinifera	728	59.3	6e-11	0.74	0.85	1
21-E19	818	XP_002285620.1	PREDICTED: hypothetical protein	Vitis vinifera	354	373	e-101	0.89	0.93	2	sp|Q9T0H9	UF162_ARATH UPF0016 protein 2, chloroplastic	Arabidopsis thaliana	359	363	e-100	0.86	0.95	2
21-F05	463	XP_002278488.1	PREDICTED: similar to ATPAP18/PAP18 (purple acid phosphatase 18);acid phosphatase/ protein serine/threonine phosphatase	Vitis vinifera	455	140	4e-32	0.77	0.85	3	sp|Q9LJU7	PPA18_ARATH Purple acid phosphatase 18	Arabidopsisthaliana	437	132	7e-31	0.69	0.85	3
21-F10	854	XP_002328017.1	predicted protein	Populus trichocarpa	240	218	4e-55	0.63	0.74	1
21-F13	866	EEF41344.1	hypothetical protein RCOM_1393220	Ricinus communis	254	244	6e-63	0.69	0.77	3	sp|Q9SWG3	FAR1_ARATH Protein FAR-RED IMPAIRED RESPONSE 1	Arabidopsis thaliana	827	237	9e-62	0.7	0.78	3
21-F17	892	EEF43758.1	conserved hypothetical protein	Ricinus communis	607	495	e-138	0.78	0.88	1
21-F21	446	XP_002267800.1	PREDICTED: hypothetical protein	Vitis vinifera	51	81.3	3e-14	0.97	0.97	2	sp|P48011	RPAB4_SCHPO DNA-directed RNA polymerases I, II, and IIIsubunit RPABC4	Schizosaccharomyces pombe	63	59.3	9e-09	0.6	0.86	2
21-G01	848	XP_002332077.1	predicted protein	Populus trichocarpa	198	255	3e-66	0.67	0.76	3	sp|Q9AKH1	FER2_RICRI 2Fe-2S ferredoxin	Rickettsia rickettsi	112	149	3e-35	0.66	0.82	3
21-G07	465	XP_002329605.1	predicted protein	Populus trichocarpa	536	151	2e-35	0.88	0.92	1	sp|Q8W4H1	GAT26_ARATH GATA transcription factor 26	Arabidopsisthaliana	510	129	6e-30	0.76	0.85	1
21-G11	388	XP_002280712.1	PREDICTED: similar to Os12g0541500	Vitis vinifera	1135	74.3	3e-13	0.55	0.64	1
21-G14	779	XP_002277212.1	PREDICTED: hypothetical protein	Vitis vinifera	444	361	4e-98	0.78	0.86	3	sp|Q03563	SPK1_CAEEL Serine/threonine-protein kinase spk-1	Caenorhabditis elegans	1003	179	2e-44	0.55	0.73	3
21-G16	458	XP_002327630.1	predicted protein	Populus trichocarpa	329	102	2e-20	0.73	0.9	2
21-G17	664	XP_002313384.1	predicted protein	Populus trichocarpa	243	301	3e-80	0.81	0.88	1
21-G20	893	XP_002266968.1	PREDICTED: hypothetical protein	Vitis vinifera	504	565	e-159	0.92	0.95	2	sp|Q00218	AROG_ARATH Phospho-2-dehydro-3-deoxyheptonate aldolase 2,chloroplastic	Arabidopsis thaliana	507	518	e-146	0.84	0.9	2
21-H14	732	XP_002277744.1	PREDICTED: hypothetical protein	Vitis vinifera	322	262	2e-68	0.68	0.85	3	sp|Q8LDU4	RCCR_ARATH Red chlorophyll catabolite reductase,chloroplastic	Arabidopsis thaliana	319	225	3e-58	0.56	0.81	3
21-I15	529	XP_002307493.1	predicted protein	Populus trichocarpa	69	134	5e-30	0.84	0.89	3	sp|P48504	QCR6_SOLTU Cytochrome b-c1 complex subunit 6	Solanumtuberosum	69	112	1e-24	0.68	0.79	3
21-I16	782	XP_002326284.1	predicted protein	Populus trichocarpa	358	366	1e-99	0.69	0.84	3	sp|Q8H166	ALEU_ARATH Thiol protease aleurain	Arabidopsisthaliana	358	343	6e-94	0.65	0.8	3
21-I18	836	XP_002322760.1	predicted protein	Populus trichocarpa	535	296	2e-78	0.54	0.66	2
21-I20	690	XP_002305221.1	predicted protein	Populus trichocarpa	192	99	3e-19	0.56	0.68	1
21-I23	826	XP_002266696.1	PREDICTED: hypothetical protein	Vitis vinifera	303	120	1e-25	0.47	0.52	1
21-J10	567	XP_002305742.1	predicted protein	Populus trichocarpa	735	60.1	1e-07	0.89	1	1
21-J15	797	XP_002319734.1	predicted protein	Populus trichocarpa	323	293	2e-77	0.55	0.6	2	sp|P81392	MYB06_ANTMA Myb-related protein 306	Antirrhinum maju	316	242	2e-63	0.6	0.68	2
21-J17	623	XP_002265818.1	PREDICTED: hypothetical protein	Vitis vinifera	356	340	4e-92	0.78	0.89	1	sp|Q56W64	ASPG3_ARATH Probable isoaspartyl peptidase/L-asparaginase3	Arabidopsis thaliana	359	303	7e-82	0.71	0.84	1
21-J20	876	XP_002264383.1	PREDICTED: hypothetical protein	Vitis vinifera	388	367	e-100	0.67	0.72	1	sp|Q9XJ35	CLPR1_ARATH ATP-dependent Clp protease proteolyticsubunit-related protein 1, chloroplastic	Arabidopsisthaliana	387	337	5e-92	0.61	0.7	1
21-K09	888	CAN83381.1	hypothetical protein	Vitis vinifera	422	55.1	2e-08	0.78	0.87	1
21-K15	931	XP_002316890.1	predicted protein	Populus trichocarpa	485	339	2e-91	0.62	0.75	2	sp|Q9LUH3	LAL5_ARATH MATE efflux family protein LAL5	Arabidopsisthaliana	469	294	5e-79	0.57	0.71	2
21-L08	808	XP_002305231.1	predicted protein	Populus trichocarpa	736	424	e-117	0.78	0.84	1	sp|Q43644	NDUS1_SOLTU NADH-ubiquinone oxidoreductase 75 kDa subunit,mitochondrial	Solanum tuberosum	738	394	e-109	0.72	0.8	1
21-L16	892	XP_002272701.1	PREDICTED: hypothetical protein	Vitis vinifera	408	506	e-142	0.92	0.97	2	sp|P54260	GCST_SOLTU Aminomethyltransferase, mitochondrial	Solanum tuberosum	406	501	e-141	0.89	0.96	2
21-M12	853	XP_002279237.1	PREDICTED: hypothetical protein	Vitis vinifera	187	142	3e-32	0.66	0.78	1	sp|Q9ZQI8	NLTL2_ARATH Non-specific lipid-transfer protein-likeprotein At2g13820	Arabidopsis thaliana	169	73.9	1e-12	0.37	0.56	1
21-M19	904	XP_002327227.1	predicted protein	Populus trichocarpa	649	241	5e-62	0.73	0.82	1
21-O02	832	EEF35093.1	conserved hypothetical protein	Ricinus communis	616	482	e-134	0.9	0.95	1	sp|Q68CZ6	HAUS3_HUMAN HAUS augmin-like complex subunit 3	Homosapiens	603	66.2	3e-10	0.22	0.48	1
21-O07	574	XP_002307980.1	predicted protein	Populus trichocarpa	284	254	4e-66	0.7	0.84	1	sp|Q6NLB1	FB118_ARATH F-box protein At2g26850	Arabidopsisthaliana	371	233	6e-61	0.62	0.83	1
21-O20	829	XP_002313181.1	predicted protein	Populus trichocarpa	575	298	5e-79	0.56	0.68	2	sp|A1CX14	XYNC_NEOFI Probable endo-1,4-beta-xylanase C	Neosartorya fischeri (strain ATCC 1020 / DSM 3700 /FGSC A1164 / NRRL 181)	314	53.9	1e-06	0.46	0.73	2
21-P10	850	XP_002283144.1	PREDICTED: hypothetical protein	Vitis vinifera	135	164	1e-38	0.67	0.79	2	sp|P20397	NUCL_XENLA Nucleolin	Xenopus laevis	651	70.5	1e-11	0.39	0.6	2
21-P13	890	XP_002263473.1	PREDICTED: hypothetical protein	Vitis vinifera	289	301	4e-80	0.74	0.87	2	sp|Q8S8F8	GEM_ARATH GLABRA2 expression modulator	Arabidopsisthaliana	299	298	4e-80	0.7	0.8	2
21-P18	666	EEF40990.1	protein with unknown function	Ricinus communis	175	209	2e-52	0.78	0.81	1	sp|Q8VI33	TAF9_MOUSE Transcription initiation factor TFIID subunit9	Mus musculus	264	96.7	1e-19	0.5	0.68	1
21-P21	854	XP_002319402.1	predicted protein	Populus trichocarpa	156	194	1e-47	0.65	0.73	1
22-A05	853	CAO68517.1	unnamed protein product	Vitis vinifera	613	303	1e-80	0.62	0.77	3	sp|B2RS91	RRN3_MOUSE RNA polymerase I-specific transcriptioninitiation factor RRN3	Mus musculus	656	52.8	3e-06	0.23	0.44	3
22-A07	871	XP_002301682.1	predicted protein	Populus trichocarpa	441	363	2e-98	0.69	0.8	1	sp|Q766C3	NEP1_NEPGR Aspartic proteinase nepenthesin-1	Nepenthesgracilis	437	82	5e-15	0.29	0.42	1
22-A10	846	EEF35186.1	conserved hypothetical protein	Ricinus communis	645	476	e-132	0.89	0.94	2	sp|Q8TC07	TBC15_HUMAN TBC1 domain family member 15	Homo sapien	691	225	3e-58	0.49	0.67	2
22-A23	806	XP_002264898.1	PREDICTED: hypothetical protein	Vitis vinifera	178	191	9e-47	0.56	0.67	2	sp|Q6YYB0	Y8359_ORYSJ Uncharacterized protein Os08g0359500	Oryzasativa subsp. japonica	213	159	2e-38	0.61	0.75	2
22-B01	874	BAF01964.1	hypothetical protein	Arabidopsis thaliana	167	267	5e-77	0.92	0.94	-3	sp|Q8TGM7	ART2_YEAST Putative uncharacterized protein ART2	Saccharomyces cerevisiae	61	86.7	2e-16	0.76	0.78	-3
22-B08	412	XP_002285566.1	PREDICTED: hypothetical protein	Vitis vinifera	83	60.5	5e-08	0.63	0.77	2
22-B11	813	XP_002314707.1	predicted protein	Populus trichocarpa	393	210	1e-52	0.83	0.93	2	sp|Q5R9K4	TMM49_PONAB Transmembrane protein 49	Pongo abeli	406	90.5	1e-17	0.4	0.6	2
22-B13	770	XP_002330895.1	predicted protein	Populus trichocarpa	478	484	e-135	0.9	0.95	3	sp|P83372	CISY_FRAAN Citrate synthase, mitochondrial	Fragariaananassa	469	480	e-135	0.88	0.95	3
22-B20	868	XP_002317160.1	predicted protein	Populus trichocarpa	568	328	e-131	0.82	0.91	2	sp|Q41141	PFPB_RICCO Pyrophosphate--fructose 6-phosphate1-phosphotransferase subunit beta	Ricinus communi	552	315	e-128	0.86	0.93	2
22-B24	502	XP_002320796.1	predicted protein	Populus trichocarpa	367	148	2e-34	0.52	0.59	-1
22-C14	833	EEF51070.1	conserved hypothetical protein	Ricinus communis	730	341	4e-92	0.73	0.78	3	sp|Q5BJQ2	FA63A_RAT Protein FAM63A	Rattus norvegicus	482	119	3e-26	0.38	0.57	3
22-C20	479	XP_002264331.1	PREDICTED: hypothetical protein	Vitis vinifera	330	137	4e-31	0.88	0.96	3	sp|Q9UNW9	NOVA2_HUMAN RNA-binding protein Nova-2	Homo sapien	492	68.2	2e-11	0.43	0.72	3
22-C21	830	XP_002326416.1	predicted protein	Populus trichocarpa	1463	431	e-119	0.73	0.85	1	sp|Q7PC84	AB39G_ARATH ABC transporter G family member 39	Arabidopsis thaliana	1454	382	e-105	0.65	0.82	1
22-D02	723	EEF39987.1	conserved hypothetical protein	Ricinus communis	329	172	2e-41	0.78	0.85	2
22-D03	523	YP_002869886.1	hypothetical protein PFLU0191	Pseudomonas fluorescens SBW25	175	289	9e-77	0.86	0.9	2	sp|P25338	YGB0_YEAST Uncharacterized endoplasmic reticulum membraneprotein YGL010W	Saccharomyces cerevisiae	174	71.6	3e-12	0.34	0.5	2
22-D13	726	XP_002278988.1	PREDICTED: hypothetical protein	Vitis vinifera	100	75.5	5e-12	0.51	0.57	1
22-D19	842	EEF43251.1	conserved hypothetical protein	Ricinus communis	396	320	1e-85	0.61	0.74	1	sp|Q84WQ5	CBSX5_ARATH CBS domain-containing protein CBSX5	Arabidopsis thaliana	391	219	1e-56	0.41	0.62	1
22-D20	604	XP_002272562.1	PREDICTED: hypothetical protein	Vitis vinifera	361	115	2e-24	0.65	0.72	3
22-E05	704	XP_002265041.1	PREDICTED: hypothetical protein	Vitis vinifera	160	257	8e-67	0.84	0.87	2	sp|Q6PC91	BT3L4_DANRE Transcription factor BTF3 homolog 4	Daniorerio	158	150	8e-36	0.5	0.68	2
22-E08	567	EEF41696.1	conserved hypothetical protein	Ricinus communis	293	223	1e-56	0.72	0.86	2
22-E18	809	XP_002325016.1	predicted protein	Populus trichocarpa	512	242	3e-62	0.62	0.74	2	sp|Q53HY2	NINJA_TOBAC Ninja-family protein mc410	Nicotianatabacum	510	172	3e-42	0.47	0.6	2
22-E20	877	XP_002320713.1	predicted protein	Populus trichocarpa	243	361	6e-98	0.8	0.84	1	sp|O22151	GOS12_ARATH Golgi SNARE 12 protein	Arabidopsisthaliana	239	350	6e-96	0.79	0.84	1
22-E22	848	XP_002274579.1	PREDICTED: hypothetical protein	Vitis vinifera	840	474	e-132	0.8	0.89	3	sp|Q9FY75	POT7_ARATH Potassium transporter 7	Arabidopsis thalian	858	463	e-130	0.79	0.87	3
22-E24	721	XP_002321208.1	predicted protein	Populus trichocarpa	379	221	4e-56	0.81	0.88	2	sp|Q9LUA9	COL10_ARATH Zinc finger protein CONSTANS-LIKE 10	Arabidopsis thaliana	373	208	3e-53	0.77	0.86	2
22-F05	744	XP_002275939.1	PREDICTED: hypothetical protein	Vitis vinifera	680	312	2e-83	0.67	0.79	2	sp|P13540	MYH7_MESAU Myosin-7	Mesocricetus auratus	1934	60.1	2e-08	0.28	0.49	2
22-F09	289	XP_002278167.1	PREDICTED: hypothetical protein	Vitis vinifera	527	63.5	7e-09	0.96	1	1	sp|Q9CAJ0	P2C16_ARATH Protein phosphatase 2C 16	Arabidopsisthaliana	511	60.5	3e-09	0.79	1	1
22-F10	800	EEF45558.1	conserved hypothetical protein	Ricinus communis	244	209	7e-54	0.81	0.9	1	sp|Q84WN3	SWT17_ARATH Bidirectional sugar transporter SWEET17	Arabidopsis thaliana	241	155	3e-39	0.62	0.76	1
22-F20	802	XP_002270290.1	PREDICTED: similar to putative GTPase activating protein	Vitis vinifera	376	175	5e-42	0.55	0.68	1	sp|Q8L7A4	AGD11_ARATH Probable ADP-ribosylation factorGTPase-activating protein AGD11	Arabidopsis thalian	385	170	9e-42	0.56	0.65	1
22-F24	653	ACN41155.1	unknown	Picea sitchensis	97	63.2	2e-08	0.35	0.57	2
22-G05	748	XP_002270049.1	PREDICTED: hypothetical protein	Vitis vinifera	901	227	7e-58	0.87	0.94	3	sp|P27934	AMY3E_ORYSJ Alpha-amylase isozyme 3E	Oryza sativasubsp. japonica	437	129	3e-29	0.53	0.66	3
22-G09	641	ABK96333.1	unknown	Populus trichocarpa x Populus deltoides	172	303	1e-80	0.83	0.88	2	sp|Q8W171	CYP1_SOYBN Peptidyl-prolyl cis-trans isomerase 1	Glycine max	172	297	3e-80	0.83	0.88	2
22-G14	333	XP_002311531.1	predicted protein	Populus trichocarpa	619	106	7e-22	0.71	0.73	1
22-H03	793	CAO14359.1	unnamed protein product	Vitis vinifera	260	86.3	1e-15	0.46	0.58	3
22-H16	591	XP_001366344.1	PREDICTED: similar to histone protein Hist2h3c1	Monodelphisdomestica	194	228	2e-58	0.84	0.85	1	sp|P68428	H32_WHEAT Histone H3.2	Triticum aestivum	136	228	2e-59	0.87	0.87	1
22-H19	883	XP_002323994.1	predicted protein	Populus trichocarpa	403	187	9e-46	0.67	0.8	2
22-H21	632	EEF37964.1	conserved hypothetical protein	Ricinus communis	667	103	1e-20	0.85	0.96	2	sp|Q6LA42	APRR5_ARATH Two-component response regulator-like APRR5	Arabidopsis thaliana	558	101	3e-21	0.87	0.94	2
22-I05	366	XP_002270877.1	PREDICTED: hypothetical protein	Vitis vinifera	158	144	4e-33	0.92	0.97	3
22-I10	417	XP_002321053.1	predicted protein	Populus trichocarpa	446	126	6e-28	0.6	0.69	3
22-I21	304	ABE80139.1	hypothetical protein MtrDRAFT_AC139526g8v2	Medicago truncatula	335	64.3	4e-09	0.78	0.89	2
22-J16	868	EEF33761.1	conserved hypothetical protein	Ricinus communis	790	431	e-119	0.71	0.87	3
22-J20	671	XP_002285804.1	PREDICTED: hypothetical protein	Vitis vinifera	450	139	2e-31	0.57	0.67	3
22-K12	372	XP_002325082.1	predicted protein	Populus trichocarpa	484	163	6e-39	0.62	0.76	1	sp|Q64398	DGKH_MESAU Diacylglycerol kinase eta	Mesocricetusauratus	1154	58.9	9e-09	0.39	0.54	1
22-K22	780	XP_002285369.1	PREDICTED: hypothetical protein	Vitis vinifera	437	191	5e-47	0.73	0.85	1
22-L05	498	XP_002320212.1	predicted protein	Populus trichocarpa	125	182	1e-44	0.76	0.92	3	sp|Q9ZPX9	KIC_ARATH Calcium-binding protein KIC	Arabidopsisthaliana	135	173	4e-43	0.72	0.84	3
22-L21	561	XP_002331822.1	predicted protein	Populus trichocarpa	276	259	1e-67	0.75	0.87	3
22-M03	855	XP_002309315.1	predicted protein	Populus trichocarpa	279	335	3e-90	0.76	0.84	3	sp|O22300	LET12_SOLLC Homeobox protein knotted-1-like LET12	Solanum lycopersicum	426	319	2e-86	0.74	0.81	3
22-M04	544	XP_002313261.1	predicted protein	Populus trichocarpa	360	132	2e-29	0.61	0.7	3
22-M08	870	XP_002276625.1	PREDICTED: hypothetical protein	Vitis vinifera	413	376	e-102	0.65	0.7	3	sp|P23922	HBP1A_WHEAT Transcription factor HBP-1a	Triticumaestivum	349	140	2e-32	0.35	0.44	3
22-O03	560	EEE69144.1	hypothetical protein OsJ_28268	Oryza sativa Japonica Group	1256	58.2	4e-07	0.28	0.44	-1
22-P05	905	XP_002323226.1	predicted protein	Populus trichocarpa	494	348	4e-94	0.9	0.93	1
22-P24	574	XP_002328804.1	predicted protein	Populus trichocarpa	287	174	3e-42	0.75	0.78	1
23-A02	751	ABK28760.1	unknown	Arabidopsis thaliana	399	366	1e-99	0.77	0.85	1	sp|Q8RXL8	Y1689_ARATH Uncharacterized membrane protein At1g06890	Arabidopsis thaliana	357	85.5	3e-16	0.29	0.48	1
23-A05	815	YP_002871751.1	hypothetical protein PFLU2135	Pseudomonas fluorescens SBW25	217	308	5e-82	0.92	0.96	3	sp|C3K6R3	Y2135_PSEFS UPF0502 protein PFLU_2135	Pseudomonasfluorescens (strain SBW25)	217	308	4e-83	0.92	0.96	3
23-A10	792	XP_002269291.1	PREDICTED: hypothetical protein	Vitis vinifera	317	335	2e-90	0.7	0.8	3	sp|Q9ZPE4	FBW2_ARATH F-box protein FBW2	Arabidopsis thalian	317	200	8e-51	0.47	0.62	3
23-B02	869	XP_002279027.1	PREDICTED: hypothetical protein	Vitis vinifera	325	313	1e-83	0.63	0.73	1
23-B12	785	XP_002280085.1	PREDICTED: hypothetical protein	Vitis vinifera	120	194	1e-47	0.77	0.85	3	sp|Q3ZCG8	TMM93_BOVIN Transmembrane protein 93	Bos tauru	110	87.4	1e-16	0.43	0.59	3
23-B14	862	CAN76937.1	hypothetical protein	Vitis vinifera	327	357	8e-97	0.62	0.78	2	sp|P51108	DFRA_MAIZE Dihydroflavonol-4-reductase	Zea mays	357	244	4e-64	0.48	0.66	2
23-B15	459	ABK93321.1	unknown	Populus trichocarpa	68	67.8	3e-10	0.82	0.9	3
23-B21	808	XP_002310568.1	predicted protein	Populus trichocarpa	451	231	6e-59	0.48	0.58	2
23-C02	777	XP_002303016.1	predicted protein	Populus trichocarpa	486	379	e-103	0.87	0.95	3
23-C04	573	XP_002310854.1	predicted protein	Populus trichocarpa	122	192	1e-47	0.83	0.93	2	sp|Q94G00	PIN1_MALDO Peptidyl-prolyl cis-trans isomerase Pin1	Malus domestica	121	191	3e-48	0.82	0.93	2
23-C06	795	XP_002317061.1	predicted protein	Populus trichocarpa	210	109	3e-22	0.5	0.58	2
23-C08	615	XP_002266369.1	PREDICTED: hypothetical protein isoform 2	Vitis vinifera	277	285	3e-75	0.84	0.87	3	sp|Q6ICB0	PPDE2_HUMAN PPPDE peptidase domain-containing protein 2	Homo sapiens	168	132	2e-30	0.52	0.66	3
23-D20	589	XP_002322933.1	predicted protein	Populus trichocarpa	229	231	2e-59	0.65	0.7	1
23-D22	611	XP_002281259.1	PREDICTED: hypothetical protein	Vitis vinifera	265	117	7e-25	0.66	0.71	2
23-E03	576	XP_002271328.1	PREDICTED: hypothetical protein	Vitis vinifera	245	235	2e-60	0.85	0.94	3	sp|Q9ZVE0	ORN_ARATH Oligoribonuclease	Arabidopsis thalian	222	202	1e-51	0.72	0.89	3
23-E07	604	XP_002270003.1	PREDICTED: hypothetical protein	Vitis vinifera	313	280	8e-74	0.86	0.93	3	sp|Q9M9P0	EXP13_ARATH Expansin-A13	Arabidopsis thalian	266	273	8e-73	0.85	0.93	3
23-E17	513	XP_002275178.1	PREDICTED: hypothetical protein	Vitis vinifera	264	219	8e-56	0.75	0.84	1	sp|Q8LPQ7	VAP43_ARATH Vesicle-associated protein 4-3	Arabidopsisthaliana	287	199	6e-51	0.62	0.71	1
23-F02	573	XP_002273090.1	PREDICTED: hypothetical protein	Vitis vinifera	348	172	2e-41	0.81	0.85	2	sp|Q9H1N7	S35B3_HUMAN Adenosine 3'-phospho 5'-phosphosulfatetransporter 2	Homo sapiens	401	59.3	2e-08	0.35	0.54	2
23-F06	661	XP_002284627.1	PREDICTED: hypothetical protein	Vitis vinifera	435	320	7e-86	0.75	0.89	1	sp|Q5R501	OST48_PONAB Dolichyl-diphosphooligosaccharide--proteinglycosyltransferase 48 kDa subunit	Pongo abeli	439	175	2e-43	0.47	0.67	1
23-F09	403	XP_002298768.1	predicted protein	Populus trichocarpa	56	124	2e-27	0.94	0.94	3	sp|Q680P8	RS29_ARATH 40S ribosomal protein S29	Arabidopsisthaliana	56	117	2e-26	0.89	0.91	3
23-F13	665	XP_002322301.1	predicted protein	Populus trichocarpa	724	156	1e-36	0.78	0.87	2	sp|Q9FIT8	AGD1_ARATH ADP-ribosylation factor GTPase-activatingprotein AGD1	Arabidopsis thaliana	828	150	5e-36	0.76	0.88	2
23-F15	574	XP_002276622.1	PREDICTED: hypothetical protein	Vitis vinifera	134	156	9e-37	0.81	0.91	3	sp|A6Q0K5	CP12_CHLRE Calvin cycle protein CP12	Chlamydomonasreinhardtii	80	63.2	1e-09	0.39	0.64	3
23-F23	829	XP_002262921.1	PREDICTED: hypothetical protein	Vitis vinifera	386	420	e-115	0.83	0.92	1	sp|Q93Y35	PSMD6_ARATH Probable 26S proteasome non-ATPase regulatorysubunit 6	Arabidopsis thaliana	387	401	e-111	0.81	0.9	1
23-G02	831	XP_002267514.1	PREDICTED: hypothetical protein	Vitis vinifera	1006	421	e-116	0.78	0.85	2	sp|Q8R5L3	VPS39_MOUSE Vam6/Vps39-like protein	Mus musculu	886	68.9	4e-11	0.41	0.62	2
23-G07	611	CAN60012.1	hypothetical protein	Vitis vinifera	306	70.9	7e-11	0.41	0.56	2
23-G16	867	CAO67400.1	unnamed protein product	Vitis vinifera	516	357	8e-97	0.66	0.79	2	sp|Q14103	HNRPD_HUMAN Heterogeneous nuclear ribonucleoprotein D0	Homo sapiens	355	102	3e-21	0.29	0.5	2
23-G18	688	XP_002298675.1	predicted protein	Populus trichocarpa	461	283	1e-74	0.64	0.78	3	sp|Q94BZ5	HSFA5_ARATH Heat stress transcription factor A-5	Arabidopsis thaliana	466	245	2e-64	0.53	0.73	3
23-G20	436	EEF45197.1	conserved hypothetical protein	Ricinus communis	76	95.9	1e-18	0.87	1	1
23-G24	857	EEE53976.1	hypothetical protein OsJ_00596	Oryza sativa Japonica Group	1066	87.4	2e-15	0.26	0.4	-2	sp|P0C2F6	RNHX1_ARATH Putative ribonuclease H protein At1g65750	Arabidopsis thaliana	620	61.6	7e-09	0.28	0.45	-2
23-H09	457	XP_002328772.1	predicted protein	Populus trichocarpa	237	84.3	4e-15	0.7	0.84	3
23-H16	775	BAD05323.1	hypothetical protein	Oryza sativa Japonica Group	128	114	1e-23	0.66	0.8	3
23-H18	516	XP_002309149.1	predicted protein	Populus trichocarpa	876	178	2e-43	0.91	0.93	2	sp|O80452	AMPD_ARATH AMP deaminase	Arabidopsis thaliana	839	174	2e-43	0.91	0.94	2
23-H20	532	XP_002277407.1	PREDICTED: hypothetical protein	Vitis vinifera	829	171	2e-41	0.73	0.8	3	sp|Q10442	YDE9_SCHPO Uncharacterized mitochondrial carrierC12B10.09	Schizosaccharomyces pombe	345	53.1	1e-06	0.45	0.64	3
23-H22	754	XP_002298527.1	predicted protein	Populus trichocarpa	471	276	1e-72	0.59	0.71	1	sp|Q9ZQ94	COGT3_ARATH Cytokinin-O-glucosyltransferase 3	Arabidopsis thaliana	495	122	3e-27	0.32	0.52	1
23-H23	841	XP_002303801.1	predicted protein	Populus trichocarpa	486	381	e-104	0.84	0.9	3	sp|Q9C7G0	MA658_ARATH 65-kDa microtubule-associated protein 8	Arabidopsis thaliana	562	337	6e-92	0.71	0.83	3
23-J02	564	XP_002318085.1	predicted protein	Populus trichocarpa	329	316	6e-85	0.86	0.92	1
23-J15	469	CAO42013.1	unnamed protein product	Vitis vinifera	151	137	1e-46	1	1	3	sp|Q96499	RL44_GOSHI 60S ribosomal protein L44	Gossypiumhirsutum	105	137	1e-47	1	1	3
23-K13	843	XP_002311324.1	predicted protein	Populus trichocarpa	333	123	2e-26	0.35	0.46	3
23-K16	883	XP_002271465.1	PREDICTED: hypothetical protein	Vitis vinifera	428	373	e-101	0.65	0.73	1
23-L02	806	XP_002307494.1	predicted protein	Populus trichocarpa	420	448	e-124	0.79	0.91	3
23-L10	712	CAO42369.1	unnamed protein product	Vitis vinifera	243	178	5e-43	0.77	0.9	2
23-L18	490	XP_002266435.1	PREDICTED: hypothetical protein	Vitis vinifera	56	100	6e-20	0.76	0.91	2
23-L20	608	ABK92669.1	unknown	Populus trichocarpa	122	186	2e-45	0.72	0.88	1	sp|Q43636	TRXH_RICCO Thioredoxin H-type	Ricinus communis	118	183	6e-46	0.76	0.89	1
23-M06	842	XP_002275926.1	PREDICTED: hypothetical protein	Vitis vinifera	379	361	4e-98	0.63	0.72	2	sp|O82199	C3H20_ARATH Zinc finger CCCH domain-containing protein 20	Arabidopsis thaliana	359	298	2e-80	0.55	0.66	2
23-M08	416	CAO69162.1	unnamed protein product	Vitis vinifera	89	65.1	2e-09	0.53	0.66	1
23-M10	241	XP_002320973.1	predicted protein	Populus trichocarpa	328	97.1	5e-19	0.81	0.9	2
23-M18	478	XP_002267686.1	PREDICTED: hypothetical protein	Vitis vinifera	195	54.7	3e-06	0.52	0.59	3
23-M24	869	XP_002303852.1	predicted protein	Populus trichocarpa	319	286	2e-75	0.59	0.7	2	sp|Q9SAH7	WRK40_ARATH Probable WRKY transcription factor 40	Arabidopsis thaliana	302	217	1e-55	0.51	0.66	2
23-N01	639	XP_002306758.1	predicted protein	Populus trichocarpa	581	267	5e-70	0.73	0.86	2	sp|Q5SP67	WDR26_DANRE WD repeat-containing protein 26	Daniorerio	576	75.1	3e-13	0.31	0.53	2
23-N13	480	XP_002281176.1	PREDICTED: hypothetical protein	Vitis vinifera	90	89.7	8e-17	0.86	0.9	2
23-O12	788	XP_002264226.1	PREDICTED: hypothetical protein	Vitis vinifera	712	222	3e-56	0.42	0.55	1	sp|Q9LXE5	DRM1_ARATH DNA (cytosine-5)-methyltransferase DRM1	Arabidopsis thaliana	624	97.1	1e-19	0.37	0.49	1
23-O17	821	XP_002264958.1	PREDICTED: hypothetical protein	Vitis vinifera	330	407	e-112	0.75	0.84	3	sp|Q54PW9	EI24_DICDI Protein EI24 homolog	Dictyosteliumdiscoideum	307	111	7e-24	0.27	0.44	3
23-P04	642	YP_001630743.1	hypothetical protein Bpet2134	Bordetella petrii DSM 12804	575	347	5e-94	0.89	0.92	1	sp|P02942	MCP1_ECOLI Methyl-accepting chemotaxis protein I	Escherichia coli (strain K12)	551	280	7e-75	0.72	0.81	1
23-P11	721	XP_002324416.1	predicted protein	Populus trichocarpa	199	270	3e-81	0.8	0.86	1	sp|P29687	RAB5_TOBAC Ras-related protein Rab5	Nicotiana tabacu	200	236	3e-63	0.68	0.8	1
23-P14	598	XP_002265598.1	PREDICTED: hypothetical protein	Vitis vinifera	173	194	3e-48	0.75	0.78	1	sp|Q5R723	PPIE_PONAB Peptidyl-prolyl cis-trans isomerase E	Pongoabelii	301	102	2e-21	0.5	0.63	1
23-P20	559	AAG52446.1	AC010852_3 unknown protein; 23656-22633	Arabidopsis thaliana	200	247	4e-64	0.81	0.93	3
23-P21	664	XP_002272896.1	PREDICTED: hypothetical protein	Vitis vinifera	360	225	3e-57	0.54	0.59	1	sp|O64647	TCP9_ARATH Transcription factor TCP9	Arabidopsisthaliana	356	204	4e-52	0.63	0.71	1
31-A05	646	XP_001773593.1	predicted protein	Physcomitrella patens subsp. patens	155	140	6e-65	0.88	0.9	2	sp|Q9FY65	RS153_ARATH 40S ribosomal protein S15-3	Arabidopsisthaliana	150	142	7e-66	0.85	0.91	2
31-A14	627	EEF35581.1	conserved hypothetical protein	Ricinus communis	163	258	4e-67	0.75	0.82	3	sp|Q641M3	TMM18_DANRE Transmembrane protein 18	Danio reri	152	86.7	1e-16	0.46	0.6	3
31-B03	831	XP_002268145.1	PREDICTED: hypothetical protein	Vitis vinifera	119	115	6e-41	0.73	0.9	2	sp|Q6Z8K4	MUB3_ORYSJ Membrane-anchored ubiquitin-fold protein 3	Oryza sativa subsp. japonica	119	85.5	5e-27	0.56	0.74	2
31-B13	626	XP_002278867.1	PREDICTED: hypothetical protein	Vitis vinifera	216	139	2e-31	0.83	0.89	3	sp|O48556	IPYR_MAIZE Soluble inorganic pyrophosphatase	Zea may	214	107	8e-23	0.73	0.77	3
31-B14	589	XP_002300957.1	predicted protein	Populus trichocarpa	421	220	7e-56	0.77	0.87	1	sp|Q6NPR7	PMTO_ARATH Probable methyltransferase PMT24	Arabidopsisthaliana	770	202	1e-51	0.7	0.84	1
31-B15	740	XP_002330107.1	predicted protein	Populus trichocarpa	453	275	4e-72	0.8	0.85	1	sp|Q9LFW3	COBL4_ARATH COBRA-like protein 4	Arabidopsis thalian	431	265	3e-70	0.75	0.82	1
31-B22	301	XP_002270232.1	PREDICTED: hypothetical protein	Vitis vinifera	531	116	6e-25	0.66	0.77	1	sp|Q9SQT8	DHQSD_ARATH Bifunctional 3-dehydroquinatedehydratase/shikimate dehydrogenase, chloroplastic	Arabidopsis thaliana	603	86.3	6e-17	0.5	0.76	1
31-C08	827	XP_002277439.1	PREDICTED: similar to Stigma-specific protein Stig1	Vitis vinifera	193	167	1e-39	0.55	0.7	-3
31-C15	711	ABK96350.1	unknown	Populus trichocarpa x Populus deltoides	225	193	1e-47	0.66	0.77	1	sp|Q8LPN7	RNG1L_ARATH E3 ubiquitin-protein ligase RING1-like	Arabidopsis thaliana	328	73.6	1e-12	0.48	0.73	1
31-C20	764	XP_002272471.1	PREDICTED: hypothetical protein	Vitis vinifera	614	63.2	3e-08	0.35	0.43	2
31-D02	707	EEF49951.1	conserved hypothetical protein	Ricinus communis	173	265	3e-69	0.77	0.88	1	sp|Q8LGG8	USPAL_ARATH Universal stress protein A-like protein	Arabidopsis thaliana	175	68.9	3e-11	0.31	0.52	1
31-D16	771	XP_002326087.1	predicted protein	Populus trichocarpa	289	415	e-114	0.88	0.95	3	sp|Q8LDW9	XTH9_ARATH Xyloglucan endotransglucosylase/hydrolaseprotein 9	Arabidopsis thaliana	290	353	9e-97	0.78	0.9	3
31-D19	671	XP_002313616.1	predicted protein	Populus trichocarpa	215	362	2e-98	0.95	0.98	3
31-E14	843	XP_002267996.1	PREDICTED: hypothetical protein	Vitis vinifera	254	362	2e-98	0.72	0.81	3
31-E23	775	XP_002270877.1	PREDICTED: hypothetical protein	Vitis vinifera	158	236	2e-60	0.72	0.85	2
31-F04	767	EEC83100.1	hypothetical protein OsI_28249	Oryza sativa Indica Group	1300	60.5	5e-14	0.38	0.53	-2
31-F05	815	CAO39437.1	unnamed protein product	Vitis vinifera	285	148	7e-34	0.57	0.59	1	sp|O49404	BEH3_ARATH BES1/BZR1 homolog protein 3	Arabidopsisthaliana	284	125	3e-28	0.49	0.57	1
31-F09	919	XP_002277633.1	PREDICTED: hypothetical protein	Vitis vinifera	356	344	6e-93	0.64	0.79	2	sp|Q9LMJ3	GDL1_ARATH GDSL esterase/lipase At1g06990	Arabidopsisthaliana	360	323	1e-87	0.57	0.76	2
31-F13	357	NP_566336.1	unknown protein	Arabidopsis thaliana	170	89.7	9e-17	0.74	0.9	3	sp|Q9M015	Y5161_ARATH Uncharacterized protein At5g01610	Arabidopsis thaliana	170	85.9	7e-17	0.7	0.89	3
31-F23	670	XP_002315747.1	predicted protein	Populus trichocarpa	462	283	9e-75	0.7	0.82	3	sp|Q60967	PAPS1_MOUSE Bifunctional 3'-phosphoadenosine5'-phosphosulfate synthase 1	Mus musculus	624	134	7e-31	0.47	0.65	3
31-G10	727	XP_002285049.1	PREDICTED: hypothetical protein	Vitis vinifera	544	389	e-106	0.77	0.88	1	sp|E0CSI1	MTBC1_VITVI Probable bifunctionalmethylthioribulose-1-phosphatedehydratase/enolase-phosphatase E1 1	Vitis vinifer	507	389	e-107	0.77	0.88	1
31-G19	816	ABK96044.1	unknown	Populus trichocarpa	365	332	2e-89	0.73	0.84	1	sp|P29518	BT1_MAIZE Protein brittle-1, chloroplastic/amyloplastic	Zea mays	436	112	4e-24	0.37	0.6	1
31-G22	876	XP_002305015.1	predicted protein	Populus trichocarpa	179	234	1e-59	0.68	0.77	2
31-H03	758	XP_002273670.1	PREDICTED: hypothetical protein	Vitis vinifera	420	416	e-115	0.79	0.92	3
31-H05	325	XP_002284540.1	PREDICTED: hypothetical protein	Vitis vinifera	266	55.8	1e-06	0.8	0.9	3	sp|Q9FZ32	FB60_ARATH F-box protein At1g55000	Arabidopsisthaliana	221	52.8	7e-07	0.75	0.93	3
31-H09	781	ABK93213.1	unknown	Populus trichocarpa	178	357	5e-97	0.95	0.98	2	sp|Q9ATF5	RL18A_CASSA 60S ribosomal protein L18a	Castanea sativ	178	345	2e-94	0.91	0.97	2
31-H13	213	EEF30237.1	conserved hypothetical protein	Ricinus communis	436	101	2e-20	0.84	0.98	2	sp|O49434	AAH_ARATH Allantoate deiminase, chloroplastic	Arabidopsis thaliana	525	94	3e-19	0.84	0.92	2
31-H24	745	EEF47548.1	conserved hypothetical protein	Ricinus communis	200	211	6e-53	0.62	0.71	2	sp|P0AAT8	YBEB_SHIFL Uncharacterized protein ybeB	Shigellaflexneri	105	58.5	4e-08	0.42	0.58	2
31-I02	334	XP_002298012.1	predicted protein	Populus trichocarpa	187	86.3	9e-16	0.95	1	1	sp|Q9CAK8	ISPF_ARATH 2-C-methyl-D-erythritol 2,4-cyclodiphosphatesynthase, chloroplastic	Arabidopsis thaliana	231	83.2	5e-16	0.88	1	1
31-I04	324	ACJ84627.1	unknown	Medicago truncatula	258	54.3	4e-06	0.83	0.9	2
31-I11	860	XP_002274480.1	PREDICTED: hypothetical protein	Vitis vinifera	386	404	e-111	0.74	0.81	2	sp|Q9M2C9	SKIP4_ARATH F-box/kelch-repeat protein SKIP4	Arabidopsis thaliana	358	274	7e-73	0.53	0.67	2
31-I15	847	CAO65565.1	unnamed protein product	Vitis vinifera	381	389	e-106	0.83	0.93	1	sp|Q9T0K7	HIBC6_ARATH 3-hydroxyisobutyryl-CoA hydrolase-likeprotein 3	Arabidopsis thaliana	381	382	e-105	0.81	0.91	1
31-I21	831	XP_002313946.1	predicted protein	Populus trichocarpa	431	343	9e-93	0.72	0.82	1
31-J04	532	XP_002272460.1	PREDICTED: hypothetical protein	Vitis vinifera	532	117	6e-25	0.9	0.95	3	sp|Q80ZX8	SPAG1_MOUSE Sperm-associated antigen 1	Mus musculu	901	51.6	3e-06	0.37	0.6	3
31-J20	401	ACF85685.1	unknown	Zea mays	201	79	2e-13	0.79	0.85	3
31-J22	811	XP_002276992.1	PREDICTED: hypothetical protein	Vitis vinifera	1382	141	8e-32	0.39	0.56	3	sp|P0C5E2	Y1839_ARATH Probable serine/threonine-protein kinaseAt1g18390	Arabidopsis thaliana	654	62.8	3e-09	0.24	0.42	3
31-J23	815	XP_002266593.1	PREDICTED: hypothetical protein	Vitis vinifera	348	269	2e-70	0.58	0.65	1	sp|Q9FLQ4	ODO2A_ARATH Dihydrolipoyllysine-residuesuccinyltransferase component of 2-oxoglutaratedehydrogenase complex 1, mitochondrial	Arabidopsisthaliana	464	208	3e-53	0.49	0.6	1
31-K10	819	EEF47437.1	conserved hypothetical protein	Ricinus communis	269	166	3e-39	0.37	0.46	1
31-K11	889	YP_002871501.1	hypothetical protein PFLU1866	Pseudomonas fluorescens SBW25	219	397	e-109	0.85	0.92	-3
31-K13	827	XP_002263396.1	PREDICTED: hypothetical protein	Vitis vinifera	362	145	6e-33	0.66	0.71	1	sp|P0C8L4	Y4648_ARATH Uncharacterized protein At4g26485	Arabidopsis thaliana	209	87.4	1e-16	0.43	0.58	1
31-K14	820	XP_002275068.1	PREDICTED: hypothetical protein	Vitis vinifera	403	191	9e-47	0.46	0.52	-1
31-L13	872	XP_002285174.1	PREDICTED: hypothetical protein	Vitis vinifera	340	405	e-111	0.73	0.84	3	sp|Q762D5	S35D2_MOUSEUDP-N-acetylglucosamine/UDP-glucose/GDP-mannosetransporter	Mus musculus	326	102	3e-21	0.29	0.52	3
31-L19	793	XP_002264651.1	PREDICTED: hypothetical protein	Vitis vinifera	359	297	9e-79	0.82	0.88	2	sp|A8X2R2	ZFPL1_CAEBR Zinc finger protein-like 1 homolog	Caenorhabditis briggsae	319	108	5e-23	0.38	0.5	2
31-L22	346	EEF27144.1	conserved hypothetical protein	Ricinus communis	211	137	5e-31	0.97	0.98	1	sp|Q94AH6	CUL1_ARATH Cullin-1	Arabidopsis thaliana	738	134	1e-31	0.95	0.97	1
31-M04	838	XP_002271998.1	PREDICTED: hypothetical protein	Vitis vinifera	142	112	6e-23	0.45	0.52	1
31-M05	392	YP_002869964.1	hypothetical protein PFLU0281	Pseudomonas fluorescens SBW25	146	92.4	1e-17	0.91	0.97	-1
31-M19	401	YP_002873533.1	hypothetical protein PFLU3982	Pseudomonas fluorescens SBW25	400	191	2e-47	0.79	0.87	3
31-M20	924	XP_002323825.1	predicted protein	Populus trichocarpa	696	598	e-169	0.94	0.97	2	sp|Q9C952	CPSF3_ARATH Cleavage and polyadenylation specificity factorsubunit 3-I	Arabidopsis thaliana	693	585	e-166	0.91	0.97	2
31-M24	672	XP_002323893.1	predicted protein	Populus trichocarpa	143	265	3e-69	0.88	0.95	3	sp|Q9FNP8	RS193_ARATH 40S ribosomal protein S19-3	Arabidopsisthaliana	143	259	8e-69	0.86	0.93	3
31-N06	854	XP_002266768.1	PREDICTED: hypothetical protein	Vitis vinifera	525	355	3e-96	0.7	0.79	2	sp|Q05047	C72A1_CATRO Secologanin synthase	Catharanthus roseu	524	86.3	2e-16	0.26	0.44	2
31-N09	900	XP_002306361.1	predicted protein	Populus trichocarpa	385	455	e-126	0.81	0.86	2	sp|B9H5L9	LIAS_POPTR Lipoyl synthase, mitochondrial	Populustrichocarpa	385	455	e-127	0.81	0.86	2
31-N14	681	EEF43608.1	conserved hypothetical protein	Ricinus communis	286	197	7e-49	0.71	0.81	1
31-N16	788	EEF34090.1	conserved hypothetical protein	Ricinus communis	421	360	1e-97	0.75	0.87	3
31-O02	653	XP_002329890.1	predicted protein	Populus trichocarpa	666	197	6e-49	0.77	0.87	1	sp|Q9C5X3	KEULE_ARATH SNARE-interacting protein KEULE	Arabidopsis thaliana	666	187	7e-47	0.74	0.85	1
31-O04	814	XP_002265636.1	PREDICTED: hypothetical protein	Vitis vinifera	433	139	4e-41	0.87	0.9	3	sp|Q5VTL8	PR38B_HUMAN Pre-mRNA-splicing factor 38B	Homo sapien	546	65.5	7e-15	0.49	0.55	3
31-O05	677	ABA40451.1	unknown	Solanum tuberosum	122	208	3e-52	0.91	0.96	2
31-O14	682	XP_002285259.1	PREDICTED: hypothetical protein	Vitis vinifera	664	164	7e-39	0.76	0.89	2
31-P06	865	XP_002282312.1	PREDICTED: hypothetical protein	Vitis vinifera	587	280	1e-73	0.73	0.77	1	sp|Q93ZY2	ROGF1_ARATH Rop guanine nucleotide exchange factor 1	Arabidopsis thaliana	548	269	2e-71	0.71	0.79	1
31-P12	893	EEF49836.1	conserved hypothetical protein	Ricinus communis	473	351	6e-95	0.58	0.72	1	sp|Q9FZ33	AXR4_ARATH Protein AUXIN RESPONSE 4	Arabidopsis thalian	473	316	1e-85	0.52	0.7	1
31-P13	608	XP_002322222.1	predicted protein	Populus trichocarpa	245	193	8e-48	0.67	0.74	1	sp|Q5ZM74	RN141_CHICK RING finger protein 141	Gallus gallu	230	52.4	2e-06	0.44	0.62	1
31-P19	872	XP_002302076.1	predicted protein	Populus trichocarpa	292	363	1e-98	0.63	0.78	3	sp|Q8GXH3	OSB2_ARATH Protein OSB2, chloroplastic	Arabidopsisthaliana	371	122	2e-27	0.35	0.56	3
32-A01	831	ABK95981.1	unknown	Populus trichocarpa	243	393	e-107	0.77	0.88	2	sp|Q8BVA2	TM222_MOUSE Transmembrane protein 222	Mus musculu	208	120	1e-26	0.35	0.56	2
32-A10	696	XP_002274890.1	PREDICTED: similar to protein kinase family protein	Vitis vinifera	697	222	2e-56	0.52	0.66	2
32-B04	924	CAN73127.1	hypothetical protein	Vitis vinifera	157	141	8e-32	0.73	0.85	1	sp|P24068	OCS1_MAIZE Ocs element-binding factor 1	Zea may	151	81.6	7e-15	0.48	0.68	1
32-B11	830	XP_002299945.1	predicted protein	Populus trichocarpa	584	201	5e-50	0.76	0.83	2	sp|Q9SZ30	HIS5_ARATH Imidazole glycerol phosphate synthase hisHF,chloroplastic	Arabidopsis thaliana	592	196	2e-49	0.76	0.84	2
32-B13	287	EEF45857.1	conserved hypothetical protein	Ricinus communis	873	139	7e-32	0.72	0.84	1
32-C15	840	ABK96292.1	unknown	Populus trichocarpa x Populus deltoides	190	182	5e-50	0.58	0.75	1	sp|Q9SEU6	TRXM4_ARATH Thioredoxin M4, chloroplastic	Arabidopsisthaliana	193	167	1e-45	0.54	0.7	1
32-C17	865	XP_002315172.1	predicted protein	Populus trichocarpa	287	375	e-102	0.79	0.85	3	sp|O04202	EIF3F_ARATH Eukaryotic translation initiation factor 3subunit F	Arabidopsis thaliana	293	343	1e-93	0.71	0.8	3
32-D07	465	XP_002301457.1	predicted protein	Populus trichocarpa	357	290	4e-77	0.83	0.88	2	sp|P07858	CATB_HUMAN Cathepsin B	Homo sapiens	339	158	1e-38	0.47	0.6	2
32-D16	663	XP_002271221.1	PREDICTED: hypothetical protein	Vitis vinifera	461	99	4e-34	0.72	0.88	2
32-D22	790	XP_002308200.1	predicted protein	Populus trichocarpa	335	272	3e-71	0.58	0.68	1	sp|Q9LYX1	LRK82_ARATH L-type lectin-domain containing receptorkinase VIII.2	Arabidopsis thaliana	711	103	1e-21	0.31	0.51	1
32-D23	655	XP_002308845.1	predicted protein	Populus trichocarpa	268	310	7e-83	0.94	0.98	1	sp|Q9FF66	UBC22_ARATH Ubiquitin-conjugating enzyme E2 22	Arabidopsis thaliana	251	293	5e-79	0.89	0.94	1
32-D24	674	ACJ86005.1	unknown	Medicago truncatula	235	166	1e-39	0.61	0.67	-3	sp|O80366	ARR9_ARATH Two-component response regulator ARR9	Arabidopsis thaliana	234	110	6e-24	0.65	0.91	-3
32-E06	843	XP_002283191.1	PREDICTED: hypothetical protein	Vitis vinifera	1065	480	e-134	0.85	0.91	3	sp|Q9ZW07	PUM1_ARATH Pumilio homolog 1	Arabidopsis thalian	968	408	e-113	0.74	0.83	3
32-E10	790	XP_002283636.1	PREDICTED: similar to Glutaminyl-tRNA synthetase	Vitis vinifera	791	297	7e-79	0.74	0.88	3	sp|P52780	SYQ_LUPLU Glutaminyl-tRNA synthetase	Lupinus luteu	794	260	8e-69	0.67	0.82	3
32-E21	911	CAO15455.1	unnamed protein product	Vitis vinifera	633	141	8e-32	0.39	0.51	2
32-E24	669	XP_002268048.1	PREDICTED: hypothetical protein	Vitis vinifera	1034	128	4e-28	0.94	0.97	1
32-F08	230	YP_002007683.1	conserved hypothetical protein; DUF879	Cupriavidus taiwanensis	612	117	5e-25	0.69	0.84	-2
32-F11	847	XP_002265899.1	PREDICTED: hypothetical protein	Vitis vinifera	571	354	7e-96	0.62	0.77	2
32-F17	738	EEF49304.1	conserved hypothetical protein	Ricinus communis	305	207	8e-52	0.47	0.59	3
32-G08	879	XP_002263263.1	PREDICTED: hypothetical protein	Vitis vinifera	429	264	8e-79	0.84	0.95	3	sp|Q96US8	G3P_SCLSC Glyceraldehyde-3-phosphate dehydrogenase	Sclerotinia sclerotiorum	338	160	2e-47	0.65	0.8	3
32-G09	536	CAO47764.1	unnamed protein product	Vitis vinifera	181	185	1e-45	0.51	0.63	3
32-G19	556	BAF36333.1	hypothetical protein	Ipomoea trifida	1092	87.8	5e-16	0.51	0.64	2	sp|P93043	VPS41_ARATH Vacuolar protein sorting-associated protein 41homolog	Arabidopsis thaliana	980	70.9	5e-12	0.43	0.55	2
32-G23	862	XP_002271180.1	PREDICTED: hypothetical protein	Vitis vinifera	867	284	7e-75	0.62	0.72	2	sp|Q9SIC9	PP178_ARATH Pentatricopeptide repeat-containing proteinAt2g31400, chloroplastic	Arabidopsis thalian	918	197	6e-50	0.46	0.58	2
32-H09	724	XP_002322078.1	predicted protein	Populus trichocarpa	378	276	1e-72	0.62	0.84	3
32-H12	529	NP_190869.3	unknown protein	Arabidopsis thaliana	297	125	2e-27	0.46	0.6	2	sp|Q8L9J9	CAES_ARATH Probable carbohydrate esterase At4g34215	Arabidopsis thaliana	260	95.1	2e-19	0.5	0.6	2
32-H16	821	XP_002303864.1	predicted protein	Populus trichocarpa	220	282	2e-74	0.79	0.85	3
32-H21	332	XP_002277447.1	PREDICTED: hypothetical protein	Vitis vinifera	68	62.4	1e-08	0.5	0.71	1
32-I09	453	XP_002302420.1	predicted protein	Populus trichocarpa	391	73.2	8e-12	0.68	0.8	2
32-I13	872	XP_002310695.1	predicted protein	Populus trichocarpa	578	454	e-126	0.77	0.85	2	sp|Q9FKY5	MLO10_ARATH MLO-like protein 10	Arabidopsis thalian	569	430	e-120	0.71	0.82	2
32-I22	796	XP_002278708.1	PREDICTED: hypothetical protein	Vitis vinifera	405	387	e-106	0.78	0.86	1	sp|Q9MAP8	B3GT6_ARATH Probable beta-1,3-galactosyltransferase 6	Arabidopsis thaliana	399	312	2e-84	0.65	0.76	1
32-J03	886	XP_002283779.1	PREDICTED: hypothetical protein	Vitis vinifera	307	409	e-112	0.76	0.89	3	sp|O82631	CAPZA_ARATH F-actin-capping protein subunit alpha	Arabidopsis thaliana	308	379	e-104	0.7	0.84	3
32-J05	821	ABK95837.1	unknown	Populus trichocarpa	452	263	e-105	0.81	0.9	1	sp|Q9M069	E137_ARATH Glucan endo-1,3-beta-glucosidase 7	Arabidopsis thaliana	504	243	e-104	0.76	0.85	1
32-J16	868	EEF36728.1	conserved hypothetical protein	Ricinus communis	448	304	6e-81	0.7	0.8	3
32-J23	330	CAO15916.1	unnamed protein product	Vitis vinifera	134	58.5	2e-07	0.65	0.8	2
32-K07	847	XP_002285479.1	PREDICTED: hypothetical protein	Vitis vinifera	447	400	e-110	0.75	0.79	2	sp|O60176	YG41_SCHPO Uncharacterized RNA-binding protein C23E6.01c	Schizosaccharomyces pombe	473	181	6e-45	0.4	0.56	2
32-K13	836	CAO44298.1	unnamed protein product	Vitis vinifera	1128	467	e-130	0.84	0.9	2
32-K24	689	XP_002311638.1	predicted protein	Populus trichocarpa	471	220	1e-55	0.53	0.6	1
32-L02	895	XP_002305615.1	predicted protein	Populus trichocarpa	302	494	e-138	0.86	0.9	2	sp|Q9VXT2	DJC25_DROME DnaJ homolog subfamily C member 25 homolog	Drosophila melanogaster	333	181	6e-45	0.33	0.55	2
32-L09	876	XP_002269940.1	PREDICTED: hypothetical protein, partial	Vitis vinifera	608	73.2	3e-11	0.28	0.49	2	sp|Q9LNG5	PPP7L_ARATH Serine/threonine-protein phosphatase 7 longform homolog	Arabidopsis thaliana	1340	60.5	2e-08	0.27	0.43	2
32-L10	331	XP_002280115.1	PREDICTED: hypothetical protein	Vitis vinifera	364	93.2	8e-18	0.73	0.82	1
32-M05	838	XP_002279043.1	PREDICTED: hypothetical protein isoform 2	Vitis vinifera	425	286	2e-75	0.81	0.95	-2
32-M24	857	XP_002269215.1	PREDICTED: hypothetical protein	Vitis vinifera	843	421	e-116	0.83	0.89	2	sp|O80452	AMPD_ARATH AMP deaminase	Arabidopsis thaliana	839	374	e-103	0.74	0.82	2
32-N01	540	XP_002322693.1	predicted protein	Populus trichocarpa	445	214	3e-54	0.84	0.9	-2
32-N02	905	XP_002322691.1	predicted protein	Populus trichocarpa	291	259	3e-67	0.62	0.71	2	sp|Q8VZ02	BH048_ARATH Transcription factor bHLH48	Arabidopsisthaliana	327	224	5e-58	0.55	0.66	2
32-N20	926	XP_002300690.1	predicted protein	Populus trichocarpa	205	206	4e-78	0.65	0.77	3	sp|Q80ZQ9	CI006_MOUSE UPF0436 protein C9orf6 homolog	Musmusculus	193	59.3	1e-17	0.31	0.52	3
32-O05	518	XP_002283047.1	PREDICTED: hypothetical protein	Vitis vinifera	439	144	3e-33	0.63	0.76	3	sp|O04373	ILL4_ARATH IAA-amino acid hydrolase ILR1-like 4	Arabidopsis thaliana	440	110	4e-24	0.53	0.76	3
32-O18	800	XP_002331232.1	predicted protein	Populus trichocarpa	399	310	1e-82	0.75	0.83	2	sp|P46573	APK1B_ARATH Protein kinase APK1B, chloroplastic	Arabidopsis thaliana	412	284	6e-76	0.69	0.79	2
32-O20	819	CAN81101.1	hypothetical protein	Vitis vinifera	978	518	e-145	0.96	0.99	3	sp|O88761	PSMD1_RAT 26S proteasome non-ATPase regulatory subunit 1	Rattus norvegicus	953	337	8e-92	0.6	0.77	3
32-P10	832	XP_002317353.1	predicted protein	Populus trichocarpa	305	296	1e-78	0.96	0.97	1	sp|P48528	PPX2_ARATH Serine/threonine-protein phosphatase PP-Xisozyme 2	Arabidopsis thaliana	305	291	3e-78	0.95	0.97	1
33-A01	890	XP_002264572.1	PREDICTED: hypothetical protein	Vitis vinifera	756	330	9e-89	0.83	0.91	3
33-A02	760	XP_002298727.1	predicted protein	Populus trichocarpa	311	363	1e-98	0.91	0.97	3	sp|Q5RDB8	NIPA3_PONAB Magnesium transporter NIPA3	Pongo abeli	410	205	2e-52	0.52	0.71	3
33-A09	786	EEF52011.1	conserved hypothetical protein	Ricinus communis	306	197	7e-49	0.54	0.63	-1	sp|Q84WP5	U497A_ARATH UPF0497 membrane protein At2g36330	Arabidopsis thaliana	283	182	2e-45	0.6	0.69	-1
33-A15	845	XP_002277245.1	PREDICTED: hypothetical protein	Vitis vinifera	681	476	e-132	0.93	0.98	3	sp|B9RUN8	GUF1_RICCO Translation factor GUF1 homolog, mitochondrial	Ricinus communis	673	475	e-133	0.94	0.98	3
33-A17	509	XP_002326731.1	predicted protein	Populus trichocarpa	305	101	3e-20	0.6	0.72	3
33-A24	867	CAO64702.1	unnamed protein product	Vitis vinifera	572	345	e-101	0.65	0.76	1	sp|Q0WP01	PTR9_ARATH Probable peptide/nitrate transporter At1g22540	Arabidopsis thaliana	557	296	1e-87	0.56	0.72	1
33-B08	645	YP_002442468.1	hypothetical protein PLES_48871	Pseudomonas aeruginosa LESB58	210	124	6e-27	0.67	0.75	-2	sp|O31708	YKNV_BACSU Uncharacterized ABC transporter ATP-bindingprotein YknV	Bacillus subtilis	604	51.2	6e-06	0.58	0.78	1
33-B12	792	EEF45947.1	conserved hypothetical protein	Ricinus communis	2119	449	e-124	0.88	0.93	3
33-B13	742	XP_002279493.1	PREDICTED: hypothetical protein isoform 1	Vitis vinifera	313	309	2e-82	0.79	0.84	1	sp|Q28G05	SYF2_XENTR Pre-mRNA-splicing factor syf2	Xenopustropicalis	249	88.6	4e-17	0.32	0.48	1
33-B17	658	XP_002273333.1	PREDICTED: hypothetical protein	Vitis vinifera	272	224	5e-57	0.81	0.85	3
33-B21	763	XP_002267817.1	PREDICTED: hypothetical protein	Vitis vinifera	507	374	e-102	0.87	0.95	3	sp|Q7M3S9	RNGB_DICDI RING finger protein B	Dictyosteliumdiscoideum	943	97.8	7e-20	0.3	0.51	3
33-C07	647	XP_002309950.1	predicted protein	Populus trichocarpa	578	335	2e-90	0.72	0.84	1	sp|P52831	HYIN_PSESY Indoleacetamide hydrolase	Pseudomonassyringae pv. syringae	446	108	3e-23	0.35	0.49	1
33-C13	655	XP_002331738.1	predicted protein	Populus trichocarpa	150	218	4e-55	0.82	0.89	3	sp|Q9M015	Y5161_ARATH Uncharacterized protein At5g01610	Arabidopsis thaliana	170	52.4	3e-06	0.24	0.5	3
33-C18	618	XP_002308229.1	predicted protein	Populus trichocarpa	232	137	7e-31	0.78	0.89	1	sp|Q9LMK7	RBP1A_ARATH Ran-binding protein 1 homolog a	Arabidopsis thaliana	228	119	1e-26	0.66	0.83	1
33-D09	499	ABK96787.1	unknown	Populus trichocarpa x Populus deltoides	222	149	7e-35	0.59	0.7	1
33-D11	581	CAO15841.1	unnamed protein product	Vitis vinifera	261	126	1e-27	0.63	0.69	2
33-D17	721	XP_002301986.1	predicted protein	Populus trichocarpa	1082	186	2e-45	0.45	0.6	2	sp|Q9C698	FPP6_ARATH Filament-like plant protein 6	Arabidopsisthaliana	1054	105	4e-22	0.38	0.51	2
33-D22	674	XP_002284543.1	PREDICTED: hypothetical protein	Vitis vinifera	862	221	3e-56	0.56	0.68	2	sp|Q94JM3	ARFB_ARATH Auxin response factor 2	Arabidopsis thalian	859	121	4e-27	0.39	0.55	2
33-E06	251	XP_002263475.1	PREDICTED: hypothetical protein	Vitis vinifera	657	79.3	1e-13	0.76	0.86	1
33-E12	742	YP_001176047.1	hypothetical protein Ent638_1315	Enterobacter sp. 638	420	202	3e-50	0.72	0.81	-2	sp|P75791	YBIU_ECOLI Uncharacterized protein ybiU	Escherichiacoli (strain K12)	421	197	6e-50	0.69	0.81	-2
33-E13	668	XP_002310029.1	predicted protein	Populus trichocarpa	362	258	4e-67	0.57	0.74	2	sp|Q9SJ04	SKIP6_ARATH F-box/kelch-repeat protein SKIP6	Arabidopsis thaliana	372	228	3e-59	0.53	0.7	2
33-E14	621	EEF47859.1	conserved hypothetical protein	Ricinus communis	224	179	1e-43	0.7	0.82	2
33-E15	776	XP_002320998.1	predicted protein	Populus trichocarpa	510	263	2e-98	0.83	0.91	3	sp|O81416	GUN17_ARATH Endoglucanase 17	Arabidopsis thalian	516	239	8e-92	0.78	0.86	3
33-E17	717	EEF52002.1	conserved hypothetical protein	Ricinus communis	535	105	3e-21	0.42	0.56	1	sp|Q9FXT6	PEX14_ARATH Peroxisomal membrane protein PEX14	Arabidopsis thaliana	507	52.4	3e-06	0.3	0.4	1
33-E18	561	EEF36421.1	conserved hypothetical protein	Ricinus communis	728	79.7	1e-13	0.61	0.72	3
33-F03	858	XP_002313006.1	predicted protein	Populus trichocarpa	207	223	2e-56	0.71	0.72	1	sp|P59228	VATL2_ARATH V-type proton ATPase 16 kDa proteolipidsubunit c2	Arabidopsis thaliana	165	223	2e-57	0.74	0.74	1
33-F06	770	XP_002280187.1	PREDICTED: hypothetical protein	Vitis vinifera	315	74.7	9e-12	0.43	0.57	3
33-F07	716	XP_002281313.1	PREDICTED: hypothetical protein	Vitis vinifera	340	333	9e-90	0.93	0.96	2	sp|P23525	IN37_SPIOL 37 kDa inner envelope membrane protein,chloroplastic	Spinacia oleracea	344	320	8e-87	0.88	0.94	2
33-F10	693	XP_002265446.1	PREDICTED: hypothetical protein	Vitis vinifera	277	126	2e-27	0.37	0.51	1
33-F16	871	XP_002313386.1	predicted protein	Populus trichocarpa	575	268	7e-70	0.54	0.66	2
33-G02	749	CAN71438.1	hypothetical protein	Vitis vinifera	1484	116	2e-24	0.55	0.72	3	sp|P93295	M310_ARATH Uncharacterized mitochondrial proteinAtMg00310	Arabidopsis thaliana	154	82.8	2e-15	0.43	0.67	3
33-G03	813	XP_002262697.1	PREDICTED: hypothetical protein	Vitis vinifera	245	366	2e-99	0.76	0.8	3	sp|Q9LHP1	RL74_ARATH 60S ribosomal protein L7-4	Arabidopsisthaliana	244	346	9e-95	0.71	0.78	3
33-G05	800	ABK94929.1	unknown	Populus trichocarpa	544	313	9e-84	0.69	0.8	1	sp|Q84W92	ANM13_ARATH Probable histone-arginine methyltransferase1.3	Arabidopsis thaliana	535	275	3e-73	0.62	0.76	1
33-G06	599	CAO64660.1	unnamed protein product	Vitis vinifera	513	226	1e-57	0.82	0.88	3	sp|Q5BJZ6	CI041_RAT UPF0586 protein C9orf41 homolog	Rattusnorvegicus	400	117	5e-26	0.46	0.62	3
33-G14	636	YP_002873248.1	hypothetical protein PFLU3690	Pseudomonas fluorescens SBW25	454	189	1e-46	0.8	0.83	2	sp|O34974	MOXC_BACSU Putative monooxygenase moxC	Bacillussubtilis	442	119	2e-26	0.51	0.61	2
33-G16	667	XP_002324466.1	predicted protein	Populus trichocarpa	139	101	5e-20	0.67	0.71	3
33-G18	816	EEF47321.1	conserved hypothetical protein	Ricinus communis	1065	261	6e-68	0.61	0.66	2	sp|Q8WTW3	COG1_HUMAN Conserved oligomeric Golgi complex subunit 1	Homo sapiens	980	107	1e-22	0.31	0.44	2
33-H05	787	XP_002336061.1	predicted protein	Populus trichocarpa	439	437	e-121	0.8	0.89	1	sp|Q1QRM1	GLND_NITHX [Protein-PII] uridylyltransferase	Nitrobacterhamburgensis (strain X14 / DSM 10229)	931	57	1e-07	0.42	0.59	1
33-H10	556	XP_002321750.1	predicted protein	Populus trichocarpa	919	57.8	5e-07	0.59	0.78	1
33-H12	480	XP_002282179.1	PREDICTED: hypothetical protein	Vitis vinifera	487	248	1e-64	0.85	0.94	1	sp|Q8R3D1	TBC13_MOUSE TBC1 domain family member 13	Mus musculu	400	112	1e-24	0.43	0.66	1
33-I07	588	XP_002307895.1	predicted protein	Populus trichocarpa	270	229	1e-58	0.83	0.9	1	sp|P54928	IMP3_SOLLC Inositol monophosphatase 3	Solanumlycopersicum	268	205	2e-52	0.74	0.84	1
33-I09	858	XP_002263206.1	PREDICTED: hypothetical protein	Vitis vinifera	639	515	e-144	0.86	0.93	1	sp|P55195	PUR6_VIGAC Phosphoribosylaminoimidazole carboxylase,chloroplastic (Fragment)	Vigna aconitifolia	557	416	e-115	0.72	0.84	1
33-I10	748	XP_002321837.1	predicted protein	Populus trichocarpa	385	291	3e-77	0.68	0.81	3	sp|Q640V2	RMD5A_XENTR Protein RMD5 homolog A	Xenopus tropicali	391	87.8	7e-17	0.29	0.51	3
33-I14	880	XP_002268884.1	PREDICTED: hypothetical protein	Vitis vinifera	1018	280	1e-73	0.79	0.91	-3	sp|Q8W4K1	TYW23_ARATH tRNA wybutosine-synthesizing protein 2/3/4	Arabidopsis thaliana	995	273	1e-72	0.78	0.91	-3
33-I20	858	EEF52310.1	conserved hypothetical protein	Ricinus communis	390	387	e-106	0.82	0.91	2	sp|O74913	YJ72_SCHPO Uncharacterized protein C757.02c	Schizosaccharomyces pombe	405	70.1	2e-11	0.27	0.45	2
33-I23	823	EEF34987.1	conserved hypothetical protein	Ricinus communis	361	136	2e-30	0.46	0.62	3
33-J04	831	XP_002313489.1	predicted protein	Populus trichocarpa	173	166	2e-39	0.53	0.66	3
33-J06	823	XP_002270362.1	PREDICTED: hypothetical protein	Vitis vinifera	417	442	e-122	0.79	0.82	1	sp|P43644	DNJH_ATRNU DnaJ protein homolog ANJ1	Atriplexnummularia	417	434	e-121	0.78	0.81	1
33-J10	870	XP_002285846.1	PREDICTED: hypothetical protein	Vitis vinifera	189	295	8e-85	0.82	0.92	2	sp|Q641Z5	CHAC2_RAT Cation transport regulator-like protein 2	Rattus norvegicus	178	159	2e-38	0.52	0.65	2
33-J23	772	XP_002320545.1	predicted protein	Populus trichocarpa	180	157	1e-36	0.54	0.68	3
33-K01	917	XP_002305449.1	predicted protein	Populus trichocarpa	731	421	e-116	0.86	0.94	3	sp|Q10RB4	BGAL5_ORYSJ Beta-galactosidase 5	Oryza sativa subsp.japonica	841	404	e-112	0.84	0.91	3
33-K03	710	XP_002276707.1	PREDICTED: hypothetical protein	Vitis vinifera	573	219	1e-55	0.53	0.63	1	sp|Q2GAU7	ENGB_NOVAD Probable GTP-binding protein engB	Novosphingobium aromaticivorans (strain DSM 12444	217	53.5	1e-06	0.65	0.75	1
33-K05	767	YP_001631737.1	hypothetical protein Bpet3127	Bordetella petrii DSM 12804	226	369	e-100	0.84	0.93	2	sp|Q8L8B8	LOG3_ARATH Cytokinin riboside 5'-monophosphatephosphoribohydrolase LOG3	Arabidopsis thalian	215	61.6	6e-09	0.23	0.48	2
33-L04	584	EEF28425.1	conserved hypothetical protein	Ricinus communis	100	69.7	1e-10	0.46	0.51	2
33-L05	955	XP_002283009.1	PREDICTED: hypothetical protein	Vitis vinifera	462	377	e-102	0.72	0.83	2
33-L07	922	YP_346062.1	hypothetical protein Pfl01_0329	Pseudomonas fluorescens Pf0-1	462	166	2e-39	0.36	0.55	1
33-L18	899	XP_002311140.1	predicted protein	Populus trichocarpa	794	80.5	9e-21	0.46	0.63	3
33-L22	871	XP_002303026.1	predicted protein	Populus trichocarpa	544	360	7e-98	0.68	0.82	3	sp|Q9UZC8	RAD50_PYRAB DNA double-strand break repair rad50 ATPase	Pyrococcus abyssi	880	55.1	6e-07	0.29	0.44	3
33-N08	736	CAN66404.1	hypothetical protein	Vitis vinifera	437	56.6	2e-06	0.34	0.55	1
33-N13	857	XP_002280239.1	PREDICTED: hypothetical protein	Vitis vinifera	880	415	e-114	0.73	0.82	1	sp|Q11011	PSA_MOUSE Puromycin-sensitive aminopeptidase	Musmusculus	920	147	7e-35	0.34	0.54	1
33-N14	492	XP_002266531.1	PREDICTED: hypothetical protein	Vitis vinifera	95	124	4e-27	0.73	0.88	2
33-N17	627	XP_002326588.1	predicted protein	Populus trichocarpa	90	134	8e-30	0.73	0.83	-2	sp|Q39779	ACBP_GOSHI Acyl-CoA-binding protein	Gossypium hirsutu	89	132	2e-30	0.75	0.78	-2
33-N22	460	XP_002458950.1	hypothetical protein SORBIDRAFT_03g043260	Sorghum bicolor	61	67.4	4e-10	0.51	0.63	3
33-O22	863	XP_002305969.1	hypothetical protein POPTRDRAFT_1076074	Populus trichocarpa	441	485	e-135	0.75	0.87	1
33-O23	739	XP_002312096.1	predicted protein	Populus trichocarpa	224	336	1e-90	0.83	0.91	3
33-P04	834	CAO70983.1	unnamed protein product	Vitis vinifera	547	239	3e-61	0.58	0.65	3	sp|Q9LUS8	P2C40_ARATH Probable protein phosphatase 2C 40	Arabidopsis thaliana	493	209	1e-53	0.56	0.66	3
33-P08	807	XP_002312271.1	predicted protein	Populus trichocarpa	178	314	7e-84	0.87	0.92	3	sp|Q9M015	Y5161_ARATH Uncharacterized protein At5g01610	Arabidopsis thaliana	170	180	9e-45	0.5	0.73	3
33-P17	693	XP_002266125.1	PREDICTED: hypothetical protein	Vitis vinifera	294	290	6e-77	0.95	0.98	1	sp|P93101	CDC2_CHERU Cell division control protein 2 homolog	Chenopodium rubrum	294	275	3e-73	0.89	0.96	1
33-P21	803	XP_002272679.1	PREDICTED: hypothetical protein	Vitis vinifera	604	269	3e-70	0.89	0.96	-2
33-P22	851	XP_002276190.1	PREDICTED: hypothetical protein isoform 2	Vitis vinifera	245	468	e-130	0.94	0.98	3	sp|Q9M060	IF62_ARATH Eukaryotic translation initiation factor 6-2	Arabidopsis thaliana	245	462	e-129	0.91	0.99	3
34-A02	774	XP_002313058.1	predicted protein	Populus trichocarpa	2017	300	1e-79	0.92	0.96	3	sp|Q9SXA1	P4KA1_ARATH Phosphatidylinositol 4-kinase alpha	Arabidopsis thaliana	2028	294	4e-79	0.91	0.96	3
34-A04	908	XP_002329902.1	predicted protein	Populus trichocarpa	577	318	6e-85	0.61	0.67	3	sp|Q43468	STIP_SOYBN Heat shock protein STI	Glycine max	569	171	6e-42	0.4	0.48	3
34-A10	882	XP_002301822.1	predicted protein	Populus trichocarpa	233	292	3e-77	0.61	0.66	1
34-A21	527	XP_002277138.1	PREDICTED: hypothetical protein	Vitis vinifera	217	140	7e-32	0.7	0.8	1
34-B07	767	XP_002274374.1	PREDICTED: hypothetical protein	Vitis vinifera	296	209	2e-52	0.51	0.62	1	sp|Q42430	ZFP1_WHEAT Zinc finger protein 1	Triticum aestivu	261	74.7	6e-13	0.36	0.47	1
34-B19	851	XP_002275632.1	PREDICTED: hypothetical protein	Vitis vinifera	268	336	1e-90	0.72	0.83	2	sp|Q01105	SET_HUMAN Protein SET	Homo sapiens	290	157	9e-38	0.39	0.57	2
34-C02	670	XP_002316266.1	predicted protein	Populus trichocarpa	408	289	2e-76	0.87	0.94	2	sp|Q9SRV1	BPM4_ARATH BTB/POZ and MATH domain-containing protein 4	Arabidopsis thaliana	465	259	8e-69	0.73	0.84	2
34-C06	799	XP_002323893.1	predicted protein	Populus trichocarpa	143	264	6e-69	0.88	0.95	3	sp|Q9FNP8	RS193_ARATH 40S ribosomal protein S19-3	Arabidopsisthaliana	143	258	3e-68	0.85	0.93	3
34-C11	862	XP_002265757.1	PREDICTED: hypothetical protein	Vitis vinifera	464	285	3e-75	0.71	0.8	3	sp|O94260	G3BP_SCHPO Putative G3BP-like protein	Schizosaccharomyces pombe	434	110	2e-23	0.33	0.51	3
34-C18	804	EEF35923.1	conserved hypothetical protein	Ricinus communis	291	311	7e-90	0.79	0.91	2
34-D06	781	XP_002314551.1	predicted protein	Populus trichocarpa	324	300	1e-79	0.84	0.87	2	sp|P28643	FABG_CUPLA 3-oxoacyl-[acyl-carrier-protein] reductase,chloroplastic	Cuphea lanceolata	320	290	6e-78	0.8	0.85	2
34-D09	724	XP_002283507.1	PREDICTED: hypothetical protein	Vitis vinifera	162	172	2e-41	0.6	0.69	1	sp|Q9ZT50	RHA2A_ARATH E3 ubiquitin-protein ligase RHA2A	Arabidopsis thaliana	155	138	3e-32	0.6	0.75	1
34-D11	682	BAF36296.1	hypothetical protein	Ipomoea trifida	1291	157	6e-37	0.91	0.95	1	sp|Q6PS57	CKS1_ORYSJ Cyclin-dependent kinases regulatory subunit 1	Oryza sativa subsp. japonica	90	155	2e-37	0.97	1	1
34-D20	823	XP_002282457.1	PREDICTED: hypothetical protein	Vitis vinifera	311	307	7e-82	0.59	0.69	2	sp|O64654	TRL11_ARATH Thioredoxin-like 1-1, chloroplastic	Arabidopsis thaliana	275	282	2e-75	0.58	0.73	2
34-E06	613	XP_002311252.1	predicted protein	Populus trichocarpa	144	139	1e-31	0.5	0.63	1	sp|Q94AR4	CID2_ARATH Polyadenylate-binding protein-interactingprotein 2	Arabidopsis thaliana	143	60.5	8e-09	0.62	0.8	1
34-E15	732	XP_002302478.1	predicted protein	Populus trichocarpa	429	358	4e-97	0.73	0.81	2
34-E16	427	EEF50077.1	conserved hypothetical protein	Ricinus communis	119	154	2e-36	0.81	0.91	1
34-F06	782	XP_002279715.1	PREDICTED: hypothetical protein	Vitis vinifera	487	292	2e-77	0.65	0.68	3	sp|P93768	PSMD3_TOBAC Probable 26S proteasome non-ATPase regulatorysubunit 3	Nicotiana tabacum	488	285	2e-76	0.64	0.68	3
34-F17	923	XP_002278704.1	PREDICTED: hypothetical protein	Vitis vinifera	244	298	7e-79	0.68	0.76	1
34-F22	661	XP_002313525.1	predicted protein	Populus trichocarpa	586	244	5e-63	0.79	0.85	2	sp|P34794	RUB2_BRANA RuBisCO large subunit-binding protein subunitalpha, chloroplastic	Brassica napus	583	231	4e-60	0.78	0.83	2
34-G04	754	XP_002323542.1	predicted protein	Populus trichocarpa	171	236	1e-60	0.7	0.85	1
34-G06	806	XP_002331720.1	predicted protein	Populus trichocarpa	936	303	2e-80	0.8	0.87	2	sp|C0LGG9	Y5344_ARATH Probable LRR receptor-likeserine/threonine-protein kinase At1g53440	Arabidopsisthaliana	1035	273	8e-73	0.72	0.84	2
34-G09	779	XP_002285601.1	PREDICTED: hypothetical protein	Vitis vinifera	462	102	4e-20	0.49	0.57	1
34-G11	710	XP_002279613.1	PREDICTED: hypothetical protein	Vitis vinifera	886	190	9e-47	0.81	0.9	2	sp|Q9FJX6	FH6_ARATH Formin-like protein 6	Arabidopsis thalian	899	152	2e-36	0.69	0.81	2
34-G18	933	XP_002268622.1	PREDICTED: hypothetical protein	Vitis vinifera	436	490	e-137	0.85	0.94	3	sp|O22932	CIPKB_ARATH CBL-interacting serine/threonine-proteinkinase 11	Arabidopsis thaliana	435	444	e-124	0.72	0.88	3
34-H05	659	XP_002315622.1	predicted protein	Populus trichocarpa	485	159	1e-37	1	1	3	sp|O07948	NUOF_RHOCA NADH-quinone oxidoreductase subunit F	Rhodobacter capsulatus	431	133	9e-31	0.78	0.9	3
34-H08	839	XP_002330025.1	predicted protein	Populus trichocarpa	415	447	e-124	0.89	0.94	2	sp|Q5R478	AP3M1_PONAB AP-3 complex subunit mu-1	Pongo abeli	418	241	6e-63	0.5	0.68	2
34-H11	906	CAO61923.1	unnamed protein product	Vitis vinifera	1611	221	8e-56	0.42	0.57	1	sp|Q2LAE1	ASHH2_ARATH Histone-lysine N-methyltransferase ASHH2	Arabidopsis thaliana	1759	128	6e-29	0.35	0.44	1
34-H15	874	XP_002282104.1	PREDICTED: hypothetical protein	Vitis vinifera	455	304	6e-81	0.57	0.69	2	sp|Q9WY68	1A1D_THEMA Putative 1-aminocyclopropane-1-carboxylatedeaminase	Thermotoga maritima	312	54.3	1e-06	0.34	0.43	2
34-H16	890	CAN83188.1	hypothetical protein	Vitis vinifera	452	45.4	4e-07	0.21	0.42	2
34-H17	712	XP_002284271.1	PREDICTED: hypothetical protein	Vitis vinifera	146	233	2e-59	0.82	0.89	1	sp|Q87SU3	RL27_VIBPA 50S ribosomal protein L27	Vibrioparahaemolyticus	85	115	3e-25	0.68	0.79	1
34-H21	602	ABR17957.1	unknown	Picea sitchensis	113	105	2e-21	0.51	0.57	2	sp|P52855	RLA1_MAIZE 60S acidic ribosomal protein P1	Zea may	109	94.4	5e-19	0.5	0.55	2
34-I01	858	ABK94420.1	unknown	Populus trichocarpa	322	74.3	1e-11	0.35	0.45	3
34-I04	625	XP_002303732.1	predicted protein	Populus trichocarpa	284	160	8e-38	0.63	0.74	1	sp|P43333	RU2A_ARATH U2 small nuclear ribonucleoprotein A'	Arabidopsis thaliana	249	114	6e-25	0.6	0.7	1
34-I07	639	XP_002328263.1	predicted protein	Populus trichocarpa	622	187	6e-46	0.83	0.88	2	sp|Q9SL48	SLY1_ARATH SEC1 family transport protein SLY1	Arabidopsis thaliana	627	155	3e-37	0.72	0.78	2
34-I11	904	XP_002325482.1	predicted protein	Populus trichocarpa	244	260	1e-67	0.64	0.75	3	sp|Q8GYH6	RTNLP_ARATH Reticulon-like protein B16	Arabidopsisthaliana	226	246	1e-64	0.54	0.7	3
34-I20	945	CAO44241.1	unnamed protein product	Vitis vinifera	414	278	4e-73	0.61	0.68	3
34-I23	793	XP_002329233.1	predicted protein	Populus trichocarpa	258	417	e-115	0.81	0.93	2	sp|O24496	GLO2C_ARATH Hydroxyacylglutathione hydrolase cytoplasmic	Arabidopsis thaliana	258	396	e-110	0.78	0.88	2
34-J02	878	XP_002323971.1	predicted protein	Populus trichocarpa	401	266	2e-69	0.61	0.68	3	sp|P73962	MENA_SYNY3 Probable 1,4-dihydroxy-2-naphthoateoctaprenyltransferase	Synechocystis sp. (strain ATCC27184 / PCC 6803 / N-1)	307	125	3e-28	0.46	0.6	3
34-J04	790	CAO65285.1	unnamed protein product	Vitis vinifera	317	447	e-124	0.92	0.96	2	sp|P54069	BEM46_SCHPO Protein bem46	Schizosaccharomyces pomb	299	157	8e-38	0.4	0.57	2
34-J09	819	XP_002323979.1	predicted protein	Populus trichocarpa	386	179	4e-43	0.48	0.63	2
34-J11	745	XP_002268743.1	PREDICTED: hypothetical protein	Vitis vinifera	271	251	5e-65	0.89	0.94	2	sp|O74926	RBD2_SCHPO Rhomboid protein 2	Schizosaccharomycespombe	248	53.1	2e-06	0.28	0.46	2
34-J15	690	CAN66875.1	hypothetical protein	Vitis vinifera	142	168	7e-44	0.91	0.93	3
34-J22	950	XP_002282707.1	PREDICTED: hypothetical protein	Vitis vinifera	359	550	e-155	0.91	0.96	2	sp|Q8C1A9	CD029_MOUSE Uncharacterized protein C4orf29 homolog	Mus musculus	464	123	2e-27	0.35	0.55	2
34-K05	889	EEF44791.1	conserved hypothetical protein	Ricinus communis	190	213	2e-53	0.56	0.7	3
34-K11	886	EEF30014.1	conserved hypothetical protein	Ricinus communis	578	273	2e-71	0.57	0.71	3	sp|Q9H211	CDT1_HUMAN DNA replication factor Cdt1	Homo sapien	546	59.3	3e-08	0.22	0.46	3
34-K13	705	XP_002282159.1	PREDICTED: hypothetical protein	Vitis vinifera	438	190	9e-47	0.69	0.82	3	sp|Q8S2E6	Y1235_ORYSJ B3 domain-containing protein Os01g0723500	Oryza sativa subsp. japonica	402	77	1e-13	0.37	0.56	3
34-K20	822	CAN63417.1	hypothetical protein	Vitis vinifera	373	458	e-127	0.82	0.89	3	sp|A8MRC7	B3GT2_ARATH Probable beta-1,3-galactosyltransferase 2	Arabidopsis thaliana	407	450	e-126	0.81	0.87	3
34-L06	875	XP_002321931.1	predicted protein	Populus trichocarpa	384	171	8e-41	0.5	0.65	2	sp|Q5RCE6	RL1D1_PONAB Ribosomal L1 domain-containing protein 1	Pongo abelii	490	77.4	1e-13	0.3	0.63	2
34-L10	834	XP_002274479.1	PREDICTED: similar to 2-oxo acid dehydrogenase, lipoyl-binding site	Vitis vinifera	2286	250	1e-64	0.74	0.84	1
34-L15	752	XP_002301985.1	predicted protein	Populus trichocarpa	851	142	4e-32	0.72	0.82	1	sp|Q9FQ03	XRN3_ARATH 5'-3' exoribonuclease 3	Arabidopsisthaliana	1020	131	6e-30	0.63	0.79	1
34-M19	862	XP_002305421.1	predicted protein	Populus trichocarpa	254	296	2e-78	0.64	0.76	1	sp|Q96E22	NGBR_HUMAN Nogo-B receptor	Homo sapiens	293	59.7	3e-08	0.26	0.46	1
34-N05	847	XP_002326716.1	predicted protein	Populus trichocarpa	164	203	1e-50	0.63	0.72	1
34-N08	828	CAN78706.1	hypothetical protein	Vitis vinifera	780	101	1e-19	0.28	0.47	-3
34-N09	870	XP_002264979.1	PREDICTED: similar to NFU4 (NFU domain protein 4)	Vitis vinifera	271	391	e-107	0.77	0.84	1	sp|Q9LIG6	NIFU4_ARATH NifU-like protein 4, mitochondrial	Arabidopsis thaliana	283	354	4e-97	0.69	0.78	1
34-N14	419	CAO46797.1	unnamed protein product	Vitis vinifera	488	162	1e-38	0.74	0.84	1	sp|O22307	C71DB_LOTJA Cytochrome P450 71D11 (Fragment)	Lotusjaponicus	490	154	1e-37	0.73	0.8	1
34-N23	849	XP_002307444.1	predicted protein	Populus trichocarpa	361	271	6e-71	0.51	0.63	2	sp|Q09912	PSI1_SCHPO Protein psi1	Schizosaccharomyces pomb	379	137	9e-32	0.42	0.57	2
34-O08	902	XP_002284019.1	PREDICTED: hypothetical protein isoform 1	Vitis vinifera	675	455	e-126	0.7	0.79	2	sp|Q9MA55	ACBP4_ARATH Acyl-CoA-binding domain-containing protein 4	Arabidopsis thaliana	668	419	e-116	0.65	0.76	2
34-O11	845	XP_002312408.1	predicted protein	Populus trichocarpa	280	76.3	4e-12	0.39	0.5	2
34-O13	541	XP_002304206.1	hypothetical protein POPTRDRAFT_712066	Populus trichocarpa	144	164	4e-39	0.71	0.77	3	sp|O04006	PSAH_BRARA Photosystem I reaction center subunit VI,chloroplastic	Brassica rapa	145	160	3e-39	0.85	0.93	3
34-O15	831	XP_002264191.1	PREDICTED: hypothetical protein	Vitis vinifera	607	344	5e-93	0.54	0.62	2
34-O20	312	XP_002326941.1	predicted protein	Populus trichocarpa	209	62.4	1e-08	0.76	0.81	1	sp|Q42463	DCL_SOLLC Protein DCL, chloroplastic	Solanumlycopersicum	224	61.6	1e-09	0.76	0.81	1
34-O22	675	XP_002263210.1	PREDICTED: hypothetical protein	Vitis vinifera	292	68.2	6e-10	0.87	0.92	2	sp|Q8RXV3	P2C59_ARATH Probable protein phosphatase 2C 59	Arabidopsis thaliana	311	52.4	3e-06	0.64	0.73	2
34-P08	396	XP_002277447.1	PREDICTED: hypothetical protein	Vitis vinifera	68	55.5	2e-06	0.55	0.72	3
35-A04	786	XP_002311854.1	predicted protein	Populus trichocarpa	566	63.5	2e-08	0.62	0.81	2
35-A14	589	EEF39714.1	conserved hypothetical protein	Ricinus communis	227	99.8	1e-19	0.38	0.54	3
35-A15	846	XP_002271611.1	PREDICTED: hypothetical protein	Vitis vinifera	497	231	5e-59	0.46	0.55	1
35-A21	800	XP_002270765.1	PREDICTED: hypothetical protein	Vitis vinifera	418	358	4e-97	0.87	0.93	3	sp|Q9SA77	ARAE1_ARATH UDP-arabinose 4-epimerase 1	Arabidopsisthaliana	419	342	2e-93	0.82	0.9	3
35-A22	907	XP_002269956.1	PREDICTED: hypothetical protein	Vitis vinifera	211	80.5	2e-13	0.7	0.84	3
35-A24	852	XP_002272937.1	PREDICTED: hypothetical protein	Vitis vinifera	750	551	e-155	0.89	0.93	1	sp|Q6EU10	MTA70_ORYSJ Probable N6-adenosine-methyltransferaseMT-A70-like	Oryza sativa subsp. japonic	706	532	e-150	0.86	0.91	1
35-B09	449	XP_002438954.1	hypothetical protein SORBIDRAFT_10g028940	Sorghum bicolor	414	227	3e-58	0.85	0.88	2	sp|P41382	IF410_TOBAC Eukaryotic initiation factor 4A-10	Nicotiana tabacum	413	227	2e-59	0.85	0.89	2
35-B12	496	XP_002280503.1	PREDICTED: hypothetical protein	Vitis vinifera	694	81.3	3e-14	0.51	0.62	3	sp|Q8S8N9	GOGC1_ARATH Golgin candidate 1	Arabidopsis thalian	707	65.9	1e-10	0.42	0.55	3
35-B15	391	XP_002315461.1	predicted protein	Populus trichocarpa	650	54.3	4e-06	0.67	0.88	2
35-B23	260	XP_002285608.1	PREDICTED: similar to GroEL-like chaperone, ATPase	Vitis vinifera	575	88.2	3e-16	0.88	0.94	2	sp|Q05046	CH62_CUCMA Chaperonin CPN60-2, mitochondrial	Cucurbitamaxima	575	87.4	3e-17	0.84	0.94	2
35-C08	797	XP_002320085.1	predicted protein	Populus trichocarpa	742	342	2e-92	0.72	0.83	1	sp|Q9LLL8	XSP1_ARATH Xylem serine proteinase 1	Arabidopsisthaliana	749	300	1e-80	0.66	0.81	1
35-C13	200	XP_002317683.1	predicted protein	Populus trichocarpa	296	54.7	3e-06	0.75	0.83	1
35-C23	432	XP_002331103.1	predicted protein	Populus trichocarpa	313	181	2e-44	0.78	0.84	2
35-D02	330	XP_002272993.1	PREDICTED: hypothetical protein	Vitis vinifera	478	95.9	1e-18	0.57	0.72	1
35-D07	356	EEF34384.1	conserved hypothetical protein	Ricinus communis	379	82.8	1e-14	0.64	0.81	2
35-D18	502	XP_002274637.1	PREDICTED: hypothetical protein	Vitis vinifera	148	136	8e-31	0.86	0.9	2	sp|P82244	RK34_SPIOL 50S ribosomal protein L34, chloroplastic	Spinacia oleracea	152	124	3e-28	0.77	0.85	2
35-E12	416	XP_002263622.1	PREDICTED: hypothetical protein	Vitis vinifera	240	201	2e-50	0.8	0.88	2
35-E23	746	XP_002277300.1	PREDICTED: hypothetical protein	Vitis vinifera	484	177	9e-43	0.69	0.78	2	sp|Q5RJC5	C3H67_ARATH Zinc finger CCCH domain-containing protein 67	Arabidopsis thaliana	435	157	7e-38	0.62	0.8	2
35-F01	790	XP_002322853.1	predicted protein	Populus trichocarpa	176	253	1e-65	0.9	0.95	2	sp|Q67XJ2	NFYBA_ARATH Nuclear transcription factor Y subunit B-10	Arabidopsis thaliana	176	216	1e-55	0.79	0.88	2
35-F08	370	EEF47525.1	conserved hypothetical protein	Ricinus communis	483	98.2	2e-19	0.74	0.85	3	sp|Q9LU91	SKI14_ARATH F-box protein SKIP14	Arabidopsis thalian	453	65.9	8e-11	0.57	0.69	3
35-F11	761	EEF32020.1	conserved hypothetical protein	Ricinus communis	453	448	e-124	0.84	0.91	3	sp|Q8RWE8	GGAP1_ARATH GDP-L-galactose phosphorylase 1	Arabidopsis thaliana	442	395	e-109	0.76	0.84	3
35-F22	765	NP_188109.1	unknown protein	Arabidopsis thaliana	455	362	2e-98	0.68	0.85	2
35-G01	689	XP_002318837.1	predicted protein	Populus trichocarpa	873	118	5e-25	0.57	0.67	1
35-G02	878	XP_002307679.1	predicted protein	Populus trichocarpa	402	493	e-137	0.96	0.97	3	sp|Q9MAK9	PS10B_ARATH 26S protease regulatory subunit S10B homologB	Arabidopsis thaliana	399	482	e-135	0.93	0.95	3
35-G04	846	EEF28265.1	conserved hypothetical protein	Ricinus communis	350	382	e-104	0.87	0.94	2	sp|Q2KIJ2	CA156_BOVIN UPF0558 protein C1orf156 homolog	Bostaurus	373	77	1e-13	0.38	0.53	2
35-G05	912	XP_002281466.1	PREDICTED: hypothetical protein	Vitis vinifera	609	302	3e-80	0.86	0.94	1	sp|P90587	WD66_PHYPO 66 kDa stress protein	Physarum polycephalu	601	152	3e-36	0.45	0.67	1
35-G06	877	XP_002264200.1	PREDICTED: hypothetical protein	Vitis vinifera	229	288	4e-76	0.66	0.75	2	sp|Q8W487	YB95_ARATH Uncharacterized protein At2g39795,mitochondrial	Arabidopsis thaliana	250	68.6	6e-11	0.3	0.52	2
35-G10	497	XP_002279537.1	PREDICTED: hypothetical protein	Vitis vinifera	381	150	5e-35	0.71	0.88	2
35-G15	592	XP_981474.1	PREDICTED: similar to histone H4	Mus musculus	158	164	6e-39	0.77	0.79	1	sp|P0CG89	H4_SOYBN Histone H4	Glycine max	103	162	1e-39	1	1	1
35-G22	549	EEF27816.1	conserved hypothetical protein	Ricinus communis	126	107	5e-22	0.45	0.59	3
35-H07	452	XP_002317807.1	predicted protein	Populus trichocarpa	159	93.2	8e-18	0.85	0.94	2
35-H18	714	XP_002270256.1	PREDICTED: hypothetical protein	Vitis vinifera	306	239	2e-61	0.75	0.84	3	sp|Q00472	PNPP_SCHPO 4-nitrophenylphosphatase	Schizosaccharomyces pombe	298	116	2e-25	0.45	0.64	3
35-H19	820	XP_002309397.1	predicted protein	Populus trichocarpa	278	149	3e-34	0.46	0.55	2
35-H23	723	XP_002284804.1	PREDICTED: hypothetical protein	Vitis vinifera	816	165	4e-39	0.78	0.91	2
35-I08	850	CAO65541.1	unnamed protein product	Vitis vinifera	500	220	2e-55	0.79	0.85	2
35-I10	919	EEF39324.1	conserved hypothetical protein	Ricinus communis	225	235	4e-60	0.53	0.64	3	sp|Q84J70	DI193_ARATH Protein DEHYDRATION-INDUCED 19 homolog 3	Arabidopsis thaliana	223	158	4e-38	0.39	0.55	3
35-I11	777	XP_002325632.1	predicted protein	Populus trichocarpa	636	285	1e-96	0.71	0.84	3	sp|Q9LVM0	Y5830_ARATH Probable inactive receptor kinase At5g58300	Arabidopsis thaliana	654	267	1e-89	0.7	0.83	3
35-I22	529	XP_002302861.1	predicted protein	Populus trichocarpa	470	181	2e-44	0.84	0.88	1	sp|O65399	E131_ARATH Glucan endo-1,3-beta-glucosidase 1	Arabidopsis thaliana	402	112	2e-24	0.53	0.67	1
35-I23	682	XP_002300440.1	predicted protein	Populus trichocarpa	304	109	2e-22	0.34	0.49	1	sp|P22242	DRPE_CRAPL Desiccation-related protein PCC13-62	Craterostigma plantagineum	313	85.1	4e-16	0.31	0.51	1
35-J09	904	XP_002263587.1	PREDICTED: hypothetical protein	Vitis vinifera	770	387	e-106	0.81	0.9	2	sp|P60300	CLCG_ARATH Putative chloride channel-like protein CLC-g	Arabidopsis thaliana	763	336	2e-91	0.7	0.85	2
35-J15	893	XP_002330785.1	predicted protein	Populus trichocarpa	349	379	e-103	0.7	0.78	2	sp|Q9ZQ34	Y2433_ARATH Uncharacterized protein At2g24330	Arabidopsis thaliana	408	313	8e-85	0.54	0.66	2
35-J24	508	EEF32089.1	conserved hypothetical protein	Ricinus communis	84	89.4	1e-16	0.55	0.71	2
35-K05	870	XP_002308246.1	predicted protein	Populus trichocarpa	242	269	2e-70	0.57	0.73	3	sp|P07602	SAP_HUMAN Proactivator polypeptide	Homo sapien	524	79.7	2e-14	0.27	0.48	3
35-K21	798	EEF43619.1	conserved hypothetical protein	Ricinus communis	273	312	2e-83	0.65	0.8	3	sp|A4IT60	KYNB_GEOTN Kynurenine formamidase	Geobacillusthermodenitrificans (strain NG80-2)	209	84.7	7e-16	0.31	0.47	3
35-L03	807	XP_002265244.1	PREDICTED: hypothetical protein	Vitis vinifera	349	397	e-109	0.78	0.89	1	sp|Q9SLK2	ALIS3_ARATH ALA-interacting subunit 3	Arabidopsisthaliana	349	364	e-100	0.72	0.84	1
35-L22	603	ABK92988.1	unknown	Populus trichocarpa	157	149	1e-34	0.57	0.69	3
35-L24	871	XP_002322041.1	predicted protein	Populus trichocarpa	305	198	6e-49	0.64	0.73	3	sp|Q9S7P9	SNP33_ARATH SNAP25 homologous protein SNAP33	Arabidopsis thaliana	300	153	1e-36	0.51	0.65	3
35-M02	772	ABK95816.1	unknown	Populus trichocarpa	312	436	e-120	0.9	0.9	1	sp|Q9LT08	PSDE_ARATH 26S proteasome non-ATPase regulatory subunit14	Arabidopsis thaliana	308	413	e-115	0.87	0.89	1
35-M03	785	XP_002297781.1	predicted protein	Populus trichocarpa	512	118	7e-25	0.79	0.84	1	sp|Q9C5J8	OEP80_ARATH Outer envelope protein of 80 kDa,chloroplastic	Arabidopsis thaliana	732	114	6e-25	0.75	0.86	1
35-M06	533	XP_002315548.1	predicted protein	Populus trichocarpa	107	183	5e-45	0.77	0.88	2	sp|P0CB92	NDUA8_PONPY NADH dehydrogenase [ubiquinone] 1 alphasubcomplex subunit 8	Pongo pygmaeus	172	66.6	8e-11	0.32	0.58	2
35-M08	687	XP_002270339.1	PREDICTED: hypothetical protein	Vitis vinifera	116	120	8e-26	0.91	0.93	1
35-M14	845	XP_002285417.1	PREDICTED: hypothetical protein isoform 2	Vitis vinifera	273	504	e-141	0.89	0.93	1	sp|O23710	PSB7A_ARATH Proteasome subunit beta type-7-A	Arabidopsis thaliana	273	482	e-135	0.84	0.94	1
35-M16	425	XP_002300208.1	predicted protein	Populus trichocarpa	775	162	1e-38	0.93	0.97	1	sp|Q5KAM7	SEC23_CRYNE Protein transport protein SEC23	Cryptococcus neoformans	763	104	2e-22	0.6	0.72	1
35-M23	553	CAN82562.1	hypothetical protein	Vitis vinifera	1384	117	7e-25	0.44	0.65	1
35-M24	796	XP_002267996.1	PREDICTED: hypothetical protein	Vitis vinifera	254	263	1e-68	0.59	0.67	1
35-N03	844	CAN84081.1	hypothetical protein	Vitis vinifera	691	449	e-124	0.8	0.9	2
35-N09	335	EEF36084.1	conserved hypothetical protein	Ricinus communis	229	85.5	2e-15	0.5	0.62	3
35-N19	506	XP_002306500.1	predicted protein	Populus trichocarpa	333	181	2e-44	0.79	0.82	3	sp|P28523	CSK2A_MAIZE Casein kinase II subunit alpha	Zea may	332	176	5e-44	0.76	0.8	3
35-N22	779	CAQ58613.1	Unknown gene	Vitis vinifera	432	317	6e-85	0.75	0.83	1
35-O01	757	EEF43567.1	conserved hypothetical protein	Ricinus communis	402	199	2e-49	0.59	0.74	2
35-O07	838	XP_002284345.1	PREDICTED: hypothetical protein	Vitis vinifera	629	447	e-124	0.85	0.92	2	sp|Q9FMF5	RPT3_ARATH Root phototropism protein 3	Arabidopsisthaliana	745	210	9e-54	0.42	0.63	2
35-O08	836	XP_002272429.1	PREDICTED: similar to cdc2MsC	Vitis vinifera	517	73.6	2e-11	0.82	0.85	1	sp|Q6I5Y0	CDKC1_ORYSJ Cyclin-dependent kinase C-1	Oryza sativasubsp. japonica	519	53.9	1e-06	0.58	0.71	1
35-O10	840	XP_002277955.1	PREDICTED: hypothetical protein	Vitis vinifera	433	376	e-102	0.78	0.87	1	sp|Q8Z1T1	DUSA_SALTI tRNA-dihydrouridine synthase A	Salmonellatyphi	332	118	4e-26	0.39	0.51	1
35-O13	132	ACJ85790.1	unknown	Medicago truncatula	247	68.9	2e-10	0.84	0.92	1
35-O19	852	EEF37130.1	conserved hypothetical protein	Ricinus communis	434	280	2e-73	0.51	0.66	2	sp|Q9SY57	P2A10_ARATH Protein PHLOEM PROTEIN 2-LIKE A10	Arabidopsis thaliana	414	251	6e-66	0.44	0.68	2
35-O21	565	EEF32863.1	hypothetical protein RCOM_1716580	Ricinus communis	218	151	3e-35	0.48	0.64	1	sp|Q9FYJ2	OSB4_ARATH Protein OSB4, chloroplastic	Arabidopsisthaliana	360	131	2e-30	0.41	0.58	1
35-O22	813	XP_002316287.1	predicted protein	Populus trichocarpa	256	375	e-102	0.78	0.83	3	sp|P48495	TPIS_PETHY Triosephosphate isomerase, cytosolic	Petunia hybrida	254	370	e-102	0.76	0.82	3
35-P12	866	EEF34882.1	conserved hypothetical protein	Ricinus communis	282	114	9e-24	0.34	0.45	3
35-P17	709	XP_002277155.1	PREDICTED: hypothetical protein	Vitis vinifera	303	320	1e-85	0.72	0.84	2
36-A05	342	EEF33377.1	conserved hypothetical protein	Ricinus communis	64	117	5e-25	0.85	0.91	2	sp|Q0VBY0	MTCNB_BOVIN Mature T-cell proliferation 1 neighborprotein	Bos taurus	68	58.2	2e-08	0.52	0.75	2
36-A10	587	XP_002282535.1	PREDICTED: hypothetical protein	Vitis vinifera	541	362	1e-98	0.82	0.9	3	sp|Q54K56	HEXB2_DICDI Beta-hexosaminidase subunit B2	Dictyostelium discoideum	564	126	1e-28	0.36	0.52	3
36-A13	820	XP_002275382.1	PREDICTED: hypothetical protein	Vitis vinifera	293	523	e-147	0.98	0.99	1	sp|Q9M077	AUR1_ARATH Serine/threonine-protein kinase Aurora-1	Arabidopsis thaliana	294	506	e-143	0.95	0.98	1
36-A20	815	XP_002262625.1	PREDICTED: hypothetical protein	Vitis vinifera	627	412	e-113	0.96	0.99	3
36-B06	568	EEF48528.1	conserved hypothetical protein	Ricinus communis	318	237	5e-61	0.65	0.78	2
36-C07	734	XP_002317441.1	predicted protein	Populus trichocarpa	273	214	6e-54	0.86	0.95	2	sp|P73555	Y875_SYNY3 Uncharacterized membrane protein sll0875	Synechocystis sp. (strain ATCC 27184 / PCC 6803 /N-1)	258	123	1e-27	0.52	0.69	2
36-C10	707	XP_002301062.1	predicted protein	Populus trichocarpa	319	323	7e-87	0.65	0.77	3
36-C18	773	XP_002305684.1	predicted protein	Populus trichocarpa	234	292	2e-77	0.8	0.89	3	sp|A5EK46	LPXD_BRASB UDP-3-O-[3-hydroxymyristoyl] glucosamineN-acyltransferase	Bradyrhizobium sp. (strain BTAi1 /ATCC BAA-1182)	355	153	1e-36	0.51	0.65	3
36-D03	731	XP_002273724.1	PREDICTED: hypothetical protein	Vitis vinifera	301	313	1e-83	0.84	0.94	3	sp|Q0VMF9	RS6_ALCBS 30S ribosomal protein S6	Alcanivoraxborkumensis (strain SK2 / ATCC 700651 / DSM 11573	113	99.4	2e-20	0.45	0.64	3
36-E05	930	XP_002303651.1	predicted protein	Populus trichocarpa	200	156	3e-36	0.49	0.55	1
36-E15	521	XP_002285084.1	PREDICTED: hypothetical protein	Vitis vinifera	791	307	3e-82	0.78	0.9	1	sp|Q9SCV4	BGAL8_ARATH Beta-galactosidase 8	Arabidopsis thalian	852	288	1e-77	0.75	0.84	1
36-E18	762	XP_002285668.1	PREDICTED: hypothetical protein	Vitis vinifera	87	172	4e-41	0.96	0.98	1	sp|Q5R628	LSM5_PONAB U6 snRNA-associated Sm-like protein LSm5	Pongo abelii	91	132	2e-30	0.79	0.91	1
36-F05	840	XP_002268417.1	PREDICTED: hypothetical protein	Vitis vinifera	551	213	2e-53	0.52	0.65	3
36-F23	400	XP_002277180.1	PREDICTED: hypothetical protein	Vitis vinifera	272	79.3	1e-13	0.55	0.66	2
36-G02	527	CAN68216.1	hypothetical protein	Vitis vinifera	1253	70.1	9e-11	0.33	0.56	1
36-G05	917	XP_002267935.1	PREDICTED: hypothetical protein	Vitis vinifera	1218	509	e-142	0.89	0.95	2	sp|Q94A40	COPA1_ARATH Coatomer subunit alpha-1	Arabidopsisthaliana	1216	466	e-130	0.82	0.91	2
36-H12	758	XP_002317024.1	predicted protein	Populus trichocarpa	137	145	5e-33	0.7	0.82	1
36-H19	884	XP_002273105.1	PREDICTED: hypothetical protein	Vitis vinifera	1456	63.5	3e-08	0.36	0.48	3
36-I01	696	XP_002264759.1	PREDICTED: hypothetical protein	Vitis vinifera	333	202	3e-50	0.84	0.92	1	sp|Q3SWX0	NIPA2_BOVIN Magnesium transporter NIPA2	Bos tauru	360	93.2	1e-18	0.43	0.6	1
36-I08	898	XP_002273614.1	PREDICTED: hypothetical protein	Vitis vinifera	587	238	6e-61	0.51	0.6	3
36-I10	840	XP_002281744.1	PREDICTED: hypothetical protein	Vitis vinifera	332	170	1e-40	0.44	0.54	2
36-I12	786	XP_002315932.1	predicted protein	Populus trichocarpa	532	225	3e-57	0.8	0.94	1	sp|B3E1P0	SYC_GEOLS Cysteinyl-tRNA synthetase	Geobacter lovleyi(strain ATCC BAA-1151 / DSM 17278 / SZ)	487	153	1e-36	0.53	0.74	1
36-J05	863	XP_002321989.1	predicted protein	Populus trichocarpa	685	218	8e-55	0.64	0.73	2	sp|P58223	Y4837_ARATH KH domain-containing protein At4g18375	Arabidopsis thaliana	606	53.5	2e-06	0.36	0.6	2
36-J08	832	XP_002306708.1	predicted protein	Populus trichocarpa	389	415	e-114	0.92	0.97	2	sp|P35684	RL3_ORYSJ 60S ribosomal protein L3	Oryza sativa subsp.japonica	389	402	e-111	0.87	0.96	2
36-J11	655	XP_002331425.1	predicted protein	Populus trichocarpa	105	169	2e-40	0.81	0.89	2	sp|A4XLS1	RS17_CALS8 30S ribosomal protein S17	Caldicellulosiruptor saccharolyticus (strain ATCC43494 / DSM 8903)	86	95.5	3e-19	0.51	0.75	2
36-J20	425	XP_002263148.1	PREDICTED: hypothetical protein	Vitis vinifera	973	221	2e-56	0.74	0.88	1
36-J22	769	NP_001131164.1	hypothetical protein LOC100192472	Zea mays	194	77.8	1e-13	0.55	0.65	1	sp|P40940	ARF3_ARATH ADP-ribosylation factor 3	Arabidopsisthaliana	182	56.2	5e-08	0.45	0.58	1
36-K18	858	XP_002310656.1	predicted protein	Populus trichocarpa	533	309	2e-82	0.62	0.79	2
36-K19	727	XP_002312544.1	predicted protein	Populus trichocarpa	405	155	5e-36	0.52	0.66	2
36-L17	524	XP_002305397.1	predicted protein	Populus trichocarpa	143	265	2e-69	0.88	0.95	1	sp|Q9FNP8	RS193_ARATH 40S ribosomal protein S19-3	Arabidopsisthaliana	143	259	5e-69	0.86	0.93	1
36-M10	889	XP_002282278.1	PREDICTED: hypothetical protein	Vitis vinifera	296	461	e-128	0.77	0.84	2	sp|Q28CY2	EIF3G_XENTR Eukaryotic translation initiation factor 3subunit G	Xenopus tropicalis	310	198	4e-50	0.43	0.58	2
36-M22	364	ACR36344.1	unknown	Zea mays	643	145	1e-33	1	1	2	sp|Q6Z4K6	RH52B_ORYSJ DEAD-box ATP-dependent RNA helicase 52B	Oryza sativa subsp. japonica	638	143	4e-34	0.98	1	2
36-N08	784	XP_002305334.1	predicted protein	Populus trichocarpa	471	334	6e-90	0.97	0.99	3	sp|P52410	KASC1_ARATH 3-oxoacyl-[acyl-carrier-protein] synthase I,chloroplastic	Arabidopsis thaliana	473	318	2e-86	0.92	0.97	3
36-N14	846	CAN78706.1	hypothetical protein	Vitis vinifera	780	95.5	6e-18	0.25	0.47	1
36-N15	453	XP_002282974.1	PREDICTED: similar to protein synthesis initiation factor-like	Vitis vinifera	92	189	6e-47	1	1	3	sp|Q9XHE4	RL37A_GOSHI 60S ribosomal protein L37a	Gossypiumhirsutum	92	186	4e-47	0.98	0.98	3
36-P03	767	XP_002313577.1	predicted protein	Populus trichocarpa	575	367	e-100	0.69	0.79	3	sp|Q5I0I8	NOC4L_RAT Nucleolar complex protein 4 homolog	Rattusnorvegicus	516	182	2e-45	0.38	0.59	3
36-P15	919	EEF32384.1	conserved hypothetical protein	Ricinus communis	545	245	5e-63	0.52	0.65	2
37-A03	511	NP_196274.1	unknown protein	Arabidopsis thaliana	518	81.6	3e-14	0.67	0.83	3
37-A09	847	YP_002874890.1	hypothetical protein PFLU5392	Pseudomonas fluorescens SBW25	361	157	9e-37	0.45	0.49	-2
37-A16	339	XP_002332265.1	predicted protein	Populus trichocarpa	861	162	1e-38	0.69	0.82	1	sp|O81283	TC159_ARATH Translocase of chloroplast 159, chloroplastic	Arabidopsis thaliana	1503	155	7e-38	0.65	0.81	1
37-A21	837	XP_002283053.1	PREDICTED: hypothetical protein	Vitis vinifera	151	176	3e-42	0.56	0.67	2
37-B02	387	XP_002458500.1	hypothetical protein SORBIDRAFT_03g034800	Sorghum bicolor	164	66.2	1e-09	0.68	0.72	1
37-B08	855	XP_002280194.1	PREDICTED: hypothetical protein	Vitis vinifera	342	389	e-106	0.71	0.82	3	sp|A8WFS8	PGAP3_DANRE Post-GPI attachment to proteins factor 3	Danio rerio	316	127	7e-29	0.31	0.47	3
37-B10	540	XP_002276189.1	PREDICTED: hypothetical protein	Vitis vinifera	992	230	5e-59	0.71	0.81	1
37-B17	846	XP_002316900.1	predicted protein	Populus trichocarpa	293	469	e-130	0.91	0.99	2	sp|Q6MD00	KDSB_PARUW 3-deoxy-manno-octulosonatecytidylyltransferase	Protochlamydia amoebophila(strain UWE25)	259	223	1e-57	0.5	0.64	2
37-C05	849	XP_002298769.1	predicted protein	Populus trichocarpa	651	144	8e-33	0.47	0.54	2
37-C14	431	XP_002282246.1	PREDICTED: hypothetical protein isoform 2	Vitis vinifera	606	123	5e-27	0.96	1	1	sp|P0C0X5	PIN1B_ORYSJ Probable auxin efflux carrier component 1b	Oryza sativa subsp. japonica	554	118	1e-26	0.95	0.96	1
37-C17	195	EEF28365.1	conserved hypothetical protein	Ricinus communis	1613	122	2e-26	0.82	0.96	2
37-C19	827	XP_002267510.1	PREDICTED: hypothetical protein	Vitis vinifera	452	373	e-101	0.9	0.95	2	sp|O22609	DEGP1_ARATH Protease Do-like 1, chloroplastic	Arabidopsis thaliana	439	356	1e-97	0.87	0.93	2
37-C21	603	XP_002265235.1	PREDICTED: hypothetical protein	Vitis vinifera	246	186	9e-46	0.52	0.61	3
37-C22	706	XP_002282641.1	PREDICTED: similar to ribosomal protein L10a	Vitis vinifera	216	361	4e-98	0.85	0.88	3	sp|Q8VZB9	R10A1_ARATH 60S ribosomal protein L10a-1	Arabidopsisthaliana	216	351	2e-96	0.82	0.87	3
37-D07	324	XP_002436955.1	hypothetical protein SORBIDRAFT_10g012210	Sorghum bicolor	554	62.8	1e-08	0.88	0.94	2	sp|Q9FG23	CK5P3_ARATH CDK5RAP3-like protein	Arabidopsis thalian	549	57.4	3e-08	0.77	0.91	2
37-D10	658	XP_002262863.1	PREDICTED: hypothetical protein	Vitis vinifera	536	167	9e-40	0.62	0.78	3
37-D12	517	XP_002282760.1	PREDICTED: hypothetical protein	Vitis vinifera	406	321	2e-86	0.9	0.95	2	sp|Q0J2C6	ANM1_ORYSJ Probable protein arginine N-methyltransferase1	Oryza sativa subsp. japonica	387	305	8e-83	0.86	0.92	2
37-D13	888	XP_002284312.1	PREDICTED: hypothetical protein isoform 2	Vitis vinifera	575	473	e-132	0.93	0.97	1	sp|Q8RWZ6	PIN4_ARATH Auxin efflux carrier component 4	Arabidopsis thaliana	616	426	e-118	0.87	0.91	1
37-D24	398	XP_002268531.1	PREDICTED: hypothetical protein	Vitis vinifera	393	128	2e-28	0.75	0.85	2
37-E09	873	CAN59914.1	hypothetical protein	Vitis vinifera	356	144	8e-63	0.66	0.73	1
37-E18	463	XP_002307838.1	predicted protein	Populus trichocarpa	216	166	6e-40	0.78	0.82	2	sp|Q40193	RB11C_LOTJA Ras-related protein Rab11C	Lotus japonicu	216	163	4e-40	0.78	0.82	2
37-E21	884	XP_002331682.1	predicted protein	Populus trichocarpa	281	354	7e-96	0.91	0.97	1	sp|Q60700	M3K12_MOUSE Mitogen-activated protein kinase kinasekinase 12	Mus musculus	888	122	3e-27	0.4	0.57	1
37-F07	766	XP_002324082.1	predicted protein	Populus trichocarpa	176	226	2e-57	0.7	0.78	2	sp|Q39131	LAML_ARATH Lamin-like protein	Arabidopsis thalian	172	162	3e-39	0.65	0.78	2
37-F19	662	CAN71395.1	hypothetical protein	Vitis vinifera	408	204	5e-51	0.6	0.68	3	sp|Q9LTR2	TGD2_ARATH Protein TRIGALACTOSYLDIACYLGLYCEROL 2,chloroplastic	Arabidopsis thaliana	381	178	2e-44	0.57	0.64	3
37-G21	830	EAY76660.1	hypothetical protein OsI_04616	Oryza sativa Indica Group	1068	78.2	1e-20	0.68	0.82	2	sp|Q9FQ02	XRN2_ARATH 5'-3' exoribonuclease 2	Arabidopsisthaliana	1012	73.2	4e-20	0.59	0.75	2
37-H01	623	XP_002328262.1	predicted protein	Populus trichocarpa	371	332	1e-89	0.87	0.9	2	sp|Q8LFC0	IDH1_ARATH Isocitrate dehydrogenase [NAD] regulatorysubunit 1, mitochondrial	Arabidopsis thaliana	367	323	7e-88	0.85	0.89	2
37-H02	550	EEF30566.1	conserved hypothetical protein	Ricinus communis	66	113	1e-23	0.9	0.96	2
37-H04	473	XP_002269515.1	PREDICTED: hypothetical protein	Vitis vinifera	912	244	2e-63	0.76	0.83	1
37-H08	871	XP_002307959.1	predicted protein	Populus trichocarpa	354	365	3e-99	0.67	0.8	1	sp|Q15032	R3HD1_HUMAN R3H domain-containing protein 1	Homosapiens	1099	72	5e-12	0.35	0.53	1
37-H09	866	EEF38356.1	conserved hypothetical protein	Ricinus communis	331	472	e-131	0.92	0.96	3
37-H13	879	EEF38757.1	hypothetical protein RCOM_1407360	Ricinus communis	529	200	1e-49	0.5	0.59	2	sp|Q5KQI4	Y5814_ORYSJ B3 domain-containing protein Os05g0481400	Oryza sativa subsp. japonica	279	141	5e-33	0.47	0.61	2
37-I08	836	EEF52078.1	conserved hypothetical protein	Ricinus communis	559	82	6e-14	0.71	0.85	1	sp|Q8W206	CSN6A_ARATH COP9 signalosome complex subunit 6a	Arabidopsis thaliana	317	61.6	6e-09	0.87	0.93	3
37-I11	756	EEF39261.1	conserved hypothetical protein	Ricinus communis	188	324	6e-87	0.84	0.95	1	sp|O60175	OPI10_SCHPO Protein OPI10 homolog	Schizosaccharomycespombe	200	54.7	7e-07	0.26	0.42	1
37-J06	665	XP_002312798.1	predicted protein	Populus trichocarpa	740	268	2e-70	0.66	0.74	2	sp|Q8LPQ8	MSSP2_ARATH Monosaccharide-sensing protein 2	Arabidopsisthaliana	729	266	1e-70	0.65	0.72	2
37-J21	918	XP_002307426.1	predicted protein	Populus trichocarpa	287	326	2e-87	0.62	0.68	2	sp|Q6NRL0	PRXD1_XENLA Prolyl-tRNA synthetase associateddomain-containing protein 1	Xenopus laevi	168	76.3	3e-13	0.46	0.62	2
37-K12	745	XP_002306878.1	predicted protein	Populus trichocarpa	271	436	e-120	0.92	0.97	3	sp|Q54JC2	Y2881_DICDI Uncharacterized protein DDB_G0288155	Dictyostelium discoideum	246	185	2e-46	0.4	0.65	3
37-K16	897	XP_002312117.1	predicted protein	Populus trichocarpa	293	443	e-123	0.76	0.84	2	sp|Q3ZC12	EIF3G_BOVIN Eukaryotic translation initiation factor 3subunit G	Bos taurus	320	184	6e-46	0.4	0.54	2
37-K19	580	XP_002319415.1	predicted protein	Populus trichocarpa	417	113	9e-24	0.53	0.71	1	sp|O22932	CIPKB_ARATH CBL-interacting serine/threonine-proteinkinase 11	Arabidopsis thaliana	435	82.8	1e-15	0.43	0.58	1
37-K22	904	XP_002269873.1	PREDICTED: hypothetical protein	Vitis vinifera	711	478	e-133	0.83	0.91	2	sp|Q41382	RH7_SPIOL DEAD-box ATP-dependent RNA helicase 7	Spinaciaoleracea	685	434	e-121	0.76	0.85	2
37-L02	794	XP_002284849.1	PREDICTED: hypothetical protein	Vitis vinifera	530	445	e-136	0.91	0.96	1	sp|Q99LH1	NOG2_MOUSE Nucleolar GTP-binding protein 2	Musmusculus	728	317	9e-93	0.65	0.79	1
37-L19	803	EEF38069.1	conserved hypothetical protein	Ricinus communis	206	221	6e-56	0.6	0.71	2
37-L24	869	XP_002280827.1	PREDICTED: hypothetical protein	Vitis vinifera	361	404	e-111	0.79	0.91	2	sp|Q9HB07	MYG1_HUMAN UPF0160 protein MYG1, mitochondrial	Homosapiens	376	209	2e-53	0.46	0.64	2
37-M08	893	EEF51374.1	conserved hypothetical protein	Ricinus communis	302	279	2e-73	0.71	0.78	1	sp|Q93YV9	SKIP8_ARATH F-box protein SKIP8	Arabidopsis thalian	231	251	6e-66	0.74	0.8	1
37-M19	864	XP_002282657.1	PREDICTED: hypothetical protein	Vitis vinifera	888	442	e-122	0.77	0.87	2	sp|O64948	LONP2_ARATH Lon protease homolog 2, peroxisomal	Arabidopsis thaliana	888	422	e-117	0.74	0.83	2
37-M22	577	XP_002319007.1	predicted protein	Populus trichocarpa	488	116	1e-24	0.84	0.92	1
37-N08	924	XP_002270724.1	PREDICTED: hypothetical protein	Vitis vinifera	1011	456	e-126	0.77	0.81	2	sp|A4IG72	TGFA1_DANRE Transforming growth factor-betareceptor-associated protein 1 homolog	Danio reri	863	90.9	1e-17	0.27	0.41	2
37-O20	844	XP_002281756.1	PREDICTED: hypothetical protein	Vitis vinifera	301	355	2e-96	0.66	0.71	3	sp|Q16629	SRSF7_HUMAN Serine/arginine-rich splicing factor 7	Homo sapiens	238	97.8	8e-20	0.31	0.44	3
37-O21	871	XP_002326463.1	predicted protein	Populus trichocarpa	302	363	1e-98	0.69	0.74	2	sp|Q05466	HAT4_ARATH Homeobox-leucine zipper protein HAT4	Arabidopsis thaliana	284	281	4e-75	0.59	0.67	2
37-P06	477	CAO21682.1	unnamed protein product	Vitis vinifera	80	139	9e-32	0.78	0.9	1
38-A02	385	XP_002323311.1	predicted protein	Populus trichocarpa	66	95.5	2e-18	0.79	0.91	1
38-A09	701	XP_002279067.1	PREDICTED: hypothetical protein	Vitis vinifera	627	303	7e-81	0.68	0.82	3
38-A22	552	XP_002264820.1	PREDICTED: hypothetical protein	Vitis vinifera	812	82.8	1e-14	0.61	0.76	3
38-B10	876	CAO41059.1	unnamed protein product	Vitis vinifera	458	172	3e-41	0.47	0.63	1
38-B21	707	XP_002324349.1	predicted protein	Populus trichocarpa	490	240	1e-61	0.56	0.7	1	sp|Q3EBM5	ASPR1_ARATH Probable aspartic protease At2g35615	Arabidopsis thaliana	447	76.6	1e-13	0.28	0.45	1
38-C07	753	YP_001630301.1	hypothetical protein Bpet1693	Bordetella petrii DSM 12804	285	229	2e-58	0.82	0.92	-3	sp|O28142	SERB_ARCFU Phosphoserine phosphatase	Archaeoglobusfulgidus	344	119	3e-26	0.44	0.66	-3
38-C15	858	ABK94132.1	unknown	Populus trichocarpa	229	249	3e-64	0.62	0.73	3
38-C16	898	YP_259954.1	hypothetical protein PFL_2848	Pseudomonas fluorescens Pf-5	316	308	6e-82	0.71	0.79	2
38-C19	467	XP_002269177.1	PREDICTED: hypothetical protein	Vitis vinifera	539	87.8	3e-16	0.62	0.77	2
38-C21	432	EEF34510.1	conserved hypothetical protein	Ricinus communis	77	102	2e-20	0.62	0.71	1
38-C24	691	XP_002324028.1	predicted protein	Populus trichocarpa	428	243	5e-85	0.7	0.75	2	sp|Q9EPI1	XYLT1_RAT Xylosyltransferase 1 (Fragment)	Rattusnorvegicus	821	36.6	9e-06	0.54	0.72	3
38-D06	504	XP_002436529.1	hypothetical protein SORBIDRAFT_10g004260	Sorghum bicolor	667	196	7e-49	0.81	0.93	3	sp|O65202	ACOX1_ARATH Peroxisomal acyl-coenzyme A oxidase 1	Arabidopsis thaliana	664	180	3e-45	0.75	0.9	3
38-D10	610	XP_002313196.1	predicted protein	Populus trichocarpa	662	110	7e-23	0.52	0.67	2	sp|A0RQ71	SYD_CAMFF Aspartyl-tRNA synthetase	Campylobacter fetussubsp. fetus (strain 82-40)	584	58.9	2e-08	0.57	0.78	2
38-D11	909	XP_002332378.1	hypothetical protein POPTRDRAFT_746911	Populus trichocarpa	380	481	e-134	0.76	0.87	1	sp|Q9MAT5	ANM42_ARATH Probable protein arginine N-methyltransferase4.2	Arabidopsis thaliana	383	425	e-118	0.65	0.83	1
38-D19	833	XP_002268702.1	PREDICTED: hypothetical protein	Vitis vinifera	202	166	3e-39	0.49	0.61	2	sp|A7PTY8	U4976_VITVI UPF0497 membrane protein 6	Vitis vinifer	202	166	2e-40	0.49	0.61	2
38-E15	596	XP_002273386.1	PREDICTED: hypothetical protein	Vitis vinifera	118	162	2e-38	0.72	0.79	2
38-E17	846	YP_585902.1	hypothetical protein Rmet_3763	Ralstonia metallidurans CH34	112	121	1e-25	0.61	0.76	1
38-F03	788	XP_002285799.1	PREDICTED: hypothetical protein	Vitis vinifera	350	340	9e-92	0.76	0.87	1	sp|Q8LBV4	Y1814_ARATH Uncharacterized methyltransferase At1g78140,chloroplastic	Arabidopsis thaliana	355	330	9e-90	0.73	0.87	1
38-F06	856	XP_002319208.1	predicted protein	Populus trichocarpa	320	234	9e-94	0.81	0.92	1	sp|Q54YW1	ELMOA_DICDI ELMO domain-containing protein A	Dictyostelium discoideum	977	65.5	2e-17	0.3	0.48	1
38-F08	743	XP_002319912.1	predicted protein	Populus trichocarpa	376	263	2e-68	0.75	0.81	1	sp|B9I666	LISC1_POPTR Lipoyl synthase 1, chloroplastic	Populustrichocarpa	376	263	1e-69	0.75	0.81	1
38-F10	752	XP_002277249.1	PREDICTED: hypothetical protein	Vitis vinifera	371	452	e-125	0.93	0.95	1	sp|P05414	GOX_SPIOL Peroxisomal (S)-2-hydroxy-acid oxidase	Spinacia oleracea	369	445	e-124	0.9	0.94	1
38-F20	325	XP_002302505.1	predicted protein	Populus trichocarpa	152	75.5	2e-12	0.72	0.82	3	sp|Q76E23	IF4G1_ARATH Eukaryotic translation initiation factor 4G	Arabidopsis thaliana	1727	53.1	5e-07	0.54	0.66	3
38-F22	778	EEF28569.1	conserved hypothetical protein	Ricinus communis	363	274	8e-72	0.59	0.72	1
38-F24	910	XP_002308119.1	predicted protein	Populus trichocarpa	817	532	e-149	0.86	0.92	3	sp|O65351	SUBL_ARATH Subtilisin-like protease	Arabidopsisthaliana	757	109	2e-23	0.37	0.54	3
38-G16	822	AAL47004.1	AF448811_1 unknown	Davidia involucrata	226	247	1e-63	0.65	0.76	3	sp|Q09809	YAB9_SCHPO Uncharacterized membrane protein C2G11.09	Schizosaccharomyces pombe	796	63.2	2e-09	0.33	0.59	3
38-G22	832	XP_002270682.1	PREDICTED: hypothetical protein	Vitis vinifera	676	293	1e-77	0.63	0.74	3	sp|Q54XM6	ETFD_DICDI Electron transfer flavoprotein-ubiquinoneoxidoreductase, mitochondrial	Dictyosteliumdiscoideum	606	181	5e-45	0.54	0.72	3
38-H03	833	XP_002315516.1	predicted protein	Populus trichocarpa	480	386	e-105	0.69	0.75	2	sp|Q42384	PRL1_ARATH Protein pleiotropic regulatory locus 1	Arabidopsis thaliana	486	371	e-102	0.65	0.76	2
38-H19	821	EEF39072.1	conserved hypothetical protein	Ricinus communis	441	161	8e-38	0.46	0.56	1
38-H21	336	EEF31021.1	conserved hypothetical protein	Ricinus communis	57	117	5e-25	0.91	0.94	3
38-I03	684	XP_002277572.1	PREDICTED: similar to FIO1 (FIONA1)	Vitis vinifera	497	191	5e-47	0.85	0.91	3	sp|Q554C9	MET10_DICDI Putative methyltransferase METT10D homolog	Dictyostelium discoideum	568	93.6	1e-18	0.49	0.59	3
38-I14	364	EEF34675.1	conserved hypothetical protein	Ricinus communis	291	79	1e-13	0.7	0.76	3	sp|Q9CY21	WBS22_MOUSE Uncharacterized methyltransferase WBSCR22	Mus musculus	281	52.4	9e-07	0.52	0.6	3
38-J03	851	XP_002285470.1	PREDICTED: similar to Tubby; Cyclin-like F-box	Vitis vinifera	401	362	2e-98	0.82	0.91	1	sp|Q93VI8	TLP7_ARATH Tubby-like F-box protein 7	Arabidopsisthaliana	379	332	2e-90	0.74	0.86	1
38-J04	613	XP_002271945.1	PREDICTED: hypothetical protein	Vitis vinifera	713	184	4e-45	0.79	0.91	3
38-J06	734	XP_002280677.1	PREDICTED: hypothetical protein	Vitis vinifera	517	229	2e-58	0.57	0.71	1
38-J11	826	CAO41390.1	unnamed protein product	Vitis vinifera	374	125	2e-49	0.65	0.77	3	sp|O80871	P2C25_ARATH Probable protein phosphatase 2C 25	Arabidopsis thaliana	396	110	1e-42	0.63	0.73	3
38-J22	700	XP_002304552.1	predicted protein	Populus trichocarpa	412	331	4e-89	0.77	0.89	-2	sp|A7PZL3	PGLR_VITVI Probable polygalacturonase	Vitis vinifer	491	183	8e-46	0.43	0.65	-2
38-K08	858	XP_002328719.1	predicted protein	Populus trichocarpa	215	375	e-102	0.93	0.97	2	sp|O04486	RAA2A_ARATH Ras-related protein RABA2a	Arabidopsisthaliana	217	366	e-100	0.92	0.96	2
38-K12	523	XP_002281267.1	PREDICTED: hypothetical protein	Vitis vinifera	343	131	3e-29	0.6	0.75	2
38-K21	262	XP_002324565.1	predicted protein	Populus trichocarpa	513	112	1e-23	0.62	0.75	1
38-L02	642	XP_002272159.1	PREDICTED: hypothetical protein	Vitis vinifera	361	237	7e-61	0.8	0.83	3	sp|Q94AN4	AP2L1_ARATH AP2-like ethylene-responsive transcriptionfactor At1g16060	Arabidopsis thaliana	345	216	7e-56	0.71	0.79	3
38-L06	548	XP_002277309.1	PREDICTED: hypothetical protein	Vitis vinifera	1865	179	1e-43	0.59	0.74	1
38-L10	241	XP_002278599.1	PREDICTED: hypothetical protein	Vitis vinifera	279	109	8e-23	0.83	0.9	1
38-L12	909	XP_002272642.1	PREDICTED: hypothetical protein	Vitis vinifera	213	137	1e-30	0.38	0.53	1
38-L24	763	XP_002282109.1	PREDICTED: hypothetical protein	Vitis vinifera	1002	408	e-112	0.79	0.85	1	sp|Q6ZQ18	EFR3B_MOUSE Protein EFR3 homolog B	Mus musculu	817	74.3	8e-13	0.27	0.51	1
38-M01	863	XP_002306890.1	predicted protein	Populus trichocarpa	222	321	6e-86	0.71	0.83	1	sp|Q6ZRR5	TM136_HUMAN Transmembrane protein 136	Homo sapien	245	87.8	9e-17	0.28	0.49	1
38-M10	617	XP_002281005.1	PREDICTED: hypothetical protein	Vitis vinifera	1184	218	4e-55	0.65	0.73	1
38-M16	879	XP_002282924.1	PREDICTED: hypothetical protein isoform 2	Vitis vinifera	161	202	3e-50	0.61	0.67	2	sp|Q9SJM6	SAP4_ARATH Zinc finger A20 and AN1 domain-containingstress-associated protein 4	Arabidopsis thalian	161	198	5e-50	0.59	0.63	2
38-N03	877	XP_002329543.1	predicted protein	Populus trichocarpa	345	160	1e-37	0.53	0.59	3
38-N04	727	XP_002265167.1	PREDICTED: similar to 30S ribosomal protein S11, putative	Vitis vinifera	198	165	4e-39	0.52	0.67	3	sp|Q2YAX4	RS11_NITMU 30S ribosomal protein S11	Nitrosospiramultiformis (strain ATCC 25196 / NCIMB 11849)	129	77.4	9e-14	0.4	0.53	3
38-N09	935	XP_002326087.1	predicted protein	Populus trichocarpa	289	136	3e-30	0.93	1	1	sp|Q8LDW9	XTH9_ARATH Xyloglucan endotransglucosylase/hydrolaseprotein 9	Arabidopsis thaliana	290	120	1e-26	0.79	0.96	1
38-N14	691	EEF37668.1	conserved hypothetical protein	Ricinus communis	124	167	6e-40	0.68	0.78	3
38-N18	703	EEF49831.1	conserved hypothetical protein	Ricinus communis	343	309	1e-82	0.71	0.82	3
38-O17	645	XP_002304478.1	predicted protein	Populus trichocarpa	350	55.5	2e-10	0.67	0.86	3	sp|Q42605	GALE1_ARATH UDP-glucose 4-epimerase 1	Arabidopsisthaliana	351	50.8	6e-10	0.62	0.81	3
38-O23	457	XP_002276232.1	PREDICTED: hypothetical protein	Vitis vinifera	174	59.7	9e-08	0.41	0.54	2
38-O24	493	XP_002330393.1	predicted protein	Populus trichocarpa	99	103	7e-21	0.61	0.68	3
38-P17	750	XP_002327680.1	predicted protein	Populus trichocarpa	481	257	9e-67	0.64	0.75	1
38-P23	877	XP_002281957.1	PREDICTED: hypothetical protein	Vitis vinifera	319	332	4e-89	0.81	0.88	1
39-A15	651	EEF30934.1	conserved hypothetical protein	Ricinus communis	263	72	4e-11	0.36	0.51	2
39-B01	872	XP_002310919.1	predicted protein	Populus trichocarpa	303	540	e-152	0.96	0.98	3	sp|Q9SX52	FYPP1_ARATH Phytochrome-associated serine/threonineprotein phosphatase 1	Arabidopsis thaliana	303	540	e-153	0.95	0.98	3
39-B02	439	XP_002271887.1	PREDICTED: hypothetical protein	Vitis vinifera	460	93.6	6e-18	0.93	1	1	sp|Q9LX65	VATH_ARATH V-type proton ATPase subunit H	Arabidopsisthaliana	441	87	4e-17	0.87	0.95	1
39-B12	962	XP_002270400.1	PREDICTED: hypothetical protein	Vitis vinifera	510	561	e-158	0.91	0.96	3	sp|P22200	KPYC_SOLTU Pyruvate kinase, cytosolic isozyme	Solanumtuberosum	510	551	e-156	0.89	0.95	3
39-B16	214	XP_002274991.1	PREDICTED: hypothetical protein	Vitis vinifera	677	62.4	1e-08	0.76	0.84	-1
39-B23	828	EEF35434.1	conserved hypothetical protein	Ricinus communis	582	306	1e-81	0.59	0.71	3	sp|Q8GUM4	Y3739_ARATH Uncharacterized membrane protein At3g27390	Arabidopsis thaliana	588	289	1e-77	0.58	0.69	3
39-C04	628	XP_002326694.1	predicted protein	Populus trichocarpa	157	194	4e-48	0.65	0.69	1
39-C17	896	EEF50274.1	hypothetical protein RCOM_1608690	Ricinus communis	638	102	5e-20	0.33	0.45	2
39-E11	740	XP_002285748.1	PREDICTED: hypothetical protein	Vitis vinifera	387	268	5e-70	0.62	0.72	1	sp|Q9SK86	ADHL1_ARATH Alcohol dehydrogenase-like 1	Arabidopsisthaliana	388	241	4e-63	0.56	0.68	1
39-E17	607	XP_002320580.1	predicted protein	Populus trichocarpa	401	265	2e-69	0.73	0.8	2	sp|Q9XG98	KPRS1_SPIOL Ribose-phosphate pyrophosphokinase 1	Spinacia oleracea	336	237	5e-62	0.9	0.97	2
39-F09	740	CAO70534.1	unnamed protein product	Vitis vinifera	640	50.8	4e-13	0.35	0.53	3
39-F18	690	XP_002304440.1	predicted protein	Populus trichocarpa	285	308	2e-82	0.78	0.86	2	sp|Q55D54	ER25B_DICDI Putative C-4 methylsterol oxidaseDDB_G0269788	Dictyostelium discoideum	270	105	4e-22	0.32	0.51	2
39-F21	832	XP_002299215.1	predicted protein	Populus trichocarpa	312	252	3e-65	0.51	0.64	3	sp|Q9ZVJ6	ANXD4_ARATH Annexin D4	Arabidopsis thaliana	319	206	1e-52	0.42	0.6	3
39-G05	887	XP_002269412.1	PREDICTED: hypothetical protein	Vitis vinifera	1714	367	e-100	0.67	0.74	1
39-G09	654	CAO61388.1	unnamed protein product	Vitis vinifera	1045	244	3e-63	0.72	0.8	1
39-G11	444	XP_002299648.1	predicted protein	Populus trichocarpa	249	286	6e-76	0.93	0.97	3	sp|O23715	PSA3_ARATH Proteasome subunit alpha type-3	Arabidopsisthaliana	249	279	5e-75	0.9	0.95	3
39-H03	611	XP_002274754.1	PREDICTED: hypothetical protein	Vitis vinifera	313	405	e-111	0.94	0.96	3	sp|Q8VE80	THOC3_MOUSE THO complex subunit 3	Mus musculu	351	211	4e-54	0.5	0.66	3
39-H05	604	YP_787395.1	hypothetical protein BAV2899	Bordetella avium 197N	103	134	7e-30	0.94	0.98	2
39-H13	762	EEF42203.1	conserved hypothetical protein	Ricinus communis	401	276	1e-72	0.6	0.73	2
39-H15	539	XP_002299935.1	predicted protein	Populus trichocarpa	814	202	9e-51	0.61	0.73	3	sp|Q84TI3	OBE4_ARATH Protein OBERON 4	Arabidopsis thalian	975	156	8e-38	0.56	0.69	3
39-I01	316	YP_259532.1	hypothetical protein PFL_2425	Pseudomonas fluorescens Pf-5	164	208	1e-52	0.92	0.97	-1
39-I09	511	XP_002312697.1	predicted protein	Populus trichocarpa	563	171	2e-41	0.69	0.77	2	sp|Q9T041	MAPT_ARATH Microtubule-associated protein TORTIFOLIA1	Arabidopsis thaliana	864	86.7	7e-17	0.34	0.59	2
39-I12	759	XP_002274567.1	PREDICTED: hypothetical protein	Vitis vinifera	260	317	1e-84	0.74	0.83	3	sp|Q55EX9	Y8948_DICDI Putative methyltransferase DDB_G0268948	Dictyostelium discoideum	263	77.4	1e-13	0.29	0.47	3
39-I15	368	XP_002317478.1	predicted protein	Populus trichocarpa	73	74.7	3e-12	0.49	0.58	3
39-I18	371	XP_002304143.1	predicted protein	Populus trichocarpa	453	81.3	3e-14	0.53	0.62	3
39-J05	899	XP_002322302.1	predicted protein	Populus trichocarpa	601	506	e-141	0.85	0.93	3	sp|Q8BMA6	SRP68_MOUSE Signal recognition particle 68 kDa protein	Mus musculus	625	142	3e-33	0.31	0.53	3
39-J17	650	EEF38510.1	conserved hypothetical protein	Ricinus communis	394	311	3e-83	0.74	0.86	2
39-J22	722	XP_002317224.1	predicted protein	Populus trichocarpa	309	373	e-102	0.75	0.83	2	sp|P34914	HYES_MOUSE Epoxide hydrolase 2	Mus musculus	554	116	2e-25	0.33	0.49	2
39-K06	830	XP_002313422.1	predicted protein	Populus trichocarpa	275	265	3e-69	0.67	0.72	2	sp|Q9M2S6	SDIR1_ARATH E3 ubiquitin-protein ligase SDIR1	Arabidopsis thaliana	273	229	2e-59	0.67	0.75	2
39-K12	698	XP_002310335.1	predicted protein	Populus trichocarpa	184	153	2e-35	0.53	0.58	3
39-K22	864	XP_002277580.1	PREDICTED: hypothetical protein	Vitis vinifera	339	107	1e-21	0.65	0.78	1
39-L07	911	XP_002270850.1	PREDICTED: hypothetical protein	Vitis vinifera	533	452	e-125	0.73	0.79	1
39-L09	456	YP_001631787.1	hypothetical protein Bpet3177	Bordetella petrii DSM 12804	81	120	3e-26	0.88	0.95	2	sp|P0AD40	YPEB_ECOLI Uncharacterized protein ypeB	Escherichiacoli (strain K12)	72	57.8	3e-08	0.46	0.59	2
39-M04	723	XP_002315896.1	predicted protein	Populus trichocarpa	400	150	8e-35	0.55	0.66	1
39-M10	724	XP_002303025.1	predicted protein	Populus trichocarpa	327	250	1e-64	0.56	0.72	1	sp|Q9M158	Y4105_ARATH Uncharacterized protein At4g01050,chloroplastic	Arabidopsis thaliana	466	97.1	1e-19	0.37	0.52	1
39-M13	845	XP_002303655.1	predicted protein	Populus trichocarpa	364	374	e-102	0.74	0.86	2	sp|Q680C0	GDL62_ARATH GDSL esterase/lipase At4g10955	Arabidopsisthaliana	350	321	3e-87	0.63	0.79	2
39-M19	253	XP_002396864.1	hypothetical protein MPER_02817	Moniliophthora perniciosa FA553	140	120	4e-26	0.92	0.96	3
39-N03	878	XP_002265120.1	PREDICTED: hypothetical protein	Vitis vinifera	252	343	1e-92	0.71	0.83	2
39-N06	477	XP_002278581.1	PREDICTED: hypothetical protein	Vitis vinifera	137	91.3	3e-17	0.93	0.97	-1	sp|Q9SS17	RS241_ARATH 40S ribosomal protein S24-1	Arabidopsisthaliana	133	88.2	2e-17	0.89	0.97	-1
39-O04	755	XP_002320677.1	predicted protein	Populus trichocarpa	113	75.9	4e-12	0.68	0.75	1
39-O19	613	CAO23745.1	unnamed protein product	Vitis vinifera	486	268	2e-70	0.72	0.82	3
39-P09	558	CAO62990.1	unnamed protein product	Vitis vinifera	1471	142	3e-39	0.82	0.87	2	sp|Q08047	GLGB_MAIZE 1,4-alpha-glucan-branching enzyme 2,chloroplastic/amyloplastic	Zea mays	799	103	7e-22	0.75	0.85	3
39-P13	595	XP_002284455.1	PREDICTED: hypothetical protein	Vitis vinifera	146	194	6e-48	0.69	0.73	1	sp|P51414	RL261_ARATH 60S ribosomal protein L26-1	Arabidopsisthaliana	146	182	2e-45	0.64	0.71	1
40-A05	726	XP_002282636.1	PREDICTED: hypothetical protein	Vitis vinifera	362	85.9	3e-15	0.65	0.77	1	sp|Q38899	ORC2_ARATH Origin recognition complex subunit 2	Arabidopsis thaliana	363	83.6	1e-15	0.67	0.85	1
40-B02	294	XP_002268972.1	PREDICTED: similar to EBS1 (EMS-MUTAGENIZED BRI1 SUPPRESSOR 1);UDP-glucose:glycoprotein glucosyltransferase/transferase, transferring glycosyl groups / transferase,transferring hexosyl groups	Vitis vinifera	1611	201	2e-50	0.92	0.98	1	sp|Q8T191	UGGG_DICDI Probable UDP-glucose:glycoproteinglucosyltransferase A	Dictyostelium discoideum	1681	160	2e-39	0.72	0.86	1
40-B04	662	EEF34184.1	conserved hypothetical protein	Ricinus communis	683	297	5e-79	0.72	0.78	3
40-B12	634	XP_002262981.1	PREDICTED: hypothetical protein	Vitis vinifera	336	205	3e-51	0.74	0.8	2	sp|Q5F389	WWOX_CHICK WW domain-containing oxidoreductase	Gallusgallus	414	83.2	1e-15	0.41	0.64	2
40-B13	574	XP_002299622.1	predicted protein	Populus trichocarpa	394	343	7e-93	0.75	0.82	1	sp|O33822	AAT_THEAQ Aspartate aminotransferase	Thermus aquaticu	383	83.6	8e-16	0.29	0.5	1
40-C06	642	XP_002274799.1	PREDICTED: similar to cation chloride cotransporter	Vitis vinifera	982	328	2e-88	0.77	0.83	2	sp|Q09573	KCC3_CAEEL Sodium/chloride cotransporter 3	Caenorhabditis elegans	1020	70.9	7e-12	0.3	0.62	2
40-C11	592	XP_002311013.1	predicted protein	Populus trichocarpa	218	191	3e-47	0.86	0.94	1	sp|Q0J709	UP12_ORYSJ Unknown protein DS12 from 2D-PAGE of leaf,chloroplastic	Oryza sativa subsp. japonic	283	127	7e-29	0.42	0.61	1
40-G02	716	XP_002282272.1	PREDICTED: similar to beta-1,3-glucanase 1	Vitis vinifera	394	213	1e-53	0.71	0.77	1	sp|Q9M069	E137_ARATH Glucan endo-1,3-beta-glucosidase 7	Arabidopsis thaliana	504	137	5e-32	0.59	0.75	1
40-G07	704	XP_002304833.1	predicted protein	Populus trichocarpa	319	401	e-110	0.81	0.89	3	sp|Q40784	AAPC_CENCI Putative glucose-6-phosphate 1-epimerase	Cenchrus ciliaris	329	343	6e-94	0.72	0.84	3
40-H08	220	XP_002276434.1	PREDICTED: hypothetical protein	Vitis vinifera	567	135	1e-30	0.83	0.93	3
40-H10	866	XP_002285001.1	PREDICTED: hypothetical protein	Vitis vinifera	372	266	2e-69	0.74	0.89	1	sp|P42753	CCD31_ARATH Cyclin-D3-1	Arabidopsis thalian	376	197	6e-50	0.58	0.79	1
40-H11	394	XP_002269948.1	PREDICTED: hypothetical protein	Vitis vinifera	396	119	8e-26	0.44	0.55	1
40-H14	671	XP_002283965.1	PREDICTED: hypothetical protein isoform 1	Vitis vinifera	445	374	e-102	0.8	0.88	3	sp|Q94B55	XB31_ARATH Putative E3 ubiquitin-protein ligase XBAT31	Arabidopsis thaliana	456	361	3e-99	0.78	0.86	3
40-H16	762	XP_002274007.1	PREDICTED: hypothetical protein	Vitis vinifera	954	261	6e-68	0.63	0.72	3	sp|Q0WPH8	NEK5_ARATH Serine/threonine-protein kinase Nek5	Arabidopsis thaliana	956	211	4e-54	0.51	0.67	3
40-H24	489	XP_002275015.1	PREDICTED: hypothetical protein isoform 1	Vitis vinifera	372	273	5e-72	0.83	0.89	2	sp|P29790	ATPG_TOBAC ATP synthase gamma chain, chloroplastic	Nicotiana tabacum	377	268	2e-71	0.81	0.89	2
40-I10	693	XP_002269143.1	PREDICTED: hypothetical protein	Vitis vinifera	960	382	e-104	0.8	0.89	2	sp|O65202	ACOX1_ARATH Peroxisomal acyl-coenzyme A oxidase 1	Arabidopsis thaliana	664	372	e-103	0.78	0.88	2
40-I17	400	EEF33735.1	conserved hypothetical protein	Ricinus communis	449	173	5e-42	0.79	0.85	2
40-J05	880	XP_002298549.1	predicted protein	Populus trichocarpa	351	408	e-112	0.87	0.91	-1	sp|Q2MHE4	HT1_ARATH Serine/threonine-protein kinase HT1	Arabidopsis thaliana	390	141	7e-33	0.45	0.6	-1
40-J17	852	XP_002282021.1	PREDICTED: hypothetical protein isoform 1	Vitis vinifera	272	448	e-124	0.91	0.96	1	sp|Q54JC2	Y2881_DICDI Uncharacterized protein DDB_G0288155	Dictyostelium discoideum	246	186	2e-46	0.42	0.64	1
40-K01	914	XP_002272342.1	PREDICTED: hypothetical protein	Vitis vinifera	720	283	e-110	0.72	0.79	3	sp|O74326	CID11_SCHPO Poly(A) RNA polymerase cid11	Schizosaccharomyces pombe	478	103	2e-26	0.41	0.65	3
40-K12	922	XP_002321901.1	predicted protein	Populus trichocarpa	474	290	2e-76	0.51	0.6	3
40-K21	837	XP_002277309.1	PREDICTED: hypothetical protein	Vitis vinifera	1865	213	2e-53	0.45	0.55	3
40-L09	702	ABB29927.1	unknown	Solanum tuberosum	122	218	3e-55	0.92	0.97	2	sp|Q9M5L0	RL35_EUPES 60S ribosomal protein L35	Euphorbia esul	123	210	6e-54	0.91	0.94	2
40-L13	729	ABK94300.1	unknown	Populus trichocarpa	149	203	1e-50	0.65	0.79	1	sp|Q0JBH9	ERG3_ORYSJ Elicitor-responsive protein 3	Oryza sativasubsp. japonica	144	188	4e-47	0.62	0.76	1
40-L15	771	XP_002330273.1	predicted protein	Populus trichocarpa	231	228	4e-58	0.57	0.7	2
40-L18	843	EEF44807.1	conserved hypothetical protein	Ricinus communis	285	345	3e-93	0.7	0.77	1
40-M04	712	CAN72170.1	hypothetical protein	Vitis vinifera	920	150	8e-35	0.65	0.79	3	sp|Q9STX1	ACBP3_ARATH Acyl-CoA-binding domain-containing protein 3	Arabidopsis thaliana	362	126	1e-28	0.48	0.65	3
40-M10	434	XP_002324808.1	predicted protein	Populus trichocarpa	540	78.2	3e-13	0.53	0.69	2	sp|Q9LYD9	EMF1_ARATH Protein EMBRYONIC FLOWER 1	Arabidopsisthaliana	1096	50.4	4e-06	0.6	0.77	2
40-M22	848	XP_002263553.1	PREDICTED: hypothetical protein	Vitis vinifera	949	337	1e-90	0.63	0.82	1	sp|O04036	ERD6_ARATH Sugar transporter ERD6	Arabidopsis thalian	496	296	2e-79	0.52	0.67	1
40-N03	846	XP_002276237.1	PREDICTED: hypothetical protein	Vitis vinifera	1156	472	e-131	0.83	0.89	2	sp|Q05609	CTR1_ARATH Serine/threonine-protein kinase CTR1	Arabidopsis thaliana	821	150	8e-36	0.44	0.61	2
40-N08	857	XP_002319324.1	predicted protein	Populus trichocarpa	171	118	6e-25	0.49	0.57	3	sp|Q9SN27	ATL59_ARATH E3 ubiquitin-protein ligase ATL59	Arabidopsis thaliana	225	76.6	2e-13	0.35	0.49	3
40-O24	497	XP_002305407.1	predicted protein	Populus trichocarpa	54	102	1e-20	0.85	0.94	1	sp|Q9XIA7	TOM6_ARATH Mitochondrial import receptor subunit TOM6homolog	Arabidopsis thaliana	54	89	1e-17	0.7	0.83	1
40-P02	635	XP_002273207.1	PREDICTED: hypothetical protein	Vitis vinifera	767	229	1e-58	0.95	0.98	2	sp|P31414	AVP1_ARATH Pyrophosphate-energized vacuolar membrane protonpump 1	Arabidopsis thaliana	770	220	7e-57	0.91	0.97	2
40-P15	570	XP_002266781.1	PREDICTED: hypothetical protein	Vitis vinifera	127	219	8e-56	0.85	0.94	3
40-P17	760	XP_002283391.1	PREDICTED: hypothetical protein	Vitis vinifera	417	312	2e-83	0.69	0.78	1
41-A02	769	XP_002330175.1	predicted protein	Populus trichocarpa	181	347	5e-94	0.93	0.98	2	sp|Q86KL4	MCTS1_DICDI Malignant T cell-amplified sequence 1 homolog	Dictyostelium discoideum	182	214	5e-55	0.56	0.73	2
41-B09	856	CAN76587.1	hypothetical protein	Vitis vinifera	736	548	e-154	0.89	0.97	3	sp|P28668	SYEP_DROME Bifunctional aminoacyl-tRNA synthetase	Drosophila melanogaster	1714	325	2e-88	0.53	0.7	3
41-B16	801	XP_002285710.1	PREDICTED: hypothetical protein	Vitis vinifera	558	381	e-104	0.82	0.91	3
41-B21	590	XP_002325051.1	predicted protein	Populus trichocarpa	88	155	3e-36	0.96	0.98	1	sp|Q9SUM2	RUXF_ARATH Probable small nuclear ribonucleoprotein F	Arabidopsis thaliana	88	152	2e-36	0.94	0.97	1
41-C06	255	ACN39809.1	unknown	Picea sitchensis	148	84.7	3e-15	0.97	1	2	sp|P35135	UBC4_SOLLC Ubiquitin-conjugating enzyme E2-17 kDa	Solanum lycopersicum	148	83.6	4e-16	0.94	1	2
41-C17	752	ABD96862.1	hypothetical protein	Cleome spinosa	427	266	1e-69	0.78	0.88	-2
41-D03	335	XP_002306471.1	predicted protein	Populus trichocarpa	134	78.2	3e-13	0.46	0.56	2
41-D04	624	EEF49964.1	conserved hypothetical protein	Ricinus communis	972	262	2e-68	0.64	0.76	1
41-D12	844	ABK94932.1	unknown	Populus trichocarpa	408	313	1e-83	0.61	0.65	1	sp|P42731	PABP2_ARATH Polyadenylate-binding protein 2	Arabidopsisthaliana	629	223	1e-57	0.47	0.57	1
41-E12	510	XP_002302351.1	predicted protein	Populus trichocarpa	366	232	9e-60	0.71	0.79	2	sp|Q38827	IAA9_ARATH Auxin-responsive protein IAA9	Arabidopsisthaliana	338	126	6e-29	0.62	0.74	2
41-E19	788	XP_002302476.1	predicted protein	Populus trichocarpa	246	305	3e-81	0.77	0.86	1	sp|Q93VG8	U326_ARATH UPF0326 protein At4g17486	Arabidopsisthaliana	224	219	2e-56	0.58	0.76	1
41-F03	372	XP_002268410.1	PREDICTED: hypothetical protein	Vitis vinifera	268	208	1e-52	0.74	0.84	1	sp|Q9CR50	ZN363_MOUSE RING finger and CHY zinc fingerdomain-containing protein 1	Mus musculus	261	128	1e-29	0.45	0.62	1
41-F05	913	XP_002300311.1	predicted protein	Populus trichocarpa	683	478	e-133	0.86	0.93	2	sp|Q01899	HSP7M_PHAVU Heat shock 70 kDa protein, mitochondrial	Phaseolus vulgaris	675	466	e-130	0.87	0.93	2
41-F06	257	XP_002318887.1	predicted protein	Populus trichocarpa	406	65.5	2e-09	0.6	0.78	-1
41-F09	776	XP_002298116.1	predicted protein	Populus trichocarpa	350	462	e-128	0.9	0.94	3	sp|Q5XIG8	STRAP_RAT Serine-threonine kinase receptor-associatedprotein	Rattus norvegicus	350	228	3e-59	0.47	0.66	3
41-F14	844	XP_002278571.1	PREDICTED: hypothetical protein	Vitis vinifera	572	343	9e-93	0.75	0.87	2	sp|Q8L7M4	SDN5_ARATH Small RNA degrading nuclease 5	Arabidopsisthaliana	567	281	3e-75	0.63	0.77	2
41-F19	890	EEF48128.1	conserved hypothetical protein	Ricinus communis	197	293	1e-77	0.7	0.81	2
41-G01	299	XP_002324890.1	predicted protein	Populus trichocarpa	426	125	1e-27	0.95	0.96	-1	sp|O04136	KNAP3_MALDO Homeobox protein knotted-1-like 3	Malusdomestica	427	125	6e-29	0.95	0.96	-1
41-H15	525	XP_002304351.1	predicted protein	Populus trichocarpa	261	252	1e-65	0.88	0.95	2	sp|P93654	SYP22_ARATH Syntaxin-22	Arabidopsis thaliana	268	223	5e-58	0.77	0.89	2
41-H17	881	XP_002282892.1	PREDICTED: hypothetical protein	Vitis vinifera	734	244	6e-63	0.46	0.63	1
41-I09	367	XP_002332589.1	predicted protein	Populus trichocarpa	648	106	9e-22	0.77	0.81	3	sp|P24629	HSP71_SOLLC Heat shock cognate 70 kDa protein 1	Solanum lycopersicum	650	98.6	1e-20	0.71	0.75	3
41-I13	833	XP_002306607.1	predicted protein	Populus trichocarpa	548	119	5e-25	0.38	0.47	3	sp|Q39008	M3K1_ARATH Mitogen-activated protein kinase kinase kinase1	Arabidopsis thaliana	608	68.6	5e-11	0.3	0.43	3
41-J07	627	EEF37047.1	conserved hypothetical protein	Ricinus communis	146	213	1e-53	0.72	0.82	1
41-J10	716	CAO22119.1	unnamed protein product	Vitis vinifera	211	324	5e-87	0.93	0.95	3	sp|P26357	TBP_SOLTU TATA-box-binding protein	Solanum tuberosu	200	323	5e-88	0.98	0.99	3
41-J14	754	EEF30735.1	conserved hypothetical protein	Ricinus communis	189	236	1e-60	0.64	0.73	1	sp|Q8TQR1	DNAJ_METAC Chaperone protein dnaJ	Methanosarcinaacetivorans	382	51.6	6e-06	0.37	0.47	1
41-J17	643	XP_002301325.1	predicted protein	Populus trichocarpa	235	306	1e-81	0.89	0.94	2	sp|O80845	PX11D_ARATH Peroxisomal membrane protein 11D	Arabidopsis thaliana	236	300	5e-81	0.84	0.93	2
41-J20	552	YP_002554561.1	protein of unknown function DUF323	Diaphorobacter sp. TPSY	348	216	7e-55	0.7	0.8	-1	sp|Q7AJA5	PKN1_CHLPN Serine/threonine-protein kinase pkn1	Chlamydia pneumoniae	619	84	6e-16	0.44	0.56	-1
41-J21	683	XP_002275593.1	PREDICTED: hypothetical protein	Vitis vinifera	529	120	1e-25	0.87	0.9	2	sp|Q96321	IMA1_ARATH Importin subunit alpha-1	Arabidopsisthaliana	532	115	3e-25	0.85	0.89	2
41-J23	539	XP_002283858.1	PREDICTED: hypothetical protein	Vitis vinifera	602	199	1e-49	0.63	0.68	1	sp|P39736	BX42_DROME Puff-specific protein Bx42	Drosophilamelanogaster	547	108	2e-23	0.37	0.5	1
41-K01	706	XP_002330242.1	predicted protein	Populus trichocarpa	160	234	5e-60	0.7	0.82	3	sp|Q5F3Z5	DNJB6_CHICK DnaJ homolog subfamily B member 6	Gallusgallus	326	80.5	1e-14	0.37	0.52	3
41-K08	812	EEF39980.1	conserved hypothetical protein	Ricinus communis	710	199	2e-49	0.84	0.93	2
41-K11	678	XP_002307140.1	predicted protein	Populus trichocarpa	1184	119	2e-25	0.63	0.8	1	sp|Q8L899	BRI1_SOLPE Systemin receptor SR160	Solanum peruvianu	1207	94	8e-19	0.44	0.64	1
41-K18	902	CAN65334.1	hypothetical protein	Vitis vinifera	554	147	2e-33	0.74	0.85	1	sp|Q9LR47	IP5P3_ARATH Type I inositol-1,4,5-trisphosphate5-phosphatase CVP2	Arabidopsis thaliana	617	99	4e-20	0.44	0.66	1
41-K23	558	XP_002315014.1	predicted protein	Populus trichocarpa	561	105	2e-21	0.94	0.98	1
41-K24	778	ACJ83975.1	unknown	Medicago truncatula	153	225	3e-57	0.73	0.84	2	sp|Q9ZNV9	AHP1_ARATH Histidine-containing phosphotransfer protein 1	Arabidopsis thaliana	154	214	7e-55	0.67	0.81	2
41-L12	813	XP_002332719.1	predicted protein	Populus trichocarpa	351	139	3e-31	0.85	0.92	2	sp|O04300	UPTG_PEA Alpha-1,4-glucan-protein synthase [UDP-forming]	Pisum sativum	364	65.1	6e-10	0.4	0.69	2
41-L16	854	XP_002323210.1	predicted protein	Populus trichocarpa	308	408	e-112	0.8	0.9	2	sp|Q8LPN7	RNG1L_ARATH E3 ubiquitin-protein ligase RING1-like	Arabidopsis thaliana	328	143	1e-33	0.36	0.52	2
41-M04	831	XP_002309065.1	predicted protein	Populus trichocarpa	305	379	e-103	0.72	0.76	3
41-M09	934	XP_002265304.1	PREDICTED: hypothetical protein	Vitis vinifera	1419	125	8e-27	0.31	0.49	1
41-M22	714	XP_002274515.1	PREDICTED: hypothetical protein	Vitis vinifera	944	63.9	1e-08	0.35	0.64	3
41-M24	616	CAN65241.1	hypothetical protein	Vitis vinifera	562	119	1e-35	0.62	0.68	1
41-N10	859	EEF32399.1	conserved hypothetical protein	Ricinus communis	409	444	e-123	0.78	0.85	2	sp|A8K979	ERI2_HUMAN ERI1 exoribonuclease 2	Homo sapiens	691	128	4e-29	0.43	0.63	2
41-O01	884	XP_002310313.1	predicted protein	Populus trichocarpa	473	518	e-145	0.85	0.89	2	sp|Q8VYN6	K6PF5_ARATH 6-phosphofructokinase 5, chloroplastic	Arabidopsis thaliana	537	505	e-142	0.84	0.89	2
41-P04	768	XP_002271656.1	PREDICTED: hypothetical protein	Vitis vinifera	437	427	e-118	0.91	0.92	1	sp|Q39097	ERF1X_ARATH Eukaryotic peptide chain release factorsubunit 1-1	Arabidopsis thaliana	436	410	e-114	0.87	0.9	1
41-P06	668	XP_002298511.1	predicted protein	Populus trichocarpa	543	150	4e-52	0.83	0.9	3	sp|Q96PB1	CASD1_HUMAN CAS1 domain-containing protein 1	Homosapiens	797	43.9	1e-10	0.46	0.63	2
41-P16	424	XP_002270639.1	PREDICTED: hypothetical protein isoform 1	Vitis vinifera	97	95.1	2e-18	0.57	0.59	1	sp|P32292	ARG2_VIGRR Indole-3-acetic acid-induced protein ARG2	Vigna radiata var. radiata	99	84	3e-16	0.5	0.6	1
42-A02	881	ABK92518.1	unknown	Populus trichocarpa	165	75.1	8e-12	0.61	0.79	1
42-A16	545	XP_002323855.1	predicted protein	Populus trichocarpa	96	98.6	3e-19	0.56	0.56	2	sp|Q9SB61	Y4466_ARATH ZF-HD homeobox protein At4g24660	Arabidopsis thaliana	220	57.8	4e-08	0.49	0.56	2
42-A24	359	XP_002285235.1	PREDICTED: hypothetical protein	Vitis vinifera	91	108	2e-22	0.58	0.69	2
42-B01	841	EEF52742.1	conserved hypothetical protein	Ricinus communis	1005	280	9e-74	0.54	0.64	3
42-B08	851	XP_002271043.1	PREDICTED: hypothetical protein	Vitis vinifera	457	375	e-102	0.7	0.81	3	sp|Q9C9J0	LHTL5_ARATH Lysine histidine transporter-like 5	Arabidopsis thaliana	448	107	1e-22	0.29	0.5	3
42-B10	807	XP_002325850.1	predicted protein	Populus trichocarpa	274	301	4e-80	0.77	0.88	1
42-B20	754	XP_002278624.1	PREDICTED: hypothetical protein	Vitis vinifera	362	415	e-114	0.79	0.87	1	sp|Q8RWQ9	ALEUL_ARATH Thiol protease aleurain-like	Arabidopsisthaliana	358	394	e-109	0.74	0.86	1
42-C08	860	XP_002284053.1	PREDICTED: hypothetical protein	Vitis vinifera	322	419	e-115	0.81	0.87	1	sp|P26360	ATPG3_IPOBA ATP synthase subunit gamma, mitochondrial	Ipomoea batatas	326	397	e-110	0.77	0.85	1
42-C16	897	XP_002331892.1	predicted protein	Populus trichocarpa	614	221	6e-56	0.53	0.64	1	sp|Q6C315	ATG13_YARLI Autophagy-related protein 13	Yarrowialipolytica	715	58.5	6e-08	0.24	0.4	1
42-C18	311	XP_002285836.1	PREDICTED: hypothetical protein	Vitis vinifera	464	85.1	2e-15	0.9	0.95	1	sp|Q8L883	LAX5_MEDTR Auxin transporter-like protein 5	Medicagotruncatula	490	79.7	5e-15	0.89	0.97	1
42-D01	577	XP_002312128.1	predicted protein	Populus trichocarpa	187	218	3e-55	0.6	0.7	2	sp|P13240	DR206_PEA Disease resistance response protein 206	Pisum sativum	184	69.7	1e-11	0.28	0.5	2
42-D06	886	EEF44197.1	conserved hypothetical protein	Ricinus communis	518	542	e-152	0.88	0.94	1	sp|Q8W486	Y1491_ARATH DUF246 domain-containing protein At1g04910	Arabidopsis thaliana	519	534	e-151	0.87	0.93	1
42-D07	810	XP_002308899.1	hypothetical protein POPTRDRAFT_416706	Populus trichocarpa	373	266	2e-69	0.61	0.69	2	sp|Q9FLE8	Y5986_ARATH Uncharacterized protein At5g39865	Arabidopsis thaliana	390	171	7e-42	0.52	0.66	2
42-D13	842	XP_002302382.1	predicted protein	Populus trichocarpa	701	217	1e-54	0.7	0.79	2	sp|Q9ZQB9	CSLCC_ARATH Probable xyloglucan glycosyltransferase 12	Arabidopsis thaliana	699	181	4e-45	0.6	0.72	2
42-E08	424	XP_002274777.1	PREDICTED: hypothetical protein	Vitis vinifera	267	135	2e-30	0.83	0.84	1	sp|P35685	RL7A_ORYSJ 60S ribosomal protein L7a	Oryza sativasubsp. japonica	258	131	2e-30	0.78	0.84	1
42-E12	681	XP_002304710.1	predicted protein	Populus trichocarpa	372	130	1e-28	0.71	0.8	1
42-E18	493	ABD32680.1	hypothetical protein MtrDRAFT_AC150442g12v2	Medicago truncatula	460	127	4e-28	0.7	0.85	1
42-E21	631	XP_002308646.1	predicted protein	Populus trichocarpa	122	179	1e-43	0.72	0.82	2	sp|P48502	QCR7_SOLTU Cytochrome b-c1 complex subunit 7	Solanumtuberosum	123	164	6e-40	0.69	0.8	2
42-F08	902	EEF39078.1	conserved hypothetical protein	Ricinus communis	270	298	4e-79	0.81	0.9	1
42-F17	854	EEF36325.1	protein with unknown function	Ricinus communis	211	409	e-112	0.95	0.97	3	sp|P49104	RAB2B_MAIZE Ras-related protein Rab-2-B	Zea may	210	358	2e-98	0.84	0.9	3
42-G12	772	ABX71678.1	hypothetical protein LBL11	Panax quinquefolius	117	207	7e-52	0.9	0.94	1	sp|Q9ZWQ7	DAD1_CITUN Defender against cell death 1	Citrus unshi	115	207	5e-53	0.92	0.96	1
42-G14	891	XP_002311694.1	predicted protein	Populus trichocarpa	524	458	e-127	0.84	0.91	1	sp|O22785	PR19B_ARATH Pre-mRNA-processing factor 19 homolog 2	Arabidopsis thaliana	525	427	e-119	0.78	0.87	1
42-G18	669	XP_002268405.1	PREDICTED: hypothetical protein	Vitis vinifera	115	202	2e-50	0.9	0.97	2	sp|Q9CQJ8	NDUB9_MOUSE NADH dehydrogenase [ubiquinone] 1 betasubcomplex subunit 9	Mus musculus	179	59.7	2e-08	0.33	0.6	2
42-G20	905	XP_002282119.1	PREDICTED: similar to polyubiquitin	Vitis vinifera	761	566	e-159	0.98	1	2	sp|Q3E7T8	UBQ14_ARATH Polyubiquitin 14	Arabidopsis thalian	305	566	e-161	0.98	1	2
42-H16	751	XP_002309350.1	predicted protein	Populus trichocarpa	624	228	e-116	0.97	0.98	2	sp|Q9U5L1	SRPR_DROME Signal recognition particle receptor subunitalpha homolog	Drosophila melanogaster	614	157	5e-64	0.62	0.76	2
42-H20	888	YP_001523767.1	hypothetical protein AZC_0851	Azorhizobium caulinodans ORS 571	661	72.4	6e-11	0.32	0.49	1
42-H22	501	XP_002278767.1	PREDICTED: hypothetical protein	Vitis vinifera	105	224	2e-57	1	1	1	sp|Q96499	RL44_GOSHI 60S ribosomal protein L44	Gossypiumhirsutum	105	224	2e-58	1	1	1
42-I01	538	XP_002298705.1	predicted protein	Populus trichocarpa	296	216	6e-55	0.71	0.8	1
42-I02	722	XP_002312501.1	predicted protein	Populus trichocarpa	328	194	7e-48	0.59	0.74	3
42-I03	385	EEF47450.1	conserved hypothetical protein	Ricinus communis	69	97.8	3e-19	0.71	0.75	3
42-I04	353	EEF40106.1	protein with unknown function	Ricinus communis	218	229	7e-59	0.98	0.99	3	sp|P40393	RIC2_ORYSJ Ras-related protein RIC2	Oryza sativasubsp. japonica	217	224	2e-58	0.94	0.98	3
42-I09	578	XP_002310501.1	predicted protein	Populus trichocarpa	126	94.4	5e-18	0.51	0.62	2	sp|Q8W490	PEPK2_ARATH Serine/threonine-protein kinase PEPKR2	Arabidopsis thaliana	470	54.7	4e-07	0.5	0.65	2
42-I17	514	CAO45547.1	unnamed protein product	Vitis vinifera	322	315	8e-85	0.98	0.98	3	sp|Q9M4T8	PSA5_SOYBN Proteasome subunit alpha type-5	Glycine ma	237	312	6e-85	1	1	3
42-I20	868	EEF47991.1	conserved hypothetical protein	Ricinus communis	608	116	2e-24	0.67	0.76	1	sp|O95243	MBD4_HUMAN Methyl-CpG-binding domain protein 4	Homosapiens	580	72	5e-12	0.44	0.63	1
42-J10	500	XP_002331848.1	predicted protein	Populus trichocarpa	148	194	5e-79	0.95	0.95	3	sp|P35133	UBC10_ARATH Ubiquitin-conjugating enzyme E2 10	Arabidopsis thaliana	148	189	7e-78	0.93	0.94	3
42-J12	829	XP_002272176.1	PREDICTED: hypothetical protein	Vitis vinifera	640	371	e-101	0.85	0.9	2	sp|Q9LYR6	PTR49_ARATH Probable peptide/nitrate transporterAt5g13400	Arabidopsis thaliana	624	347	6e-95	0.82	0.87	2
42-J20	574	YP_001633404.1	hypothetical protein Bpet4785	Bordetella petrii DSM 12804	225	253	7e-66	0.69	0.77	2
42-K03	874	EEF37653.1	conserved hypothetical protein	Ricinus communis	419	133	2e-29	0.41	0.54	1
42-K04	860	XP_002301474.1	predicted protein	Populus trichocarpa	1223	474	e-132	0.89	0.93	2	sp|Q6NW58	SPAST_DANRE Spastin	Danio rerio	570	202	3e-51	0.44	0.66	2
42-K22	358	XP_002313457.1	predicted protein	Populus trichocarpa	833	54.3	4e-06	0.93	0.96	1	sp|Q9LX66	HERK_ARATH Receptor-like protein kinase HERK 1	Arabidopsis thaliana	830	51.6	2e-06	0.89	0.96	1
42-L02	634	XP_002322169.1	predicted protein	Populus trichocarpa	416	273	8e-72	0.81	0.86	1	sp|Q84QU8	PPT2_ORYSJ Phosphoenolpyruvate/phosphate translocator 2,chloroplastic	Oryza sativa subsp. japonica	407	255	2e-67	0.77	0.83	1
42-L04	866	XP_002314792.1	predicted protein	Populus trichocarpa	199	265	3e-69	0.69	0.82	3
42-L23	696	XP_002282437.1	PREDICTED: hypothetical protein	Vitis vinifera	711	180	1e-43	0.69	0.78	2	sp|Q9SKN5	ARFJ_ARATH Auxin response factor 10	Arabidopsisthaliana	693	153	1e-36	0.58	0.72	2
42-M07	787	XP_002299406.1	predicted protein	Populus trichocarpa	734	174	1e-41	0.5	0.66	2
42-M10	642	XP_002312101.1	hypothetical protein POPTRDRAFT_820349	Populus trichocarpa	258	101	6e-20	0.82	0.9	2	sp|Q38865	EXPA6_ARATH Expansin-A6	Arabidopsis thaliana	257	101	5e-21	0.84	0.88	2
42-M11	848	XP_002283093.1	PREDICTED: hypothetical protein	Vitis vinifera	977	151	7e-35	0.8	0.93	3	sp|Q40554	EIF3A_TOBAC Eukaryotic translation initiation factor 3subunit A	Nicotiana tabacum	958	143	2e-33	0.75	0.89	3
42-M21	835	YP_347072.1	hypothetical protein Pfl01_1340	Pseudomonas fluorescens Pf0-1	241	446	e-123	0.92	0.96	-3
42-M22	856	XP_002285894.1	PREDICTED: hypothetical protein	Vitis vinifera	514	301	4e-80	0.85	0.93	3	sp|Q68FJ8	TM1L2_XENLA TOM1-like protein 2	Xenopus laevi	507	93.2	2e-18	0.38	0.56	3
42-N04	844	EEF30565.1	conserved hypothetical protein	Ricinus communis	680	192	3e-47	0.67	0.71	3
42-N07	781	XP_002306137.1	predicted protein	Populus trichocarpa	242	320	9e-86	0.76	0.83	3	sp|P53849	GIS2_YEAST Zinc finger protein GIS2	Saccharomycescerevisiae	153	104	8e-22	0.3	0.47	3
42-N08	548	XP_002310256.1	predicted protein	Populus trichocarpa	413	177	3e-43	0.58	0.73	2
42-N15	548	XP_002321883.1	predicted protein	Populus trichocarpa	113	154	5e-36	0.72	0.81	1
42-N17	845	EEF31597.1	conserved hypothetical protein	Ricinus communis	204	190	2e-46	0.53	0.59	3	sp|Q6DR24	Y3795_ARATH Uncharacterized protein At3g17950	Arabidopsis thaliana	211	151	5e-36	0.48	0.56	3
42-N20	895	EEF34169.1	conserved hypothetical protein	Ricinus communis	271	387	e-106	0.68	0.76	1
42-O02	707	XP_002264377.1	PREDICTED: hypothetical protein	Vitis vinifera	893	248	4e-64	0.75	0.89	3	sp|Q54RF3	EI2BE_DICDI Translation initiation factor eIF-2B subunitepsilon	Dictyostelium discoideum	707	94	9e-19	0.32	0.55	3
42-O06	699	EEF43617.1	conserved hypothetical protein	Ricinus communis	274	185	4e-45	0.83	0.95	1	sp|Q2KXW3	KYNB_BORA1 Kynurenine formamidase	Bordetella avium(strain 197N)	209	52	4e-06	0.43	0.57	1
42-O16	869	XP_002264130.1	PREDICTED: hypothetical protein	Vitis vinifera	1733	399	e-109	0.67	0.82	2	sp|Q0WNP3	PP319_ARATH Pentatricopeptide repeat-containing proteinAt4g18520	Arabidopsis thaliana	617	183	1e-45	0.35	0.55	2
42-O23	814	XP_002302935.1	predicted protein	Populus trichocarpa	137	233	2e-59	0.73	0.9	3	sp|Q9CXS4	CENPV_MOUSE Centromere protein V	Mus musculus	252	132	2e-30	0.52	0.64	3
42-P11	327	XP_002274784.1	PREDICTED: hypothetical protein	Vitis vinifera	186	111	2e-23	0.89	0.94	3	sp|Q8L3R2	CML41_ARATH Probable calcium-binding protein CML41	Arabidopsis thaliana	205	96.7	4e-20	0.75	0.91	3
42-P17	843	CAO38681.1	unnamed protein product	Vitis vinifera	254	263	2e-68	0.82	0.91	1	sp|O81263	KITH_ORYSJ Thymidine kinase	Oryza sativa subsp.japonica	271	224	8e-58	0.72	0.84	1
43-A01	735	XP_002280446.1	PREDICTED: hypothetical protein	Vitis vinifera	513	349	2e-94	0.88	0.93	3	sp|O04887	PME2_CITSI Pectinesterase 2	Citrus sinensi	510	344	3e-94	0.86	0.95	3
43-B06	490	XP_002314548.1	predicted protein	Populus trichocarpa	825	171	2e-41	0.76	0.93	3	sp|Q9CAG3	LOX6_ARATH Lipoxygenase 6, choloroplastic	Arabidopsisthaliana	917	144	3e-34	0.67	0.84	3
43-B18	850	XP_002273444.1	PREDICTED: hypothetical protein	Vitis vinifera	771	401	e-110	0.76	0.85	2	sp|Q38861	XPB1_ARATH DNA repair helicase XPB1	Arabidopsisthaliana	767	378	e-104	0.72	0.81	2
43-C14	879	XP_002329034.1	predicted protein	Populus trichocarpa	512	350	8e-95	0.92	0.94	3	sp|Q39247	2ABB_ARATH Serine/threonine protein phosphatase 2A 55 kDaregulatory subunit B beta isoform	Arabidopsisthaliana	501	333	1e-90	0.85	0.92	3
43-C17	774	CAO41506.1	unnamed protein product	Vitis vinifera	190	218	4e-55	0.63	0.73	1	sp|Q87JZ5	Y4103_VIBPA UPF0189 protein VPA0103	Vibrioparahaemolyticus	170	104	6e-25	0.46	0.65	1
43-D08	762	EEF49388.1	conserved hypothetical protein	Ricinus communis	81	123	2e-26	0.75	0.81	1
43-E04	190	YP_258382.1	hypothetical protein PFL_1251	Pseudomonas fluorescens Pf-5	882	130	3e-29	0.96	0.98	-1
43-F06	743	XP_002278270.1	PREDICTED: hypothetical protein	Vitis vinifera	105	119	2e-25	0.68	0.81	2
43-F23	842	XP_002314383.1	predicted protein	Populus trichocarpa	814	304	8e-81	0.6	0.7	2
43-G04	637	XP_002451109.1	hypothetical protein SORBIDRAFT_05g024215	Sorghum bicolor	357	57.4	3e-10	0.26	0.42	-1
43-G10	578	XP_002269458.1	PREDICTED: hypothetical protein	Vitis vinifera	393	60.1	1e-07	0.34	0.43	3
43-H24	813	XP_002311413.1	predicted protein	Populus trichocarpa	302	266	2e-69	0.56	0.67	2
43-I01	279	XP_002303015.1	predicted protein	Populus trichocarpa	378	153	5e-36	0.8	0.92	1	sp|C0LGG6	Y5189_ARATH Probable LRR receptor-like protein kinaseAt1g51890	Arabidopsis thaliana	876	55.8	8e-08	0.4	0.58	1
43-I24	845	YP_001564023.1	hypothetical protein Daci_3000	Delftia acidovorans SPH-1	231	310	8e-83	0.75	0.84	-1
43-J13	855	XP_002319418.1	predicted protein	Populus trichocarpa	192	290	1e-76	0.73	0.79	2	sp|Q8BX32	SLX1_MOUSE Structure-specific endonuclease subunit SLX1	Mus musculus	270	135	3e-31	0.37	0.55	2
43-J15	851	XP_002298876.1	predicted protein	Populus trichocarpa	652	272	3e-71	0.56	0.64	2	sp|Q9C9N6	PMI2_ARATH Protein PLASTID MOVEMENT IMPAIRED 2	Arabidopsis thaliana	607	63.5	2e-09	0.25	0.47	2
43-J16	820	EEF29047.1	conserved hypothetical protein	Ricinus communis	626	254	5e-66	0.77	0.81	1	sp|Q9M1Y3	SKI35_ARATH F-box/ankyrin repeat protein SKIP35	Arabidopsis thaliana	611	185	4e-46	0.6	0.73	1
43-J19	841	XP_002275502.1	PREDICTED: hypothetical protein	Vitis vinifera	213	372	e-101	0.84	0.92	3	sp|Q6GPW4	TM205_XENLA Transmembrane protein 205	Xenopus laevi	188	115	5e-25	0.34	0.56	3
43-L01	378	EEF36728.1	conserved hypothetical protein	Ricinus communis	448	92	2e-17	0.77	0.86	1
43-L02	902	XP_002301611.1	predicted protein	Populus trichocarpa	303	370	e-100	0.77	0.87	1	sp|Q69KJ0	RTL3_ORYSJ Ribonuclease 3-like protein 3	Oryza sativasubsp. japonica	299	241	4e-63	0.52	0.67	1
43-L06	896	XP_002282799.1	PREDICTED: hypothetical protein	Vitis vinifera	193	285	3e-75	0.8	0.95	1
43-L17	589	XP_002283195.1	PREDICTED: hypothetical protein	Vitis vinifera	231	303	5e-81	0.9	0.94	3	sp|Q8LD27	PSB6_ARATH Proteasome subunit beta type-6	Arabidopsisthaliana	233	292	9e-79	0.84	0.92	3
43-L18	752	XP_002304731.1	predicted protein	Populus trichocarpa	135	257	9e-67	0.93	0.97	3	sp|Q3T0F2	TPPC2_BOVIN Trafficking protein particle complex subunit2	Bos taurus	140	139	2e-32	0.47	0.68	3
43-L20	804	XP_002263162.1	PREDICTED: hypothetical protein	Vitis vinifera	427	358	2e-97	0.77	0.88	3	sp|P52877	SERC_SPIOL Phosphoserine aminotransferase, chloroplastic	Spinacia oleracea	430	336	1e-91	0.66	0.75	3
43-L22	884	EEF35527.1	conserved hypothetical protein	Ricinus communis	268	253	2e-65	0.53	0.62	1
43-M01	793	XP_002282431.1	PREDICTED: hypothetical protein isoform 2	Vitis vinifera	361	406	e-111	0.96	0.99	3	sp|Q54K39	GMPPB_DICDI Mannose-1-phosphate guanyltransferase beta	Dictyostelium discoideum	359	304	4e-82	0.69	0.85	3
43-N09	800	YP_173420.1	hypothetical protein NitaMp078	Nicotiana tabacum	122	128	7e-28	0.85	0.88	2
43-P11	507	XP_002269271.1	PREDICTED: hypothetical protein	Vitis vinifera	143	201	2e-50	0.75	0.81	2	sp|Q9ST43	PH1_ARATH Pleckstrin homology domain-containing protein 1	Arabidopsis thaliana	145	194	2e-49	0.71	0.81	2
43-P12	700	XP_002321555.1	predicted protein	Populus trichocarpa	301	431	e-119	0.92	0.95	3	sp|Q5XFW8	SEC13_RAT Protein SEC13 homolog	Rattus norvegicu	322	235	2e-61	0.51	0.68	3
44-A13	433	ZP_04243068.1	hypothetical protein bcere0018_57910	Bacillus cereus Rock1-15	586	74.7	3e-12	1	1	-3
44-B17	485	XP_002300227.1	predicted protein	Populus trichocarpa	644	293	4e-78	0.86	0.95	2	sp|P42731	PABP2_ARATH Polyadenylate-binding protein 2	Arabidopsis thaliana	629	270	4e-72	0.81	0.93	2
44-C08	786	XP_002267395.1	PREDICTED: hypothetical protein	Vitis vinifera	1103	484	e-135	0.88	0.94	3	sp|P92974	UBE12_ARATH Ubiquitin-activating enzyme E1 2	Arabidopsisthaliana	1077	468	e-131	0.86	0.92	3
44-D05	483	XP_002326350.1	predicted protein	Populus trichocarpa	284	190	5e-47	0.91	0.95	3	sp|Q3TEL6	RN157_MOUSE RING finger protein 157	Mus musculu	685	98.2	2e-20	0.52	0.67	3
44-D10	657	XP_002316166.1	predicted protein	Populus trichocarpa	736	295	3e-78	0.66	0.81	1
44-E09	481	XP_002284967.1	PREDICTED: hypothetical protein	Vitis vinifera	221	90.5	5e-17	0.74	0.74	3	sp|P54766	RAN1B_LOTJA GTP-binding nuclear protein Ran1B (Fragment)	Lotus japonicus	209	86.3	8e-17	0.71	0.72	3
44-J12	776	EEF46901.1	conserved hypothetical protein	Ricinus communis	230	340	1e-91	0.86	0.92	1	sp|Q93VG8	U326_ARATH UPF0326 protein At4g17486	Arabidopsisthaliana	224	215	3e-55	0.61	0.8	1
44-K01	577	XP_002263520.1	PREDICTED: hypothetical protein	Vitis vinifera	389	204	3e-51	0.52	0.68	3	sp|Q5E930	SLAH1_ARATH S-type anion channel SLAH1	Arabidopsisthaliana	385	178	2e-44	0.51	0.63	3
44-N03	759	EEF50925.1	conserved hypothetical protein	Ricinus communis	236	255	3e-66	0.58	0.73	3	sp|Q9LK32	Y3721_ARATH Uncharacterized protein At3g27210	Arabidopsis thaliana	234	92	4e-18	0.37	0.51	3
44-N19	712	CAO21344.1	unnamed protein product	Vitis vinifera	355	131	7e-29	0.45	0.59	2
44-N22	565	XP_002331848.1	predicted protein	Populus trichocarpa	148	313	7e-84	0.99	1	2	sp|P35133	UBC10_ARATH Ubiquitin-conjugating enzyme E2 10	Arabidopsis thaliana	148	308	2e-83	0.97	0.99	2
44-O06	888	XP_002275623.1	PREDICTED: hypothetical protein	Vitis vinifera	642	387	e-106	0.62	0.72	1	sp|Q9FLV9	SLAH3_ARATH S-type anion channel SLAH3	Arabidopsisthaliana	635	349	1e-95	0.56	0.67	1
44-O12	835	AAS55787.1	hypothetical protein	Oryza sativa Japonica Group	1936	75.1	8e-12	0.22	0.43	-1
44-O17	441	XP_002277029.1	PREDICTED: similar to AtRPN1a/RPN1A (26S proteasome regulatorysubunit S2 1A); binding	Vitis vinifera	890	167	3e-40	0.91	0.95	1	sp|Q9SIV2	RPN1A_ARATH 26S proteasome non-ATPase regulatory subunit2 1A	Arabidopsis thaliana	891	156	4e-38	0.84	0.92	1
44-P05	407	ABK94046.1	unknown	Populus trichocarpa	303	97.1	5e-19	0.66	0.73	2	sp|Q38830	IAA12_ARATH Auxin-responsive protein IAA12	Arabidopsisthaliana	239	71.6	1e-12	0.55	0.61	2
44-P11	903	EEF46149.1	conserved hypothetical protein	Ricinus communis	262	146	3e-33	0.46	0.57	1
44-P19	500	XP_002318927.1	predicted protein	Populus trichocarpa	344	116	9e-25	0.77	0.88	2
45-A08	871	XP_002321905.1	predicted protein	Populus trichocarpa	333	227	1e-57	0.51	0.56	3
45-A11	839	XP_002285097.1	PREDICTED: hypothetical protein	Vitis vinifera	322	145	4e-33	0.35	0.56	2	sp|P29382	SEP1_ARATH Developmental protein SEPALLATA 1	Arabidopsis thaliana	251	89.4	3e-17	0.4	0.56	2
45-A19	863	XP_002325532.1	predicted protein	Populus trichocarpa	346	350	1e-94	0.76	0.84	1	sp|Q9FVW3	Y1399_ARATH Probable esterase At1g33990	Arabidopsisthaliana	348	321	4e-87	0.69	0.8	1
45-B05	855	XP_002333242.1	predicted protein	Populus trichocarpa	470	409	e-112	0.84	0.93	3	sp|Q8L868	E1311_ARATH Glucan endo-1,3-beta-glucosidase 11	Arabidopsis thaliana	426	195	3e-49	0.41	0.65	3
45-B09	712	XP_002274726.1	PREDICTED: hypothetical protein	Vitis vinifera	534	444	e-123	0.9	0.95	3	sp|Q8TCT7	PSL1_HUMAN Signal peptide peptidase-like 2B	Homosapiens	592	150	8e-36	0.41	0.58	3
45-B16	529	XP_002314725.1	predicted protein	Populus trichocarpa	508	142	2e-35	0.64	0.73	3
45-C23	928	XP_002312173.1	predicted protein	Populus trichocarpa	519	288	5e-76	0.65	0.77	1
45-D03	741	XP_002264417.1	PREDICTED: hypothetical protein isoform 1	Vitis vinifera	466	306	9e-82	0.74	0.83	2	sp|P58223	Y4837_ARATH KH domain-containing protein At4g18375	Arabidopsis thaliana	606	76.3	2e-13	0.32	0.53	2
45-D06	519	EEF42208.1	conserved hypothetical protein	Ricinus communis	168	175	2e-42	0.57	0.76	2
45-D09	392	XP_002324143.1	predicted protein	Populus trichocarpa	679	75.9	1e-12	0.39	0.5	-3	sp|Q8S8S7	PUB34_ARATH U-box domain-containing protein 34	Arabidopsis thaliana	801	50.8	3e-06	0.5	0.67	-3
45-D15	141	YP_372786.1	hypothetical protein Bcep18194_B2029	Burkholderia sp. 383	141	75.9	1e-12	0.73	0.8	-3
45-D23	544	XP_002325135.1	predicted protein	Populus trichocarpa	531	239	9e-62	0.81	0.83	3	sp|P59583	WRK32_ARATH Probable WRKY transcription factor 32	Arabidopsis thaliana	466	196	7e-50	0.69	0.76	3
45-E03	824	EEF50217.1	conserved hypothetical protein	Ricinus communis	131	154	1e-35	0.86	0.9	3
45-E19	224	YP_002870264.1	hypothetical protein PFLU0594	Pseudomonas fluorescens SBW25	460	142	1e-32	0.86	0.94	2
45-E21	936	CAO17343.1	unnamed protein product	Vitis vinifera	299	271	7e-71	0.61	0.65	3	sp|A2A6A1	GPTC8_MOUSE G patch domain-containing protein 8	Musmusculus	1505	105	4e-22	0.4	0.67	3
45-F04	220	EEF36193.1	conserved hypothetical protein	Ricinus communis	535	65.1	2e-09	0.8	0.91	2
45-F09	928	XP_002326433.1	predicted protein	Populus trichocarpa	235	385	e-105	0.81	0.87	3	sp|Q9SHI7	UBC34_ARATH Ubiquitin-conjugating enzyme E2 34	Arabidopsis thaliana	237	375	e-103	0.76	0.86	3
45-F19	672	XP_002321087.1	predicted protein	Populus trichocarpa	284	325	2e-87	0.87	0.91	1	sp|P35694	BRU1_SOYBN Brassinosteroid-regulated protein BRU1	Glycine max	283	294	3e-79	0.81	0.85	1
45-F23	144	YP_002873458.1	hypothetical protein PFLU3906	Pseudomonas fluorescens SBW25	174	74.7	3e-12	0.76	0.86	3
45-G01	782	ACJ84986.1	unknown	Medicago truncatula	338	343	1e-92	0.74	0.84	1	sp|Q3AF07	DNAJ_CARHZ Chaperone protein dnaJ	Carboxydothermushydrogenoformans (strain Z-2901 / DSM 6008)	381	67.4	1e-10	0.5	0.62	1
45-G05	803	XP_002310815.1	predicted protein	Populus trichocarpa	454	94.4	1e-17	0.63	0.75	2
45-G13	428	CAO15395.1	unnamed protein product	Vitis vinifera	1106	163	6e-39	0.62	0.8	1
45-G15	583	ABK93560.1	unknown	Populus trichocarpa	281	223	8e-57	0.58	0.74	1
45-H06	773	XP_002269288.1	PREDICTED: hypothetical protein	Vitis vinifera	1732	105	5e-21	0.44	0.67	3
45-H07	231	XP_002283981.1	PREDICTED: hypothetical protein	Vitis vinifera	873	90.1	7e-17	0.69	0.77	2
45-H11	813	XP_002264738.1	PREDICTED: hypothetical protein	Vitis vinifera	150	195	4e-48	0.79	0.8	2	sp|Q43582	LSM4_TOBAC Probable U6 snRNA-associated Sm-like proteinLSm4	Nicotiana tabacum	146	192	2e-48	0.77	0.79	2
45-H13	830	XP_002331481.1	predicted protein	Populus trichocarpa	198	239	3e-61	0.68	0.76	2	sp|P25864	RK9_ARATH 50S ribosomal protein L9, chloroplastic	Arabidopsis thaliana	197	234	7e-61	0.65	0.76	2
45-H24	732	NP_886229.1	hypothetical protein BPP4091	Bordetella parapertussis 12822	322	350	6e-95	0.76	0.84	3
45-I16	817	CAO62825.1	unnamed protein product	Vitis vinifera	303	237	8e-71	0.72	0.81	1	sp|Q55DY8	MFRN_DICDI Mitoferrin	Dictyostelium discoideum	308	58.2	6e-14	0.25	0.49	1
45-I20	680	XP_002311814.1	predicted protein	Populus trichocarpa	921	355	2e-96	0.74	0.84	2	sp|B1KHA5	RIHA_SHEWM Pyrimidine-specific ribonucleoside hydrolaserihA	Shewanella woodyi (strain ATCC 51908 / MS32	312	61.2	6e-09	0.35	0.44	2
45-J03	487	XP_002278032.1	PREDICTED: hypothetical protein	Vitis vinifera	231	68.9	2e-10	0.91	0.94	2	sp|P34091	RL6_MESCR 60S ribosomal protein L6	Mesembryanthemumcrystallinum	234	65.5	2e-10	0.81	0.94	2
45-J11	808	EEF31651.1	conserved hypothetical protein	Ricinus communis	344	382	e-104	0.88	0.94	2	sp|Q9WVQ0	PMFBP_MOUSE Polyamine-modulated factor 1-binding protein 1	Mus musculus	1022	56.2	3e-07	0.24	0.45	2
45-J16	882	XP_002275491.1	PREDICTED: hypothetical protein	Vitis vinifera	765	421	e-116	0.68	0.81	3	sp|Q9LKU8	PP401_ARATH Pentatricopeptide repeat-containing proteinAt5g28460	Arabidopsis thaliana	766	283	1e-75	0.49	0.66	3
45-K01	740	XP_002279091.1	PREDICTED: hypothetical protein	Vitis vinifera	499	447	e-124	0.86	0.95	3	sp|O80437	GPAT6_ARATH Glycerol-3-phosphate acyltransferase 6	Arabidopsis thaliana	501	423	e-118	0.8	0.91	3
45-K04	708	EEF46734.1	conserved hypothetical protein	Ricinus communis	460	272	2e-71	0.89	0.94	2
45-K10	726	EEF40420.1	conserved hypothetical protein	Ricinus communis	439	216	2e-54	0.69	0.77	3
45-L02	758	XP_002328797.1	predicted protein	Populus trichocarpa	679	480	e-134	0.9	0.96	1	sp|Q9SY66	FRS11_ARATH Protein FAR1-RELATED SEQUENCE 11	Arabidopsis thaliana	680	449	e-126	0.82	0.94	1
45-L04	870	XP_002268265.1	PREDICTED: hypothetical protein	Vitis vinifera	1138	436	e-120	0.97	0.99	3	sp|Q94AI7	TPL_ARATH Protein TOPLESS	Arabidopsis thaliana	1131	431	e-120	0.96	0.97	3
45-L07	805	XP_002269746.1	PREDICTED: hypothetical protein	Vitis vinifera	174	304	6e-81	0.85	0.93	1	sp|Q86SZ2	TPC6B_HUMAN Trafficking protein particle complex subunit6B	Homo sapiens	158	135	3e-31	0.48	0.68	1
45-L17	586	XP_002277445.1	PREDICTED: hypothetical protein	Vitis vinifera	343	367	e-100	0.89	0.96	1	sp|Q9S709	U2AFA_ARATH Splicing factor U2af small subunit A	Arabidopsis thaliana	296	341	2e-93	0.83	0.93	1
45-L18	797	CAN74342.1	hypothetical protein	Vitis vinifera	661	254	8e-66	0.6	0.66	3	sp|P93008	RH21_ARATH DEAD-box ATP-dependent RNA helicase 21	Arabidopsis thaliana	733	238	3e-62	0.88	0.96	3
45-L23	824	XP_002297754.1	predicted protein	Populus trichocarpa	318	341	4e-92	0.68	0.82	2	sp|Q9SE45	ANXD3_ARATH Annexin D3	Arabidopsis thaliana	321	279	1e-74	0.54	0.75	2
45-M07	814	XP_002309088.1	predicted protein	Populus trichocarpa	209	343	1e-92	0.79	0.85	3	sp|Q9LZM7	PR1A1_ARATH PRA1 family protein A1	Arabidopsisthaliana	209	307	5e-83	0.71	0.78	3
45-M21	354	XP_002263930.1	PREDICTED: hypothetical protein	Vitis vinifera	862	71.6	2e-11	0.88	0.94	3
45-N19	683	XP_002329700.1	predicted protein	Populus trichocarpa	129	219	2e-55	0.79	0.86	1
45-O09	786	XP_002314377.1	predicted protein	Populus trichocarpa	726	294	7e-78	0.74	0.86	2	sp|Q39659	MFPA_CUCSA Glyoxysomal fatty acid beta-oxidationmultifunctional protein MFP-a	Cucumis sativus	725	280	1e-74	0.7	0.82	2
45-O11	507	XP_002305632.1	predicted protein	Populus trichocarpa	260	69.3	1e-10	0.59	0.72	3
45-O12	748	XP_002326513.1	predicted protein	Populus trichocarpa	526	216	1e-54	0.66	0.83	2
45-O13	780	EEF32734.1	conserved hypothetical protein	Ricinus communis	442	183	1e-44	0.44	0.53	3
45-O15	834	XP_002268226.1	PREDICTED: hypothetical protein	Vitis vinifera	334	421	e-116	0.89	0.94	2	sp|Q58E77	WD82B_XENLA WD repeat-containing protein 82-B	Xenopuslaevis	313	199	2e-50	0.44	0.67	2
45-O16	596	YP_002873414.1	hypothetical protein PFLU3860	Pseudomonas fluorescens SBW25	421	300	7e-80	0.94	0.99	3	sp|P54998	SOXC_RHOSG Dibenzothiophene desulfurization enzyme C	Rhodococcus sp. (strain IGTS8)	417	91.7	3e-18	0.36	0.52	3
45-P04	772	XP_002272557.1	PREDICTED: hypothetical protein	Vitis vinifera	306	296	1e-78	0.61	0.73	3	sp|Q562C4	MET7B_RAT Methyltransferase-like protein 7B	Rattusnorvegicus	244	110	1e-23	0.39	0.53	3
45-P09	864	XP_002280640.1	PREDICTED: hypothetical protein	Vitis vinifera	737	333	1e-89	0.57	0.7	1	sp|Q0WVN5	CSLG3_ARATH Cellulose synthase-like protein G3	Arabidopsis thaliana	751	201	5e-51	0.42	0.59	1
45-P18	878	XP_002323053.1	predicted protein	Populus trichocarpa	465	379	e-103	0.62	0.76	3	sp|Q8RWZ5	SD25_ARATH G-type lectin S-receptor-likeserine/threonine-protein kinase SD2-5	Arabidopsisthaliana	821	77.4	1e-13	0.25	0.44	3
45-P22	827	XP_002280501.1	PREDICTED: hypothetical protein	Vitis vinifera	376	236	1e-60	0.56	0.7	1
CO000004	1204	XP_002281552.1	PREDICTED: hypothetical protein	Vitis vinifera	1349	583	e-164	0.84	0.92	1	sp|P43298	TMK1_ARATH Probable receptor protein kinase TMK1	Arabidopsis thaliana	942	520	e-147	0.76	0.86	1
CO000008	820	XP_002319495.1	predicted protein	Populus trichocarpa	215	253	2e-65	0.59	0.72	2	sp|Q84J78	SSBP_ARATH Single-stranded DNA-binding protein,mitochondrial	Arabidopsis thaliana	201	249	1e-65	0.59	0.72	2
CO000009	1202	AAA79366.1	unknown	Gossypium hirsutum	263	409	e-112	0.82	0.82	2	sp|Q9SJ81	FLA7_ARATH Fasciclin-like arabinogalactan protein 7	Arabidopsis thaliana	254	214	1e-54	0.51	0.68	2
CO000010	1091	XP_002315028.1	predicted protein	Populus trichocarpa	422	521	e-146	0.81	0.84	1	sp|Q8BG32	PSD11_MOUSE 26S proteasome non-ATPase regulatory subunit 11	Mus musculus	422	249	2e-65	0.4	0.59	1
CO000016	1744	XP_002263156.1	PREDICTED: hypothetical protein	Vitis vinifera	416	688	0	0.81	0.84	2	sp|Q04960	DNJH_CUCSA DnaJ protein homolog	Cucumis sativus	413	668	0	0.8	0.84	2
CO000018	750	XP_002285353.1	PREDICTED: hypothetical protein isoform 2	Vitis vinifera	170	252	2e-65	0.76	0.87	1	sp|Q8LBK6	GRS15_ARATH Monothiol glutaredoxin-S15, mitochondrial	Arabidopsis thaliana	169	222	2e-57	0.67	0.81	1
CO000019	757	XP_002316317.1	predicted protein	Populus trichocarpa	212	355	2e-96	0.8	0.9	2	sp|Q9FRL8	DHAR2_ARATH Glutathione S-transferase DHAR2	Arabidopsis thaliana	213	349	1e-95	0.78	0.89	2
CO000023	1643	XP_002324315.1	predicted protein	Populus trichocarpa	362	650	0	0.85	0.91	1
CO000024	1774	XP_002277003.1	PREDICTED: hypothetical protein	Vitis vinifera	479	749	0	0.81	0.88	1	sp|Q6NKW9	E138_ARATH Glucan endo-1,3-beta-glucosidase 8	Arabidopsis thaliana	481	723	0	0.76	0.85	1
CO000028	676	EEF32936.1	conserved hypothetical protein	Ricinus communis	99	181	4e-44	0.94	0.95	1	sp|P55852	SUMO1_ARATH Small ubiquitin-related modifier 1	Arabidopsis thaliana	100	174	6e-43	0.9	0.92	1
CO000030	660	XP_002274855.1	PREDICTED: hypothetical protein	Vitis vinifera	239	157	1e-36	0.67	0.82	1
CO000031	963	EEF37134.1	conserved hypothetical protein	Ricinus communis	247	374	e-102	0.78	0.86	1
CO000032	1003	XP_002270904.1	PREDICTED: hypothetical protein isoform 1	Vitis vinifera	630	293	2e-77	0.68	0.78	2	sp|Q8H1Z0	WAX2_ARATH Protein WAX2	Arabidopsis thaliana	632	268	5e-71	0.6	0.74	2
CO000034	722	EEF49984.1	conserved hypothetical protein	Ricinus communis	168	249	1e-64	0.75	0.87	1
CO000036	1318	XP_002272669.1	PREDICTED: hypothetical protein	Vitis vinifera	341	630	e-179	0.9	0.95	1	sp|Q9LZG0	ADK2_ARATH Adenosine kinase 2	Arabidopsis thalian	345	602	e-171	0.86	0.94	1
CO000037	828	EEF45778.1	conserved hypothetical protein	Ricinus communis	272	261	6e-68	0.61	0.77	3
CO000045	276	BAE98425.1	hypothetical protein	Arabidopsis thaliana	80	102	2e-20	0.88	0.94	1	sp|Q8TGM5	ART3_YEAST Putative uncharacterized protein ART3	Saccharomyces cerevisiae	67	55.8	8e-08	0.81	0.84	-3
CO000051	1023	XP_002302788.1	predicted protein	Populus trichocarpa	181	366	2e-99	1	1	2	sp|P51823	ARF2_ORYSJ ADP-ribosylation factor 2	Oryza sativasubsp. japonica	181	363	1e-99	0.98	1	2
CO000052	744	ACJ86246.1	unknown	Medicago truncatula	146	291	3e-77	0.93	0.95	3	sp|Q9SVD7	UEV1D_ARATH Ubiquitin-conjugating enzyme E2 variant 1D	Arabidopsis thaliana	146	280	9e-75	0.89	0.92	3
CO000058	802	ABK96569.1	unknown	Populus trichocarpa x Populus deltoides	158	270	9e-71	0.85	0.9	2	sp|Q9FHW7	SKP1B_ARATH SKP1-like protein 1B	Arabidopsis thalian	171	247	8e-65	0.72	0.81	2
CO000060	629	XP_002272119.1	PREDICTED: hypothetical protein	Vitis vinifera	365	249	1e-64	0.82	0.92	-2	sp|Q39224	SRG1_ARATH Protein SRG1	Arabidopsis thaliana	358	127	6e-29	0.47	0.62	-2
CO000062	797	XP_002306888.1	predicted protein	Populus trichocarpa	155	157	1e-36	0.61	0.73	2	sp|P24068	OCS1_MAIZE Ocs element-binding factor 1	Zea may	151	81.6	6e-15	0.51	0.67	2
CO000067	807	YP_002870837.1	putative phage hypothetical protein	Pseudomonas fluorescens SBW25	190	150	1e-34	0.8	0.88	2
CO000074	1274	XP_002317490.1	predicted protein	Populus trichocarpa	253	451	e-125	0.82	0.9	-2
CO000076	973	EEF34169.1	conserved hypothetical protein	Ricinus communis	271	344	7e-93	0.62	0.71	1
CO000077	682	XP_002264862.1	PREDICTED: hypothetical protein	Vitis vinifera	186	120	8e-26	0.49	0.61	2
CO000078	971	CAN72399.1	hypothetical protein	Vitis vinifera	315	317	9e-85	0.62	0.78	2
CO000079	985	XP_002318774.1	predicted protein	Populus trichocarpa	269	241	6e-62	0.48	0.65	2	sp|P13284	GILT_HUMAN Gamma-interferon-inducible lysosomal thiolreductase	Homo sapiens	261	106	2e-22	0.35	0.54	2
CO000082	876	EEF29610.1	conserved hypothetical protein	Ricinus communis	356	373	e-101	0.86	0.95	3	sp|Q5RBI3	PSD12_PONAB 26S proteasome non-ATPase regulatory subunit12	Pongo abelii	456	167	9e-41	0.42	0.61	3
CO000084	871	EEF39567.1	conserved hypothetical protein	Ricinus communis	523	331	5e-89	0.71	0.78	1
CO000085	887	XP_002307383.1	predicted protein	Populus trichocarpa	211	256	2e-66	0.65	0.71	1
CO000089	938	XP_002275765.1	PREDICTED: hypothetical protein	Vitis vinifera	193	318	5e-85	0.82	0.84	-2	sp|O04834	SAR1A_ARATH GTP-binding protein SAR1A	Arabidopsisthaliana	193	310	7e-84	0.8	0.84	-2
CO000091	1275	XP_002285514.1	PREDICTED: hypothetical protein	Vitis vinifera	476	554	e-156	0.93	0.96	3	sp|Q54XK2	SC61A_DICDI Protein transport protein Sec61 subunit alpha	Dictyostelium discoideum	475	461	e-129	0.76	0.87	3
CO000094	826	ABK96322.1	unknown	Populus trichocarpa x Populus deltoides	239	312	2e-83	0.66	0.78	2	sp|Q9SX77	UMP6_ARATH Uncharacterized protein At1g47420,mitochondrial	Arabidopsis thaliana	257	269	2e-71	0.72	0.87	2
CO000096	857	XP_002271271.1	PREDICTED: hypothetical protein	Vitis vinifera	184	324	8e-87	0.86	0.89	2	sp|Q66HA6	ARL8B_RAT ADP-ribosylation factor-like protein 8B	Rattus norvegicus	186	229	1e-59	0.57	0.74	2
CO000097	905	XP_002313006.1	predicted protein	Populus trichocarpa	207	223	2e-56	0.7	0.73	2	sp|P59228	VATL2_ARATH V-type proton ATPase 16 kDa proteolipidsubunit c2	Arabidopsis thaliana	165	223	2e-57	0.74	0.74	2
CO000098	891	XP_002267642.1	PREDICTED: hypothetical protein	Vitis vinifera	172	258	4e-67	0.74	0.9	1	sp|A5PKK7	GORAB_BOVIN RAB6-interacting golgin	Bos tauru	370	64.3	1e-09	0.31	0.46	1
CO000099	754	YP_026259.1	predicted regulator of arylsulfatase activity	Escherichia colistr. K-12 substr. MG1655	411	526	e-148	1	1	2	sp|P25550	ASLB_ECOLI Anaerobic sulfatase-maturating enzyme homologAslB	Escherichia coli (strain K12)	411	526	e-149	1	1	2
CO000100	1123	XP_002319744.1	predicted protein	Populus trichocarpa	489	350	2e-94	0.69	0.78	3	sp|Q9LYT3	TT12_ARATH Protein TRANSPARENT TESTA 12	Arabidopsisthaliana	507	205	6e-52	0.41	0.58	3
CO000101	722	EEF47031.1	conserved hypothetical protein	Ricinus communis	725	227	7e-58	0.92	0.95	1	sp|Q9FIE3	VIN3_ARATH Protein VERNALIZATION INSENSITIVE 3	Arabidopsis thaliana	620	90.1	1e-17	0.49	0.66	1
CO000102	640	XP_002264142.1	PREDICTED: hypothetical protein	Vitis vinifera	145	165	3e-39	0.98	0.98	3	sp|O22582	H2B_GOSHI Histone H2B	Gossypium hirsutum	147	165	3e-40	0.98	0.98	3
CO000103	1723	CAO68331.1	unnamed protein product	Vitis vinifera	433	622	e-176	0.71	0.82	1	sp|Q94CD1	HHT1_ARATH Omega-hydroxypalmitate O-feruloyl transferase	Arabidopsis thaliana	457	552	e-156	0.62	0.75	1
CO000105	1051	XP_002327437.1	predicted protein	Populus trichocarpa	266	243	2e-62	0.5	0.58	1
CO000107	775	XP_002282294.1	PREDICTED: hypothetical protein	Vitis vinifera	151	282	2e-74	0.97	0.98	2	sp|Q945U1	RS15_ELAOL 40S ribosomal protein S15	Elaeis oleifer	153	268	3e-71	0.94	0.97	2
CO000110	930	XP_002320694.1	predicted protein	Populus trichocarpa	255	323	1e-86	0.83	0.9	1	sp|P31166	APT1_ARATH Adenine phosphoribosyltransferase 1,chloroplastic	Arabidopsis thaliana	243	297	8e-80	0.77	0.87	1
CO000111	1266	ACJ84304.1	unknown	Medicago truncatula	324	469	e-130	0.7	0.84	1	sp|Q8BYK4	RDH12_MOUSE Retinol dehydrogenase 12	Mus musculu	316	204	1e-51	0.41	0.58	1
CO000112	984	XP_002279266.1	PREDICTED: hypothetical protein	Vitis vinifera	223	436	e-120	0.95	0.98	-1	sp|O82531	PSB1_PETHY Proteasome subunit beta type-1	Petuniahybrida	223	424	e-118	0.92	0.97	-1
CO000114	1318	XP_002281785.1	PREDICTED: hypothetical protein	Vitis vinifera	340	472	e-131	0.69	0.78	3
CO000115	1368	ABK94713.1	unknown	Populus trichocarpa	337	304	2e-80	0.55	0.63	1
CO000116	1161	XP_002272354.1	PREDICTED: hypothetical protein	Vitis vinifera	362	493	e-137	0.91	0.93	3	sp|B9DFG5	PTI13_ARATH PTI1-like tyrosine-protein kinase 3	Arabidopsis thaliana	408	479	e-134	0.87	0.91	3
CO000119	524	XP_002302417.1	predicted protein	Populus trichocarpa	78	127	6e-28	0.76	0.79	2	sp|O64818	Y2309_ARATH Uncharacterized protein At2g23090	Arabidopsis thaliana	78	123	7e-28	0.75	0.78	2
CO000120	863	EEF50599.1	conserved hypothetical protein	Ricinus communis	253	399	e-109	0.77	0.86	1	sp|O82352	RTNLE_ARATH Reticulon-like protein B5	Arabidopsisthaliana	255	350	6e-96	0.68	0.8	1
CO000121	1281	XP_002303634.1	predicted protein	Populus trichocarpa	462	496	e-138	0.73	0.81	1
CO000122	993	XP_002322794.1	predicted protein	Populus trichocarpa	209	284	9e-75	0.65	0.78	2
CO000129	1247	ABK94105.1	unknown	Populus trichocarpa	499	493	e-137	0.64	0.77	2	sp|Q766C2	NEP2_NEPGR Aspartic proteinase nepenthesin-2	Nepenthesgracilis	438	197	1e-49	0.35	0.49	2
CO000134	1505	EEF33829.1	conserved hypothetical protein	Ricinus communis	408	493	e-137	0.64	0.74	2	sp|Q84WQ5	CBSX5_ARATH CBS domain-containing protein CBSX5	Arabidopsis thaliana	391	351	7e-96	0.48	0.65	2
CO000139	1620	XP_002320559.1	predicted protein	Populus trichocarpa	545	636	e-180	0.76	0.86	1	sp|Q9FDW0	FRIGI_ARATH Protein FRIGIDA	Arabidopsis thaliana	609	108	9e-23	0.27	0.48	1
CO000140	980	XP_002308739.1	predicted protein	Populus trichocarpa	211	368	e-100	0.97	0.99	1	sp|P49104	RAB2B_MAIZE Ras-related protein Rab-2-B	Zea may	210	361	5e-99	0.94	0.97	1
CO000141	962	XP_002278975.1	PREDICTED: hypothetical protein	Vitis vinifera	310	545	e-153	0.95	0.97	3	sp|O24412	PSD7_ARATH Probable 26S proteasome non-ATPase regulatorysubunit 7	Arabidopsis thaliana	308	521	e-147	0.9	0.96	3
CO000142	993	XP_002285919.1	PREDICTED: hypothetical protein	Vitis vinifera	206	104	2e-20	0.38	0.46	3	sp|Q9XJ56	ECP44_DAUCA Phosphoprotein ECPP44	Daucus carot	258	66.6	3e-10	0.48	0.55	3
CO000143	870	XP_002276462.1	PREDICTED: hypothetical protein	Vitis vinifera	418	306	2e-81	0.8	0.9	3
CO000147	1158	XP_002265940.1	PREDICTED: hypothetical protein	Vitis vinifera	301	465	e-129	0.8	0.85	2	sp|Q6UNT2	RL5_CUCSA 60S ribosomal protein L5	Cucumis sativu	302	457	e-128	0.78	0.85	2
CO000149	1338	XP_002327494.1	predicted protein	Populus trichocarpa	703	629	e-178	0.83	0.85	2	sp|P51819	HSP83_IPONI Heat shock protein 83	Ipomoea nil	703	618	e-176	0.83	0.85	2
CO000150	912	EEF46080.1	conserved hypothetical protein	Ricinus communis	495	288	7e-76	0.67	0.77	1	sp|P57681	PCYOX_ARATH Probable prenylcysteine oxidase	Arabidopsis thaliana	500	232	3e-60	0.55	0.68	1
CO000155	411	ABK94181.1	unknown	Populus trichocarpa	67	68.2	3e-10	0.6	0.74	3
CO000156	1153	XP_002276692.1	PREDICTED: hypothetical protein	Vitis vinifera	223	254	2e-65	0.8	0.88	3	sp|Q9LMK7	RBP1A_ARATH Ran-binding protein 1 homolog a	Arabidopsis thaliana	228	236	3e-61	0.72	0.83	3
CO000158	1058	CAO44184.1	unnamed protein product	Vitis vinifera	241	435	e-120	0.9	0.92	1	sp|P41917	RAN2_ARATH GTP-binding nuclear protein Ran-2	Arabidopsis thaliana	221	428	e-119	0.91	0.92	1
CO000161	805	XP_002267566.1	PREDICTED: hypothetical protein	Vitis vinifera	596	168	5e-40	0.6	0.71	1
CO000165	1089	XP_002307854.1	predicted protein	Populus trichocarpa	201	191	1e-46	0.5	0.66	3
CO000166	576	ACJ84132.1	unknown	Medicago truncatula	86	159	1e-37	0.88	0.88	3	sp|Q9M2F1	RS272_ARATH 40S ribosomal protein S27-2	Arabidopsisthaliana	86	155	2e-37	0.83	0.88	3
CO000167	864	XP_002309260.1	predicted protein	Populus trichocarpa	246	343	2e-92	0.71	0.78	1
CO000169	1190	ABK95689.1	unknown	Populus trichocarpa	372	287	2e-75	0.48	0.56	2
CO000172	1704	XP_002273358.1	PREDICTED: hypothetical protein	Vitis vinifera	485	554	e-156	0.72	0.86	3	sp|Q70E96	AL3F1_ARATH Aldehyde dehydrogenase family 3 member F1	Arabidopsis thaliana	484	482	e-135	0.62	0.78	3
CO000175	788	XP_002326765.1	predicted protein	Populus trichocarpa	127	99.4	3e-19	0.54	0.74	2
CO000177	872	XP_002284989.1	PREDICTED: hypothetical protein isoform 1	Vitis vinifera	245	311	e-109	0.94	0.98	2	sp|Q7DLR9	PSB4_ARATH Proteasome subunit beta type-4	Arabidopsisthaliana	246	292	e-106	0.86	0.95	2
CO000178	1601	EEC71666.1	hypothetical protein OsI_04129	Oryza sativa Indica Group	496	840	0	0.95	0.96	1	sp|Q41783	TBB6_MAIZE Tubulin beta-6 chain	Zea mays	446	838	0	0.95	0.96	1
CO000179	771	XP_002284543.1	PREDICTED: hypothetical protein	Vitis vinifera	862	256	2e-66	0.53	0.63	1	sp|Q94JM3	ARFB_ARATH Auxin response factor 2	Arabidopsis thalian	859	180	8e-45	0.54	0.67	1
CO000180	510	XP_002325421.1	predicted protein	Populus trichocarpa	59	63.9	6e-09	0.61	0.69	1
CO000185	1126	XP_002282119.1	PREDICTED: similar to polyubiquitin	Vitis vinifera	761	590	e-167	1	1	2	sp|Q3E7T8	UBQ14_ARATH Polyubiquitin 14	Arabidopsis thalian	305	590	e-168	1	1	2
CO000188	617	EEF31021.1	conserved hypothetical protein	Ricinus communis	57	117	9e-25	0.91	0.94	1
CO000189	921	XP_002272642.1	PREDICTED: hypothetical protein	Vitis vinifera	213	107	2e-21	0.41	0.57	1
CO000191	895	ABO31374.1	unknown	Gossypium hirsutum	254	369	e-100	0.82	0.82	2
CO000196	607	XP_002282071.1	PREDICTED: similar to ubiquitin fusion protein	Vitis vinifera	128	259	1e-67	1	1	3	sp|P49636	RL40_NICSY Ubiquitin-60S ribosomal protein L40	Nicotiana sylvestris	128	258	3e-68	0.99	1	3
CO000197	854	XP_002273286.1	PREDICTED: hypothetical protein	Vitis vinifera	196	197	8e-49	0.96	0.96	3	sp|Q9LTF2	RS103_ARATH 40S ribosomal protein S10-3	Arabidopsisthaliana	179	179	3e-44	0.86	0.94	3
CO000198	1274	XP_002315231.1	predicted protein	Populus trichocarpa	346	620	e-176	0.89	0.92	3	sp|Q5PQX0	UXS1_RAT UDP-glucuronic acid decarboxylase 1	Rattusnorvegicus	420	408	e-113	0.64	0.78	3
CO000199	1052	XP_002310303.1	predicted protein	Populus trichocarpa	260	504	e-141	0.95	0.98	2	sp|Q42064	RL83_ARATH 60S ribosomal protein L8-3	Arabidopsisthaliana	258	502	e-141	0.94	0.99	2
CO000204	1549	XP_002276890.1	PREDICTED: hypothetical protein isoform 2	Vitis vinifera	1042	773	0	0.84	0.87	3	sp|Q9SWW6	CESA7_ARATH Cellulose synthase A catalytic subunit 7[UDP-forming]	Arabidopsis thaliana	1026	767	0	0.83	0.87	3
CO000205	942	XP_002276048.1	PREDICTED: hypothetical protein	Vitis vinifera	485	304	e-111	0.88	0.94	2	sp|O64765	UAP1_ARATH Probable UDP-N-acetylglucosaminepyrophosphorylase	Arabidopsis thaliana	502	282	3e-75	0.81	0.9	2
CO000214	1398	ABK96406.1	unknown	Populus trichocarpa x Populus deltoides	358	625	e-177	0.9	0.93	1	sp|P17784	ALF_ORYSJ Fructose-bisphosphate aldolase cytoplasmicisozyme	Oryza sativa subsp. japonica	358	588	e-167	0.84	0.9	1
CO000215	837	XP_002284068.1	PREDICTED: hypothetical protein isoform 2	Vitis vinifera	157	320	1e-85	0.96	0.99	2	sp|Q8LGF7	PEX4_ARATH Protein PEROXIN-4	Arabidopsis thalian	157	314	5e-85	0.94	0.98	2
CO000220	1355	XP_002283057.1	PREDICTED: hypothetical protein isoform 3	Vitis vinifera	172	275	8e-72	0.73	0.84	3	sp|A3BDI8	SAP8_ORYSJ Zinc finger A20 and AN1 domain-containingstress-associated protein 8	Oryza sativa subsp.japonica	171	242	4e-63	0.67	0.78	3
CO000221	736	XP_002282139.1	PREDICTED: hypothetical protein	Vitis vinifera	438	236	1e-60	0.92	0.97	2	sp|Q8BUV8	GP107_MOUSE Protein GPR107	Mus musculus	551	125	4e-28	0.49	0.71	2
CO000222	560	CAO66154.1	unnamed protein product	Vitis vinifera	105	141	3e-32	0.75	0.85	3	sp|Q6TAW2	SERP2_MOUSE Stress-associated endoplasmic reticulumprotein 2	Mus musculus	65	58.2	3e-08	0.52	0.69	3
CO000223	1763	ABK94105.1	unknown	Populus trichocarpa	499	351	e-173	0.6	0.72	3	sp|Q766C3	NEP1_NEPGR Aspartic proteinase nepenthesin-1	Nepenthesgracilis	437	137	5e-59	0.4	0.53	3
CO000227	915	XP_002283057.1	PREDICTED: hypothetical protein isoform 3	Vitis vinifera	172	262	4e-68	0.72	0.77	2	sp|A3BDI8	SAP8_ORYSJ Zinc finger A20 and AN1 domain-containingstress-associated protein 8	Oryza sativa subsp.japonica	171	218	5e-56	0.64	0.71	2
CO000232	645	EEF32263.1	conserved hypothetical protein	Ricinus communis	81	148	4e-34	0.85	0.92	3
CO000235	638	XP_002280639.1	PREDICTED: hypothetical protein	Vitis vinifera	109	192	3e-47	0.84	0.91	1	sp|Q9LUV2	POP3_ARATH Probable protein Pop3	Arabidopsis thalian	109	186	1e-46	0.82	0.88	1
CO000239	583	XP_002283422.1	PREDICTED: hypothetical protein	Vitis vinifera	107	134	6e-30	0.89	0.97	1	sp|O74847	YCYB_SCHPO UPF0041 protein C1235.11	Schizosaccharomyces pombe	141	72	2e-12	0.63	0.79	1
CO000246	896	ABK96664.1	unknown	Populus trichocarpa x Populus deltoides	189	230	2e-58	0.62	0.73	2	sp|O94581	COX12_SCHPO Cytochrome c oxidase subunit 6B	Schizosaccharomyces pombe	86	105	6e-22	0.54	0.67	2
CO000247	506	XP_002327192.1	predicted protein	Populus trichocarpa	88	136	7e-31	0.82	0.92	1	sp|Q948Z4	SNAK1_SOLTU Snakin-1	Solanum tuberosum	88	131	2e-30	0.77	0.89	1
CO000248	913	ABK93941.1	unknown	Populus trichocarpa	180	197	9e-49	0.97	1	2	sp|Q9LTF2	RS103_ARATH 40S ribosomal protein S10-3	Arabidopsisthaliana	179	179	3e-44	0.86	0.94	2
CO000250	1134	XP_002302480.1	predicted protein	Populus trichocarpa	199	345	4e-93	0.87	0.93	2	sp|O04905	UMPK_ARATH Uridylate kinase	Arabidopsis thalian	202	331	5e-90	0.8	0.88	2
CO000251	896	EEF31218.1	conserved hypothetical protein	Ricinus communis	158	223	3e-56	0.71	0.77	2
CO000253	1296	XP_002272389.1	PREDICTED: hypothetical protein	Vitis vinifera	509	244	2e-62	0.41	0.48	2
CO000255	832	EEF50677.1	conserved hypothetical protein	Ricinus communis	256	379	e-103	0.81	0.88	3
CO000256	990	EEF51268.1	conserved hypothetical protein	Ricinus communis	260	311	6e-83	0.65	0.71	3	sp|Q9SUR3	RTNLA_ARATH Reticulon-like protein B1	Arabidopsisthaliana	275	256	2e-67	0.6	0.7	3
CO000262	1765	XP_002274863.1	PREDICTED: hypothetical protein	Vitis vinifera	535	875	0	0.81	0.91	3	sp|Q8S528	AL2B7_ARATH Aldehyde dehydrogenase family 2 member B7,mitochondrial	Arabidopsis thaliana	534	822	0	0.77	0.9	3
CO000263	535	XP_002310323.1	predicted protein	Populus trichocarpa	101	150	4e-35	0.69	0.8	2
CO000265	872	EEF43333.1	conserved hypothetical protein	Ricinus communis	281	424	e-117	0.79	0.88	2	sp|A7SGU6	PSMG2_NEMVE Proteasome assembly chaperone 2	Nematostella vectensis	244	108	5e-23	0.33	0.49	2
CO000266	933	XP_002263156.1	PREDICTED: hypothetical protein	Vitis vinifera	416	457	e-127	0.73	0.77	2	sp|Q04960	DNJH_CUCSA DnaJ protein homolog	Cucumis sativu	413	439	e-122	0.73	0.75	2
CO000267	1090	XP_002318327.1	predicted protein	Populus trichocarpa	501	438	e-121	0.72	0.85	1	sp|P54767	DCE_SOLLC Glutamate decarboxylase	Solanum lycopersicu	502	417	e-116	0.69	0.82	1
CO000268	721	XP_002327030.1	predicted protein	Populus trichocarpa	192	148	4e-34	0.68	0.81	2	sp|Q41001	BCP_PEA Blue copper protein	Pisum sativum	189	115	2e-25	0.54	0.68	2
CO000275	908	CAO15922.1	unnamed protein product	Vitis vinifera	377	327	1e-87	0.79	0.86	2
CO000276	839	YP_002085158.1	hypothetical protein PACG_05330	Pseudomonas aeruginosa C3719	309	271	7e-71	0.8	0.89	2
CO000277	822	XP_002303380.1	predicted protein	Populus trichocarpa	247	108	5e-22	0.75	0.88	-1	sp|Q9LD45	BI1_ARATH Bax inhibitor 1	Arabidopsis thaliana	247	107	1e-22	0.79	0.92	-1
CO000279	1340	XP_002278444.1	PREDICTED: hypothetical protein	Vitis vinifera	383	698	0	0.88	0.94	3	sp|Q07511	FDH_SOLTU Formate dehydrogenase, mitochondrial	Solanumtuberosum	381	674	0	0.86	0.92	3
CO000281	1120	CAO39742.1	unnamed protein product	Vitis vinifera	435	208	e-118	0.71	0.89	2	sp|Q68EX9	CHID1_XENLA Chitinase domain-containing protein 1	Xenopus laevis	393	108	9e-38	0.42	0.65	1
CO000284	583	XP_002278997.1	PREDICTED: hypothetical protein	Vitis vinifera	1081	263	7e-69	0.9	0.9	1	sp|Q84ZN6	CESA8_ORYSJ Probable cellulose synthase A catalytic subunit8 [UDP-forming]	Oryza sativa subsp. japonica	1081	257	4e-68	0.87	0.89	1
CO000286	924	EEF37134.1	conserved hypothetical protein	Ricinus communis	247	365	3e-99	0.69	0.79	1
CO000291	900	YP_002875593.1	hypothetical protein PFLU6111	Pseudomonas fluorescens SBW25	1934	540	e-152	0.95	0.98	-3	sp|Q9CMZ1	Y659_PASMU UPF0192 protein PM0659	Pasteurella multocid	1905	238	3e-62	0.41	0.62	-3
CO000298	1873	CAN70790.1	hypothetical protein	Vitis vinifera	126	146	7e-33	0.92	0.92	2
CO000299	888	XP_002283405.1	PREDICTED: hypothetical protein	Vitis vinifera	697	270	1e-70	0.57	0.65	1
CO000300	796	EEF47481.1	protein with unknown function	Ricinus communis	1086	294	6e-78	0.83	0.86	1	sp|P51413	RL172_ARATH 60S ribosomal protein L17-2	Arabidopsisthaliana	175	273	8e-73	0.8	0.85	1
CO000305	888	XP_002323253.1	predicted protein	Populus trichocarpa	349	290	1e-76	0.62	0.74	2	sp|P94111	STS1_ARATH Strictosidine synthase 1	Arabidopsisthaliana	335	129	2e-29	0.37	0.53	2
CO000306	855	XP_002284698.1	PREDICTED: hypothetical protein	Vitis vinifera	326	261	8e-68	0.51	0.63	3
CO000308	447	XP_002466535.1	hypothetical protein SORBIDRAFT_01g009570	Sorghum bicolor	452	76.6	7e-13	1	1	1	sp|Q9ZRB7	TBA_WHEAT Tubulin alpha chain	Triticum aestivu	451	76.6	5e-14	1	1	1
CO000312	1004	XP_001676261.1	Hypothetical protein CBG17156	Caenorhabditis briggsae AF16	376	63.2	4e-08	0.25	0.45	3	sp|P40631	MLH_TETTH Micronuclear linker histone polyprotein	Tetrahymena thermophila	633	53.5	2e-06	0.25	0.48	3
CO000314	832	CAO61841.1	unnamed protein product	Vitis vinifera	142	221	5e-56	0.98	0.99	1	sp|P56331	IF1A_ONOVI Eukaryotic translation initiation factor 1A	Onobrychis viciifolia	145	207	9e-53	0.92	0.95	1
CO000319	1315	XP_002304855.1	predicted protein	Populus trichocarpa	299	552	e-155	0.9	0.95	2	sp|P0C582	M2OM_NEUCR Putative mitochondrial 2-oxoglutarate/malatecarrier protein	Neurospora crassa	331	252	5e-66	0.5	0.63	2
CO000321	789	ABK94515.1	unknown	Populus trichocarpa	236	259	2e-67	0.62	0.71	3	sp|Q9SMB8	THT11_TOBAC Tyramine N-feruloyltransferase 4/11	Nicotiana tabacum	226	115	4e-25	0.32	0.44	3
CO000322	848	XP_002281940.1	PREDICTED: hypothetical protein	Vitis vinifera	320	270	1e-70	0.62	0.77	1	sp|A8N6B4	MKAR_COPC7 3-ketoacyl-CoA reductase	Coprinopsiscinerea (strain Okayama-7 / 130 / FGSC 9003	339	122	3e-27	0.36	0.54	1
CO000326	1158	XP_002270031.1	PREDICTED: hypothetical protein	Vitis vinifera	333	221	3e-59	0.47	0.54	2	sp|O80928	DOF24_ARATH Dof zinc finger protein DOF2.4	Arabidopsisthaliana	330	153	2e-36	0.59	0.65	2
CO000327	697	XP_002274381.1	PREDICTED: hypothetical protein	Vitis vinifera	150	237	8e-61	0.87	0.89	2	sp|O22584	RS14_LUPLU 40S ribosomal protein S14	Lupinus luteu	150	227	5e-59	0.84	0.87	2
CO000330	1159	ACJ85516.1	unknown	Medicago truncatula	267	422	e-116	0.79	0.85	2	sp|Q9SGW3	RP12A_ARATH 26S proteasome non-ATPase regulatory subunitRPN12A	Arabidopsis thaliana	267	396	e-109	0.74	0.83	2
CO000332	808	XP_002329018.1	predicted protein	Populus trichocarpa	591	478	e-133	0.81	0.94	1	sp|Q9S746	HTH_ARATH Protein HOTHEAD	Arabidopsis thaliana	594	389	e-107	0.69	0.81	1
CO000336	659	XP_002285101.1	PREDICTED: hypothetical protein	Vitis vinifera	144	280	1e-73	0.97	0.99	2	sp|P46293	RS16_GOSHI 40S ribosomal protein S16	Gossypiumhirsutum	145	277	5e-74	0.96	0.97	2
CO000338	896	XP_002309175.1	predicted protein	Populus trichocarpa	477	421	e-116	0.79	0.86	1	sp|Q94AL9	AGT22_ARATH Alanine--glyoxylate aminotransferase 2homolog 2, mitochondrial	Arabidopsis thaliana	477	386	e-106	0.73	0.87	1
CO000341	782	ABK96305.1	unknown	Populus trichocarpa x Populus deltoides	221	380	e-104	0.87	0.95	3
CO000344	1066	XP_002272348.1	PREDICTED: hypothetical protein	Vitis vinifera	394	449	e-124	0.69	0.77	2	sp|Q8VZ49	ADHL4_ARATH Alcohol dehydrogenase-like 4	Arabidopsisthaliana	380	424	e-118	0.64	0.77	2
CO000346	1391	XP_002452705.1	hypothetical protein SORBIDRAFT_04g031060	Sorghum bicolor	459	714	0	0.99	1	1	sp|P0CH32	UBQ4_ARATH Polyubiquitin 4	Arabidopsis thaliana	382	714	0	0.99	1	1
CO000348	1013	XP_002270699.1	PREDICTED: hypothetical protein	Vitis vinifera	200	340	1e-91	0.87	0.88	1	sp|P29687	RAB5_TOBAC Ras-related protein Rab5	Nicotiana tabacu	200	221	8e-57	0.62	0.8	1
CO000350	560	YP_173374.1	hypothetical protein NitaMp027	Nicotiana tabacum	138	153	9e-36	0.96	0.97	-2	sp|P93276	M030_ARATH Uncharacterized mitochondrial proteinAtMg00030	Arabidopsis thaliana	107	109	1e-23	0.98	0.98	-2
CO000351	212	YP_003001409.1	hypothetical protein B21_03675	Escherichia coli BL21	251	137	3e-31	1	1	-2	sp|Q3YVD2	UBIE_SHISS Ubiquinone/menaquinone biosynthesismethyltransferase ubiE	Shigella sonnei (strain Ss046	251	137	2e-32	1	1	-2
CO000354	960	XP_002298022.1	predicted protein	Populus trichocarpa	226	301	8e-80	0.68	0.78	3
[truncated: 699 more rows]
