# Supplementary material for: Generation, Annotation and Analysis of First Large-Scale Expressed Sequence Tags from Developing Fiber of Gossypium barbadense L
Source: PLoS One. 2011 Jul 28;6(7):e22758. doi: 10.1371/journal.pone.0022758 (PMC3145671; doi:10.1371/journal.pone.0022758)
Supplement: Table S8 — Species distribution of unknown function proteins that have the best similarity with 2697 G. barbadense unigenes. (XLS) [file pone.0022758.s012.xls]

## Sheet: TableS8_Unknown_Species_Sta
Organism	Seq_count	Percentage
Vitis vinifera	1094	40.56
Populus trichocarpa	1014	37.6
Ricinus communis	336	12.46
Medicago truncatula	38	1.41
Pseudomonas fluorescens SBW25	33	1.22
Arabidopsis thaliana	33	1.22
Sorghum bicolor	22	0.82
Oryza sativa	17	0.63
Populus trichocarpa x Populus deltoides	13	0.48
Picea sitchensis	8	0.3
Bordetella petrii DSM 12804	8	0.3
Zea mays	6	0.22
Solanum tuberosum	5	0.19
Pseudomonas fluorescens Pf-5	5	0.19
Gossypium hirsutum	4	0.15
Pseudomonas fluorescens Pf0-1	3	0.11
Bordetella parapertussis 12822	3	0.11
Rattus norvegicus	2	0.07
Ralstonia metallidurans CH34	2	0.07
Pseudomonas aeruginosa 2192	2	0.07
Nicotiana tabacum	2	0.07
Monodelphis domestica	2	0.07
Moniliophthora perniciosa FA553	2	0.07
Ipomoea trifida	2	0.07
Trifolium pratense	1	0.04
Tribolium castaneum	1	0.04
Ralstonia solanacearum MolK2	1	0.04
Ralstonia solanacearum GMI1000	1	0.04
Ralstonia eutropha JMP134	1	0.04
Pseudomonas syringae pv.phaseolicola 1448A	1	0.04
Pseudomonas syringae pv. oryzaestr. 1_6	1	0.04
Pseudomonas marginalis pv. alfalfae	1	0.04
Pseudomonas aeruginosa UCBPP-PA14	1	0.04
Pseudomonas aeruginosa LESB58	1	0.04
Pseudomonas aeruginosa C3719	1	0.04
Prunus persica	1	0.04
Physcomitrella patens subsp. patens	1	0.04
Pelargonium x hortorum	1	0.04
Panax quinquefolius	1	0.04
Ornithorhynchusanatinus	1	0.04
Mus musculus	1	0.04
Micromonas pusilla CCMP1545	1	0.04
Mariprofundus ferrooxydans PV-1	1	0.04
Litchi chinensis	1	0.04
Hydra magnipapillata	1	0.04
Escherichia colistr. K-12 substr. MG1655	1	0.04
Escherichia coli BL21	1	0.04
Enterobacter sp. 638	1	0.04
Diaphorobacter sp. TPSY	1	0.04
Delftia acidovorans SPH-1	1	0.04
Davidia involucrata	1	0.04
Cupriavidus taiwanensis	1	0.04
Cleome spinosa	1	0.04
Catenulispora acidiphila DSM44928	1	0.04
Caenorhabditis briggsae AF16	1	0.04
Burkholderia ubonensis Bu	1	0.04
Burkholderia sp. 383	1	0.04
Burkholderia cenocepacia J2315	1	0.04
Brevibacillus brevis NBRC 100599	1	0.04
Brassica juncea var. tumida	1	0.04
Bordetella bronchiseptica RB50	1	0.04
Bordetella avium 197N	1	0.04
Bacillus cereus Rock1-15	1	0.04
Azorhizobium caulinodans ORS 571	1	0.04
Aurantimonas sp. SI85-9A1	1	0.04
