# Supplementary material for: Generation, Annotation and Analysis of First Large-Scale Expressed Sequence Tags from Developing Fiber of Gossypium barbadense L
Source: PLoS One. 2011 Jul 28;6(7):e22758. doi: 10.1371/journal.pone.0022758 (PMC3145671; doi:10.1371/journal.pone.0022758)
Supplement: Table S9 — Details of best blastn result against nt with E-value≤10−5. 990 sequences with no blastx hits were searched for similarities at the nucleotide level (non-redundant nucleotide sequence nt database in GenBank). 205 sequences shared homology with the genes registered in the NCBI nt database. (XLS) [file pone.0022758.s013.xls]

## Sheet: TableS9_Hits
Query	Q_Length	Subject	S_Length	Score_Bits	Score	E_Value	Identities	Identities	Identities	Positives	Positives	Positives	Gaps	Gaps	Gaps	Frame
CO000148	523	gb|EF095707.1| Gossypium hirsutum proline-rich protein (PRP6) mRNA, complete cds	777	91.7	46	4e-15	49	50	0.98			%				Plus / Minus
CO000153	1037	gb|L17308.1|COTCWPPR Gossypium hirsutum proline-rich cell wall protein mRNA, completecds	911	829	418	0	421	422	0.99			%				Plus / Plus
CO000219	476	emb|X75423.1| G.hirsutum mRNA for ribosomal protein 41, large subunit (RL41)	449	767	387	0	422	431	0.97	2	431	0				Plus / Plus
CO000231	919	gb|FJ600363.1| Gossypium hirsutum H6-like protein (H6L) mRNA, complete cds	960	852	430	0	430	430	1			%				Plus / Plus
CO000259	573	gb|AF531367.1| Gossypium barbadense fiber protein Fb7 mRNA, complete cds	588	597	301	e-167	301	301	1			%				Plus / Plus
CO000320	244	emb|CU367668.1| Aphanomyces euteiches cDNA	235	466	235	e-128	235	235	1			%				Plus / Plus
CO000440	395	gb|DQ174251.1| Gossypium hirsutum translation elongation factor 1A-2 (EF1A2) mRNA,complete cds	1566	75.8	38	2e-10	38	38	1			%				Plus / Plus
CO000448	716	gb|GQ393436.1| Gossypium hirsutum cultivar Deltapine 33 B clone MONCS0401 SSRmarker CGR5362 genomic sequence	255	319	161	1e-83	221	244	0.9	14	244	0.05				Plus / Minus
CO000472	614	gb|AY464064.1| Gossypium hirsutum clone ON035C9 mRNA sequence	548	791	399	0	408	411	0.99			%				Plus / Plus
CO000474	787	ref|NM_001177011.1| Zea mays ascorbate peroxidase (POD), mRNAgb|FJ890983.1| Zea mays ascorbate peroxidase (POD) mRNA, complete cds	1057	182	92	2e-42	101	104	0.97			%				Plus / Plus
CO000604	570	gb|EF095704.1| Gossypium hirsutum proline-rich protein (PRP3) mRNA, complete cds	726	408	206	e-110	259	277	0.93	6	277	0.02				Plus / Plus
CO000619	527	gb|GQ386898.1| Jatropha curcas(麻疯树) clone JcrRL_ASP0057 hypothetical protein mRNA,partial cds	506	121	61	5e-24	131	151	0.86	5	151	0.03				Plus / Minus
CO000623	344	emb|CU367701.1| Aphanomyces euteiches cDNA	337	652	329	0	335	337	0.99			%				Plus / Plus
CO000676	284	gb|EU001741.1| Gossypium hirsutum beta-ketoacyl-CoA synthase (KCS2) mRNA, completecds	2013	394	199	e-106	211	215	0.98			%				Plus / Plus
CO000699	235	ref|XM_002275058.1| PREDICTED: Vitis vinifera hypothetical protein LOC100257178(LOC100257178), mRNA	1081	65.9	33	1e-07	36	37	0.97			%				Plus / Plus
CO000728	212	gb|EF151301.1| Gossypium hirsutum alpha-tubulin (TUA5) mRNA, complete cds	1673	311	157	9e-82	160	161	0.99			%				Plus / Plus
CO000829	386	emb|CU367429.1| Aphanomyces euteiches cDNA	850	765	386	0	386	386	1			%				Plus / Plus
CO000869	270	gb|EU626444.1| Gossypium arboreum clone BAC 271C22, complete sequence	85527	414	209	e-112	254	269	0.94			%				Plus / Minus
CO000958	777	ref|XM_002323540.1| Populus trichocarpa predicted protein, mRNA	1229	69.9	35	2e-08	44	47	0.93			%				Plus / Plus
CO000987	633	gb|GQ386898.1| Jatropha curcas clone JcrRL_ASP0057 hypothetical protein mRNA,partial cds	506	143	72	2e-30	107	116	0.92	2	116	0.01				Plus / Minus
CO000997	788	ref|XM_002328885.1| Populus trichocarpa predicted protein, mRNA	730	65.9	33	4e-07	45	49	0.91			%				Plus / Plus
CO001008	1204	dbj|AK245852.1| Glycine max cDNA, clone: GMFL01-43-F24	1427	69.9	35	4e-08	50	55	0.9			%				Plus / Plus
CO001034	867	emb|CU367530.1| Aphanomyces euteiches cDNA	832	1649	832	0	832	832	1			%				Plus / Plus
CO001088	622	emb|AJ567233.1| Gossypium hirsutum microsatellite DNA mGhCIR289, clone CIR289	239	196	99	1e-46	132	146	0.9	2	146	0.01				Plus / Plus
CO001190	885	emb|CT573215.2| Medicago truncatula chromosome 5 clone mth2-51h23, COMPLETE SEQUENCE	121342	61.9	31	6e-06	37	39	0.94			%				Plus / Minus
CO001196	521	gb|AF531367.1| Gossypium barbadense fiber protein Fb7 mRNA, complete cds	588	65.9	33	2e-07	146	183	0.79	3	183	0.01				Plus / Plus
CO001228	266	emb|AJ304443.1| Pseudomonas fluorescens pc-plc gene forphosphatidylcholine-hydrolyzing phospholipase C	3768	81.8	41	2e-12	50	53	0.94			%				Plus / Minus
CO001264	477	emb|CU367368.1| Aphanomyces euteiches cDNA	475	926	467	0	474	475	0.99	1	475	0				Plus / Plus
CO001291	239	gb|EF672627.1| Gossypium hirsutum fasciclin-like arabinogalactan protein 1 (FLA1)mRNA, complete cds	1013	159	80	9e-36	113	127	0.88	1	127	0				Plus / Plus
CO001299	420	gb|EF672640.1| Gossypium hirsutum fasciclin-like arabinogalactan protein 14 (FLA14)mRNA, complete cds	1380	133	67	1e-27	70	71	0.98			%				Plus / Plus
CO001375	353	gb|EF145265.1| Populus trichocarpa clone WS01122_I02 unknown mRNA	597	67.9	34	4e-08	73	86	0.84			%				Plus / Plus
CO001433	291	gb|AY171099.1| Gossypium hirsutum cysteine protease mRNA, complete cds	1741	236	119	6e-59	122	123	0.99			%				Plus / Plus
CO001447	390	gb|GQ394637.1| Gossypium hirsutum cultivar Deltapine 90 clone MONCS1660 SSR markerDC40140 genomic sequence	255	155	78	2e-34	87	90	0.96			%				Plus / Plus
CO001453	205	gb|FJ915120.1| Gossypium hirsutum vacuolar invertase mRNA, complete cds	2163	167	84	3e-38	84	84	1			%				Plus / Plus
CO001476	362	ref|XM_002336869.1| Populus trichocarpa predicted protein, mRNA	683	85.7	43	2e-13	78	89	0.87	3	89	0.03				Plus / Plus
CO001483	164	gb|AY038061.1| Gossypium hirsutum 3-ketoacyl-CoA thiolase mRNA, complete cds	640	254	128	1e-64	137	140	0.97			%				Plus / Plus
23-G12	288	gb|HP013829.1| TSA: Arachis duranensis DurSNP_c13841.Ardu mRNA sequence	501	67.9	34	3e-08	43	46	0.93			%				Plus / Plus
23-H07	170	dbj|AK326539.1| Solanum lycopersicum cDNA, clone: LEFL2009E19, HTC in fruit	2209	65.9	33	7e-08	51	57	0.89			%				Plus / Plus
23-J17	246	emb|AJ567100.1| Gossypium hirsutum microsatellite DNA mGhCIR152, clone CIR152	476	190	96	3e-45	115	124	0.92			%				Plus / Plus
01-I07	373	ref|XM_002313339.1| Populus trichocarpa predicted protein, mRNA	752	85.7	43	2e-13	100	119	0.84			%				Plus / Plus
01-L24	117	gb|EU085042.1| Gossypium hirsutum CBL2 (CBL2) gene, complete cds	2008	63.9	32	2e-07	41	44	0.93			%				Plus / Minus
01-P02	356	emb|CU367782.1| Aphanomyces euteiches cDNA	355	674	340	0	340	340	1			%				Plus / Plus
02-A10	346	gb|AY857412.1| Suberites domuncula P2 mRNA, complete cds	336	73.8	37	6e-10	49	53	0.92			%				Plus / Plus
02-F21	236	ref|XM_002307155.1| Populus trichocarpa predicted protein, mRNA	679	71.9	36	2e-09	39	40	0.97			%				Plus / Minus
02-G14	212	gb|EF672627.1| Gossypium hirsutum fasciclin-like arabinogalactan protein 1 (FLA1)mRNA, complete cds	1013	139	70	8e-30	96	109	0.88			%				Plus / Plus
02-H08	129	emb|AM181176.4| Pseudomonas fluorescens SBW25 complete genome	6722539	71.9	36	8e-10	36	36	1			%				Plus / Minus
02-J11	166	gb|AY464062.1| Gossypium hirsutum clone ON033M19 mRNA sequence	748	73.8	37	3e-10	47	49	0.95	1	49	0.02				Plus / Plus
02-O04	100	gb|U34401.1|GBU34401 Gossypium barbadense FbLate-2 gene, complete cds	1699	151	76	8e-34	92	100	0.92			%				Plus / Plus
03-A06	625	gb|GQ393698.1| Gossypium hirsutum cultivar Deltapine 33 B clone MONCS0663 SSRmarker CGR5725 genomic sequence	255	184	93	5e-43	96	97	0.98			%				Plus / Minus
03-C09	517	gb|GQ393436.1| Gossypium hirsutum cultivar Deltapine 33 B clone MONCS0401 SSRmarker CGR5362 genomic sequence	255	462	233	e-126	242	245	0.98			%				Plus / Plus
03-G23	844	gb|HP001378.1| TSA: Arachis duranensis DurSNP_c1380.Ardu mRNA sequence	912	71.9	36	6e-09	63	72	0.87			%				Plus / Plus
03-I08	621	gb|AC216451.1| Populus trichocarpa clone POP015-O07, complete sequence	122739	77.8	39	8e-11	57	63	0.9			%				Plus / Minus
03-J02	110	gb|DQ174257.1| Gossypium hirsutum translation elongation factor 1A-8 (EF1A8) mRNA,complete cds	1555	194	98	7e-47	107	110	0.97			%				Plus / Minus
03-L08	823	gb|GQ478573.2| Carica papaya clone BAC SH18O09, complete sequence	65864	153	77	2e-33	137	157	0.87			%				Plus / Plus
04-D10	858	ref|XM_002519072.1| Ricinus communis ring finger protein, putative, mRNA	1209	87.7	44	1e-13	68	76	0.89			%				Plus / Plus
04-M02	196	ref|XM_002279957.1| PREDICTED: Vitis vinifera hypothetical protein LOC100248713(LOC100248713), mRNA	1932	65.9	33	8e-08	51	57	0.89			%				Plus / Plus
05-P06	882	emb|AJ132636.1| Gossypium hirsutum sad1 gene, exons 1-3	6541	61.9	31	6e-06	43	47	0.91			%				Plus / Minus
06-D03	719	gb|AY570292.1| Gossypium hirsutum clone UBC169-800 restorer (Rf1) gene, partialsequence	807	145	73	4e-31	182	215	0.84	5	215	0.02				Plus / Minus
06-D22	169	gb|HP001023.1| TSA: Arachis duranensis DurSNP_c1024.Ardu mRNA sequence	627	83.8	42	3e-13	63	70	0.9			%				Plus / Plus
06-K06	244	gb|FJ719369.1| Gossypium hirsutum cultivar CRI12 NADPH:cytochrome P450 reductase(CPR2) mRNA, complete cds	2653	379	191	e-102	212	219	0.96			%				Plus / Plus
07-C03	552	gb|DQ345959.1| Gossypium hirsutum cultivar coker 310 FR chloroplast, complete genome	160301	1041	525	0	539	546	0.98			%				Plus / Plus
07-H15	558	gb|EF457753.1| Gossypium hirsutum retrotransposon putative copia, transposonGORGE3-like, retrotransposon putative gypsy, andtransposon putative MuDR, complete sequence; alcoholdehydrogenase A gene, complete cds; transposon copia-likeand myosin pseudogene, complete sequence; putativeFAD-dependent oxidoreductase and putative proteindisulfide isomerase genes, complete cds; retrotransposon,complete s…	195436	192	97	2e-45	273	328	0.83	4	328	0.01				Plus / Minus
07-K24	120	gb|GQ393432.1| Gossypium hirsutum cultivar Deltapine 33 B clone MONCS0397 SSRmarker CGR5355 genomic sequence	255	163	82	3e-37	85	86	0.98			%				Plus / Minus
07-P05	463	gb|AF034266.1|AF034266 Gossypium hirsutum palmitoyl-acyl carrier protein thioesterase(FatB1) mRNA, partial cds	1694	636	321	e-179	432	475	0.9	12	475	0.02				Plus / Plus
08-B19	271	gb|AY375340.1| Gossypium barbadense fiber protein Fb28 mRNA, complete cds	676	163	82	7e-37	82	82	1			%				Plus / Minus
08-D17	649	emb|Z54188.1| G.hirsutum metallothionein-like gene	2961	607	306	e-170	405	434	0.93	13	434	0.02				Plus / Plus
08-M23	240	gb|DQ088156.2| Gossypium hirsutum actin depolymerizing factor (ADF1) mRNA,complete cds	963	466	235	e-128	235	235	1			%				Plus / Plus
08-P04	257	gb|EU373048.1| Gossypium hirsutum gland development related protein 58-like mRNA,complete sequence	1591	379	191	e-102	197	199	0.98			%				Plus / Plus
09-B19	248	gb|GQ393616.1| Gossypium hirsutum cultivar Deltapine 33 B clone MONCS0581 SSRmarker CGR5631 genomic sequence	255	242	122	8e-61	141	145	0.97	3	145	0.02				Plus / Minus
09-G02	582	gb|EF057800.1| Gossypium hirsutum glycine-rich protein (GRP3) mRNA, complete cds	822	127	64	8e-26	121	140	0.86			%				Plus / Plus
09-G07	541	gb|AY632360.1| Gossypium hirsutum BAC 106I22, complete sequence	135862	83.8	42	1e-12	51	54	0.94			%				Plus / Minus
09-G17	107	emb|CU367577.1| Aphanomyces euteiches cDNA	101	196	99	2e-47	99	99	1			%				Plus / Plus
10-B18	180	gb|FJ870998.1| Gossypium hirsutum ATP synthase beta subunit 1 mRNA, complete cds	2241	238	120	9e-60	162	177	0.91	5	177	0.02				Plus / Plus
10-C06	131	emb|CU367528.1| Aphanomyces euteiches cDNA	143	234	118	1e-58	118	118	1			%				Plus / Plus
10-J22	273	gb|AF277673.1| Gossypium hirsutum proline-rich protein-1 (prp1) gene, complete cds	2029	67.9	34	3e-08	37	38	0.97			%				Plus / Minus
10-M01	189	gb|DQ174253.1| Gossypium hirsutum translation elongation factor 1A-4 (EF1A4) mRNA,complete cds	1565	281	142	7e-73	179	190	0.94	1	190	0				Plus / Plus
10-O19	225	gb|EZ231745.1| TSA: Artemisia annua strain Artemis Contig28756.Aylt mRNA sequence	912	75.8	38	1e-10	50	54	0.92			%				Plus / Plus
11-E20	776	gb|GQ393617.1| Gossypium hirsutum cultivar Deltapine 33 B clone MONCS0582 SSRmarker CGR5632 genomic sequence	255	248	125	5e-62	134	137	0.97			%				Plus / Plus
11-F19	146	gb|GQ292791.1| Gossypium hirsutum rhamnose synthase (RHM2) mRNA, complete cds	2497	228	115	7e-57	133	139	0.95			%				Plus / Plus
12-A15	379	gb|EU830971.1| Linum usitatissimum clone LU0020A05 mRNA sequence	517	69.9	35	1e-08	44	47	0.93			%				Plus / Minus
12-C03	307	gb|AF050673.1|AF050673 Gossypium hirsutum vacuolar H+-ATPase catalytic subunit mRNA,complete cds	2378	482	243	e-133	292	307	0.95	1	307	0				Plus / Plus
12-G24	313	ref|XM_002272957.1| PREDICTED: Vitis vinifera hypothetical protein LOC100246008(LOC100246008), mRNA	2041	73.8	37	6e-10	62	69	0.89	1	69	0.01				Plus / Minus
12-H10	761	gb|AY464061.1| Gossypium hirsutum clone ON003F1 mRNA sequence	744	981	495	0	533	546	0.97			%				Plus / Plus
12-J14	157	gb|AY667624.1| Gossypium hirsutum metallothionein-like protein (met-1) mRNA,complete cds	564	170	86	2e-39	95	98	0.96			%				Plus / Plus
13-E13	115	emb|AM902716.1| Bordetella petrii strain DSM 12804, complete genome	5287950	97.6	49	1e-17	58	61	0.95			%				Plus / Plus
13-G15	281	gb|AY667624.1| Gossypium hirsutum metallothionein-like protein (met-1) mRNA,complete cds	564	297	150	2e-77	209	233	0.89	16	233	0.06				Plus / Plus
13-I01	341	ref|XM_002282856.1| PREDICTED: Vitis vinifera hypothetical protein LOC100267740(LOC100267740), mRNA	2821	67.9	34	4e-08	43	46	0.93			%				Plus / Plus
13-L21	278	gb|EU373057.1| Gossypium hirsutum gland development related protein 67-like mRNA,partial sequence	1155	414	209	e-112	242	253	0.95			%				Plus / Plus
13-O10	228	gb|EU431224.1| Carica papaya mitochondrion, complete genome	476890	226	114	5e-56	132	138	0.95			%				Plus / Minus
14-H18	439	gb|GQ393634.1| Gossypium hirsutum cultivar Deltapine 33 B clone MONCS0599 SSRmarker CGR5650 genomic sequence	255	188	95	2e-44	95	95	1			%				Plus / Plus
14-L08	167	gb|GQ292788.1| Gossypium hirsutum UDP-D-glucuronic acid 4-epimerase (GAE2) mRNA,complete cds	1797	254	128	1e-64	154	167	0.92			%				Plus / Plus
14-P16	179	emb|AJ606072.1| Gossypium hirsutum mRNA for putative papain-like cysteine proteinase(paC1 gene), strain Xuzhou 142	1317	329	166	3e-87	166	166	1			%				Plus / Plus
16-C19	271	gb|EU223835.1| Gossypium hirsutum low molecular weight heat shock protein(LMWHSP4) mRNA, complete cds	796	460	232	e-126	232	232	1			%				Plus / Plus
16-D20	222	gb|EU373048.1| Gossypium hirsutum gland development related protein 58-like mRNA,complete sequence	1591	103	52	4e-19	52	52	1			%				Plus / Plus
16-L10	191	dbj|AB067645.1| Pyrus communis(梨群落) PcCL2 mRNA for cellulase2, complete cds	1849	113	57	4e-22	96	109	0.88			%				Plus / Plus
16-L11	249	gb|EF672627.1| Gossypium hirsutum fasciclin-like arabinogalactan protein 1 (FLA1)mRNA, complete cds	1013	97.6	49	3e-17	55	57	0.96			%				Plus / Plus
16-L24	199	gb|EF095705.1| Gossypium hirsutum proline-rich protein (PRP4) mRNA, complete cds	1065	309	156	3e-81	156	156	1			%				Plus / Plus
17-B08	378	gb|AF531368.1| Gossypium barbadense fiber protein Fb8-like mRNA, complete sequence	913	460	232	e-126	232	232	1			%				Plus / Plus
17-B09	375	ref|XM_002279957.1| PREDICTED: Vitis vinifera hypothetical protein LOC100248713(LOC100248713), mRNA	1932	65.9	33	2e-07	63	73	0.86			%				Plus / Plus
17-M06	548	ref|XM_002305737.1| Populus trichocarpa predicted protein, mRNA	1013	89.7	45	2e-14	90	105	0.85			%				Plus / Plus
17-P05	670	ref|XM_002868512.1| Arabidopsis lyrata subsp. lyrata hypothetical protein, mRNA	229	73.8	37	1e-09	46	49	0.93			%				Plus / Plus
18-C09	148	gb|GQ393722.1| Gossypium hirsutum cultivar Deltapine 33 B clone MONCS0687 SSRmarker CGR5759 genomic sequence	255	135	68	8e-29	77	80	0.96			%				Plus / Minus
18-E11	751	dbj|BA000042.1| Nicotiana tabacum mitochondrial DNA, complete genome	430597	107	54	1e-19	70	74	0.94	1	74	0.01				Plus / Plus
18-G04	723	emb|AM181176.4| Pseudomonas fluorescens SBW25 complete genome	6722539	103	52	2e-18	101	116	0.87	1	116	0				Plus / Minus
18-G19	136	emb|CT573326.1| Pseudomonas entomophila str. L48 chromosome,complete sequence	5888780	87.7	44	2e-14	56	60	0.93			%				Plus / Plus
18-I16	558	ref|XM_002315849.1| Populus trichocarpa predicted protein, mRNA	629	71.9	36	4e-09	45	48	0.93			%				Plus / Plus
18-J02	716	gb|EU626444.1| Gossypium arboreum clone BAC 271C22, complete sequence	85527	135	68	4e-28	139	160	0.86	2	160	0.01				Plus / Minus
18-J16	160	gb|AY305735.1| Gossypium hirsutum actin (ACT12) mRNA, complete cds	1632	141	71	1e-30	109	123	0.88	1	123	0				Plus / Plus
18-O15	815	gb|GQ393607.1| Gossypium hirsutum cultivar Deltapine 33 B clone MONCS0572 SSRmarker CGR5619 genomic sequence	255	77.8	39	1e-10	66	75	0.88			%				Plus / Plus
18-P15	280	gb|FJ695500.1| Jatropha curcas chloroplast, complete genome	163856	63.9	32	5e-07	38	40	0.95			%				Plus / Minus
19-D03	110	emb|AM902716.1| Bordetella petrii strain DSM 12804, complete genome	5287950	60	30	3e-06	39	42	0.92			%				Plus / Minus
19-M18	283	gb|AF531368.1| Gossypium barbadense fiber protein Fb8-like mRNA, complete sequence	913	379	191	e-102	248	267	0.92			%				Plus / Plus
20-A02	461	dbj|AK326318.1| Solanum lycopersicum cDNA, clone: LEFL2004G19, HTC in fruit	2280	119	60	2e-23	78	84	0.92			%				Plus / Plus
20-E17	212	gb|AC229605.1| Brassica rapa subsp. pekinensis clone KBrH059N21, complete sequence	131311	65.9	33	9e-08	51	57	0.89			%				Plus / Minus
21-G12	213	dbj|AP006139.1| Lotus japonicus genomic DNA, chromosome 3, clone: LjT02A16, TM0243,complete sequence	86350	73.8	37	4e-10	64	73	0.87			%				Plus / Plus
21-J13	429	gb|BT099318.1| Soybean clone JCVI-FLGm-26L22 unknown mRNA	1643	159	80	2e-35	110	120	0.91			%				Plus / Minus
21-L11	289	ref|XM_002331351.1| Populus trichocarpa predicted protein, mRNA	1446	63.9	32	5e-07	53	60	0.88			%				Plus / Plus
22-A20	571	gb|GQ393607.1| Gossypium hirsutum cultivar Deltapine 33 B clone MONCS0572 SSRmarker CGR5619 genomic sequence	255	115	58	3e-22	76	82	0.92			%				Plus / Plus
22-C18	206	gb|DQ912951.1| Gossypium barbadense EX2 mRNA, complete cds	820	113	57	4e-22	57	57	1			%				Plus / Minus
22-H10	355	gb|DQ908221.1| Gossypium hirsutum clone LIB5327-014-A1-N1-H12_Gh281 microsatellitesequence	609	230	116	5e-57	123	124	0.99	1	124	0				Plus / Minus
22-J08	107	ref|XM_002322494.1| Populus trichocarpa predicted protein, mRNA	1123	75.8	38	4e-11	56	62	0.9			%				Plus / Minus
23-A22	266	ref|XM_002266668.1| PREDICTED: Vitis vinifera hypothetical protein LOC100263259(LOC100263259), mRNA	1801	65.9	33	1e-07	48	53	0.9			%				Plus / Plus
23-B03	447	ref|XM_002315967.1| Populus trichocarpa predicted protein, mRNA	1263	95.6	48	2e-16	57	60	0.95			%				Plus / Plus
23-D06	563	ref|XM_002298604.1| Populus trichocarpa predicted protein, mRNA	1591	71.9	36	4e-09	54	60	0.9			%				Plus / Plus
23-E10	837	gb|DQ908559.1| Gossypium hirsutum clone LIB5327-002-A1-N1-A10_P_S_Gh625microsatellite sequence	719	89.7	45	3e-14	73	81	0.9	1	81	0.01				Plus / Plus
23-N20	661	ref|XM_002270304.1| PREDICTED: Vitis vinifera heterogeneous nuclearribonucleoprotein-like (LOC100232913), mRNA	2698	65.9	33	3e-07	104	127	0.81	3	127	0.02				Plus / Plus
31-A02	150	gb|DQ118240.1| Gossypium hirsutum MAP kinase mRNA, partial cds	1773	246	124	3e-62	137	140	0.97	1	140	0				Plus / Plus
31-A16	426	ref|XM_002280565.1| PREDICTED: Vitis vinifera hypothetical protein LOC100250363(LOC100250363), mRNA	1709	159	80	2e-35	104	112	0.92			%				Plus / Minus
31-D11	355	ref|XM_002283652.1| PREDICTED: Vitis vinifera hypothetical protein LOC100264659(LOC100264659), mRNA	1449	75.8	38	2e-10	53	58	0.91			%				Plus / Plus
31-E03	336	gb|EF190547.1| Gossypium hirsutum MADS-box protein MADS4 mRNA, complete cds	1150	428	216	e-117	228	232	0.98			%				Plus / Plus
31-L02	838	gb|GQ393297.1| Gossypium hirsutum cultivar Deltapine 33 B clone MONCS0262 SSRmarker CGR5172 genomic sequence	255	226	114	2e-55	127	130	0.97	1	130	0				Plus / Plus
31-P22	397	gb|GQ220323.1| Vitis vinifera strain PN40024 mitochondrion, partial genome	339264	672	339	0	382	395	0.96	6	395	0.01				Plus / Plus
32-D06	119	gb|EU001743.1| Gossypium hirsutum trans-2-enoyl-CoA reductase (ECR2) mRNA, completecds	1349	196	99	2e-47	99	99	1			%				Plus / Plus
32-F22	535	emb|AJ567037.1| Gossypium hirsutum microsatellite DNA mGhCIR088, clone CIR088	283	69.9	35	2e-08	55	59	0.93	2	59	0.03				Plus / Minus
32-H15	817	gb|AF387184.1|AF387184 Abutilon theophrasti ribosomal protein L2 (rpl2) mitochondrialpseudogene, partial sequence	457	111	56	7e-21	56	56	1			%				Plus / Plus
32-H17	697	ref|XM_002513907.1| Ricinus communis 40S ribosomal protein S6, putative, mRNA	1037	79.8	40	2e-11	61	68	0.89			%				Plus / Plus
32-L03	703	gb|EZ750739.1| TSA: Arachis hypogaea CL15864Contig1.Arhy mRNA sequence	1396	180	91	8e-42	124	135	0.91	5	135	0.03				Plus / Minus
32-L23	103	gb|AF512540.1| Gossypium hirsutum alpha-expansin precursor (Exp2) gene, complete cds	1659	139	70	3e-30	91	101	0.9			%				Plus / Plus
32-M20	270	ref|XM_002530032.1| Ricinus communis conserved hypothetical protein, mRNA	1677	65.9	33	1e-07	51	57	0.89			%				Plus / Plus
33-C06	190	gb|EF151305.1| Gossypium hirsutum alpha-tubulin (TUA9) mRNA, complete cds	1583	125	63	1e-25	63	63	1			%				Plus / Minus
33-F11	104	gb|EF503623.1| Gossypium hirsutum F-box protein (FB2) mRNA, complete cds	657	184	93	6e-44	93	93	1			%				Plus / Plus
33-I16	342	emb|CU224712.1| Populus EST from leave	404	87.7	44	4e-14	56	60	0.93			%				Plus / Plus
33-M19	646	emb|AJ567233.1| Gossypium hirsutum microsatellite DNA mGhCIR289, clone CIR289	239	190	96	8e-45	138	157	0.87			%				Plus / Plus
34-A09	157	emb|AJ606073.1| Gossypium hirsutum mRNA for cysteine proteinase (cys1 gene), strainXuzhou 142	1416	218	110	7e-54	142	157	0.9			%				Plus / Plus
34-D19	274	emb|BX640443.1| Bordetella bronchiseptica strain RB50, complete genome; segment 7/16	346274	67.9	34	3e-08	49	54	0.9			%				Plus / Minus
34-F14	358	gb|EU284841.1| TSA: Elaeis guineensis EgEfMPOB00026 24 kDa seed maturation proteinmRNA, complete cds	765	71.9	36	3e-09	42	44	0.95			%				Plus / Plus
34-J01	805	ref|XM_002514251.1| Ricinus communis ATP binding protein, putative, mRNA	2136	69.9	35	2e-08	59	67	0.88			%				Plus / Plus
34-L12	455	gb|BT099318.1| Soybean clone JCVI-FLGm-26L22 unknown mRNA	1643	151	76	5e-33	109	120	0.9			%				Plus / Minus
34-O17	656	gb|EU431224.1| Carica papaya mitochondrion, complete genome	476890	61.9	31	5e-06	34	35	0.97			%				Plus / Plus
35-B21	849	ref|XM_001613082.1| Plasmodium vivax SaI-1 Protein kinase domain containing proteinpartial mRNA	9329	63.9	32	2e-06	32	32	1			%				Plus / Minus
35-F04	466	gb|HQ197979.1| Solanum tuberosum clone BAC BC163l15, complete sequence	112500	69.9	35	1e-08	54	59	0.91	1	59	0.01				Plus / Plus
35-K08	230	gb|GQ393436.1| Gossypium hirsutum cultivar Deltapine 33 B clone MONCS0401 SSRmarker CGR5362 genomic sequence	255	115	58	1e-22	67	70	0.95			%				Plus / Plus
35-L07	453	gb|GQ393621.1| Gossypium hirsutum cultivar Deltapine 33 B clone MONCS0586 SSRmarker CGR5637 genomic sequence	255	165	83	3e-37	103	110	0.93	6	110	0.05				Plus / Plus
35-O05	774	gb|AC235178.1| Glycine max strain Williams 82 clone GM_WBb0007I12, complete sequence	162963	61.9	31	6e-06	34	35	0.97			%				Plus / Plus
36-F14	167	emb|AJ608936.1| Gossypium hirsutum mRNA for putative membrane protein (xl3 gene)	889	65.9	33	7e-08	36	37	0.97			%				Plus / Minus
36-I18	165	gb|EF208967.1| Quercus robur clone IGS8 25S ribosomal RNA, partial sequence;25S-18S ribosomal RNA intergenic spacer, completesequence; and 18S ribosomal RNA, partial sequence	4603	246	124	3e-62	127	128	0.99			%				Plus / Minus
36-K16	124	gb|GU937109.1| PiggyBac insertional mutagenesis vector Slingshot-PB, completesequence	15199	60	30	3e-06	30	30	1			%				Plus / Plus
36-L12	120	gb|GU937109.1| PiggyBac insertional mutagenesis vector Slingshot-PB, completesequence	15199	60	30	3e-06	30	30	1			%				Plus / Plus
36-L13	332	ref|XM_002311572.1| Populus trichocarpa chromatin remodeling complex subunit (CHR917),mRNA	3396	87.7	44	4e-14	100	118	0.84	3	118	0.02				Plus / Plus
37-D19	271	gb|GQ393445.1| Gossypium hirsutum cultivar Deltapine 33 B clone MONCS0410 SSRmarker CGR5383 genomic sequence	255	85.7	43	1e-13	46	47	0.97			%				Plus / Plus
37-F05	249	gb|GU171983.1| Ipomoea batatas microsatellite Stv_Ipb_1650 sequence	248	153	77	6e-34	92	95	0.96	2	95	0.02				Plus / Plus
37-I18	135	gb|DQ912955.1| Gossypium barbadense EX6 mRNA, 3' UTR	276	206	104	2e-50	125	135	0.92			%				Plus / Plus
37-M02	153	emb|CU367733.1| Aphanomyces euteiches cDNA	151	291	147	6e-76	150	151	0.99			%				Plus / Plus
37-M20	391	ref|XM_002270200.1| PREDICTED: Vitis vinifera hypothetical protein LOC100244336(LOC100244336), mRNA	1601	71.9	36	3e-09	69	80	0.86			%				Plus / Plus
38-F12	198	gb|FJ870998.1| Gossypium hirsutum ATP synthase beta subunit 1 mRNA, complete cds	2241	337	170	1e-89	189	198	0.95			%				Plus / Plus
38-G08	458	emb|CU367501.1| Aphanomyces euteiches cDNA	449	882	445	0	448	449	0.99			%				Plus / Plus
38-I20	720	ref|XM_002309165.1| Populus trichocarpa predicted protein, mRNA	5063	97.6	49	9e-17	67	73	0.91			%				Plus / Plus
39-B05	698	emb|AM471283.2| Vitis vinifera contig VV78X079260.5, whole genome shotgun sequence	4356	67.9	34	8e-08	49	54	0.9			%				Plus / Plus
39-C21	821	ref|XM_002523060.1| Ricinus communis 60S ribosomal protein L18, putative, mRNA	889	77.8	39	1e-10	48	51	0.94			%				Plus / Minus
39-J24	297	gb|GQ393203.1| Gossypium hirsutum cultivar Deltapine 33 B clone MONCS0168 SSRmarker CGR5035 genomic sequence	255	240	121	4e-60	133	137	0.97			%				Plus / Plus
39-O07	345	emb|AM466687.2| Vitis vinifera contig VV78X115899.4, whole genome shotgun sequence	14033	60	30	1e-05	39	42	0.92			%				Plus / Plus
39-P15	115	gb|GU295068.1| Gossypium hirsutum thiazole biosynthetic enzyme mRNA, complete cds	1329	228	115	5e-57	115	115	1			%				Plus / Plus
39-P24	428	gb|DQ825802.1| Gossypium hirsutum HyPRP2 (HyPRP2) mRNA, complete cds	670	569	287	e-159	334	349	0.95	3	349	0				Plus / Plus
40-F15	142	gb|AY461804.2| Gossypium hirsutum betaine-aldehyde dehydrogenase mRNA, complete cds	1834	129	65	5e-27	114	132	0.86	2	132	0.01				Plus / Plus
40-H03	137	emb|AM902716.1| Bordetella petrii strain DSM 12804, complete genome	5287950	155	78	8e-35	117	130	0.9			%				Plus / Plus
40-J23	143	gb|GQ393299.1| Gossypium hirsutum cultivar Deltapine 33 B clone MONCS0264 SSRmarker CGR5174 genomic sequence	255	121	61	1e-24	89	97	0.91	1	97	0.01				Plus / Minus
40-N23	557	dbj|AP009123.1| Gossypium barbadense chloroplast DNA, complete genome	160317	936	472	0	491	500	0.98			%				Plus / Minus
40-O03	561	emb|AM488283.1| Vitis vinifera, whole genome shotgun sequence, contig VV78X196884.34,clone ENTAV 115	45856	145	73	3e-31	143	165	0.86	4	165	0.02				Plus / Minus
41-B18	517	gb|AC235304.1| Glycine max strain Williams 82 clone GM_WBb0065N07, complete sequence	180956	73.8	37	1e-09	49	53	0.92			%				Plus / Plus
41-E23	625	gb|GQ393272.1| Gossypium hirsutum cultivar Deltapine 33 B clone MONCS0237 SSRmarker CGR5142 genomic sequence	255	236	119	1e-58	128	131	0.97			%				Plus / Plus
41-G13	743	gb|EU431224.1| Carica papaya mitochondrion, complete genome	476890	676	341	0	498	563	0.88	27	563	0.04				Plus / Plus
41-H01	325	gb|AY667624.1| Gossypium hirsutum metallothionein-like protein (met-1) mRNA,complete cds	564	311	157	1e-81	262	304	0.86	21	304	0.06				Plus / Plus
41-H12	147	gb|AF487511.1| Gossypium hirsutum beta-tubulin (TUB1) gene, complete cds	5765	131	66	1e-27	72	74	0.97			%				Plus / Plus
41-L13	352	gb|EF147085.1| Populus trichocarpa clone WS01227_E24	405	133	67	8e-28	144	169	0.85	3	169	0.01				Plus / Plus
41-O15	631	gb|GQ393267.1| Gossypium hirsutum cultivar Deltapine 33 B clone MONCS0232 SSRmarker CGR5137 genomic sequence	255	73.8	37	1e-09	46	49	0.93			%				Plus / Plus
41-P18	504	gb|AC238632.1| Carica papaya BAC clone 87M18, complete sequence	81069	83.8	42	1e-12	54	58	0.93			%				Plus / Minus
42-F09	456	ref|XM_002523720.1| Ricinus communis dc50, putative, mRNA	2194	95.6	48	2e-16	108	128	0.84			%				Plus / Plus
42-K01	258	gb|AY072822.1| Gossypium hirsutum putative serine carboxypeptidase precursor (SCP)mRNA, complete cds	1787	385	194	e-104	241	258	0.93	3	258	0.01				Plus / Plus
42-N01	599	dbj|AK336539.1| Lotus japonicus cDNA, clone: LjFL1-009-BB06, HTC	1355	79.8	40	2e-11	58	64	0.9			%				Plus / Plus
42-O05	498	gb|EF457754.1| Gossypium hirsutum putative calcium-binding protein gene, complete cds;transposons gypsy-like and GORGE3-likes, retrotransposonputative gypsy, and transposons Mutator-like, completesequence; alcohol dehydrogenase A gene, complete cds;transposon, myosin pseudogene, and retrotransposonputative gypsy, complete sequence; putative FAD-dependentoxidoreductase and putative protein disulfi…	130880	113	57	1e-21	94	105	0.89	1	105	0				Plus / Plus
45-A24	380	gb|EZ330763.1| TSA: Artemisia annua strain Madagascar Contig17309.Blt mRNAsequence	565	85.7	43	2e-13	64	71	0.9			%				Plus / Minus
45-C09	198	gb|GQ395137.1| Gossypium hirsutum cultivar Delta Opal clone MONCS2160 SSR markerDPL0730 genomic sequence	255	107	54	2e-20	72	78	0.92			%				Plus / Minus
45-G04	715	ref|XM_002314290.1| Populus trichocarpa predicted protein, mRNA	1029	91.7	46	6e-15	97	114	0.85			%				Plus / Plus
45-M09	204	gb|FJ415185.1| Gossypium hirsutum clone Spotp1 ascorbate peroxidase mRNA, completecds	1123	174	88	1e-40	115	124	0.92			%				Plus / Minus
gi|118551392|gb|EE592619.1|EE592619EST221	100	gb|FJ870998.1| Gossypium hirsutum ATP synthase beta subunit 1 mRNA, complete cds	2241	69.9	35	2e-09	68	79	0.86			%				Plus / Minus
gi|118551550|gb|EE592751.1|EE592751EST353	118	gb|EF672627.1| Gossypium hirsutum fasciclin-like arabinogalactan protein 1 (FLA1)mRNA, complete cds	1013	77.8	39	1e-11	39	39	1			%				Plus / Plus
gi|118551557|gb|EE592763.1|EE592763EST365	219	gb|DQ116448.1| Gossypium hirsutum CDPK-related protein kinase (CRK1) mRNA, completecds	2346	232	117	7e-58	143	155	0.92			%				Plus / Plus
gi|118551572|gb|EE592781.1|EE592781EST383	1001	gb|EZ406715.1| TSA: Mayetiola destructor Contig460, mRNA sequence	801	67.9	34	1e-07	49	54	0.9			%				Plus / Plus
gi|118552464|gb|EE592826.1|EE592826EST428	623	gb|AY255521.1| Gossypium hirsutum ABC transporter (WBC1) mRNA, complete cds	2372	75.8	38	3e-10	53	58	0.91			%				Plus / Plus
gi|118552467|gb|EE592838.1|EE592838EST440	276	gb|EZ730301.1| TSA: Arachis hypogaea CL1Contig9317.Arhy mRNA sequence	649	69.9	35	8e-09	50	55	0.9			%				Plus / Minus
gi|118551662|gb|EE592898.1|EE592898EST500	197	gb|AY574036.1| Gossypium hirsutum cyclopropane fatty acid synthase (CPA-FAS-1) mRNA,complete cds	2884	218	110	9e-54	128	133	0.96	2	133	0.01				Plus / Plus
gi|118551770|gb|EE592972.1|EE592972EST574	703	ref|XM_002315544.1| Populus trichocarpa predicted protein, mRNA	1678	176	89	1e-40	252	305	0.82	6	305	0.01				Plus / Plus
gi|118552580|gb|EE593064.1|EE593064EST666	1065	gb|EF146018.1| Populus trichocarpa clone WS0114_P13 unknown mRNA	975	69.9	35	3e-08	54	59	0.91	1	59	0.01				Plus / Plus
gi|118552043|gb|EE593234.1|EE593234EST836	380	emb|AJ608937.1| Gossypium hirsutum partial mRNA for high-glycine tyrosinekeratin-like protein (xl3 gene)	598	492	248	e-136	251	252	0.99			%				Plus / Plus
gi|118552115|gb|EE593283.1|EE593283EST885	610	gb|FJ600363.1| Gossypium hirsutum H6-like protein (H6L) mRNA, complete cds	960	111	56	5e-21	149	180	0.82			%				Plus / Plus
