# Supplementary material for: Generation, Annotation and Analysis of First Large-Scale Expressed Sequence Tags from Developing Fiber of Gossypium barbadense L
Source: PLoS One. 2011 Jul 28;6(7):e22758. doi: 10.1371/journal.pone.0022758 (PMC3145671; doi:10.1371/journal.pone.0022758)
Supplement: Table S11 — List of unigenes number and length without blastn result. 990 sequences with no blastx hits were searched for similarities at the nucleotide level. 785 unigenes (13.4%) remained unidentified. (XLS) [file pone.0022758.s015.xls]

## Sheet: TableS11_NoHits
Query	Q_Length
14-E12	100
17-N18	100
12-A14	101
16-D22	101
12-F17	102
37-J14	103
gi|118552354|gb|EE592647.1|EE592647EST249	103
17-N14	104
23-K19	104
33-M23	104
37-I05	104
06-F19	106
16-J21	106
42-K21	106
03-C12	107
34-H01	107
04-A22	108
06-J13	108
44-E16	108
03-N09	109
08-C20	109
20-I15	109
33-K09	109
15-I07	110
05-E21	111
07-O19	111
10-K03	111
20-I14	111
38-K23	111
07-B03	112
32-P19	112
CO001399	114
05-C08	115
06-L01	115
31-F16	116
11-B10	117
14-H20	117
16-M07	117
gi|118551802|gb|EE593007.1|EE593007EST609	118
04-I13	119
06-G15	120
10-M16	120
22-M12	120
31-D07	120
33-F19	120
20-O17	122
15-N04	122
39-P03	123
33-E01	124
gi|118551607|gb|EE592828.1|EE592828EST430	124
06-I04	125
16-N14	125
20-D07	125
23-G08	126
14-K15	126
15-M14	127
04-F09	128
09-A24	128
02-J15	129
08-D15	129
11-L01	129
19-E08	129
20-G20	129
39-N20	130
gi|118552668|gb|EE593130.1|EE593130EST732	130
10-O21	131
16-N13	131
23-A11	131
gi|118552412|gb|EE592745.1|EE592745EST347	131
gi|118552755|gb|EE593204.1|EE593204EST806	131
CO000365	133
03-F18	134
19-F16	134
39-G21	134
CO001293	135
06-L09	135
38-G21	135
05-N18	136
32-C03	136
44-M18	136
CO000530	137
41-K14	137
23-O04	138
45-D10	138
45-H04	138
31-K15	139
32-P22	139
35-E17	139
37-D20	139
39-N13	139
03-B06	140
03-G09	141
12-F04	141
12-G14	142
23-B16	142
37-D05	142
40-K04	142
45-F07	142
41-C23	143
07-C22	144
17-E21	144
11-K10	145
12-M01	147
15-C22	148
21-M11	148
33-I17	149
36-D19	149
06-L11	150
12-G03	150
12-N23	150
16-D11	150
12-F22	151
21-H22	151
32-L14	151
35-P19	151
07-C19	152
38-D07	152
42-A07	152
gi|118551119|gb|EE592417.1|EE592417EST018	152
10-C01	153
33-I19	153
36-B01	153
gi|118551825|gb|EE593038.1|EE593038EST640	153
34-C07	154
36-D15	154
39-P14	155
44-G22	155
03-G20	156
13-I17	157
41-G23	157
11-O18	158
10-M05	159
32-F05	159
gi|118551474|gb|EE592701.1|EE592701EST303	159
13-P05	160
23-N17	160
40-K13	161
04-A08	162
38-P03	162
42-E04	162
08-N24	163
38-B24	163
17-N12	164
33-G04	164
42-E16	164
03-M08	165
17-B07	165
37-L01	165
03-N19	166
11-E14	166
19-H16	166
37-E06	166
41-L08	166
08-N23	167
41-K21	167
45-F24	167
43-I23	169
39-F02	170
02-F18	171
09-P10	171
38-O03	171
11-C09	172
06-B09	173
18-K02	173
20-M13	173
gi|118552181|gb|EE592456.1|EE592456EST058	173
23-J06	174
37-H10	174
06-M03	175
34-F10	176
41-N09	176
19-B20	177
03-E18	178
13-O21	178
37-M01	178
03-F16	179
14-D20	179
34-J08	179
05-C12	180
05-P15	180
10-C03	180
CO001346	182
02-D11	182
gi|118552507|gb|EE592916.1|EE592916EST518	182
05-O16	183
07-N22	184
gi|118552027|gb|EE593216.1|EE593216EST818	184
23-I03	185
05-A08	185
44-F18	185
gi|118552030|gb|EE593218.1|EE593218EST820	185
gi|118552039|gb|EE593232.1|EE593232EST834	185
35-I17	186
36-C04	186
39-P21	186
40-G11	186
13-L14	187
38-O13	187
gi|118552437|gb|EE592789.1|EE592789EST391	187
gi|118552089|gb|EE593265.1|EE593265EST867	187
20-L06	188
03-K17	189
06-B10	189
09-I05	189
38-J12	189
45-K22	189
13-E06	190
gi|118551304|gb|EE592560.1|EE592560EST162	190
07-G04	191
17-E20	191
43-J06	191
03-A19	192
08-P06	192
gi|118551313|gb|EE592573.1|EE592573EST175	192
19-A10	193
CO000805	194
02-O21	195
gi|118552395|gb|EE592714.1|EE592714EST316	195
17-A19	196
35-N01	196
15-F14	197
15-N06	197
42-J18	197
14-J09	198
32-K20	198
12-O23	199
14-O08	199
23-C13	199
08-I13	200
18-B12	200
22-P15	200
02-N02	201
35-E10	201
35-J07	201
CO000695	202
23-G11	203
39-O03	203
01-N05	204
18-D06	204
18-J17	205
10-K04	206
09-F06	207
19-A11	207
23-M16	207
41-I01	208
05-A05	210
14-C06	211
02-L02	212
16-O05	212
15-A02	213
02-F11	214
31-A12	214
13-C19	216
16-G16	216
01-L13	217
10-K09	217
31-P18	217
37-K17	217
44-O21	218
38-J10	219
32-K03	220
02-D09	221
15-J06	221
22-O10	221
37-E14	221
31-E01	222
03-L24	223
20-G14	223
05-N03	224
06-M17	225
09-M05	225
37-I21	225
37-B24	226
18-N08	227
36-H24	227
20-F10	229
02-B02	230
02-N18	230
23-E21	230
37-K08	230
gi|118551637|gb|EE592865.1|EE592865EST467	230
07-O04	231
09-C07	232
34-P22	232
19-C03	233
40-M07	233
02-K19	234
16-M02	235
34-L18	237
12-P12	238
CO001025	240
04-B16	241
15-A19	241
CO001151	242
41-E06	243
15-H06	244
14-M09	245
41-B13	245
40-D10	246
18-I24	248
gi|118552523|gb|EE592950.1|EE592950EST552	248
09-C14	251
23-M07	251
34-O24	251
42-G19	251
02-A06	252
23-B05	253
40-N18	253
31-C24	254
32-K16	254
CO000922	255
16-H06	255
20-J24	255
23-K08	255
36-P14	255
38-J18	255
17-I08	256
18-C23	257
CO000360	258
02-B22	258
07-K05	258
41-A17	258
41-P10	259
02-A23	261
22-D09	261
43-M06	262
CO000429	263
18-D19	263
33-O11	263
CO001243	264
38-D12	264
32-F09	265
32-O08	265
42-N11	265
02-L15	266
15-O23	266
gi|118552551|gb|EE593014.1|EE593014EST616	266
11-G22	267
13-A15	267
43-H17	267
10-J05	268
35-M22	268
CO000260	269
13-I14	269
38-E22	269
17-O16	270
13-M04	271
22-M23	271
32-P04	271
33-M20	271
18-I13	272
16-P10	274
42-A03	274
05-P17	275
21-H06	275
31-N12	276
23-B09	277
43-G02	277
37-K24	278
23-F12	279
gi|118552100|gb|EE593278.1|EE593278EST880	279
15-G18	280
17-M01	280
41-K03	280
16-N20	282
37-H16	282
03-J06	283
10-L03	283
05-F03	284
05-I07	284
22-G13	285
39-I22	285
23-I08	286
22-F23	286
14-L09	287
17-E04	287
CO001241	289
20-O05	289
38-B04	290
gi|118552582|gb|EE593065.1|EE593065EST667	290
17-H01	292
32-P05	292
35-H21	292
05-L16	294
17-G11	294
19-B12	294
39-A19	294
19-B11	295
31-B16	296
14-O09	297
22-P23	298
09-A04	299
34-F13	299
13-I20	300
CO001096	301
23-C09	302
23-E24	302
01-L23	303
03-C11	303
10-F10	303
CO000501	304
20-F15	304
21-H07	304
42-P03	304
11-E01	305
12-M13	307
22-N20	307
08-A15	308
36-I15	308
40-A21	309
09-N09	310
32-D15	310
33-A06	311
33-F22	311
03-H12	312
39-D01	312
13-J03	313
21-E14	314
21-A07	315
09-M01	316
15-D24	317
40-N14	317
12-M23	318
06-I03	319
13-I05	319
31-C13	320
18-C16	321
15-F19	323
22-M06	323
39-K04	324
01-L05	325
12-L17	325
gi|118551714|gb|EE592941.1|EE592941EST543	325
14-I15	327
31-D03	327
10-C15	328
gi|118551584|gb|EE592797.1|EE592797EST399	329
08-M04	331
35-C10	331
40-F10	331
02-D04	332
34-D01	333
39-C18	333
gi|118552485|gb|EE592869.1|EE592869EST471	334
14-D22	335
18-E05	335
09-J07	336
33-F20	337
12-J13	338
02-H21	339
20-E18	339
21-B17	339
02-E07	342
21-M10	343
44-O14	345
CO001258	346
23-I06	347
01-N03	348
09-B09	348
09-O24	348
16-K16	349
40-I01	351
CO000131	352
18-B06	352
38-G02	352
14-O15	353
18-G01	353
14-M05	355
40-F08	355
08-G01	359
11-I16	360
13-M12	360
39-P23	365
19-G24	366
18-J10	367
41-L06	367
09-E21	368
37-E20	368
21-P06	371
07-P23	373
CO001162	375
15-F23	376
44-I09	376
32-M16	377
17-P22	379
23-J08	380
02-O16	381
08-I12	381
23-B23	382
CO001006	383
06-A16	384
10-J07	385
08-F02	386
42-K24	386
17-O24	387
34-H12	387
42-L11	390
14-D19	392
gi|118551292|gb|EE592555.1|EE592555EST157	393
09-E23	394
CO001290	396
gi|118552131|gb|EE592423.1|EE592423EST024	396
gi|118552004|gb|EE593186.1|EE593186EST788	396
21-F22	397
07-A11	398
39-M09	399
23-M19	400
23-N19	403
gi|118551794|gb|EE593004.1|EE593004EST606	406
18-A14	408
02-K10	412
03-K04	412
19-A02	413
31-C03	413
07-E14	414
22-N17	414
22-P03	414
16-O10	415
18-B15	416
gi|118551593|gb|EE592811.1|EE592811EST413	416
44-C23	417
12-C01	419
38-N19	419
05-P21	421
08-D02	421
44-P21	422
gi|118551995|gb|EE593180.1|EE593180EST782	423
16-O23	424
18-H15	424
42-H15	424
09-P13	428
CO000567	429
15-G19	434
18-K08	434
gi|118551104|gb|EE592405.1|EE592405EST006	435
34-H14	441
31-M17	442
39-G24	443
gi|118552552|gb|EE593015.1|EE593015EST617	443
CO000395	444
45-L09	444
gi|118551938|gb|EE593106.1|EE593106EST708	444
45-C01	445
19-A06	446
42-I22	446
43-D13	446
45-B06	447
CO001109	448
CO001175	448
36-E14	448
04-E07	449
10-M08	449
06-L16	452
43-M24	453
gi|118551284|gb|EE592542.1|EE592542EST144	454
CO000257	456
CO000494	456
16-O13	456
31-E18	456
42-H23	457
CO000417	459
03-B20	459
11-C21	464
09-M09	467
42-D23	467
34-O06	471
34-I02	472
CO001069	473
40-F22	474
21-F15	475
09-H05	476
12-K19	478
33-D12	479
04-P13	480
CO001095	482
37-B14	484
CO000862	486
35-P14	486
CO001294	488
42-N10	488
16-A06	491
37-G02	491
32-E11	493
44-I15	493
gi|118552439|gb|EE592790.1|EE592790EST392	493
06-A15	494
32-J11	494
40-E16	494
22-A21	495
35-F17	496
16-P07	502
35-N24	502
37-I22	505
03-A22	508
16-N23	508
32-D09	508
38-D17	508
05-B03	512
02-F14	515
09-J12	518
09-O03	518
14-B09	519
31-A11	519
gi|118552520|gb|EE592938.1|EE592938EST540	519
42-E06	521
13-O07	522
22-F03	523
04-C23	526
16-L18	527
45-C08	528
06-J19	531
17-A15	532
11-L19	533
34-M07	533
03-O13	535
10-M09	535
39-O13	537
10-N22	538
38-L18	539
35-C05	541
42-J13	544
34-K22	546
19-E17	550
40-C03	551
45-N24	551
gi|118552562|gb|EE593034.1|EE593034EST636	551
gi|118551630|gb|EE592860.1|EE592860EST462	554
CO000324	558
04-K20	558
CO000729	560
11-J10	560
35-F13	568
37-I12	569
06-L04	573
CO001166	576
11-E16	577
23-H02	579
39-B15	579
CO001402	580
34-B03	580
42-M01	580
CO000342	582
40-L12	582
CO000811	585
42-D24	585
35-I20	586
CO000799	587
CO001007	588
CO001198	589
31-N10	590
23-D13	594
14-O17	595
CO001485	596
32-K04	600
22-F18	602
21-B05	604
CO001070	606
CO001265	610
13-L03	611
36-H07	611
37-J04	611
34-H07	617
gi|118551956|gb|EE593134.1|EE593134EST736	621
CO001425	625
42-H13	628
CO001187	631
gi|118551749|gb|EE592963.1|EE592963EST565	631
13-D17	636
16-N16	636
18-M16	638
23-A07	644
17-N09	646
19-G14	648
35-H09	650
35-P15	653
10-E20	657
32-E18	658
gi|118551817|gb|EE593025.1|EE593025EST627	662
CO001343	663
CO000042	664
04-K03	667
23-H24	668
02-I13	670
35-B24	671
04-N14	673
41-L10	673
18-M07	681
05-H23	684
04-K07	685
15-M24	686
17-A24	686
43-E20	686
32-K05	688
CO000889	689
32-J21	695
42-D08	695
23-O11	696
04-K24	697
13-J15	699
07-H18	703
CO001378	704
34-E10	705
gi|118551108|gb|EE592409.1|EE592409EST010	707
17-L21	708
19-I04	710
22-J21	722
36-N07	727
CO001145	731
23-L16	739
CO000613	741
CO001296	743
CO001056	744
16-M16	747
43-L23	747
07-G17	748
16-I22	751
17-B01	751
18-F02	751
45-N05	754
08-J04	765
02-H14	767
18-K06	778
CO000656	780
01-J24	780
11-M22	781
41-C14	782
08-M18	786
34-E24	788
07-C05	790
12-I03	791
15-B22	791
23-C11	792
14-E15	793
09-H20	794
10-M15	794
37-L17	795
07-G12	797
16-P13	798
08-M09	802
12-N07	809
gi|118551317|gb|EE592574.1|EE592574EST176	810
16-J04	811
17-A20	812
43-K10	813
02-H01	817
15-B17	818
17-G14	822
18-P17	823
09-C20	830
09-F03	833
CO000896	834
06-P13	834
CO000210	836
15-B09	838
23-L11	851
43-K21	851
CO000162	857
13-H12	857
16-P11	857
15-G16	858
15-F05	860
gi|118551248|gb|EE592526.1|EE592526EST128	871
07-O21	875
34-P21	875
17-G01	876
19-P18	877
19-N01	883
19-F20	890
44-P17	890
32-A22	895
05-J15	899
03-A03	902
gi|118552005|gb|EE593187.1|EE593187EST789	911
CO000554	913
22-C13	914
CO000528	929
40-D04	946
CO000849	952
gi|118552222|gb|EE592532.1|EE592532EST134	962
gi|118552223|gb|EE592533.1|EE592533EST135	965
gi|118552349|gb|EE592634.1|EE592634EST236	1044
gi|118552061|gb|EE593251.1|EE593251EST853	1061
gi|118551100|gb|EE592401.1|EE592401EST002	1098
CO000118	1111
CO000766	1146
