# Supplementary material for: Generation, Annotation and Analysis of First Large-Scale Expressed Sequence Tags from Developing Fiber of Gossypium barbadense L
Source: PLoS One. 2011 Jul 28;6(7):e22758. doi: 10.1371/journal.pone.0022758 (PMC3145671; doi:10.1371/journal.pone.0022758)
Supplement: Table S13 — 669 G. barbadense- specific unigenes blastx against Arabidopsis . 669 unigenes without significant match to any sequence in the current EST databases of cotton, was used in a blastx search against the protein datasets of Arabidopsis with E-value≤10−5. (XLS) [file pone.0022758.s017.xls]

## Sheet: TableS13
Query	Q_Length	At_No	At_Description	At_Description2	PubMed	S_Length	Score_Bits	Score	E_Value	Identities	Identities	Identities	Positives	Positives	Positives	Gaps	Gaps	Gaps	Frame
CO000146	912	AT2G22910	GCN5-related N-acetyltransferase (GNAT) familyprotein / amino acid kinase family			609	78.2	191	7e-15	43	95	0.45	59	95	0.62				-3
CO000160	270	AT4G08790	nitrilase, putative | chr4:5608489-5611118 REVERSE	nitrilase		307	104	260	1e-23	48	79	0.6	63	79	0.79	1	79	0.01	3
CO000209	231	AT5G66470	GTP binding / RNA binding | chr5:26541986-26544302REVERSE			427	71.6	174	1e-13	36	65	0.55	46	65	0.7	1	65	0.01	-3
CO000216	314	AT3G13640	LI1 | ATRLI1; transporter | chr3:4458751-4461323REVERSE			603	59.7	143	4e-10	32	93	0.34	54	93	0.58				2
CO000229	676	ATCG00180	C1 | RNA polymerase beta' subunit-1 |chrC:20251-23084 REVERSE			680	251	640	4e-67	125	225	0.55	166	225	0.73	2	225	0	-1
CO000269	266	AT1G66970	2 | SVL2 (SHV3-LIKE 2); glycerophosphodiesterphosphodiesterase/ kinase | chr1:24			763	53.1	126	4e-08	31	63	0.49	40	63	0.63	3	63	0.04	2
CO000294	899	AT2G33150	3, PED1, KAT2 | PKT3 (PEROXISOMAL 3-KETOACYL-COATHIOLASE 3); acetyl-CoA C-acyltr	PKT3 (PEROXISOMAL 3-KETOACYL-COATHIOLASE 3)		462	101	252	6e-22	91	313	0.29	145	313	0.46	18	313	0.05	-2
CO000334	887	ATMG00510	7 | NADH dehydrogenase subunit 7 | chrM:132071-138153FORWARD	NADH dehydrogenase subunit 7		394	211	538	4e-55	109	295	0.36	165	295	0.55				3
CO000339	360	AT3G14130	(S)-2-hydroxy-acid oxidase, peroxisomal, putative /glycolate oxidase, putative /	(S)-2-hydroxy-acid oxidase, peroxisomal	http://www.ncbi.nlm.nih.gov/pubmed/15632145 The Mitochondrial Type II Peroxiredoxin F Is Essential for Redox Homeostasis and Root Growth of Arabidopsis thaliana under Stress	363	63.9	154	2e-11	29	62	0.46	41	62	0.66				2
CO000351	212	AT5G57300	UbiE/COQ5 methyltransferase family protein |chr5:23208705-23210611 REVERSE			288	68.6	166	9e-13	32	68	0.47	42	68	0.61				-2
CO000400	887	AT5G53350	X | CLPX; ATP binding / ATPase/nucleoside-triphosphatase/ nucleotide binding / p	CLPX; ATP binding / ATPase/nucleoside-triphosphatase		579	118	296	4e-27	56	111	0.5	78	111	0.7	4	111	0.03	-1
CO000432	956	AT4G15530	K | PPDK (pyruvate orthophosphate dikinase); kinase/pyruvate, phosphate dikinase	Ppdk transcripts were found to accumulate in roots of submerged seedlings, concomitant with the induction of alcohol dehydrogenase 1. Low-oxygen stress triggered an increase in PPDK activity in roots and etiolated rice seedlings, accompanied by increases in phosphoenolpyruvate carboxylase and malate dehydrogenase activities. The results indicate that cytosolic PPDK is involved in a metabolic resp…	http://www.ncbi.nlm.nih.gov/pubmed/9744098	963	73.2	178	2e-13	83	302	0.27	118	302	0.39	72	302	0.23	2
CO000456	508	AT5G67030	1, LOS6, NPQ2, ATABA1, ZEP, IBS3, ATZEP | ABA1 (ABADEFICIENT 1); zeaxanthin epox	ABA1 (ABADEFICIENT 1)		610	52.8	125	1e-07	32	86	0.37	47	86	0.54	1	86	0.01	2
CO000516	902	AT4G34200	9 | EDA9 (embryo sac development arrest 9); ATPbinding | chr4:16374041-16376561	EDA9 (embryo sac development arrest 9)		603	111	278	5e-25	68	228	0.29	111	228	0.48	1	228	0	2
CO000547	1198	AT2G18360	hydrolase, alpha/beta fold family protein |chr2:7976848-7979221 REVERSE	hydrolase, alpha/beta fold family		313	438	1127	e-123	217	312	0.69	252	312	0.8	1	312	0	2
CO000552	834	AT4G30000	dihydropterin pyrophosphokinase, putative /dihydropteroate synthase, putative /	dihydropterin pyrophosphokinase		554	58.2	139	6e-09	47	125	0.37	65	125	0.52	4	125	0.03	2
CO000565	167	AT1G01710	acyl-CoA thioesterase family protein |chr1:262950-266029 FORWARD	acyl-CoA thioesterase family protein		427	58.9	141	7e-10	26	48	0.54	37	48	0.77				-1
CO000566	772	AT4G30720	electron carrier/ oxidoreductase |chr4:14972212-14975461 REVERSE	electron carrier/ oxidoreductase		707	209	531	2e-54	123	275	0.44	167	275	0.6	20	275	0.07	-2
CO000679	840	AT1G76690	2, ATOPR2 | OPR2 | chr1:28778976-28780355 FORWARD	ATOPR2 | OPR2		374	106	265	2e-23	79	246	0.32	113	246	0.45	26	246	0.1	2
CO000682	278	AT1G67710	11 | ARR11 (RESPONSE REGULATOR 11); transcriptionfactor/ two-component response	ARR11 (RESPONSE REGULATOR 11)	http://pcp.oxfordjournals.org/content/49/1/47.full cytokinin-associated type-B ARRs	521	56.6	135	3e-09	31	88	0.35	50	88	0.56				2
CO000715	395	AT2G26740	EH | ATSEH (Arabidopsis thaliana soluble epoxidehydrolase); epoxide hydrolase |	ATSEH (Arabidopsis thaliana soluble epoxidehydrolase); epoxide hydrolase	http://onlinelibrary.wiley.com/doi/10.1111/j.1365-313X.2003.02013.x/full Selective and powerful stress gene expression in Arabidopsis in response to malondialdehyde Relative transcript abundance in Arabidopsis leaves in response to MDA treatment(EH At2g26740 Epoxide hydrolase Lipid metabolism)	321	53.9	128	3e-08	39	118	0.33	59	118	0.5	3	118	0.02	-1
CO000763	873	AT1G16740	ribosomal protein L20 family protein |chr1:5727773-5728950 FORWARD			126	99.4	246	3e-21	48	82	0.58	62	82	0.75				-1
CO000834	619	AT2G01440	ATP binding / ATP-dependent DNA helicase/ ATP-dependenthelicase/ helicase/ nucle			973	100	249	7e-22	71	211	0.33	107	211	0.5	24	211	0.11	2
CO000883	1039	AT5G06410	DNAJ heat shock N-terminal domain-containing protein| chr5:1959719-1961132 REVER	DNAJ heat shock N-terminal domain-containing protein		252	66.2	160	3e-11	41	160	0.25	80	160	0.5	1	160	0	1
CO001074	763	AT3G13050	transporter-related | chr3:4176866-4178868 FORWARD	transporter-related		500	110	276	7e-25	76	223	0.34	120	223	0.53	4	223	0.01	-1
CO001077	505	AT4G27070	2 | TSB2 (TRYPTOPHAN SYNTHASE BETA-SUBUNIT 2);tryptophan synthase | chr4:1358656			475	219	558	7e-58	114	173	0.65	130	173	0.75	5	173	0.02	-1
CO001083	860	AT1G64330	myosin heavy chain-related | chr1:23872172-23873970FORWARD			555	48.9	115	4e-06	39	146	0.26	68	146	0.46	9	146	0.06	2
CO001089	811	AT5G56310	pentatricopeptide (PPR) repeat-containing protein |chr5:22802322-22803914 FORWAR	pentatricopeptide (PPR) repeat-containing protein		530	192	487	5e-55	100	229	0.43	149	229	0.65				3
CO001107	682	AT4G30580	2, EMB1995 | ATS2; 1-acylglycerol-3-phosphateO-acyltransferase/ acyltransferase			356	49.7	117	2e-06	35	121	0.28	60	121	0.49				2
CO001186	388	AT5G01220	2 | SQD2 (sulfoquinovosyldiacylglycerol 2);UDP-glycosyltransferase/ UDP-sulfoqui	SQD2 (sulfoquinovosyldiacylglycerol 2);UDP-glycosyltransferase		510	94.4	233	2e-20	57	129	0.44	81	129	0.62	3	129	0.02	1
CO001273	319	AT5G13030	unknown protein | chr5:4133216-4136461 FORWARD			633	79.7	195	4e-16	36	59	0.61	47	59	0.79				3
CO001333	386	AT1G08980	MI1, AMI1, ATTOC64-I | AMI1 (AMIDASE 1); amidase/hydrolase, acting on carbon-nit			425	58.9	141	9e-10	35	79	0.44	46	79	0.58	2	79	0.02	-1
CO001362	266	AT5G66120	3-dehydroquinate synthase, putative |chr5:26431516-26433649 REVERSE	3-dehydroquinate synthase		442	133	335	2e-32	61	88	0.69	76	88	0.86				-3
CO001421	466	AT3G03980	short-chain dehydrogenase/reductase (SDR) familyprotein | chr3:1031786-1033081 F	short-chain dehydrogenase/reductase (SDR) familyprotein	http://www.plantphysiol.org/cgi/content/full/148/3/1583 Transcriptional Profiling of Mature Arabidopsis Trichomes Reveals That NOECK Encodes the MIXTA-Like Transcriptional Regulator MYB106 AT3G03980 short-chain dehydrogenase/reductase (SDR) family protein List of genes that are upregulated both in Arabidopsis trichomes and root atrichoblasts	270	76.6	187	6e-15	43	113	0.38	60	113	0.53	2	113	0.01	-1
CO001432	522	AT3G06810	3 | IBR3 (IBA-RESPONSE 3); acyl-CoA dehydrogenase/oxidoreductase | chr3:2146534-	IBR3 (IBA-RESPONSE 3); acyl-CoA dehydrogenase/oxidoreductase	http://www.springerlink.com/content/u2rq6g041xr52218/ IBR3 may act directly in the oxidation of IBA to IAA. http://www.plantphysiol.org/cgi/content/full/153/4/1577 Mutants Deficient in IBA-to-IAA Conversion Fail to Expand Root Hairs Exogenous Active Auxin Restores ibr1 ibr3 ibr10 Root Hair Elongation	824	67.8	164	4e-12	47	158	0.29	75	158	0.47	8	158	0.05	-2
23-H09	457	AT1G58070	unknown protein | chr1:21502968-21503822 FORWARD			284	53.1	126	7e-08	29	58	0.5	39	58	0.67	3	58	0.05	3
36-A21	874	AT1G67940	AP3 | ATNAP3; transporter | chr1:25477805-25478667FORWARD	ATNAP3; transporter		263	98.6	244	5e-21	73	182	0.4	104	182	0.57	3	182	0.01	-1
01-J19	478	AT3G15518	unknown protein | chr3:5249221-5249541 FORWARD			106	63.5	153	6e-11	39	100	0.39	55	100	0.55	3	100	0.03	1
01-N20	714	AT3G24255	FUNCTIONS IN: molecular_function unknown; INVOLVEDIN: biological_process unknown			746	79.3	194	2e-15	39	122	0.31	62	122	0.5				2
02-C13	667	AT1G27500	kinesin light chain-related | chr1:9551629-9553654REVERSE	kinesin light chain-related		650	79.3	194	2e-15	35	59	0.59	52	59	0.88				3
02-D20	823	AT1G52500	-2, ATFPG-2, ATMMH-2, MMH-2 | ATMMH-1 (ARABIDOPSISTHALIANA MUTM HOMOLOG-1); DNA			274	415	1067	e-116	205	253	0.81	226	253	0.89				1
02-F03	874	AT4G30540	glutamine amidotransferase class-I domain-containingprotein | chr4:14923327-1492	glutamine amidotransferase class-I domain-containingprotein		248	110	274	1e-24	60	184	0.32	103	184	0.55	5	184	0.02	1
02-H17	646	AT4G01320	TE24, STE24 | ATSTE24; endopeptidase/metalloendopeptidase | chr4:545905-549002 F			424	48.9	115	3e-06	24	57	0.42	35	57	0.61				-3
03-D02	367	AT1G54310	RNA binding | chr1:20273567-20275449 FORWARD			454	62.4	150	7e-11	40	121	0.33	68	121	0.56	2	121	0.01	2
03-F03	842	AT5G55130	5, SIR1 | CNX5 (CO-FACTOR FOR NITRATE, REDUCTASE ANDXANTHINE DEHYDROGENASE 5); M	CNX5 (CO-FACTOR FOR NITRATE, REDUCTASE ANDXANTHINE DEHYDROGENASE 5)		437	103	257	1e-22	53	120	0.44	80	120	0.66	2	120	0.01	3
03-G07	373	AT5G61410	| RPE; catalytic/ ribulose-phosphate 3-epimerase |chr5:24684085-24685836 REVERS			281	77	188	3e-15	38	80	0.47	51	80	0.63				2
03-G10	587	AT1G06590	unknown protein | chr1:2016504-2024505 REVERSE			916	158	400	2e-39	79	108	0.73	93	108	0.86				2
03-I15	219	AT1G48030	PD1 | mtLPD1 (mitochondrial lipoamide dehydrogenase1); ATP binding / dihydrolipo	mitochondrial lipoamide dehydrogenase1		507	56.2	134	4e-09	28	72	0.38	44	72	0.61	1	72	0.01	-3
03-I20	827	AT4G20520	RNA binding / RNA-directed DNA polymerase |chr4:11045912-11047716 FORWARD			376	73.2	178	2e-13	44	145	0.3	75	145	0.51	6	145	0.04	-2
04-I03	758	AT4G39640	1 | GGT1 (GAMMA-GLUTAMYL TRANSPEPTIDASE 1);gamma-glutamyltransferase/ glutathion	GGT1 (GAMMA-GLUTAMYL TRANSPEPTIDASE 1)		572	110	276	7e-25	76	205	0.37	106	205	0.51	9	205	0.04	2
05-B07	823	AT3G16050	, ATPDX1.2, PDX1.2 | A37; protein heterodimerization| chr3:5444121-5445065 REVER	ATPDX1.2, PDX1.2 | A37; protein heterodimerization	http://www.ncbi.nlm.nih.gov/pubmed/17227548?dopt=Abstract PDX1 is essential for vitamin B6 biosynthesis, development and stress tolerance in Arabidopsis	314	50.1	118	2e-06	49	189	0.25	82	189	0.43	3	189	0.01	-2
05-I10	819	AT1G78010	tRNA modification GTPase, putative |chr1:29333535-29336297 FORWARD			560	73.9	180	1e-13	58	198	0.29	88	198	0.44	19	198	0.09	3
05-K12	423	AT3G24715	ATP binding / protein kinase/ protein serine/threoninekinase/ protein tyrosine k			1117	83.2	204	5e-17	35	45	0.77	40	45	0.88				1
06-H23	769	AT2G28070	ABC transporter family protein | chr2:11956432-11959782FORWARD	ABC transporter family protein		730	261	668	3e-70	124	209	0.59	154	209	0.73				3
06-K01	846	AT5G35730	EXS family protein / ERD1/XPR1/SYG1 family protein |chr5:13893941-13896821 FORWA	EXS family protein / ERD1/XPR1/SYG1 family protein		457	339	869	1e-93	166	236	0.7	187	236	0.79				1
07-A12	870	AT5G13950	unknown protein | chr5:4496196-4500206 REVERSE			939	209	533	1e-54	99	188	0.52	133	188	0.7				2
07-A14	707	AT5G65820	pentatricopeptide (PPR) repeat-containing protein |chr5:26339876-26341789 REVERS	pentatricopeptide (PPR) repeat-containing protein		637	80.1	196	1e-15	56	201	0.27	94	201	0.46	1	201	0	2
07-E09	843	ATMG01360	1 | cytochrome c oxidase subunit 1 |chrM:349830-351413 REVERSE	cytochrome c oxidase subunit		527	75.9	185	3e-14	40	105	0.38	59	105	0.56	2	105	0.01	-3
07-K15	293	AT1G30600	subtilase family protein | chr1:10841341-10844906REVERSE			832	47.4	111	2e-06	21	31	0.67	27	31	0.87				1
07-M18	157	AT5G50370	adenylate kinase, putative | chr5:20509382-20510631REVERSE	adenylate kinase		248	68.2	165	1e-12	29	49	0.59	38	49	0.77				-1
08-K21	835	AT5G43980	P1, PDLP1A | PDLP1 (PLASMODESMATA-LOCATED PROTEIN 1)| chr5:17694817-17696458 REV	PDLP1 (PLASMODESMATA-LOCATED PROTEIN 1)		303	223	567	1e-58	114	212	0.53	142	212	0.66	16	212	0.07	1
08-L19	815	AT1G20760	calcium-binding EF hand family protein |chr1:7209515-7214773 FORWARD	calcium-binding EF hand family protein		1019	241	614	5e-64	127	238	0.53	152	238	0.63	3	238	0.01	3
08-M04	331	AT3G09660	8 | MCM8; ATP binding / DNA binding / DNA-dependentATPase/ nucleoside-triphospha			777	46.2	108	5e-06	20	24	0.83	22	24	0.91				3
08-M14	770	AT1G01280	703A2, CYP703 | CYP703A2 (CYTOCHROME P450, FAMILY703, SUBFAMILY A, POLYPEPTIDE 2	CYTOCHROME P450		510	407	1047	e-114	197	241	0.81	220	241	0.91	1	241	0	2
08-O07	832	AT1G80150	pentatricopeptide (PPR) repeat-containing protein |chr1:30148738-30149931 FORWAR			397	268	684	4e-72	126	211	0.59	160	211	0.75				3
09-K01	629	AT5G13740	1 | ZIF1 (ZINC INDUCED FACILITATOR 1); carbohydratetransmembrane transporter/ su			486	47	110	9e-06	34	108	0.31	55	108	0.5	3	108	0.02	-1
09-K12	540	AT1G67940	AP3 | ATNAP3; transporter | chr1:25477805-25478667FORWARD	ATNAP3; transporter		263	69.3	168	1e-12	54	174	0.31	87	174	0.5	3	174	0.01	3
09-K13	607	AT5G48540	33 kDa secretory protein-related |chr5:19669096-19669887 REVERSE			263	53.1	126	1e-07	34	116	0.29	49	116	0.42	4	116	0.03	3
09-L07	317	AT5G19200	short-chain dehydrogenase/reductase (SDR) familyprotein | chr5:6458995-6460690 F	short-chain dehydrogenase/reductase (SDR) familyprotein		331	50.8	120	2e-07	29	87	0.33	45	87	0.51	3	87	0.03	3
09-L16	582	AT3G61620	41 | RRP41; 3'-5'-exoribonuclease/ RNA binding |chr3:22801382-22802910 REVERSE			241	56.2	134	1e-08	41	131	0.31	61	131	0.46				2
10-B06	615	AT1G67940	AP3 | ATNAP3; transporter | chr1:25477805-25478667FORWARD	ATNAP3; transporter		263	109	273	1e-24	68	150	0.45	96	150	0.64	2	150	0.01	-2
10-D17	872	AT2G34960	5 | CAT5 (CATIONIC AMINO ACID TRANSPORTER 5);L-glutamate transmembrane transport	CAT5 (CATIONIC AMINO ACID TRANSPORTER 5)		569	58.2	139	7e-09	39	125	0.31	58	125	0.46	1	125	0	3
10-M17	305	AT2G39800	S1, ATP5CS | P5CS1 (DELTA1-PYRROLINE-5-CARBOXYLATESYNTHASE 1); delta1-pyrroline-	ATP5CS | P5CS1 (DELTA1-PYRROLINE-5-CARBOXYLATESYNTHASE 1)		717	115	287	8e-27	52	86	0.6	68	86	0.79				1
11-C24	761	AT1G77120	1, ADH, ATADH, ATADH1 | ADH1 (ALCOHOL DEHYDROGENASE1); alcohol dehydrogenase | c	ADH, ATADH, ATADH1 | ADH1 (ALCOHOL DEHYDROGENASE1)		379	122	307	2e-28	63	168	0.37	93	168	0.55	4	168	0.02	1
11-I07	843	AT2G45270	glycoprotease M22 family protein |chr2:18666583-18669332 FORWARD			480	99.4	246	2e-21	55	161	0.34	83	161	0.51				-2
11-I18	747	AT1G61140	16 | EDA16 (embryo sac development arrest 16); ATPbinding / DNA binding / helica	EDA16 (embryo sac development arrest 16)		1122	173	439	9e-44	101	209	0.48	126	209	0.6	6	209	0.02	2
11-N16	792	AT5G58270	1, ATATM3, ATM3 | STA1 (STARIK 1); ATPase, coupled totransmembrane movement of s	STA1 (STARIK 1); ATPase, coupled totransmembrane movement		728	184	468	4e-47	93	204	0.45	135	204	0.66	2	204	0	1
12-F14	871	AT2G43750	B, ACS1, CPACS1, ATCS-B | OASB (O-ACETYLSERINE(THIOL) LYASE B); cysteine synthas	ACS1, CPACS1, ATCS-B | OASB (O-ACETYLSERINE(THIOL) LYASE B)		392	80.9	198	1e-15	45	151	0.29	77	151	0.5	1	151	0	-1
12-J07	793	AT2G22250	AT, AAT, MEE17 | aminotransferase class I and IIfamily protein | chr2:9458011-94			475	87.8	216	7e-18	59	174	0.33	84	174	0.48	12	174	0.06	2
12-J19	912	AT5G43940	5, ADH2, GSNOR | HOT5 (sensitive to hot temperatures5); S-(hydroxymethyl)glutath	HOT5 (sensitive to hot temperatures5); S-(hydroxymethyl)glutath		379	306	784	1e-83	153	263	0.58	191	263	0.72	1	263	0	-1
12-K03	883	AT5G25950	unknown protein | chr5:9057929-9059860 REVERSE			432	283	725	8e-77	147	291	0.5	194	291	0.66	3	291	0.01	2
12-L04	560	AT2G02650	reverse transcriptase-related | chr2:735411-736546FORWARD			365	54.7	130	4e-08	34	116	0.29	54	116	0.46				-1
13-A12	574	AT1G30410	RP13 | ATMRP13; ATPase, coupled to transmembranemovement of substances | chr1:10			1465	100	248	8e-22	47	66	0.71	59	66	0.89				1
13-P07	786	AT1G03270	FUNCTIONS IN: molecular_function unknown; INVOLVEDIN: biological_process unknown			499	47.8	112	8e-06	26	80	0.32	43	80	0.53	1	80	0.01	-2
15-E11	762	AT1G67710	11 | ARR11 (RESPONSE REGULATOR 11); transcriptionfactor/ two-component response	ARR11 (RESPONSE REGULATOR 11)		521	65.9	159	3e-11	37	110	0.33	65	110	0.59	3	110	0.02	-1
15-I18	514	ATMG00900	256 | cytochrome c biogenesis orf256 |chrM:239988-240758 REVERSE	cytochrome c biogenesis		256	110	276	4e-25	60	145	0.41	81	145	0.55				2
16-F07	491	AT1G79870	oxidoreductase family protein |chr1:30044794-30045851 FORWARD	oxidoreductase family protein		313	148	374	1e-36	82	161	0.5	102	161	0.63				-1
16-G06	445	AT1G24360	3-oxoacyl-(acyl-carrier protein) reductase,chloroplast / 3-ketoacyl-acyl carrier	3-oxoacyl-(acyl-carrier protein) reductase		319	81.6	200	2e-16	50	139	0.35	77	139	0.55	2	139	0.01	2
16-K13	308	AT4G01830	5 | PGP5 (P-GLYCOPROTEIN 5); ATPase, coupled totransmembrane movement of substan			1230	49.3	116	5e-07	28	68	0.41	39	68	0.57				-1
16-N02	678	AT1G70610	AP1 | ATTAP1; ATPase, coupled to transmembranemovement of substances / transport			700	49.7	117	2e-06	37	105	0.35	55	105	0.52	4	105	0.03	2
16-P05	811	AT4G36670	mannitol transporter, putative |chr4:17287680-17289483 REVERSE	mannitol transporter		493	394	1012	e-110	188	259	0.72	225	259	0.86	1	259	0	2
16-P15	348	AT4G34030	B | MCCB (3-METHYLCROTONYL-COA CARBOXYLASE); biotincarboxylase/ methylcrotonoyl-	MCCB (3-METHYLCROTONYL-COA CARBOXYLASE)		587	171	433	9e-44	83	114	0.72	95	114	0.83				3
17-H16	854	AT3G20660	CT4 | AtOCT4 (Arabidopsis thaliana ORGANICCATION/CARNITINE TRANSPORTER4); carboh	AtOCT4 (Arabidopsis thaliana ORGANICCATION/CARNITINE TRANSPORTER4)		526	59.3	142	3e-09	37	138	0.26	73	138	0.52	5	138	0.03	-3
17-J08	678	AT2G34150	E1 | WAVE1; actin monomer binding |chr2:14419432-14423259 REVERSE	WAVE1; actin monomer binding	http://www.ncbi.nlm.nih.gov/pubmed/15659634?dopt=Abstract DISTORTED3/SCAR2 is a putative arabidopsis WAVE complex subunit that activates the Arp2/3 complex and is required for epidermal morphogenesis	821	197	502	2e-65	94	135	0.69	116	135	0.85				2
17-K06	316	AT1G74920	H10A8 | ALDH10A8; 3-chloroallyl aldehydedehydrogenase/ oxidoreductase | chr1:281			501	58.5	140	9e-10	35	95	0.36	50	95	0.52				3
17-K19	424	AT3G27960	kinesin light chain-related | chr3:10380513-10382593REVERSE	kinesin light chain-related		663	157	396	3e-39	82	111	0.73	92	111	0.82				1
18-B19	472	AT3G55850	3, LAF3 ISF1 | LAF3 (LONG AFTER FAR-RED 3);hydrolase/ hydrolase, acting on carbo			583	47	110	2e-09	25	63	0.39	36	63	0.57	1	63	0.01	3
18-D23	398	AT5G51970	sorbitol dehydrogenase, putative / L-iditol2-dehydrogenase, putative | chr5:2111			364	48.5	114	1e-06	32	124	0.25	64	124	0.51	4	124	0.03	3
18-I22	703	AT3G05680	2016 | EMB2016 (embryo defective 2016) |chr3:1660802-1672015 REVERSE			2138	251	641	3e-67	125	169	0.73	146	169	0.86				2
18-J04	491	AT1G65410	AP11, TGD3 | ATNAP11 (ARABIDOPSIS THALIANANON-INTRINSIC ABC PROTEIN 11); transpo	ATNAP11 (ARABIDOPSIS THALIANANON-INTRINSIC ABC PROTEIN 11)		345	65.9	159	1e-11	48	146	0.32	74	146	0.5	14	146	0.09	1
18-N24	860	AT1G78060	glycosyl hydrolase family 3 protein |chr1:29349796-29352868 REVERSE	glycosyl hydrolase family 3 protein		767	106	264	2e-23	82	264	0.31	122	264	0.46	40	264	0.15	1
18-P24	880	AT1G07440	tropinone reductase, putative / tropinedehydrogenase, putative | chr1:2286436-22	tropinone reductase		266	87.4	215	1e-17	48	117	0.41	72	117	0.61				-1
19-C15	958	AT2G01110	2, UNE3, PGA2, TATC | APG2 (ALBINO AND PALE GREEN 2);proton motive force depende	APG2 (ALBINO AND PALE GREEN 2)		340	99.4	246	3e-21	56	178	0.31	90	178	0.5				-3
19-C23	608	AT5G52180	unknown protein | chr5:21200165-21201541 REVERSE			458	190	482	6e-49	91	145	0.62	112	145	0.77	10	145	0.06	1
19-N14	692	AT1G79440	H5F1, SSADH1, SSADH | ALDH5F1; 3-chloroallyl aldehydedehydrogenase/ NAD or NADH			528	90.1	222	1e-18	48	109	0.44	66	109	0.6	2	109	0.01	2
20-A22	477	AT3G10360	M4 | APUM4 (Arabidopsis Pumilio 4); RNA binding /binding | chr3:3211276-3215144	APUM4 (Arabidopsis Pumilio 4)		1003	147	372	2e-36	77	140	0.55	101	140	0.72	3	140	0.02	1
20-B11	783	AT3G10670	AP7 | ATNAP7; ATPase, coupled to transmembranemovement of substances / protein b			338	48.5	114	5e-06	28	79	0.35	46	79	0.58				3
20-M06	870	AT1G65410	AP11, TGD3 | ATNAP11 (ARABIDOPSIS THALIANANON-INTRINSIC ABC PROTEIN 11); transpo	ATNAP11 (ARABIDOPSIS THALIANANON-INTRINSIC ABC PROTEIN 11)		345	77.8	190	8e-15	70	254	0.27	112	254	0.44	16	254	0.06	-2
21-I14	711	AT5G63890	DH | ATHDH (HISTIDINOL DEHYDROGENASE); histidinoldehydrogenase | chr5:25565600-2	ATHDH (HISTIDINOL DEHYDROGENASE)		466	137	346	5e-33	82	217	0.37	123	217	0.56	4	217	0.01	2
21-O01	321	AT4G28620	TM2, ATM2 | ATM2 (ABC TRANSPORTER OF THEMITOCHONDRION 2); ATPase, coupled to tra	ABC TRANSPORTER OF THEMITOCHONDRION 2		680	134	336	2e-32	69	106	0.65	80	106	0.75				3
22-D03	523	AT1G18720	unknown protein | chr1:6458020-6459658 REVERSE			206	50.8	120	5e-07	46	156	0.29	70	156	0.44	18	156	0.11	2
23-A02	751	AT5G55950	transporter-related | chr5:22658411-22660253 REVERSE	transporter-related		398	366	940	e-102	184	237	0.77	203	237	0.85				1
23-C07	684	AT5G55070	2-oxoacid dehydrogenase family protein |chr5:22347637-22350409 FORWARD	2-oxoacid dehydrogenase family protein		464	50.4	119	1e-06	26	70	0.37	43	70	0.61	1	70	0.01	-2
23-F02	573	AT1G12600	FUNCTIONS IN: molecular_function unknown; INVOLVEDIN: biological_process unknown			349	155	393	1e-38	78	87	0.89	83	87	0.95				2
23-M21	342	AT4G20930	3-hydroxyisobutyrate dehydrogenase, putative |chr4:11198627-11201036 REVERSE	3-hydroxyisobutyrate dehydrogenase, putative		347	116	291	3e-27	54	109	0.49	75	109	0.68				-2
23-N02	819	AT1G67940	AP3 | ATNAP3; transporter | chr1:25477805-25478667FORWARD	ATNAP3; transporter |		263	58.2	139	6e-09	37	90	0.41	52	90	0.57				1
31-B08	823	AT2G14260	| PIP; aminopeptidase | chr2:6041441-6043475 REVERSE	PIP; aminopeptidase		329	73.2	178	2e-13	31	50	0.62	37	50	0.74				-3
31-I24	901	AT3G23940	dehydratase family | chr3:8648780-8652323 FORWARD	dehydratase family		608	171	432	7e-43	105	295	0.35	160	295	0.54				-3
31-K13	827	AT1G55790	ATP binding / nucleotide binding / phenylalanine-tRNAligase | chr1:20853792-2085			414	142	357	3e-34	76	134	0.56	91	134	0.67	1	134	0	1
32-G21	462	AT1G24360	3-oxoacyl-(acyl-carrier protein) reductase,chloroplast / 3-ketoacyl-acyl carrier	3-oxoacyl-(acyl-carrier protein) reductase		319	50.8	120	4e-07	33	120	0.27	50	120	0.41				-2
32-G23	862	AT2G31400	pentatricopeptide (PPR) repeat-containing protein |chr2:13387201-13390550 REVERS	pentatricopeptide (PPR) repeat-containing protein		918	197	502	5e-51	125	268	0.46	156	268	0.58	29	268	0.1	2
32-J04	315	AT1G67940	AP3 | ATNAP3; transporter | chr1:25477805-25478667FORWARD			263	49.7	117	4e-07	27	78	0.34	46	78	0.58				-1
32-K13	836	AT5G11040	FUNCTIONS IN: molecular_function unknown; INVOLVED IN:biological_process unknown			1186	441	1134	e-124	218	276	0.78	249	276	0.9				2
33-B08	645	AT1G70610	AP1 | ATTAP1; ATPase, coupled to transmembranemovement of substances / transport			700	47	110	1e-05	22	41	0.53	31	41	0.75				1
33-E05	775	AT5G26040	2 | HDA2; histone deacetylase | chr5:9099321-9101598REVERSE	HDA2; histone deacetylase		387	74.7	182	6e-14	61	243	0.25	105	243	0.43	17	243	0.06	-1
33-H10	556	AT5G61960	1 | AML1 (ARABIDOPSIS MEI2-LIKE PROTEIN 1); RNAbinding / protein binding | chr5:	AML1 (ARABIDOPSIS MEI2-LIKE PROTEIN 1)	http://www.ncbi.nlm.nih.gov/pubmed/15720729 The Arabidopsis Mei2 homologue AML1 binds AtRaptor1B, the plant homologue of a major regulator of eukaryotic cell growth	915	51.6	122	3e-07	22	41	0.53	29	41	0.7				1
33-K05	767	AT2G37210	Encodes a protein of unknown function. It has beencrystallized and shown to be			215	61.6	148	5e-10	45	189	0.23	91	189	0.48	7	189	0.03	2
33-L05	955	AT5G12920	FUNCTIONS IN: molecular_function unknown; INVOLVED IN:biological_process unknown			572	308	790	2e-84	153	260	0.58	190	260	0.73	13	260	0.05	2
34-F19	589	AT3G02875	1 | ILR1 (IAA-LEUCINE RESISTANT 1); IAA-Leu conjugatehydrolase/ IAA-Phe conjugat	ILR1 (IAA-LEUCINE RESISTANT 1); IAA-Leu conjugatehydrolase		442	95.1	235	3e-20	65	186	0.34	98	186	0.52	4	186	0.02	-3
34-J02	878	AT1G60600	4 | ABC4 (ABERRANT CHLOROPLAST DEVELOPMENT 4);1,4-dihydroxy-2-naphthoate octapre			382	238	608	3e-63	119	168	0.7	134	168	0.79				3
34-L10	834	AT4G00450	| CRP (CRYPTIC PRECOCIOUS) | chr4:202425-210666FORWARD			2253	224	571	5e-59	114	162	0.7	129	162	0.79				1
34-M08	914	AT4G08900	arginase | chr4:5703499-5705180 FORWARD			342	58.5	140	6e-09	41	140	0.29	67	140	0.47	9	140	0.06	1
35-E11	256	AT2G04400	indole-3-glycerol phosphate synthase (IGPS) |chr2:1531208-1533578 FORWARD	indole-3-glycerol phosphate synthase (IGPS)		402	72.8	177	5e-14	43	79	0.54	54	79	0.68	4	79	0.05	-3
36-A06	509	AT3G57050	| CBL (cystathionine beta-lyase); cystathioninebeta-lyase | chr3:21111939-21114			449	95.5	236	2e-20	56	151	0.37	80	151	0.52	1	151	0	3
36-B08	595	AT5G40240	nodulin MtN21 family protein | chr5:16082325-16084466REVERSE	nodulin MtN21 family protein		368	133	334	9e-32	71	150	0.47	98	150	0.65	11	150	0.07	2
36-C18	773	AT4G21220	bacterial transferase hexapeptide repeat-containingprotein | chr4:11316978-11319	bacterial transferase hexapeptide repeat-containingprotein		304	272	696	1e-73	133	198	0.67	154	198	0.77	4	198	0.02	3
37-L03	556	AT1G72810	threonine synthase, putative | chr1:27398760-27400393REVERSE			516	57.8	138	4e-09	46	182	0.25	82	182	0.45	7	182	0.03	-3
37-P13	823	AT5G44790	1, HMA7 | RAN1 (RESPONSIVE-TO-ANTAGONIST 1); ATPase,coupled to transmembrane mov	RAN1 (RESPONSIVE-TO-ANTAGONIST 1)		1001	107	268	7e-24	65	181	0.35	106	181	0.58	7	181	0.03	-3
38-F17	543	AT1G71880	1, ATSUC1 | SUC1 (Sucrose-proton symporter 1);carbohydrate transmembrane transpo			513	49.7	117	1e-06	27	63	0.42	32	63	0.5				1
39-D17	928	AT4G01870	tolB protein-related | chr4:808473-810431 REVERSE			652	58.9	141	4e-09	51	180	0.28	74	180	0.41	18	180	0.1	2
39-H02	608	AT2G29260	tropinone reductase, putative / tropinedehydrogenase, putative | chr2:12582523-1			322	47.4	111	7e-06	27	97	0.27	55	97	0.56				-2
39-I12	759	AT5G10830	embryo-abundant protein-related |chr5:3423731-3424649 FORWARD	embryo-abundant protein-related		261	273	698	8e-74	126	204	0.61	162	204	0.79	1	204	0	3
40-A09	605	AT1G51760	3, JR3 | IAR3 (IAA-ALANINE RESISTANT 3); IAA-Alaconjugate hydrolase/ metallopept	IAR3 (IAA-ALANINE RESISTANT 3)	http://www.ncbi.nlm.nih.gov/pubmed/10072397?dopt=Abstract IAR3 encodes an auxin conjugate hydrolase from Arabidopsis	440	55.1	131	3e-08	37	131	0.28	64	131	0.48	5	131	0.03	2
40-A11	576	AT1G62640	III | KAS III (3-KETOACYL-ACYL CARRIER PROTEINSYNTHASE III); 3-oxoacyl-[acyl-ca			404	47.4	111	6e-06	27	79	0.34	42	79	0.53				-3
40-B06	226	AT5G10050	short-chain dehydrogenase/reductase (SDR) familyprotein | chr5:3144254-3145643 F	short-chain dehydrogenase/reductase (SDR) familyprotein		279	54.7	130	1e-08	25	66	0.37	42	66	0.63				3
40-K22	347	AT1G18270	ketose-bisphosphate aldolase class-II family protein| chr1:6283634-6293772 REVER	ketose-bisphosphate aldolase class-II family protein		1374	86.7	213	3e-18	50	114	0.43	73	114	0.64	2	114	0.01	-2
41-F03	372	AT3G62970	protein binding / zinc ion binding |chr3:23270636-23272698 FORWARD	protein binding / zinc ion binding		287	197	501	1e-51	83	122	0.68	99	122	0.81				1
41-H07	656	AT2G04540	3-oxoacyl-(acyl-carrier-protein) synthase II,putative | chr2:1581521-1584635 REV	3-oxoacyl-(acyl-carrier-protein) synthase II		461	193	491	7e-50	96	167	0.57	119	167	0.71	4	167	0.02	3
41-I12	200	AT3G43600	2 | AAO2 (ALDEHYDE OXIDASE 2); aldehyde oxidase |chr3:15512778-15517375 REVERSE	AAO2 (ALDEHYDE OXIDASE 2); aldehyde oxidase		1321	62.8	151	5e-11	30	63	0.47	39	63	0.61				2
41-K18	902	AT3G63240	endonuclease/exonuclease/phosphatase family protein |chr3:23364411-23366876 REVE			547	111	278	5e-25	56	95	0.58	68	95	0.71				1
42-E20	732	AT1G07645	SI-1VOC | ATDSI-1VOC (DESSICATION-INDUCED 1VOCSUPERFAMILY PROTEIN); catalytic |	ATDSI-1VOC (DESSICATION-INDUCED 1VOCSUPERFAMILY PROTEIN)		137	61.2	147	6e-10	31	74	0.41	47	74	0.63	3	74	0.04	1
42-M20	861	AT2G45040	matrix metalloproteinase | chr2:18577693-18578721FORWARD	matrix metalloproteinase		342	293	750	9e-80	142	224	0.63	171	224	0.76	1	224	0	1
42-P07	576	AT4G16110	2 | ARR2 (ARABIDOPSIS RESPONSE REGULATOR 2);transcription factor/ two-component			664	49.7	117	1e-06	25	62	0.4	38	62	0.61				3
43-K13	449	AT1G08490	UFS, SUFS, ATCPNIFS, ATNFS2, CPNIFS | CPNIFS(CHLOROPLASTIC NIFS-LIKE CYSTEINE DE			463	102	254	1e-22	53	100	0.53	74	100	0.74	1	100	0.01	3
44-E10	757	AT5G10920	argininosuccinate lyase, putative / arginosuccinase,putative | chr5:3441805-3443	argininosuccinate lyase		517	259	661	2e-69	138	248	0.55	162	248	0.65				3
44-K01	577	AT1G62280	H1 | SLAH1 (SLAC1 HOMOLOGUE 1); transporter |chr1:23007309-23008540 REVERSE	SLAH1 (SLAC1 HOMOLOGUE 1); transporter		385	178	451	2e-45	98	191	0.51	122	191	0.63	1	191	0	3
44-O06	888	AT5G24030	H3 | SLAH3 (SLAC1 HOMOLOGUE 3); transporter |chr5:8118618-8120993 REVERSE	SLAH3 (SLAC1 HOMOLOGUE 3); transporter		635	349	896	1e-96	182	325	0.56	220	325	0.67	32	325	0.09	1
45-J22	702	AT3G15360	M4, TRX-M4, ATM4 | TRX-M4 (ARABIDOPSIS THIOREDOXINM-TYPE 4); enzyme activator |	TRX-M4 (ARABIDOPSIS THIOREDOXINM-TYPE 4)		193	75.5	184	3e-14	31	82	0.37	52	82	0.63				-3
gi|118551120|gb|EE592418.1|EE592418EST019	1157	AT1G06590	unknown protein | chr1:2016504-2024505 REVERSE			916	404	1039	e-113	213	315	0.67	247	315	0.78	3	315	0	2
gi|118551160|gb|EE592463.1|EE592463EST065	1184	AT1G04580	4, ATAO-4, ATAO2 | AAO4 (ARABIDOPSIS ALDEHYDE OXIDASE4); aldehyde oxidase/ aryl-	AAO4 (ARABIDOPSIS ALDEHYDE OXIDASE4)		1337	54.7	130	1e-07	54	235	0.22	99	235	0.42	11	235	0.04	2
gi|118551713|gb|EE592940.1|EE592940EST542	918	AT4G02485	oxidoreductase, 2OG-Fe(II) oxygenase family protein |chr4:1092695-1094437 FORWAR	oxidoreductase, 2OG-Fe(II) oxygenase family protein		226	256	655	1e-68	139	242	0.57	165	242	0.68	9	242	0.03	2
gi|118551771|gb|EE592973.1|EE592973EST575	144	ATMG01010	118 | hypothetical protein | chrM:261105-261461REVERSE			118	55.8	133	6e-09	30	48	0.62	37	48	0.77	2	48	0.04	-3
gi|118552691|gb|EE593145.1|EE593145EST747	1027	ATMG00520	R | hypothetical protein | chrM:144294-146312 REVERSE			672	356	913	1e-98	183	211	0.86	192	211	0.9	4	211	0.01	2
