# Supplementary material for: Generation, Annotation and Analysis of First Large-Scale Expressed Sequence Tags from Developing Fiber of Gossypium barbadense L
Source: PLoS One. 2011 Jul 28;6(7):e22758. doi: 10.1371/journal.pone.0022758 (PMC3145671; doi:10.1371/journal.pone.0022758)
Supplement: Table S14 — List and classification of cell wall-related genes. The 5852 unigenes were assessed by blastx against the Cell Wall Navigator (CWN) database to identify cell wall-related genes. 282 sequences had homologs (blastx, E-value≤10−5) in the CWN. (XLS) [file pone.0022758.s018.xls]

## Sheet: TableS14
	Categories	Total of ESTs	Total of Unigenes	Redundancy
1.1 Sugar 1-kinases (S1K)		1	1	1
1.2 Nucleotide-sugar pyrophosphorylases		16	10	1.6
	1.2.1 GDP-mannose pyrophosphorylase (GMP)	7	6	1.16667
	1.2.2 UDP-glucose pyrophosphorylases (UGP)	9	4	2.25
1.3 Nucleotide-sugar interconversion enzymes		186	36	5.16667
	1.3.1 NAD dependent epimerase/dehydratase superfamily (NSI)	174	31	5.6129
	1.3.2 Nucleotide sugar dehydrogenase superfamily (UGD)	12	5	2.4
2.1 Cellulose and Galactomannan		31	11	2.81818
	2.1.1 Cellulose and beta-mannan synthase-like (CSL)	31	11	2.81818
2.2 Hemicellulose		33	19	1.73684
	2.2.1 Reversibly glycosylated polypeptides (RGP)	10	3	3.33333
	2.2.2 Xyloglucan galactosyltransferases (XGT)	18	12	1.5
	2.2.3 Xyloglucan fucosyltransferase (XFT)
	2.2.4 Xyloglucan xylosyltransferases and galactomannan galactosyltransferases (XXT)	5	4	1.25
2.3 Callose		5	4	1.25
	2.3.1 Glucan synthase-like (GSL)	5	4	1.25
2.4 Other glycosyl transferases		64	49	1.30612
	2.4.1 Glycosyl transferases (pectin bios.) (GT8)	64	49	1.30612
3.1 Cell Expansion		128	31	4.12903
	3.1.1 Expansins (EXP)	75	10	7.5
	3.1.2 Yieldins (GH18)	53	21	2.52381
3.2 Hemicellulose reassembly		24	9	2.66667
	3.2.1 Xyloglucan endotransglycosylases/hydrolases (XTH)	24	9	2.66667
3.3 Glycoside hydrolases		79	37	2.13514
	3.3.1 Beta-galactosidases (BGAL)	11	8	1.375
	3.3.2 Glycoside hydrolases 9 (GH9)	47	17	2.76471
	3.3.3 Glycoside hydrolases 17 (GH17)
	3.3.4 Polygalacturonases (GH28)	3	3	1
	3.3.5 Glycoside Hydrolase Family 10 (GH10)	3	2	1.5
	3.3.6 Glycoside Hydrolase Family 43 (GH43)	8	5	1.6
	3.3.7 Glycoside Hydrolase Family 51 (GH51)	7	2	3.5
3.4 Lyases		29	8	3.625
	3.4.1 Pectate and pectin lyases (PL1)	21	4	5.25
	3.4.2 Rhamnogalacturonan I lyases (PL4)	8	4	2
3.5 Esterases		33	20	1.65
	3.5.1 Pectin methyl esterases (PME)	32	19	1.68421
	3.5.2 Pectin acetylesterases (PAE)	1	1	1
	3.5.3 Feruloyl esterases (FE)
4.1 Hydroxyproline-rich glycoproteins (HRGP)		8	6	1.33333
4.2 Leucine-rich repeat extensins (LRX)		30	21	1.42857
4.3 Proline-rich proteins (PRP)		3	2	1.5
4.4 Glycine-rich proteins (GRP)
4.5 Arabinogalactan proteins (AGP)		237	12	19.75
5.1 Glycoprotein fucosyltransferases (GFT)		1	1	1
5.2 Glycosyl transferases 21A (GT31a)		3	3	1
5.3 Glycosyl transferases 31B (GT31b)		4	2	2
Total		915	282	3.24468
