# Supplementary material for: Generation, Annotation and Analysis of First Large-Scale Expressed Sequence Tags from Developing Fiber of Gossypium barbadense L
Source: PLoS One. 2011 Jul 28;6(7):e22758. doi: 10.1371/journal.pone.0022758 (PMC3145671; doi:10.1371/journal.pone.0022758)
Supplement: Table S15 — List and categories of putative transcription factors. The 5852 unigenes were assessed by blastx against the PlantTFDB 2.0 database to identify putative TFs. 736 sequences (12.6% of unigenes, including 1317 ESTs) had homologs in PlantTFDB at E-value≤10−5. (XLS) [file pone.0022758.s019.xls]

## Sheet: TableS15
TF family	G. barbadense					G. hirsutum		Vitis vinifera		Brachypodium distachyon		Oryza sativa subsp. Indica		Zea mays		Arabidopsis thaliana		Populus trichocarpa
	Total of ESTs	%	Total of Unigenes	Redundancy	%	count	%	count	%	count	%	count	%	count	%	count	%	count	%
AP2	3	0.2	3	1	0.4	8	0.7	33	1.4	30	1.8	27	1.4	46	1.4	25	1.2	30	1.2
ARF	16	1.2	16	1	2.2	7	0.6	34	1.4	35	2.1	24	1.2	65	1.9	32	1.6	47	1.8
ARR-B	10	0.8	10	1	1.4	2	0.2	23	0.9	10	0.6	9	0.5	12	0.4	16	0.8	21	0.8
B3	7	0.5	7	1	1	23	2.1	46	1.9	46	2.7	55	2.8	71	2.1	71	3.5	116	4.5
BBR/BPC	1	0.1	1	1	0.1	6	0.5	10	0.4	3	0.2	3	0.2	6	0.2	11	0.5	16	0.6
BES1	8	0.6	8	1	1.1	7	0.6	9	0.4	5	0.3	5	0.3	13	0.4	8	0.4	14	0.5
bHLH	50	3.8	50	1	6.8	92	8.3	222	9.1	159	9.4	178	9.2	332	9.9	194	9.6	226	8.7
bZIP	71	5.4	71	1	9.6	71	6.4	89	3.7	102	6	99	5.1	216	6.4	101	5	106	4.1
C2H2	46	3.5	46	1	6.3	56	5	130	5.3	79	4.7	91	4.7	151	4.5	104	5.2	115	4.4
C3H	43	3.3	43	1	5.8	44	4	68	2.8	44	2.6	50	2.6	103	3.1	56	2.8	69	2.7
CAMTA	3	0.2	3	1	0.4	2	0.2	8	0.3	9	0.5	8	0.4	9	0.3	7	0.3	9	0.3
CO-like	2	0.2	2	1	0.3	4	0.4	24	1	15	0.9	11	0.6	24	0.7	19	0.9	16	0.6
CPP	2	0.2	2	1	0.3	2	0.2	11	0.5	11	0.7	12	0.6	18	0.5	10	0.5	13	0.5
DBB	4	0.3	4	1	0.5	12	1.1	10	0.4	10	0.6	11	0.6	19	0.6	12	0.6	16	0.6
Dof	19	1.4	19	1	2.6	22	2	44	1.8	27	1.6	30	1.5	67	2	43	2.1	48	1.9
E2F/DP	1	0.1	1	1	0.1	3	0.3	13	0.5	7	0.4	9	0.5	24	0.7	12	0.6	10	0.4
EIL	4	0.3	4	1	0.5	10	0.9	8	0.3	7	0.4	8	0.4	13	0.4	6	0.3	8	0.3
ERF	22	1.7	22	1	3	112	10.1	190	7.8	114	6.8	143	7.4	242	7.2	132	6.5	176	6.8
FAR1	15	1.1	15	1	2	7	0.6	92	3.8	64	3.8	71	3.7	7	0.2	20	1	54	2.1
G2-like	25	1.9	25	1	3.4	31	2.8	70	2.9	59	3.5	56	2.9	98	2.9	55	2.7	74	2.9
GATA	7	0.5	7	1	1	24	2.2	33	1.4	30	1.8	32	1.7	58	1.7	31	1.5	46	1.8
GeBP	1	0.1	1	1	0.1	5	0.5	7	0.3	15	0.9	9	0.5	33	1	23	1.1	8	0.3
GRAS	12	0.9	12	1	1.6	46	4.1	85	3.5	46	2.7	64	3.3	101	3	36	1.8	104	4
GRF	2	0.2	2	1	0.3	13	1.2	18	0.7	7	0.4	13	0.7	40	1.2	9	0.4	19	0.7
HB-other	14	1.1	14	1	1.9	15	1.4	17	0.7	15	0.9	15	0.8	26	0.8	8	0.4	15	0.6
HB-PHD						0	0	2	0.1	4	0.2	1	0.1	7	0.2	2	0.1	4	0.2
HD-ZIP	17	1.3	17	1	2.3	40	3.6	65	2.7	45	2.7	46	2.4	105	3.1	56	2.8	67	2.6
HRT-like	3	0.2	3	1	0.4	0	0	2	0.1	1	0.1	1	0.1	3	0.1	2	0.1	1	0
HSF	3	0.2	3	1	0.4	17	1.5	26	1.1	25	1.5	31	1.6	54	1.6	25	1.2	31	1.2
LBD	4	0.3	4	1	0.5	14	1.3	68	2.8	25	1.5	42	2.2	60	1.8	43	2.1	59	2.3
LFY						0	0	2	0.1	1	0.1	2	0.1	4	0.1	1	0	1	0
LSD	2	0.2	2	1	0.3	0	0	5	0.2	12	0.7	5	0.3	18	0.5	6	0.3	6	0.2
MIKC	12	0.9	12	1	1.6	21	1.9	58	2.4	54	3.2	36	1.9	80	2.4	66	3.3	36	1.4
M-type	16	1.2	16	1	2.2	2	0.2	60	2.5	23	1.4	36	1.9	46	1.4	73	3.6	72	2.8
MYB	44	3.3	44	1	6	75	6.8	201	8.3	74	4.4	124	6.4	216	6.4	159	7.9	212	8.2
MYB_related	370	28.1	65	5.7	8.8	59	5.3	114	4.7	84	5	94	4.9	160	4.8	85	4.2	104	4
NAC	124	9.4	32	3.9	4.3	50	4.5	142	5.8	100	5.9	163	8.4	190	5.7	135	6.7	182	7
NF-X1	40	3	10	4	1.4	0	0	3	0.1	2	0.1	2	0.1	3	0.1	2	0.1	3	0.1
NF-YA	9	0.7	3	3	0.4	5	0.5	12	0.5	13	0.8	12	0.6	30	0.9	15	0.7	20	0.8
NF-YB	23	1.7	7	3.3	1	10	0.9	27	1.1	18	1.1	14	0.7	31	0.9	19	0.9	22	0.9
NF-YC	41	3.1	12	3.4	1.6	11	1	14	0.6	15	0.9	15	0.8	22	0.7	15	0.7	16	0.6
Nin-like	3	0.2	1	3	0.1	7	0.6	15	0.6	16	0.9	13	0.7	27	0.8	14	0.7	20	0.8
NZZ/SPL	2	0.2	1	2	0.1	0	0	3	0.1	0	0	0	0	0	0	1	0	2	0.1
RAV						1	0.1	7	0.3	4	0.2	4	0.2	4	0.1	6	0.3	4	0.2
S1Fa-like	68	5.2	28	2.4	3.8	2	0.2	2	0.1	1	0.1	3	0.2	4	0.1	4	0.2	2	0.1
SAP						0	0	2	0.1	0	0	0	0	0	0	1	0	1	0
SBP	2	0.2	1	2	0.1	13	1.2	32	1.3	18	1.1	20	1	54	1.6	18	0.9	32	1.2
SRS	2	0.2	1	2	0.1	4	0.4	9	0.4	5	0.3	5	0.3	12	0.4	12	0.6	11	0.4
STAT						0	0	2	0.1	2	0.1	1	0.1	2	0.1	2	0.1	3	0.1
TALE	25	1.9	9	2.8	1.2	14	1.3	29	1.2	29	1.7	28	1.4	47	1.4	23	1.1	35	1.4
TCP	16	1.2	8	2	1.1	23	2.1	33	1.4	21	1.2	23	1.2	54	1.6	28	1.4	33	1.3
Trihelix	50	3.8	22	2.3	3	33	3	46	1.9	25	1.5	25	1.3	41	1.2	26	1.3	46	1.8
VOZ	2	0.2	1	2	0.1	5	0.5	3	0.1	2	0.1	2	0.1	7	0.2	2	0.1	4	0.2
Whirly	12	0.9	7	1.7	1	1	0.1	3	0.1	2	0.1	2	0.1	6	0.2	4	0.2	4	0.2
WOX	1	0.1	1	1	0.1	6	0.5	23	0.9	9	0.5	12	0.6	27	0.8	17	0.8	20	0.8
WRKY	31	2.4	31	1	4.2	55	5	98	4	78	4.6	116	6	180	5.4	89	4.4	119	4.6
YABBY	2	0.2	2	1	0.3	4	0.4	10	0.4	15	0.9	10	0.5	28	0.8	7	0.3	13	0.5
ZF-HD	5	0.4	5	1	0.7	15	1.4	24	1	15	0.9	15	0.8	39	1.2	17	0.8	24	0.9
Sum	1317		736			1111		2436		1687		1936		3355		2016		2585
*The percent is the proportion of the total TF sequences of specific species in PlantTFDB 2.0.
