# Supplementary material for: Generation, Annotation and Analysis of First Large-Scale Expressed Sequence Tags from Developing Fiber of Gossypium barbadense L
Source: PLoS One. 2011 Jul 28;6(7):e22758. doi: 10.1371/journal.pone.0022758 (PMC3145671; doi:10.1371/journal.pone.0022758)
Supplement: Table S16 — Number of dinucleotide and trinucleotide repeats. (XLS) [file pone.0022758.s020.xls]

## Sheet: TableS16
Table S16 Number of di- and trinucleotide repeats
Repeat type	Motif	Number	Perncent(%)
Dinucleotide	AC	14	14.9
	AG	36	38.3
	AT	44	46.8
Trinucleotide	AAC	15	8
	AAG	55	29.4
	AAT	19	10.2
	ACC	27	14.4
	ACG	4	2.1
	ACT	3	1.6
	AGC	17	9.1
	AGG	7	3.7
	ATC	34	18.2
	CCG	6	3.2
